# Supplementary material for: Sodium-glucose cotransporter protein-2 (SGLT-2) inhibitors and glucagon-like peptide-1 (GLP-1) receptor agonists for type 2 diabetes: systematic review and network meta-analysis of randomised controlled trials
Source: PubMed Central journal article supplement — BMJ. 2021 Jan 13;372:m4573. doi: 10.1136/bmj.m4573 (PMC7804890; doi:10.1136/bmj.m4573), 2021-01-13
Supplement: pals058523.ww.pdf [file pals058523.ww.pdf]

## Search strategies

### MEDLINE

1. exp Diabetes Mellitus Type 2/
2. Diabetes Mellitus/
3. ((diabetes or diabetes mellitus or diabetic\*) adj1 (type 2 or type II or type ii or non-insulin dependent or noninsulin dependent or adult onset or mature onset or late onset)).tw.
4. NIDDM.tw.
5. Diabetic Nephropathies/
6. (diabetic nephropath\* or diabetic kidney disease).tw.
7. or/1-6
8. exp Insulin, Long Acting/
9. ((long acting or longer acting or intermediate acting) adj insulin\*).tw.
10. (insulin adj1 degludec).tw.
11. (insulin adj1 glargine).tw.
12. (insulin adj1 detemir).tw.
13. (insulin adj1 zinc).tw.
14. (insulin adj1 isophane).tw.
15. (insulin adj1 aspart).tw.
16. (insulin adj1 lispro).tw.
17. (insulin adj1 lente).tw.
18. (insulin adj1 ultralente).tw.
19. Sulfonylurea Compounds/
20. Acetohexamide/
21. Carbutamide/
22. Chlorpropamide/
23. Gliclazide/
24. Glipizide/
25. Glyburide/
26. Tolazamide/
27. (sulphonylurea or sulphonylureas).tw.
28. acetohexamide.tw.
29. carbutamide.tw.
30. chlorpropamide.tw.
31. glibenclamide.tw.
32. gliclazide.tw.
33. glimepiride.tw.
34. glibornuride.tw.
35. glipizide.tw.
36. gliquidone.tw.
37. glyburide.tw.
38. glycopyramide.tw.
39. tolazamide.tw.
40. Biguanides/
41. biguanides.tw.
42. Metformin/
43. metformin.tw.
44. alpha-Glucosidases/ai
45. alpha glucosidase inhibitor\*.tw.

46. Acarbose/
47. acarbose.tw.
48. miglitol.tw.
49. voglibose.tw.
50. Thiazolidinediones/
51. thiazolidinedione\*.tw.
52. pioglitazone.tw.
53. rivoglitazone.tw.
54. rosiglitazone.tw.
55. meglitinide\*.tw.
56. repaglinide.tw.
57. nateglinide.tw.
58. mitiglinide.tw.
59. Receptors, Glucagon/
60. Glucagon-like Peptide 1/
61. (glucagon-like peptide 1 receptor inhibitor\* or glucagon-like peptide 1 receptor agonist\* or glucagon-like peptide 1 inhibitor\* or glucagon-like peptide 1 agonist\* or GLP-1 receptor inhibitor\* or GLP-1 receptor agonist\* or GLP-1 inhibitor\* or GLP-1 agonist\*).tw.
62. dulaglutide.tw.
63. (exenatide or exendin 4).tw.
64. liraglutide.tw.
65. semaglutide.tw.
66. taspoglutide.tw.
67. lixisenatide.tw.
68. albiglutide.tw.
69. Dipeptidyl-peptidase IV Inhibitors/
70. (dipeptidyl-peptidase IV Inhibitor\* or dipeptidyl-peptidase 4 Inhibitor\* or ((DPP4 or DPP 4 or DPP IV) adj inhibitor\*)).tw.
71. omarigliptin.tw.
72. vildagliptin.tw.
73. sitagliptin.tw.
74. saxagliptin.tw.
75. linagliptin.tw.
76. alogliptin.tw.
77. septagliptin.tw.
78. gemigliptin.tw.
79. anagliptin.tw.
80. teneligliptin.tw.
81. evogliptin.tw.
82. dutogliptin.tw.
83. retagliptin.tw.
84. Sodium-Glucose Transporter 2/
85. (sodium glucose transporter 2 inhibitor\* or sodium glucose transporter ii inhibitor\* or SGLT 2 inhibitor\*).tw.
86. (sodium glucose cotransporter adj3 inhibitor\*).tw.
87. (sodium glucose co transporter adj3 inhibitor\*).tw.
88. canagliflozin.tw.
89. dapagliflozin.tw.
90. empagliflozin.tw.
91. ertugliflozin.tw.

92. tofogliflozin.tw.
93. bexagliflozin.tw.
94. henagliflozin.tw.
95. ipragliflozin.tw.
96. licogliflozin.tw.
97. luseogliflozin.tw.
98. remogliflozin.tw.
99. sergliflozin.tw.
100. sotagliflozin.tw.
101. (amylin adj1 (analogue\* or derivative\*)).tw.
102. pramlintide.tw.
103. Insulins/
104. Hypoglycemic Agents/
105. or/8-104
106. and/7,105
107. randomized controlled trial.pt.
108. controlled clinical trial.pt.
109. pragmatic clinical trial.pt.
110. randomized.ab.
111. randomised.ab
112. placebo.ab.
113. clinical trials as topic/
114. randomly.ab.
115. trial.ti.
116. or/107-115
117. animals/ not (humans/ and animals/)
118. 116 not 117
119. and/106,118

## Embase

1. diabetes mellitus/
2. non insulin dependent diabetes mellitus/
3. ((diabetes or diabetes mellitus or diabetic\*) adj1 (type 2 or type II or type ii or non-insulin dependent or noninsulin dependent or adult onset or mature onset or late onset)).tw.
4. NIDDM.tw.
5. Diabetic Nephropathy/
6. (diabetic nephropath\* or diabetic kidney disease).tw.
7. Or/1-6
8. long acting insulin/
9. ((long acting or longer acting or intermediate acting) adj insulin\*).tw.
10. insulin degludec/
11. (insulin adj1 degludec).tw.
12. insulin detemir/
13. (insulin adj1 detemir).tw.
14. insulin glargine/
15. (insulin adj1 glargine).tw.
16. insulin zinc suspension/
17. (insulin adj1 zinc).tw.
18. insulin aspart/
19. (insulin adj1 aspart).tw.
20. insulin lispro/
21. (insulin adj1 lispro).tw.
22. isophane insulin/
23. (insulin adj1 isophane).tw.
24. (insulin adj1 lente).tw.
25. (insulin adj1 ultralente).tw.
26. meglitinide/
27. meglitinide\*.tw.
28. mitiglinide/
29. mitiglinide.tw.
30. nateglinide/
31. nateglinide.tw.
32. repaglinide/
33. repaglinide.tw.
34. amylin derivative/
35. (amylin analogue\* or amylin derivative\*).tw.
36. pramlintide/
37. pramlintide.tw.
38. biguanide derivative/
39. biguanide\*.tw.
40. metformin.tw,sh.
41. sulphonylurea derivative/
42. sulphonylurea\*.tw.
43. acetohexamide/
44. carbutamide/
45. chlorpropamide/
46. glibenclamide/
47. glibornuride/
48. gliclazide/

49. glimepiride.sh,tw.
50. glipizide/
51. gliquidone/
52. tolazamide/
53. acetohexamide.tw.
54. carbutamide.tw.
55. chlorpropamide.tw.
56. glibenclamide.tw.
57. gliclazide.tw.
58. glimepiride.tw.
59. glibornuride.tw.
60. glipizide.tw.
61. gliquidone.tw.
62. glyburide.tw.
63. glycopyramide.tw.
64. tolazamide.tw.
65. alpha glucosidase inhibitor/
66. alpha glucosidase inhibitor\*.tw.
67. acarbose/
68. miglitol/
69. voglibose/
70. acarbose.tw.
71. miglitol.tw.
72. voglibose.tw.
73. glitazone derivative/
74. (glitazone adj1 (derivative\* or analogue\*)).tw.
75. thiazolidinedione\*.tw.
76. pioglitazone/
77. rivoglitazone/
78. rosiglitazone/
79. pioglitazone.tw.
80. rivoglitazone.tw.
81. rosiglitazone.tw.
82. glucagon like peptide 1 receptor agonist/
83. (glucagon-like peptide 1 receptor inhibitor\* or glucagon-like peptide 1 receptor agonist\* or glucagon-like peptide 1 inhibitor\* or glucagon-like peptide 1 agonist\* or GLP-1 receptor inhibitor\* or GLP-1 receptor agonist\* or GLP-1 inhibitor\* or GLP-1 agonist\*).tw.
84. albiglutide/
85. dulaglutide/
86. exendin 4/
87. liraglutide/
88. lixisenatide/
89. semaglutide/
90. taspoglutide/
91. albiglutide.tw.
92. dulaglutide.tw.
93. (exenatide or exendin 4).tw.
94. liraglutide.tw.
95. lixisenatide.tw.
96. semaglutide.tw.

97.           tasoglutide.tw.
98.           dipeptidyl peptidase IV inhibitor/
99.           (dipeptidyl-peptidase IV Inhibitor\* or dipeptidyl-peptidase 4 Inhibitor\* or  
              ((DPP4 or DPP 4 or DPP IV) adj inhibitor\*)).tw.
100.          alogliptin/
101.          anagliptin/
102.          gemigliptin/
103.          linagliptin/
104.          omarigliptin/
105.          saxagliptin/
106.          sitagliptin/
107.          teneligliptin/
108.          vildagliptin/
109.          alogliptin.tw.
110.          anagliptin.tw.
111.          gemigliptin.tw.
112.          linagliptin.tw.
113.          omarigliptin.tw.
114.          saxagliptin.tw.
115.          sitagliptin.tw.
116.          teneligliptin.tw.
117.          vildagliptin.tw.
118.          evogliptin.tw.
119.          dutogliptin.tw.
120.          retagliptin.tw.
121.          sodium glucose cotransporter 2 inhibitor/
122.          (sodium glucose transporter 2 inhibitor\* or sodium glucose transporter ii  
              inhibitor\* or SGLT 2 inhibitor\*).tw.
123.          (sodium glucose cotransporter adj3 inhibitor\*).tw.
124.          (sodium glucose co transporter adj3 inhibitor\*).tw.
125.          canagliflozin/
126.          dapagliflozin.tw.
127.          empagliflozin/
128.          ertugliflozin/
129.          tofogliflozin/
130.          canagliflozin.tw.
131.          dapagliflozin.tw.
132.          empagliflozin.tw.
133.          ertugliflozin.tw.
134.          tofogliflozin.tw.
135.          bexagliflozin.tw.
136.          henagliflozin.tw.
137.          ipragliflozin.tw.
138.          licogliflozin.tw.
139.          luseogliflozin.tw.
140.          remogliflozin.tw.
141.          sergliflozin.tw.
142.          sotagliflozin.tw.
143.          antidiabetic agent/
144.          oral antidiabetic agent/
145.          or/8-144

146. and/7,145
147. randomized controlled trial/
148. double-blind procedure/
149. single-blind procedure/
150. random\$.tw.
151. factorial\$.tw.
152. placebo\$.tw.
153. (double\$ adj blind\$).tw.
154. (singl\$ adj blind\$).tw.
155. assign\$.tw.
156. allocat\$.tw.
157. or/147-156
158. and/146,157
159. MEDLINE.cr.
160. 158 not 159
161. (mouse or mice or murine or rat or rats or dog or dogs or animal\*).ti.
162. 160 not 161

## Cochrane Central Register of Controlled Trials (CENTRAL)

- #1. MeSH descriptor: [Diabetes Mellitus] this term only
- #2. ((diabetes or diabetic\* or "diabetes mellitus") near/1 ("type 2" or "type ii" or "non-insulin dependent" or "non insulin dependent" or "noninsulin dependent" or "adult onset" or "mature onset" or "late onset")):ti,ab,kw
- #3. ("diabetes mellitus" not "insulin dependent diabetes mellitus"):kw
- #4. #3 and EMBASE
- #5. NIDDM:ti,ab,kw
- #6. ((diabetic next nephropath\*) or "diabetic kidney disease"):ti,ab,kw
- #7. {or #1-#2, #4-#6}
- #8. ((long acting or longer acting or intermediate acting) near/1 insulin\*):ti,ab,kw
- #9. insulin near/1 degludec:ti,ab,kw
- #10. insulin near/1 detemir:ti,ab,kw
- #11. insulin near/1 glargine:ti,ab,kw
- #12. insulin near/1 zinc
- #13. insulin near/1 aspart:ti,ab,kw
- #14. insulin near/1 lispro:ti,ab,kw
- #15. insulin near/1 isophane:ti,ab,kw
- #16. insulin near/1 ultralente:ti,ab,kw
- #17. insulin near/1 lente
- #18. meglitinide\*:ti,ab,kw
- #19. mitiglinide:ti,ab,kw
- #20. nateglinide:ti,ab,kw
- #21. repaglinide:ti,ab,kw
- #22. (amylin next analogue\* or amylin next derivative\*):ti,ab,kw
- #23. pramlintide:ti,ab,kw
- #24. biguanide\*:ti,ab,kw
- #25. metformin:ti,ab,kw
- #26. (sulfonylurea\* or sulphonylurea\*):ti,ab,kw
- #27. acetohexamide:ti,ab,kw
- #28. carbutamide:ti,ab,kw
- #29. chlopropramide:ti,ab,kw
- #30. glibenclamide:ti,ab,kw
- #31. gliclazide:ti,ab,kw
- #32. glimepiride:ti,ab,kw
- #33. glibornuride:ti,ab,kw
- #34. glipizide:ti,ab,kw
- #35. gliquidone:ti,ab,kw
- #36. glyburide:ti,ab,kw
- #37. glycopyramide:ti,ab,kw
- #38. tolazimide:ti,ab,kw
- #39. MeSH descriptor: [alpha-Glucosidases] this term only and with qualifier(s):  
[Antagonists & inhibitors
- #40. alpha next glucosidase next inhibitor\*:ti,ab,kw
- #41. acarbose:ti,ab,kw
- #42. miglitol:ti,ab,kw
- #43. voglibose:ti,ab,kw
- #44. (glitazone near/1 (derivative\* or analogue\*)):ti,ab,kw
- #45. thiazolidinedione:ti,ab,kw
- #46. pioglitazone:ti,ab,kw
- #47. rivoglitazone:ti,ab,kw



- #48. rosiglitazone:ti,ab,kw
- #49. MeSH descriptor: [Receptors, Glucagon] explode all trees and with qualifier(s): [Agonists - AG]
- #50. MeSH descriptor: [Glucagon-Like Peptide 1] explode all trees and with qualifier(s): [Antagonists & inhibitors - AI]
- #51. ("glucagon-like peptide 1 receptor inhibitor" or "glucagon-like peptide 1 receptor agonist" or "glucagon-like peptide 1 inhibitor" or "glucagon-like peptide 1 agonist" or "GLP-1 receptor inhibitor" or "GLP-1 receptor agonist" or "GLP-1 inhibitor" or "GLP-1 agonist"):ti,ab,kw
- #52. ("glucagon-like peptide 1 receptor inhibitors" or "glucagon-like peptide 1 receptor agonists" or "glucagon-like peptide 1 inhibitors" or "glucagon-like peptide 1 agonists" or "GLP-1 receptor inhibitors" or "GLP-1 receptor agonists" or "GLP-1 inhibitors" or "GLP-1 agonists"):ti,ab,kw
- #53. albiglutide:ti,ab,kw
- #54. dulaglutide:ti,ab,kw
- #55. (exenatide or "exendin 4"):ti,ab,kw
- #56. liraglutide:ti,ab,kw
- #57. lixisenatide:ti,ab,kw
- #58. semaglutide:ti,ab,kw
- #59. taspoglutide:ti,ab,kw
- #60. ("dipeptidyl-peptidase IV Inhibitor" or "dipeptidylpeptidase 4 Inhibitor" or "dipeptidyl-peptidase IV Inhibitors" or "dipeptidyl-peptidase 4 Inhibitors"):ti,ab,kw
- #61. ((DPP4 or DPP 4 or DPP IV) next inhibitor\*):ti,ab,kw
- #62. alogliptin:ti,ab,kw
- #63. anagliptin:ti,ab,kw
- #64. gemigliptin:ti,ab,kw
- #65. linagliptin:ti,ab,kw
- #66. omarigliptin:ti,ab,kw
- #67. saxagliptin:ti,ab,kw
- #68. sitagliptin:ti,ab,kw
- #69. teneligliptin:ti,ab,kw
- #70. vildagliptin:ti,ab,kw
- #71. evogliptin:ti,ab,kw
- #72. dutogliptin:ti,ab,kw
- #73. retagliptin:ti,ab,kw
- #74. MeSH descriptor: [Sodium-Glucose Transporter 2] explode all trees and with qualifier(s): [Antagonists & inhibitors - AI]
- #75. ("sodium glucose transporter 2 inhibitor" or "sodium glucose transporter ii inhibitor" or "SGLT 2 inhibitor" or "sodium glucose transporter 2 inhibitors" or "sodium glucose transporter ii inhibitors" or "SGLT 2 inhibitors"):ti,ab,kw
- #76. ("sodium glucose cotransporter" near/3 inhibitor\*):ti,ab,kw
- #77. ("sodium glucose co-transporter" near/3 inhibitor\*):ti,ab,kw
- #78. canagliflozin:ti,ab,kw
- #79. dapagliflozin:ti,ab,kw
- #80. empagliflozin:ti,ab,kw
- #81. ertugliflozin:ti,ab,kw
- #82. tofogliflozin:ti,ab,kw
- #83. bexagliflozin:ti,ab,kw
- #84. henagliflozin:ti,ab,kw
- #85. ipragliflozin:ti,ab,kw

#86 licogliflozin:ti,ab,kw  
#87 luseogliflozin:ti,ab,kw  
#88 remogliflozin:ti,ab,kw  
#89 sergliflozin:ti,ab,kw  
#90 sotagliflozin:ti,ab,kw  
#91 MeSH descriptor: [Insulins] this term only  
#92 MeSH descriptor: [Hypoglycemic Agents] this term only  
#93 (antidiabetic next agent\*):kw  
#94 (oral next antidiabetic next agent\*):kw  
#95 {or #8-#94}  
#96 {and #7, #95}

Appendix 2 Included studies

| Study                 | Trial registration | Number of participants | Year | Duration of follow-up (months) | Country       | Randomised treatments | Dose              | Setting                 | Age (mean), (SD) | Age (SD) | % men | HbA1C (mean), (SD) | HbA1C (SD) | BMI (mean), (SD) | BMI (SD) | Duration of diabetes (years) | Cardiovascular disease (%) | Estimated glomerular filtration rate | Albumin : creatinine ratio | Additional non-randomised glucose-lowering interventions                                                             |
|-----------------------|--------------------|------------------------|------|--------------------------------|---------------|-----------------------|-------------------|-------------------------|------------------|----------|-------|--------------------|------------|------------------|----------|------------------------------|----------------------------|--------------------------------------|----------------------------|----------------------------------------------------------------------------------------------------------------------|
| 30                    | UMIN00003784       | 80                     | 2015 | 5.5                            | Japan         | Staglipitin           | 50 mg daily       | Heart failure           | 67.8             | 10.5     | 50    | 7.1                | 0.7        | 27.7             | 4.1      | 48                           | 13                         | 74.8                                 |                            | Metformin, sulfonylurea, or pioglitazone                                                                             |
| 30                    |                    |                        |      |                                |               | Voglibose             | 0.6 mg daily      |                         | 66.7             | 9.8      | 65    | 6.9                | 0.5        | 25.7             | 4.3      | 38.5                         | 5                          | 70.5                                 |                            |                                                                                                                      |
| 4B                    | NCT00960661        | 627                    | 2014 | 7.5                            | Multinational | Exenatide             | 10-20 mcg daily   |                         | 59.5             | 9.6      | 52    | 8.3                | 1          | 32.7             | 4.7      | 12                           |                            |                                      |                            | Metformin + insulin glargine                                                                                         |
| 4T                    | ISRCTN1125379      | 473                    | 2007 | 12                             | Multinational | Insulin detemir       | Titrated          |                         | 59.4             | 9.3      | 51    | 8.2                | 1          | 32.9             | 4.7      | 11                           |                            |                                      |                            |                                                                                                                      |
| 4T                    |                    |                        |      |                                |               | Insulin aspart        | Titrated          |                         | 61.9             | 10       | 61.1  | 8.4                | 0.8        | 29.7             | 4.6      | 9                            |                            |                                      |                            | Metformin + sulfonylurea                                                                                             |
| 1860-LIRA-DPP-4       | NCT00700817        | 665                    | 2010 | 6                              | Multinational | Staglipitin           | 100 mg daily      |                         | 61.6             | 10.5     | 63.6  | 8.6                | 0.8        | 29.6             | 4.5      | 9                            |                            |                                      |                            |                                                                                                                      |
| 1860-LIRA-DPP-4       |                    |                        |      |                                |               | Liraglutide           | 1.8 mg daily      |                         | 55               | 9        | 55    | 8.5                | 0.7        | 32.6             | 5.4      | 6.3                          |                            |                                      |                            | Metformin                                                                                                            |
| 1860-LIRA-DPP-4       |                    |                        |      |                                |               | Liraglutide           | 1.2 mg daily      |                         | 55               | 9.1      | 52    | 8.4                | 0.7        | 31.1             | 5.1      | 6.4                          |                            |                                      |                            |                                                                                                                      |
| Abe 2008              | Not provided       | 63                     | 2008 | 22                             | Japan         | Pioglitazone          | 15-30 mg daily    | Haemodialysis           | 65.2             | 12.1     | 67.7  | 8.2                | 1          | 22.2             | 2.5      | 16.6                         |                            |                                      |                            | Alpha glucosidase inhibitor ± metglitide                                                                             |
| Abe 2008              |                    |                        |      |                                |               | Control               |                   |                         | 67.2             | 9.4      | 68.9  | 8.5                | 0.8        | 22.2             | 2.7      | 16.3                         |                            |                                      |                            |                                                                                                                      |
| Abe 2016              | UMIN000018445      | 82                     | 2016 | 5.5                            | Japan         | Sanaglitin            | 2.5 mg daily      | Haemodialysis           | 66.9             | 9.4      | 65.9  | 6.5                | 0.8        | 22.8             | 3.7      | 17.1                         |                            |                                      |                            | Oral drugs and/or insulin                                                                                            |
| Abe 2016              |                    |                        |      |                                |               | Control               |                   |                         | 66.3             | 9.3      | 68.3  | 6.5                | 0.7        | 22.5             | 3.7      | 14.6                         |                            |                                      |                            |                                                                                                                      |
| ACTION-J              | UMIN00002333       | 54                     | 2011 | 11                             | Japan         | Pioglitazone          | 15-30 mg daily    |                         | 56               | 9.7      | 81.8  | 8.59               | 1.3        | 25.5             | 3.1      | 13.4                         |                            |                                      |                            | Insulin                                                                                                              |
| ACTION-J              |                    |                        |      |                                |               | Control               |                   |                         | 57.2             | 11.3     | 69.2  | 8.64               | 1.2        | 26.9             | 4.4      | 14.8                         |                            |                                      |                            |                                                                                                                      |
| ADOPT                 | NCT00279045        | 4360                   | 2006 | 48                             | Multinational | Metformin             | 500-2000 mg daily |                         | 57.9             | 9.9      | 59.4  | 7.36               | 0.9        | 32.1             | 6.1      |                              |                            |                                      |                            | None                                                                                                                 |
| ADOPT                 |                    |                        |      |                                |               | Glyburide             | 2.5-15 mg daily   |                         | 56.4             | 10.2     | 58    | 7.35               | 0.9        | 32.2             | 6.3      |                              |                            |                                      |                            |                                                                                                                      |
| ADOPT                 |                    |                        |      |                                |               | Rosiglitazone         | 4-8 mg daily      |                         | 56.3             | 10       | 55.7  | 7.36               | 0.9        | 32.2             | 6.7      |                              |                            |                                      |                            |                                                                                                                      |
| Ahmann 2015           | NCT01617434        | 450                    | 2015 | 5.5                            | Multinational | Liraglutide           | 1.8 mg daily      |                         | 59.3             | 9.2      | 53.3  | 8.2                | 0.8        | 32.3             | 5.6      | 12.1                         |                            |                                      |                            | Metformin + basal insulin                                                                                            |
| Ahmann 2015           |                    |                        |      |                                |               | Placebo               |                   |                         | 57.5             | 11.1     | 60.4  | 8.3                | 0.9        | 32.2             | 5.7      | 12.1                         |                            |                                      |                            |                                                                                                                      |
| Ahrén 2004            | Not applicable     | 71                     | 2004 | 12                             | Sweden        | Vildagliptin          | 50 mg daily       |                         | 58.4             | 9.2      | 61.9  | 7.6                | 0.6        | 29.6             | 3.7      | 5.8                          |                            |                                      |                            | Metformin                                                                                                            |
| Ahrén 2004            |                    |                        |      |                                |               | Placebo               |                   |                         | 54.3             | 12.2     | 75.9  | 7.8                | 0.6        | 29.9             | 3.6      | 4.6                          |                            |                                      |                            |                                                                                                                      |
| Allegretti 2019       | NCT02836873        | 312                    | 2019 | 6                              | Multinational | Bevoglitazone         | 20 mg daily       | Chronic kidney disease  | 69.3             | 8.36     | 58.6  | 8.01               | 0.79       | 30.3             | 5.99     | 15.3                         |                            | 45.4                                 |                            | Oral hypoglycaemic agents                                                                                            |
| Allegretti 2019       |                    |                        |      |                                |               | Placebo               |                   |                         | 69.9             | 8.29     | 67.1  | 7.95               | 0.81       | 30.1             | 5.77     | 16.5                         |                            |                                      |                            |                                                                                                                      |
| Allogliptin Study 007 | NCT0286468         | 500                    | 2009 | 6                              | Multinational | Allogliptin           | 25 mg daily       |                         | 56.5             | 11.7     | 50    | 8.09               | 0.9        | 30               | 4.8      | 6.4                          |                            |                                      |                            | Sulfonylurea                                                                                                         |
| Allogliptin Study 007 |                    |                        |      |                                |               | Placebo               |                   |                         | 56.5             | 11.1     | 54.7  | 8.08               | 0.83       | 30.2             | 4.8      | 7.8                          |                            |                                      |                            |                                                                                                                      |
| Allogliptin Study 007 |                    |                        |      |                                |               | Placebo               |                   |                         | 57.1             | 10       | 51.5  | 8.15               | 0.85       | 30               | 5.3      | 7.7                          |                            |                                      |                            |                                                                                                                      |
| Allogliptin Study 009 | NCT0286494         | 493                    | 2009 | 6                              | Multinational | Allogliptin           | 25 mg daily       |                         | 55.4             | 10.2     | 62.8  | 8                  | 0.8        | 33.1             | 5.4      | 7.4                          |                            |                                      |                            | Thiazolidinedione ± metformin or sulfonylurea                                                                        |
| Allogliptin Study 009 |                    |                        |      |                                |               | Placebo               |                   |                         | 55.5             | 9.4      | 55.3  | 8.1                | 0.9        | 32.3             | 5.7      | 7.7                          |                            |                                      |                            |                                                                                                                      |
| Allogliptin Study 009 |                    |                        |      |                                |               | Placebo               |                   |                         | 55.2             | 10.8     | 54.6  | 8                  | 0.8        | 33.2             | 6.2      | 7.8                          |                            |                                      |                            |                                                                                                                      |
| Allogliptin Study 010 | NCT0286455         | 328                    | 2008 | 6                              | Multinational | Allogliptin           | 25 mg daily       |                         |                  |          |       |                    |            |                  |          |                              |                            |                                      |                            | None                                                                                                                 |
| Allogliptin Study 010 |                    |                        |      |                                |               | Placebo               |                   |                         |                  |          |       |                    |            |                  |          |                              |                            |                                      |                            |                                                                                                                      |
| Alvarsson 2003        | Not applicable     | 51                     | 2003 | 12                             | Sweden        | Glibenclamide         | 1.75-3.5 mg daily |                         | 55.6             | 7.3      | 71.4  | 6.9                | 0.9        | 27.8             | 3.7      |                              |                            |                                      |                            | None                                                                                                                 |
| Alvarsson 2003        |                    |                        |      |                                |               | Mixtard 30/70 ins     | Titrated          |                         | 51.1             | 7.2      | 61.1  | 7.3                | 1.7        | 27.3             | 3        |                              |                            |                                      |                            |                                                                                                                      |
| APOLLO                | NCT00311818        | 415                    | 2008 | 12                             | Multinational | Insulin glargine      | Titrated          |                         | 60               | 9        | 52    | 8.7                | 0.96       | 29.2             | 3.7      | 9                            |                            |                                      |                            | Oral agents excluding alpha-glucosidase inhibitors                                                                   |
| APOLLO                |                    |                        |      |                                |               | Insulin lispro        | Titrated          |                         | 59.7             | 9        | 59    | 8.67               | 0.97       | 29.4             | 3.5      | 8.5                          |                            |                                      |                            |                                                                                                                      |
| Apovlan 2010          | Not provided       | 194                    | 2010 | 5.5                            | USA           | Exenatide             | 10 mcg daily      |                         | 54.5             | 10       | 37    | 7.7                | 0.9        | 33.6             | 3.7      | 5.7                          |                            |                                      |                            | Metformin or sulfonylurea                                                                                            |
| Apovlan 2010          |                    |                        |      |                                |               | Placebo               |                   |                         | 55.1             | 9        | 38    | 7.5                | 0.8        | 33.9             | 4.3      | 5.3                          |                            |                                      |                            |                                                                                                                      |
| APPROACH              | NCT00116831        | 672                    | 2010 | 18                             | Multinational | Glipizide             | 5-15 mg daily     | Coronary artery disease | 60.2             | 9        | 65.8  | 7.2                | 0.9        | 29.8             | 5.3      |                              |                            |                                      |                            | 1-2 oral agents                                                                                                      |
| APPROACH              |                    |                        |      |                                |               | Rosiglitazone         | 4-8 mg daily      |                         | 61.8             | 8.4      | 70    | 7.1                | 0.8        | 29.3             | 5.5      |                              |                            |                                      |                            |                                                                                                                      |
| APRIME                | UMIN00004367       | 63                     | 2011 | 12                             | Japan         | Metformin             | 500-750 mg daily  | Chronic kidney disease  | 62.5             | 10.2     | 75    | 7.9                | 1.1        | 24.5             | 3.4      | 9.5                          | 0                          | 75                                   | 111                        | Insulin or oral hypoglycemic agents other than thiazolidinediones/metformin                                          |
| APRIME                |                    |                        |      |                                |               | Pioglitazone          | 15 mg daily       |                         | 62.4             | 8.4      | 67.7  | 8                  | 1.1        | 25.6             | 3.2      | 11.6                         | 0                          | 79                                   | 143                        |                                                                                                                      |
| Araki 2015            | NCT01368081        | 336                    | 2015 | 12                             | Japan         | Metformin             | 500-2350 mg daily |                         | 60               | 10.2     | 75    | 7.93               | 0.79       | 25.2             | 3.6      |                              |                            |                                      |                            | Monotherapy with sulfonylurea, biguanide, thiazolidinedione, alpha glucosidase inhibitor, DPP-4 inhibitor or glinide |
| Araki 2015            |                    |                        |      |                                |               | Empagliflozin         | 25 mg daily       |                         | 61.8             | 9.6      | 70    | 8.06               | 0.76       | 25.2             | 4.2      |                              |                            |                                      |                            |                                                                                                                      |
| Araki 2015            |                    |                        |      |                                |               | Empagliflozin         | 10 mg daily       |                         | 61.3             | 9.9      | 73    | 7.99               | 0.73       | 24.6             | 3.8      |                              |                            |                                      |                            |                                                                                                                      |
| Araki 2015a           | NCT01584232        | 361                    | 2015 | 5.5                            | Japan         | Dulaglutide           | 0.75 mg weekly    |                         | 57.5             | 10.5     | 69    | 8.1                | 0.8        | 26.1             | 3.6      | 8.9                          |                            |                                      |                            | Biguanide and/or sulphonylurea                                                                                       |
| Araki 2015a           |                    |                        |      |                                |               | Insulin glargine      | Titrated          |                         | 56.1             | 11.3     | 74    | 8                  | 0.9        | 25.9             | 3.9      | 8.8                          |                            |                                      |                            |                                                                                                                      |
| Arechavaleta 2011     | NCT00701090        | 1035                   | 2011 | 7                              | Multinational | Glimpiride            | 1-6 mg daily      |                         | 56.2             | 10.1     | 53.8  | 7.5                | 0.8        | 30.2             | 4.4      | 6.7                          |                            |                                      |                            | Metformin                                                                                                            |
| Arechavaleta 2011     |                    |                        |      |                                |               | Staglipitin           | 100 mg daily      |                         | 56.3             | 9.7      | 55    | 7.5                | 0.7        | 29.7             | 4.5      | 6.8                          |                            |                                      |                            |                                                                                                                      |
| Arjona Ferreira 2013  | NCT00509236        | 129                    | 2013 | 12.4                           | Multinational | Glipizide             | 2.5-20 mg daily   | Dialysis                | 58.5             | 9.9      | 56.9  | 7.8                | 0.7        | 26.3             | 4.3      |                              |                            |                                      |                            | None                                                                                                                 |
| Arjona Ferreira 2013  |                    |                        |      |                                |               | Staglipitin           | 25 mg daily       |                         | 60.5             | 9.1      | 62.5  | 7.9                | 0.7        | 27.3             | 5.7      |                              |                            |                                      |                            | 27.7                                                                                                                 |
| Arjona Ferreira 2013  | NCT00509262        | 423                    | 2013 | 12.4                           | Multinational | Glipizide             | 2.5-20 mg daily   | Chronic kidney disease  | 64.3             | 9.2      | 54.9  | 7.8                | 0.7        | 27               | 4.8      | 10.1                         |                            |                                      |                            | None                                                                                                                 |
| Arjona Ferreira 2013a |                    |                        |      |                                |               | Staglipitin           | 25-50 mg daily    |                         | 64.8             | 10.6     | 59.3  | 7.8                | 0.7        | 26.5             | 4.8      | 10.7                         |                            |                                      |                            |                                                                                                                      |
| Arturi 2017           | Not provided       | 32                     | 2017 | 12                             | Italy         | Insulin glargine      | Titrated          | Heart failure           | 60               |          | 75    | 7.9                |            |                  | 30.8     |                              |                            |                                      |                            | Metformin +/- sulfonylurea                                                                                           |
| Arturi 2017           |                    |                        |      |                                |               | Staglipitin           | 100 mg daily      |                         | 60.5             |          | 60    | 8.3                |            |                  | 30.9     |                              |                            |                                      |                            |                                                                                                                      |
| Arturi 2017           |                    |                        |      |                                |               | Liraglutide           | 1.8 mg daily      |                         | 59.5             |          | 70    | 8.2                |            |                  | 33.2     |                              |                            |                                      |                            |                                                                                                                      |
| Asian Acarbose Study  | Not provided       | 121                    | 1998 | 5.5                            | Multinational | Acarbose              | 300 mg daily      |                         | 54               | 10       | 51.6  | 8.6                | 1.1        | 25.6             | 3.8      | 2.1                          |                            |                                      |                            | None                                                                                                                 |
| Asian Acarbose Study  |                    |                        |      |                                |               | Placebo               |                   |                         | 52.8             | 10.2     | 51.6  | 8.2                | 1          | 25.4             | 3.9      | 2.7                          |                            |                                      |                            |                                                                                                                      |
| Aso 2019              | Not provided       | 57                     | 2019 | 5.5                            | Unclear       | Daagliflozin          | 5 mg daily        |                         |                  |          |       |                    |            |                  |          |                              |                            |                                      |                            | Unclear                                                                                                              |
| Aso 2019              |                    |                        |      |                                |               | Control               |                   |                         |                  |          |       |                    |            |                  |          |                              |                            |                                      |                            |                                                                                                                      |
| Avilés-Santa 1999     | Not provided       | 43                     | 1999 | 5.5                            | USA           | Metformin             | 2000 mg daily     |                         | 53.1             | 9.4      | 28.6  | 9                  | 1.4        |                  |          | 9.2                          |                            |                                      |                            | Insulin                                                                                                              |
| Avilés-Santa 1999     |                    |                        |      |                                |               | Placebo               |                   |                         | 54.6             | 7.8      | 45.5  | 9.1                | 1.5        |                  |          | 10.1                         |                            |                                      |                            |                                                                                                                      |
| AWARD-1               | NCT01064687        | 976                    | 2014 | 6                              | Multinational | Exenatide             | 10-20 mcg daily   |                         | 55               | 10       | 57    | 8.1                | 1.3        | 34               | 5        | 9                            |                            |                                      |                            | Metformin + thiazolidinedione                                                                                        |
| AWARD-1               |                    |                        |      |                                |               | Dulaglutide           | 1.5 mg weekly     |                         | 56               | 10       | 58    | 8.1                | 1.3        | 33               | 5        | 9                            |                            |                                      |                            |                                                                                                                      |
| AWARD-1               |                    |                        |      |                                |               | Dulaglutide           | 0.75 mg weekly    |                         | 56               | 9        | 60    | 8.1                | 1.2        | 33               | 6        | 9                            |                            |                                      |                            |                                                                                                                      |
| AWARD-1               |                    |                        |      |                                |               | Placebo               |                   |                         | 55               | 10       | 59    | 8.1                | 1.3        | 33               | 6        | 9                            |                            |                                      |                            |                                                                                                                      |
| AWARD-2               | NCT01075282        | 807                    | 2015 | 17.7                           | Multinational | Dulaglutide           | 1.5 mg weekly     |                         | 56               | 10       | 53    | 8.2                | 1          | 31               | 5        | 9                            |                            |                                      |                            | Metformin + sulfonylurea                                                                                             |
| AWARD-2               |                    |                        |      |                                |               | Dulaglutide           | 0.75 mg weekly    |                         | 57               | 9        | 50    | 8.1                | 1          | 32               | 5        | 9                            |                            |                                      |                            |                                                                                                                      |
| AWARD-2               |                    |                        |      |                                |               | Insulin glargine      | Titrated          |                         | 57               | 9        | 52    | 8.1                | 1          | 32               | 6        | 9                            |                            |                                      |                            |                                                                                                                      |
| AWARD-3               | NCT01126580        | 807                    | 2014 | 12                             | Multinational | Metformin             | 2000 mg daily     |                         | 55               | 10       | 45    | 7.6                | 0.8        | 33               | 5        | 3                            |                            |                                      |                            | None                                                                                                                 |
| AWARD-3               |                    |                        |      |                                |               | Dulaglutide           | 1.5 mg weekly     |                         | 56               | 10       | 42    | 7.6                | 0.9        | 34               | 6        | 3                            |                            |                                      |                            |                                                                                                                      |



| Study ID           | Year           | Country | Study Type | Intervention | Comparator        | Population                    | Primary Outcome          | Secondary Outcome | Other Outcomes |      |      |      |       |      |      |       |                                                                         |                                                                       |                                               |
|--------------------|----------------|---------|------------|--------------|-------------------|-------------------------------|--------------------------|-------------------|----------------|------|------|------|-------|------|------|-------|-------------------------------------------------------------------------|-----------------------------------------------------------------------|-----------------------------------------------|
| Casner 1988        |                |         |            | Placebo      |                   |                               | 10.1                     | 0.43              |                |      |      |      |       |      |      |       |                                                                         |                                                                       |                                               |
| Cefalu 2015        | NCT01031680    | 922     | 2015       | 12           | Multinational     | Daapagliflozin 10 mg daily    | High cardiovascular risk | 62.8              | 7              | 67.9 | 8.18 | 0.84 | 32.6  | 5.9  | 12.6 | 100   | Drugs excluding thiazolidinedione                                       |                                                                       |                                               |
| Cefalu 2015        |                |         |            |              |                   | Placebo                       |                          | 63                | 7.7            | 67.9 | 8.09 | 0.8  | 32.9  | 6.1  | 12.3 | 100   |                                                                         |                                                                       |                                               |
| Chcra 2017         | NCT01698775    | 213     | 2017       | 5.5          | Multinational     | Omgargliptin 12.5-25 mg daily | Chronic kidney disease   | 65.9              | 9.4            | 63.6 | 8.3  | 0.8  | 29.4  | 4.5  | 14.9 |       | None, 1 or 2 oral agents                                                |                                                                       |                                               |
| Chcra 2017         |                |         |            |              |                   | Placebo                       |                          | 64.5              | 9.7            | 59.4 | 8.3  | 0.8  | 30.7  | 6.8  | 15.1 |       |                                                                         |                                                                       |                                               |
| Chakraborty 2011   | Not provided   | 208     | 2011       | 5.5          | India             | Metformin 850-2000 mg daily   |                          |                   |                | 55.5 | 8.7  | 1.4  | 27    | 2.4  |      |       | None                                                                    |                                                                       |                                               |
| Chakraborty 2011   |                |         |            |              |                   | Placebo                       |                          |                   |                | 46   | 8.7  | 1.5  | 27    | 1.3  |      |       |                                                                         |                                                                       |                                               |
| Charbonnel 2013    | NCT01296412    | 653     | 2013       | 6            | Multinational     | Staglipitin 100 mg daily      |                          | 56.9              | 10             | 55   | 8.2  | 1.1  | 32.6  | 5.9  |      |       | Metformin                                                               |                                                                       |                                               |
| Charbonnel 2013    |                |         |            |              |                   | Iraglutide 0.6-1.2 mg daily   |                          | 57.6              | 10.8           | 55   | 8.1  | 0.9  | 32.7  | 6.1  |      |       |                                                                         |                                                                       |                                               |
| Charpentier 2009   | Not provided   | 299     | 2009       | 7            | France            | Pioglitazone 30-45 mg daily   |                          | 59.2              | 9.6            | 66.2 | 8.2  | 0.6  | 29.2  | 3.1  | 12.1 |       | Metformin + sulfonylurea or metglitide                                  |                                                                       |                                               |
| Charpentier 2009   |                |         |            |              |                   | Placebo                       |                          | 60.2              | 9.3            | 64.6 | 8.1  | 0.7  | 29.1  | 3.3  | 12.5 |       |                                                                         |                                                                       |                                               |
| Charpentier 2017   | Not provided   | 359     | 2017       | 6            | Multinational     | Metformin 1000 mg daily       |                          |                   |                |      |      |      |       |      |      |       | None                                                                    |                                                                       |                                               |
| Charpentier 2017   |                |         |            |              |                   | Glimepiride 4 mg daily        |                          |                   |                |      |      |      |       |      |      |       |                                                                         |                                                                       |                                               |
| Chavez 2015        | Not provided   | 21      | 2015       | 5.5          | Unclear           | Pioglitazone 45 mg daily      |                          |                   |                |      |      |      |       |      |      |       | None                                                                    |                                                                       |                                               |
| Chavez 2015        |                |         |            |              |                   | Exenatide 20 mcg daily        |                          |                   |                |      |      |      |       |      |      |       |                                                                         |                                                                       |                                               |
| Chen 2015          | NCT01144239    | 399     | 2015       | 5.5          | Multinational     | Linagliptin 10 mg daily       |                          | 54.6              | 10.1           | 58   | 7.95 | 0.89 | 25.5  | 3.3  |      |       | None                                                                    |                                                                       |                                               |
| Chen 2015          |                |         |            |              |                   | Placebo                       |                          | 54.1              | 9.3            | 59.6 | 8.09 | 0.91 | 25.1  | 3.4  |      |       |                                                                         |                                                                       |                                               |
| Chen 2016          | NCT01175486    | 60      | 2016       | 6            | Taiwan            | Pioglitazone 30 mg daily      |                          | 66.3              | 8.8            | 26.7 | 8.3  | 0.8  | 26    | 3.4  | 11.6 |       | Metformin + sulfonylurea                                                |                                                                       |                                               |
| Chen 2016          |                |         |            |              |                   | Acarbose 150 mg daily         |                          | 67.2              | 7.6            | 30   | 8.2  | 0.8  | 30.1  | 18.4 | 12.3 |       |                                                                         |                                                                       |                                               |
| Chiasson 1994      | Not applicable | 354     | 1994       | 12           | Canada            | Acarbose 600 mg daily         |                          |                   |                |      |      |      |       |      |      |       | Metformin, sulfonylurea, and insulin                                    |                                                                       |                                               |
| Chiasson 1994      |                |         |            |              |                   | Placebo                       |                          |                   |                |      |      |      |       |      |      |       |                                                                         |                                                                       |                                               |
| Chiasson 2001      | Not applicable | 248     | 2001       | 8.3          | Canada            | Metformin 1500 mg daily       |                          | 57.9              | 8.6            | 73.5 | 8.2  | 0.9  | 30.7  | 5.1  | 7.5  |       | None                                                                    |                                                                       |                                               |
| Chiasson 2001      |                |         |            |              |                   | Miglitol 300 mg daily         |                          | 57.3              | 9              | 78   | 8.2  | 0.9  | 31.1  | 4.5  | 5.2  |       |                                                                         |                                                                       |                                               |
| Chiasson 2001      |                |         |            |              |                   | Placebo                       |                          | 57.7              | 9.9            | 67.9 | 8.1  | 0.7  | 31.1  | 4.4  | 5.1  |       |                                                                         |                                                                       |                                               |
| CHICAGO            | NCT0025264     | 462     | 2006       | 18           | USA               | Glimepiride 1-4 mg daily      |                          | 59.9              | 8.2            | 62.7 | 7.4  | 0.97 | 31.9  | 5    | 7.5  | 13.6  | Metformin + sulfonylurea + insulin                                      |                                                                       |                                               |
| CHICAGO            |                |         |            |              |                   | Pioglitazone 15-45 mg daily   |                          | 59.3              | 8              | 63.5 | 7.43 | 0.99 | 32    | 5.2  | 8    | 7.8   |                                                                         |                                                                       |                                               |
| Chien 2011         | Not provided   | 97      | 2011       | 5.5          | Taiwan            | Sitagliptin 100 mg daily      |                          | 73.5              | 5.9            | 36.7 | 9.5  | 1.3  | 26.2  | 2.2  | 13.2 |       | Metformin, sulfonylurea, alpha-glucosidase inhibitors                   |                                                                       |                                               |
| Chien 2011         |                |         |            |              |                   | Standard care                 |                          | 72.5              | 5.2            | 47.9 | 10   | 1.6  | 26    | 2.3  | 14.2 |       |                                                                         |                                                                       |                                               |
| Cho 2019           | UMIN00022804   | 71      | 2019       | 5.5          | Japan             | Pioglitazone 15-30 mg daily   |                          | 58.6              | 10.3           | 54.3 | 6.9  | 0.6  | 28.5  | 4.2  |      | 17.1  | 67.1                                                                    | 26.5                                                                  | Other hypoglycemic agents                     |
| Cho 2019           |                |         |            |              |                   | Daapagliflozin 5 mg daily     |                          | 63.1              | 10             | 63.9 | 6.9  | 0.6  | 28.7  | 6.2  |      | 13.9  | 72.4                                                                    | 22.1                                                                  |                                               |
| Choi 2004          | Not applicable | 55      | 2004       | 6            | Republic of Korea | Rosiglitazone 4 mg daily      | Coronary artery disease  | 60.9              | 9.3            | 63.2 | 7.79 | 1.3  | 24.9  | 2.96 | 7.5  | 100   | Metformin, sulphonylurea, and/or alpha-glucosidase inhibitor or insulin |                                                                       |                                               |
| Choi 2004          |                |         |            |              |                   | Standard care                 |                          | 59.9              | 9.3            | 75.6 | 7.72 | 1.13 | 24.8  | 3.35 | 7.2  | 100   |                                                                         |                                                                       |                                               |
| Chou 2008          | S8-797620/004  | 457     | 2008       | 6.4          | Multinational     | Glimepiride 4 mg daily        |                          | 53                | 11             | 57.7 | 9    | 1.3  | 31.8  | 7.2  |      |       |                                                                         | None                                                                  |                                               |
| Chou 2008          |                |         |            |              |                   | Rosiglitazone 8 mg daily      |                          | 53.6              | 10.7           | 60   | 9.1  | 1.3  | 31.3  | 5.8  |      |       |                                                                         |                                                                       |                                               |
| Chou 2012          | NCT00484198    | 1912    | 2012       | 6            | Multinational     | Rivoglitazone 1.5 mg daily    |                          | 55.1              | 10.59          | 50.9 | 7.7  | 0.57 | 29.6  | 5.27 | 4.3  |       |                                                                         | None                                                                  |                                               |
| Chou 2012          |                |         |            |              |                   | Rivoglitazone 1.0 mg daily    |                          | 55                | 10.51          | 48.2 | 7.7  | 0.53 | 29.7  | 5.63 | 5    |       |                                                                         |                                                                       |                                               |
| Chou 2012          |                |         |            |              |                   | Pioglitazone 45 mg daily      |                          | 55                | 10.84          | 53   | 7.7  | 0.58 | 30    | 5.8  | 4.4  |       |                                                                         |                                                                       |                                               |
| Chou 2012          |                |         |            |              |                   | Placebo                       |                          | 55.4              | 12.32          | 48.9 | 7.7  | 0.54 | 30.1  | 5.43 | 4.9  |       |                                                                         |                                                                       |                                               |
| CIMT               | NCT00657943    | 412     | 2016       | 18           | Denmark           | Metformin 2000 mg daily       |                          | 61                | 8.7            | 68   | 8.6  | 1.1  | 32.3  | 4.2  | 13.5 | 22    | 44                                                                      | Oral drugs + insulin                                                  |                                               |
| CIMT               |                |         |            |              |                   | Placebo                       |                          | 60.3              | 9.1            | 68   | 8.5  | 1    | 32.1  | 4.2  | 12.2 | 27    | 45                                                                      |                                                                       |                                               |
| Chera 2008         | Not provided   | 24      | 2008       | 5.5          | Spain             | Repaglinide 6 mg daily        |                          | 60.3              | 7.7            | 50   | 9.6  | 0.6  | 30.6  | 4.8  | 8    |       |                                                                         | Metformin + insulin                                                   |                                               |
| Chera 2008         |                |         |            |              |                   | Placebo                       |                          | 61.6              | 8.2            | 60   | 9.6  | 0.7  | 27.9  | 5    | 7.9  |       |                                                                         |                                                                       |                                               |
| COMPASS            | UMIN00004716   | 130     | 2013       | 5.5          | Japan             | Pioglitazone 30 mg daily      |                          | 60.7              | 9.5            | 56.1 | 7.4  | 0.61 | 25.8  | 4.8  |      | 87.6  | 80.8                                                                    | Metformin + sulfonylurea                                              |                                               |
| COMPASS            |                |         |            |              |                   | Sitagliptin 100 mg daily      |                          | 60.3              | 7.5            | 62.1 | 7.47 | 0.66 | 24.6  | 3.3  | 88.1 | 100.5 |                                                                         |                                                                       |                                               |
| CompoSIT-I         | NCT02738879    | 746     | 2018       | 7            | Multinational     | Sitagliptin 100 mg daily      |                          | 58.6              | 9.5            | 45.6 | 8.8  | 0.9  | 31.2  | 5.8  | 10.4 |       | 103.7                                                                   | Metformin + DPP-4 inhibitor and/or sulphonylurea                      |                                               |
| CompoSIT-I         |                |         |            |              |                   | Placebo                       |                          | 58.1              | 9.7            | 51.4 | 8.8  | 1.0  | 31.1  | 5.7  | 11.1 |       | 106.4                                                                   |                                                                       |                                               |
| CompoSIT-R         | NCT02532655    | 614     | 2018       | 5            | Multinational     | Sitagliptin 100 mg daily      |                          | 67.7              | 8.5            | 55   | 7.7  | 0.7  | 31.8  | 5.7  | 10.5 |       | 79.4                                                                    | Metformin alone or with sulfonylurea                                  |                                               |
| CompoSIT-R         |                |         |            |              |                   | Daapagliflozin 10 mg daily    |                          | 66.6              | 8.6            | 60.8 | 7.8  | 0.7  | 31.5  | 5.3  | 10.7 |       | 76.9                                                                    |                                                                       |                                               |
| CONFIDENCE         | NCT01147627    | 416     | 2015       | 11           | China             | Pioglitazone 30-45 mg daily   |                          | 50                | 9.3            | 61   | 8    | 1.2  | 25.8  | 3.5  |      |       |                                                                         | None                                                                  |                                               |
| CONFIDENCE         |                |         |            |              |                   | Exenatide 10-20 mcg daily     |                          | 50                | 9.5            | 69   | 8    | 1.2  | 26.1  | 3.6  |      |       |                                                                         |                                                                       |                                               |
| CONFIDENCE         |                |         |            |              |                   | Premixed isproins/Titrated    |                          | 51                | 8.4            | 61.6 | 8.1  | 1.2  | 25.6  | 3.5  |      |       |                                                                         |                                                                       |                                               |
| Coniff 1994        | Not applicable | 189     | 1994       | 8.4          | USA               | Acarbose 900 mg daily         |                          | 56                | 9.5            | 45   | 6.78 |      | 32    |      | 4    |       |                                                                         | None                                                                  |                                               |
| Coniff 1994        |                |         |            |              |                   | Placebo                       |                          | 55.6              | 9.9            | 54   | 6.65 |      | 31.5  |      | 3    |       |                                                                         |                                                                       |                                               |
| Coniff 1995        | Not applicable | 129     | 1995       | 5.5          | USA               | Acarbose 600 mg daily         |                          | 56.2              | 9              | 39   | 6.88 |      | 29.7  |      | 5.1  |       |                                                                         | None                                                                  |                                               |
| Coniff 1995        |                |         |            |              |                   | Placebo                       |                          | 55.8              | 8.6            | 52   | 7.1  |      | 29.9  |      | 5.5  |       |                                                                         |                                                                       |                                               |
| Coniff 1995a       | Not applicable | 207     | 1995       | 8.4          | USA               | Acarbose 900 mg daily         |                          |                   |                |      |      |      |       |      |      |       |                                                                         | Insulin                                                               |                                               |
| Coniff 1995a       |                |         |            |              |                   | Placebo                       |                          |                   |                |      |      |      |       |      |      |       |                                                                         |                                                                       |                                               |
| Costa 1997         | Not applicable | 65      | 1997       | 6            | Spain             | Acarbose 300 mg daily         |                          | 60.2              | 8.4            | 33.3 | 9    | 1.2  | 28.7  | 4.2  |      |       |                                                                         | None                                                                  |                                               |
| Costa 1997         |                |         |            |              |                   | Placebo                       |                          | 61.7              | 9.69           | 31   | 8.8  | 0.54 | 27.4  | 3.23 |      |       |                                                                         |                                                                       |                                               |
| CREDENCE           | NCT02065791    | 4401    | 2019       | 31.4         | Multinational     | Canagliflozin 100 mg daily    | Chronic kidney disease   | 62.9              | 9.2            | 65.4 | 8.3  | 1.3  | 31.4  | 6.2  | 15.5 | 50.5  | 56.3                                                                    | 923                                                                   | Background therapy consistent with guidelines |
| CREDENCE           |                |         |            |              |                   | Placebo                       |                          | 63.2              | 9.2            | 66.7 | 8.3  | 1.3  | 31.3  | 6.2  | 16   | 50.3  | 56                                                                      | 931                                                                   |                                               |
| Cusi 2019          | NCT02009488    | 56      | 2019       | 5.5          | USA               | Canagliflozin 300 mg daily    |                          | 58                | 9              | 62   | 7.6  | 0.8  | 32.2  | 4.1  |      |       | 92                                                                      | Metformin + DPP-4 inhibitor                                           |                                               |
| Cusi 2019          |                |         |            |              |                   | Placebo                       |                          | 58                | 11             | 70   | 7.7  | 0.7  | 31    | 4.9  |      | 89    |                                                                         |                                                                       |                                               |
| CV181-011          | NCT02126441    | 401     | 2009       | 5.5          | Multinational     | Savagipitin 10 mg daily       |                          | 52.72             | 11.27          | 45.9 | 7.8  | 0.9  | 31.71 | 4.71 | 2.3  |       |                                                                         | None                                                                  |                                               |
| CV181-011          |                |         |            |              |                   | Savagipitin 5 mg daily        |                          | 53.91             | 11.57          | 50.9 | 8    | 1.1  | 32.24 | 4.5  | 2.5  |       |                                                                         |                                                                       |                                               |
| CV181-011          |                |         |            |              |                   | Savagipitin 2.5 mg daily      |                          | 53.27             | 10.06          | 56.9 | 7.9  | 0.9  | 31.9  |      | 3.1  |       |                                                                         |                                                                       |                                               |
| CV181-011          |                |         |            |              |                   | Placebo                       |                          | 53.91             | 12.3           | 49.5 | 7.9  | 0.9  | 31.7  |      | 2.3  |       |                                                                         |                                                                       |                                               |
| CV181-013          | NCT0295633     | 565     | 2011       | 17.5         | Multinational     | Savagipitin 5 mg daily        |                          | 53.2              | 10.6           | 47.8 | 8.4  | 1.1  | 29.8  | 5.3  |      |       |                                                                         | Thiazolidinedione                                                     |                                               |
| CV181-013          |                |         |            |              |                   | Savagipitin 2.5 mg daily      |                          | 54.9              | 9.7            | 54.4 | 8.3  | 1.1  | 30    | 5.8  | 5.3  |       |                                                                         |                                                                       |                                               |
| CV181-013          |                |         |            |              |                   | Placebo                       |                          | 54                | 10.1           | 46.2 | 8.2  | 1.1  | 30.3  | 5.8  | 5.2  |       |                                                                         |                                                                       |                                               |
| CV181-039          | NCT00327015    | 971     | 2011       | 18           | Multinational     | Savagipitin 10 mg daily       |                          | 52.1              | 11.6           | 45.2 | 9.5  | 1.2  | 30.4  | 4.9  | 1.4  |       |                                                                         | Metformin                                                             |                                               |
| CV181-039          |                |         |            |              |                   | Savagipitin 5 mg daily        |                          | 52                | 10.4           | 51.6 | 9.4  | 1.2  | 29.9  | 4.5  | 2    |       |                                                                         |                                                                       |                                               |
| CV181-039          |                |         |            |              |                   | Placebo                       |                          | 51.8              | 10.7           | 49.7 | 9.4  | 1.3  | 30.2  | 4.9  | 1.7  |       |                                                                         |                                                                       |                                               |
| da Silva 2016      | NCT02607410    | 35      | 2016       | 12           | Brazil            | Sitagliptin 100 mg daily      |                          | 55.1              | 6.7            | 50   | 8    | 0.6  | 26.5  | 2.7  | 10.9 |       |                                                                         | Metformin + sulfonylurea                                              |                                               |
| da Silva 2016      |                |         |            |              |                   | Insulin NPH                   |                          | 58.4              | 6.9            | 35   | 8.1  | 0.7  | 27.5  | 2.5  | 10.9 |       |                                                                         |                                                                       |                                               |
| Dalry 2004         | Not applicable | 365     | 2004       | 5.5          | USA               | Rosiglitazone 4-8 mg daily    |                          | 57                | 9              | 58   | 8.1  | 0.9  | 32    | 5    | 9    |       |                                                                         | Metformin + sulfonylurea                                              |                                               |
| Dalry 2004         |                |         |            |              |                   | Placebo                       |                          | 57                | 10             | 61   | 8.1  | 0.8  | 32    | 5    | 9    |       |                                                                         |                                                                       |                                               |
| Daapagliflozin 006 | NCT00673231    | 807     | 2012       | 11           | Multinational     | Daapagliflozin 10 mg daily    |                          | 59.3              | 8.8            | 44.8 | 8.57 | 0.82 | 33.4  | 5.1  | 14.2 |       |                                                                         | Insulin                                                               |                                               |
| Daapagliflozin 006 |                |         |            |              |                   | Daapagliflozin 5 mg daily     |                          | 59.3              | 7.9            | 47.4 | 8.62 | 0.89 | 33    | 5.3  | 13.1 |       |                                                                         |                                                                       |                                               |
| Daapagliflozin 006 |                |         |            |              |                   | Daapagliflozin 2.5 mg daily   |                          | 59.8              | 7.6            | 49.5 | 8.46 | 0.78 | 33    | 5    | 13.6 |       |                                                                         |                                                                       |                                               |
| Daapagliflozin 006 |                |         |            |              |                   | Placebo                       |                          | 58.8              | 8.6            | 49.2 | 8.47 | 0.77 | 33.1  | 5.9  | 13.5 |       |                                                                         |                                                                       |                                               |
| DAPA-HF            | NCT03036124    | 2139    | 2019       | 24           | Multinational     | Daapagliflozin 10 mg daily    | Heart failure            | 66.3              | 9.9            | 77.7 | 7.4  | 1.5  | 29.3  | 5.9  | 100  | 64    |                                                                         | Glucose lowering treatment                                            |                                               |
| DAPA-HF            |                |         |            |              |                   | Placebo                       |                          | 66.7              | 9.8            | 77.7 | 7.4  | 1.6  | 29.4  | 6.1  | 100  | 63    |                                                                         |                                                                       |                                               |
| Darig 2007         | GSK 49653/211  | 224     | 2007       | 12           | Europe            | Rosiglitazone 4-8 mg daily    | Heart failure            | 64.3              | 8.8            | 84.3 | 7.8  | 1.3  | 28.8  | 3.7  | 4.5  | 100   |                                                                         | Antidiabetes treatment except thiazolidinedione or insulin + acarbose |                                               |
| Darig 2007         |                |         |            |              |                   | Placebo                       |                          | 63.9              | 8.6            | 79.1 | 7.8  | 1.3  | 28.6  | 3.5  | 100  |       |                                                                         |                                                                       |                                               |
| Davidson 2007      | Not provided   | 245     | 2007       | 5.5          | USA               | Rosiglitazone 8 mg daily      |                          | 52                | 11.9           | 45.3 | 9.2  | 1.3  | 31.3  | 5.7  | 6    |       |                                                                         | Sulfonylurea                                                          |                                               |
| Davidson 2007      |                |         |            |              |                   | Placebo                       |                          | 53                | 10.4           | 48.3 | 9.4  | 1.4  | 31.9  | 5.6  | 6.2  |       |                                                                         |                                                                       |                                               |
| Davies 2013        | NCT01003184    | 216     | 2013       | 5.5          | United            | Exenatide 2 mg weekly         |                          |                   |                |      | 8.37 | 0.85 | 33.7  | 4.7  |      |       |                                                                         | Metformin + sulfonylurea                                              |                                               |
| Davies 2013        |                |         |            |              |                   | Insulin detemir Titrated      |                          |                   |                |      | 8.3  |      |       |      |      |       |                                                                         |                                                                       |                                               |

|                |                |      |      |      |                 |                  |                    |                        |      |       |      |      |      |           |      |       |    |           |                                                                                             |                                        |
|----------------|----------------|------|------|------|-----------------|------------------|--------------------|------------------------|------|-------|------|------|------|-----------|------|-------|----|-----------|---------------------------------------------------------------------------------------------|----------------------------------------|
| Dei Cas 2017   |                |      |      |      |                 |                  | Vildagliptin       | 100 mg daily           |      | 61    | 9    | 65   | 7.7  | 29        | 7    |       |    |           |                                                                                             |                                        |
| Dejager 2007   | NCT0099905     | 632  | 2007 | 5.5  | Multinational   | Vildagliptin     | 100 mg daily       |                        | 53.6 | 10.8  | 53.3 | 8.4  | 0.8  | 32.4      | 6.1  | 2.4   |    | None      |                                                                                             |                                        |
| Dejager 2007   |                |      |      |      |                 | Vildagliptin     | 100 mg daily       |                        | 52.8 | 9.6   | 46.7 | 8.6  | 0.8  | 33.9      | 4.8  | 2.1   |    |           |                                                                                             |                                        |
| Dejager 2007   |                |      |      |      |                 | Vildagliptin     | 50 mg daily        |                        | 55.3 | 11.4  | 41.3 | 8.2  | 0.8  | 32.9      | 6    | 2.1   |    |           |                                                                                             |                                        |
| Dejager 2007   |                |      |      |      |                 | Placebo          |                    |                        | 52.2 | 11.2  | 47.9 | 8.4  | 0.8  | 32.6      | 5.6  | 1.6   |    |           |                                                                                             |                                        |
| Del Prato 2003 | Not applicable | 428  | 2003 | 6    | Multinational   | Metformin        | 2550 mg daily      |                        | 56   | 9     | 59   | 7.79 | 1.61 | 29.7      | 4.2  |       |    | None      |                                                                                             |                                        |
| Del Prato 2003 |                |      |      |      |                 | Placebo          |                    |                        | 56   | 9     | 63   | 7.43 |      | 29.9      | 3.9  |       |    |           |                                                                                             |                                        |
| Del Prato 2011 | Not provided   | 503  | 2011 | 5.5  | Multinational   | Liraglutide      | 5 mg daily         |                        | 56.4 | 10.1  | 48.8 | 8    | 0.9  | 29.04     | 4.8  |       |    | None      |                                                                                             |                                        |
| Del Prato 2011 |                |      |      |      |                 | Placebo          |                    |                        | 54.4 | 10.3  | 47.3 | 8    | 0.9  | 29.1      | 4.8  |       |    |           |                                                                                             |                                        |
| Del Prato 2014 | NCT00856284    | 2639 | 2014 | 24   | Multinational   | Glipizide        | 5 mg daily         |                        | 55.4 | 9.6   | 50.5 | 7.6  | 0.62 | 31.1      | 5.32 |       |    | Metformin |                                                                                             |                                        |
| Del Prato 2014 |                |      |      |      |                 | Alloglutin       | 25 mg daily        |                        | 55.5 | 9.81  | 51.1 | 7.6  | 0.6  | 31.3      | 5.34 |       |    |           |                                                                                             |                                        |
| Del Prato 2014 |                |      |      |      |                 | Alloglutin       | 12.5 mg daily      |                        | 55.6 | 9.6   | 47.6 | 7.6  | 0.6  | 31.3      | 4.2  |       |    |           |                                                                                             |                                        |
| DELIGHT        | NCT02547935    | 293  | 2018 | 5.5  | Multinational   | Dapagliflozin    | 10 mg daily        | Chronic kidney disease | 64.7 | 8.6   | 70   | 8.44 | 1    | 30.19     | 5.3  | 17.55 | 40 | 270       | Stable glucose-lowering therapy                                                             |                                        |
| DELIGHT        |                |      |      |      |                 | Placebo          |                    |                        | 64.7 | 8.5   | 71   | 8.57 | 1.2  | 30.34     | 5.6  | 17.71 | 28 | 257.5     |                                                                                             |                                        |
| Deng 2017      | Not provided   | 72   | 2017 | 12   | China           | Staglitpin       | 100 mg daily       |                        | 63.7 | 10.7  | 77.8 | 7.3  | 0.7  |           |      |       |    |           | None                                                                                        |                                        |
| Deng 2017      |                |      |      |      |                 | Standard care    |                    |                        | 64.1 | 11.2  | 72.2 | 7.4  | 0.8  |           |      |       |    |           |                                                                                             |                                        |
| DERIVE         | NCT02413398    | 321  | 2019 | 5.5  | Multinational   | Dapagliflozin    | 10 mg daily        | Chronic kidney disease | 65.3 | 10.6  | 56.9 | 8.33 | 1.08 | 32.6      | 4.7  | 14.3  |    | 53.3      | 23.5                                                                                        | Stable glucose-lowering therapy        |
| DERIVE         |                |      |      |      |                 | Placebo          |                    |                        | 66.2 | 10.6  | 56.5 | 8.03 | 1.08 | 31.6      | 5    | 14.5  |    | 53.6      | 29                                                                                          |                                        |
| Derosa 2003    | Not applicable | 124  | 2003 | 6    | Italy           | Glimepiride      | 1 mg daily         |                        | 54   | 10    | 48.4 | 7.8  | 1.2  | 26.4      | 7.9  |       |    |           | None                                                                                        |                                        |
| Derosa 2003    |                |      |      |      |                 | Repaglinide      | 1 mg daily         |                        | 56   | 9     | 50   | 8    | 1.2  | 26.12     | 9.45 |       |    |           |                                                                                             |                                        |
| Derosa 2003a   | Not applicable | 112  | 2003 | 12   | Italy           | Metformin        | 1500-2500 mg daily |                        | 52   | 9     | 48.2 | 7.4  | 0.9  | 28.7      | 1.2  |       |    |           | None                                                                                        |                                        |
| Derosa 2003a   |                |      |      |      |                 | Repaglinide      | 2-4 mg daily       |                        | 55   | 10    | 51.8 | 7.6  | 0.9  | 25.2      | 1.1  |       |    |           |                                                                                             |                                        |
| Derosa 2004    | Not applicable | 164  | 2004 | 12   | Italy           | Metformin        | 3000 mg daily      |                        |      |       |      |      |      |           |      |       |    |           | None                                                                                        |                                        |
| Derosa 2004    |                |      |      |      |                 | Glimepiride      | 4 mg daily         |                        |      |       |      |      |      |           |      |       |    |           |                                                                                             |                                        |
| Derosa 2005    | Not applicable | 95   | 2005 | 12   | Italy           | Glimepiride      | 2 mg daily         |                        | 52   | 5     | 48.9 | 7.9  | 0.6  | 16.8      | 1.5  | 4     |    |           | Metformin                                                                                   |                                        |
| Derosa 2005    |                |      |      |      |                 | Rosiglitazone    | 4 mg daily         |                        | 54   | 4     | 52.1 | 8    | 0.7  | 26.6      | 1.3  | 5     |    |           |                                                                                             |                                        |
| Derosa 2007    | Not provided   | 248  | 2007 | 6    | Italy           | Glibenclamide    | 12.5 mg daily      |                        | 56   | 4     | 50.9 | 8.2  | 1.1  | 26.5      | 1.5  | 4     |    |           | Metformin                                                                                   |                                        |
| Derosa 2007    |                |      |      |      |                 | Nateglinide      | 300 mg daily       |                        | 55   | 5     | 48.7 | 8.1  | 1    | 26.4      | 1.4  | 5     |    |           |                                                                                             |                                        |
| Derosa 2009    | Not provided   | 350  | 2009 | 6    | Italy           | Pioglitazone     | 45 mg daily        |                        | 55   | 6     | 49.1 | 7.9  | 0.5  | 28.18     | 0.6  |       |    |           | Oral hypoglycaemic agents                                                                   |                                        |
| Derosa 2009    |                |      |      |      |                 | Acarbose         | 300 mg daily       |                        | 57   | 6     | 49.7 | 8    | 0.6  | 26.97     | 0.8  |       |    |           |                                                                                             |                                        |
| Derosa 2009a   | Not provided   | 271  | 2009 | 15   | Italy           | Metformin        | 3000 mg daily      |                        | 55   | 5     | 50.7 | 9.1  | 1.2  | 27.2      | 1.5  |       |    |           | None                                                                                        |                                        |
| Derosa 2009a   |                |      |      |      |                 | Pioglitazone     | 45 mg daily        |                        | 54   | 6     | 46.3 | 9.2  | 1.3  | 27.5      | 1.7  |       |    |           |                                                                                             |                                        |
| Derosa 2009a   |                |      |      |      |                 | Glimepiride      | 6 mg daily         |                        | 57.7 | 7     | 48.5 | 9    | 1    | 27.1      | 1.4  |       |    |           | Metformin                                                                                   |                                        |
| Derosa 2009a   |                |      |      |      |                 | Pioglitazone     | 45 mg daily        |                        | 57   | 7     | 49.3 | 9.3  | 1.4  | 27.4      | 1.6  |       |    |           |                                                                                             |                                        |
| Derosa 2010    | Not provided   | 151  | 2010 | 12   | Italy           | Metformin        | 1700 mg daily      |                        | 58   | 6     | 51.3 | 8.4  | 0.8  | 27.7      | 1.3  | 6     |    |           | Pioglitazone                                                                                |                                        |
| Derosa 2010    |                |      |      |      |                 | Staglitpin       | 100 mg daily       |                        | 57   | 5     | 49.3 | 8.5  | 0.9  | 27.9      | 1.5  | 5     |    |           |                                                                                             |                                        |
| Derosa 2010a   | Not provided   | 128  | 2010 | 12   | Italy           | Glibenclamide    | 15 mg daily        |                        | 56   | 7     | 50.8 | 8.9  | 0.8  | 28.5      | 1.4  |       |    |           | Metformin                                                                                   |                                        |
| Derosa 2010a   |                |      |      |      |                 | Exenatide        | 20 mcg daily       |                        | 57   | 8     | 47.6 | 8.8  | 0.7  | 28.7      | 1.5  |       |    |           |                                                                                             |                                        |
| Derosa 2011    | Not provided   | 188  | 2011 | 7    | Italy           | Acarbose         | 300 mg daily       |                        |      |       | 48.9 | 6.8  | 0.6  | 26.6      | 0.8  |       |    |           | None                                                                                        |                                        |
| Derosa 2011    |                |      |      |      |                 | Placebo          |                    |                        |      |       | 48.9 | 6.7  | 0.5  | 26.8      | 0.9  |       |    |           |                                                                                             |                                        |
| Derosa 2011a   | Not provided   | 111  | 2011 | 12   | Italy           | Glimepiride      | 6 mg daily         |                        | 55   | 6     | 48.1 | 8.8  | 0.8  | 28.5      | 1.4  |       |    |           | Metformin                                                                                   |                                        |
| Derosa 2011a   |                |      |      |      |                 | Exenatide        | 20 mcg daily       |                        | 56.2 | 7     | 49.1 | 8.7  | 0.7  | 28.4      | 1.3  |       |    |           |                                                                                             |                                        |
| Derosa 2012    | Not provided   | 178  | 2012 | 12   | Italy           | Staglitpin       | 100 mg daily       |                        | 55.9 | 8.8   | 46   | 8.1  | 0.8  | 28.1      | 1.2  |       |    |           | Metformin                                                                                   |                                        |
| Derosa 2012    |                |      |      |      |                 | Placebo          |                    |                        | 54.8 | 7.9   | 50.6 | 8    | 0.7  | 28.9      | 2    |       |    |           |                                                                                             |                                        |
| Derosa 2012a   | Not provided   | 167  | 2012 | 12   | Italy           | Vildagliptin     | 100 mg daily       |                        | 54.2 | 8.3   | 50   | 8.1  | 0.6  | 27.9      | 1.5  | 6.1   |    |           | Metformin                                                                                   |                                        |
| Derosa 2012a   |                |      |      |      |                 | Placebo          |                    |                        | 52.4 | 7.1   | 51.8 | 8.2  | 0.7  | 27.8      | 1.4  | 6.3   |    |           |                                                                                             |                                        |
| Derosa 2013    | Not provided   | 171  | 2013 | 12   | Italy           | Exenatide        | 20 mcg daily       |                        | 50   | 50    | 8.1  | 0.8  | 31.9 | 1.7       |      |       |    |           | 98.2                                                                                        | Metformin                              |
| Derosa 2013    |                |      |      |      |                 | Placebo          |                    |                        | 48.2 | 7.9   | 0.6  | 31.7 | 1.5  |           |      |       |    |           | 93.6                                                                                        |                                        |
| Derosa 2014    | Not provided   | 167  | 2014 | 5.5  | Italy           | Glimepiride      | 6 mg daily         |                        | 57.2 | 9     | 49.4 | 7.7  | 0.7  | 27.6      | 1.3  | 0.57  |    |           | Metformin                                                                                   |                                        |
| Derosa 2014    |                |      |      |      |                 | Vildagliptin     | 100 mg daily       |                        | 59.8 | 9.9   | 48.8 | 7.9  | 0.9  | 27.9      | 1.6  | 0.58  |    |           |                                                                                             |                                        |
| Derosa 2014a   | Not provided   | 205  | 2014 | 24   | Italy           | Vildagliptin     | 100 mg daily       |                        | 57   | 9     | 49   | 8    | 0.8  | 29.2      | 3.1  |       |    |           | Oral antidiabetic drugs                                                                     |                                        |
| Derosa 2014a   |                |      |      |      |                 | Placebo          |                    |                        | 48.5 | 8.1   | 0.9  | 29.4 | 3.2  |           |      |       |    |           |                                                                                             |                                        |
| DIA3004        | NCT01064414    | 269  | 2014 | 12   | Multinational   | Canagliflozin    | 300 mg daily       | Chronic kidney disease | 67.9 | 8.2   | 53.9 | 8    | 0.8  | 33.4      | 6.5  | 17    |    | 38.5      | 228.1                                                                                       | AHA monotherapy or combination therapy |
| DIA3004        |                |      |      |      |                 | Canagliflozin    | 100 mg daily       |                        | 69.5 | 8.2   | 64.4 | 7.9  | 0.9  | 32.4      | 5.5  | 15.6  |    | 39.7      | 285.9                                                                                       |                                        |
| DIA3004        |                |      |      |      |                 | Placebo          |                    |                        | 68.2 | 8.4   | 63.3 | 8    | 0.9  | 31.4      | 6.5  | 16.4  |    | 40.1      | 255.1                                                                                       |                                        |
| Distiller 2014 | Not provided   | 28   | 2014 | 6    | South Africa    | Exenatide        | 20 mcg daily       |                        | 49.1 | 36-65 | 50   | 8.7  | 41.9 | 33.3-47   | 12.3 |       |    |           |                                                                                             | Metformin + insulin                    |
| Distiller 2014 |                |      |      |      |                 | Standard care    |                    |                        | 54.3 | 41-71 | 50   | 9.2  | 40.2 | 34.5-46.6 | 12.4 |       |    |           |                                                                                             |                                        |
| DIVERSITY-CVR  | UMIN00028014   | 340  | 2020 | 5.5  | Japan           | Staglitpin       | 50-100 mg daily    |                        | 57.9 | 12.1  | 58.3 | 7.8  | 0.8  | 27.9      | 4.2  | 2.5   | 79 |           | Metformin or no treatment                                                                   |                                        |
| DIVERSITY-CVR  |                |      |      |      |                 | Dapagliflozin    | 5-10 mg daily      |                        | 58.3 | 12.4  | 61.9 | 7.8  | 0.8  | 27.8      | 4.0  | 4.2   | 79 |           |                                                                                             |                                        |
| Dobs 2013      | NCT00350779    | 278  | 2013 | 12.4 | Multinational   | Staglitpin       | 100 mg daily       |                        | 54.4 | 8.3   | 56   | 8.8  | 1    | 30.1      | 6.2  | 9.3   |    |           | Metformin + PPAR gamma agonist, metformin + sulfonylurea, sulfonylurea + PPAR gamma agonist |                                        |
| Dobs 2013      |                |      |      |      |                 | Control          |                    |                        | 54.8 | 9.5   | 60   | 8.7  | 1    | 30.8      | 5.6  | 9.4   |    |           |                                                                                             |                                        |
| Dorkhan 2009   | Not provided   | 30   | 2009 | 6    | Sweden          | Pioglitazone     | 45 mg daily        |                        | 60.8 | 7.1   | 73.3 | 8.1  | 1.5  | 30.8      | 5.5  | 11.1  |    |           | Metformin with or without sulfonylurea /meglitinide                                         |                                        |
| Dorkhan 2009   |                |      |      |      |                 | Insulin glargine | Titrated           |                        | 61.5 | 8.2   | 60   | 8.3  | 1.4  | 31.6      | 6.1  | 9.5   |    |           |                                                                                             |                                        |
| Douek 2005     | Not provided   | 183  | 2005 | 12   | United Kingdom  | Metformin        | 2000 mg daily      |                        | 58   | 8.9   | 67.4 | 9.7  | 1.3  | 30.9      | 4.5  | 9     |    |           | Sulfonylurea ± thiazolidinedione                                                            |                                        |
| Douek 2005     |                |      |      |      |                 | Placebo          |                    |                        | 58   | 7.7   | 62.6 | 10   | 1.5  | 31.5      | 4.3  | 10    |    |           |                                                                                             |                                        |
| Drent 2002     | Not applicable | 465  | 2002 | 5.5  | The Netherlands | Miglitol         | 600 mg daily       |                        | 64   | 10    | 63.8 | 8.1  | 1.01 | 26.9      | 3.5  |       |    |           | None                                                                                        |                                        |
| Drent 2002     |                |      |      |      |                 | Miglitol         | 300 mg daily       |                        | 63   | 11    | 52.1 | 8    | 1.21 | 27.8      | 3.2  |       |    |           |                                                                                             |                                        |
| Drent 2002     |                |      |      |      |                 | Miglitol         | 150 mg daily       |                        | 63   | 9     | 56   | 8.09 | 1.23 | 26.6      | 3.2  |       |    |           |                                                                                             |                                        |
| Drent 2002     |                |      |      |      |                 | Miglitol         | 75 mg daily        |                        | 64   | 10    | 48.8 | 8.14 | 1.14 | 27.4      | 3.7  |       |    |           |                                                                                             |                                        |
| Drent 2002     |                |      |      |      |                 | Placebo          |                    |                        | 63   | 11    | 56.3 | 7.94 | 1.15 | 27.2      | 3.4  |       |    |           |                                                                                             |                                        |
| DUAL-I         | NCT01336023    | 829  | 2014 | 6    | Multinational   | Liraglutide      | 1.8 mg daily       |                        | 55   | 10.2  | 50   | 8.3  | 0.9  | 31.3      | 4.8  | 7.2   |    |           | Metformin ± thiazolidinedione                                                               |                                        |
| DUAL-I         |                |      |      |      |                 | Insulin degludec | Titrated           |                        | 54.9 | 9.7   | 48   | 8.3  | 1    | 31.2      | 5.3  | 7     |    |           |                                                                                             |                                        |
| DUAL-I CHINA   | NCT01372494    | 359  | 2020 | 6    | China           | Liraglutide      | 1.8 mg daily       |                        | 54.1 | 10.2  | 60.0 | 8.2  | 0.8  |           |      |       |    |           | Metformin                                                                                   |                                        |
| DUAL-I CHINA   |                |      |      |      |                 | Insulin degludec | Titrated           |                        | 55.7 | 10.2  | 55.9 | 8.3  | 0.8  |           |      |       |    |           |                                                                                             |                                        |
| DUAL-I JAPAN   | NCT02607306    | 544  | 2019 | 12   | Japan           | Liraglutide      | 1.8 mg daily       |                        | 56.8 | 10.1  | 70.3 | 8.3  | 1.0  | 26.5      | 4.5  | 9.4   |    |           | Oral antidiabetic drugs                                                                     |                                        |

|                       |                |       |      |      |                 |               |                     |       |       |      |      |         |       |       |      |      |                                                                         |                     |                                                    |                                                                                           |
|-----------------------|----------------|-------|------|------|-----------------|---------------|---------------------|-------|-------|------|------|---------|-------|-------|------|------|-------------------------------------------------------------------------|---------------------|----------------------------------------------------|-------------------------------------------------------------------------------------------|
| Ebato 2009            |                |       |      |      | Control         |               | 60.5                | 8.2   | 58.3  | 8.33 | 0.73 | 25.7    | 2.4   | 13.1  | 74.5 |      |                                                                         |                     |                                                    |                                                                                           |
| EDIT                  | UMIN00004678   | 50    | 2015 | 5.5  | Japan           | Sitagliptin   | 50 mg daily         | 66    | 8     | 64   | 7.9  | 1       | 24.5  | 2     | 19   | 56   | 64                                                                      | Insulin             |                                                    |                                                                                           |
| EDIT                  |                |       |      |      | Control         |               | 66                  | 13    | 75    | 7.8  | 0.7  | 26.8    | 4.3   | 20    | 46   | 63.9 |                                                                         |                     |                                                    |                                                                                           |
| Efsthathiou 2015      | Not provided   | 66    | 2015 | 5.5  | Greece          | Saxagliptin   | 5 mg daily          |       |       |      |      |         |       |       |      |      | Metformin                                                               |                     |                                                    |                                                                                           |
| Efsthathiou 2015      |                |       |      |      |                 | Dapagliflozin | 10 mg daily         |       |       |      |      |         |       |       |      |      |                                                                         |                     |                                                    |                                                                                           |
| ELEGANT               | NCT01392898    | 50    | 2014 | 12   | The Netherlands | Liraglutide   | 1.8 mg daily        | 57    | 10    | 61.5 | 7.2  | 0.6     | 34    | 7     | 8.3  |      | Antidiabetic medications (metformin, sulfonylurea, insulin)             |                     |                                                    |                                                                                           |
| ELEGANT               |                |       |      |      |                 | Standard care |                     | 59    | 8     | 60   | 7.5  | 0.7     | 32    | 5     | 7.6  |      |                                                                         |                     |                                                    |                                                                                           |
| ELIXA                 | NCT01147250    | 6068  | 2015 | 25   | Multinational   | Lixisenatide  | 10-20 mcg daily     | 59.9  | 9.7   | 69.6 | 7.7  | 1.3     | 30.1  | 5.6   | 9.2  |      | Antidiabetic medications with the exception of other incretin therapies |                     |                                                    |                                                                                           |
| ELIXA                 |                |       |      |      |                 | Placebo       |                     | 60.6  | 9.6   | 69.1 | 7.6  | 1.3     | 30.2  | 5.8   | 9.4  |      |                                                                         |                     |                                                    |                                                                                           |
| ELLENA-IT             | UMIN000027614  | 61    | 2020 | 5.5  | Japan           | Empagliflozin | 10 mg daily         | 66.3  | 9.5   | 67.7 | 8.1  | 0.8     | 25.8  | 3.9   | 19.0 |      | Standard therapy                                                        |                     |                                                    |                                                                                           |
| ELLENA-IT             |                |       |      |      |                 | Liraglutide   | 0.3 mg daily        | 67.2  | 9.0   | 70.0 | 8.0  | 0.8     | 26.4  | 4.6   | 18.8 |      |                                                                         |                     |                                                    |                                                                                           |
| EMBLEM                | UMIN000024502  | 117   | 2019 | 5.5  | Japan           | Empagliflozin | 10 mg daily         | 65    | 11    | 69.2 | 7.2  | 0.8     | 26    | 5     | 14   | 100  | 67                                                                      | Standard therapy    |                                                    |                                                                                           |
| EMBLEM                |                |       |      |      |                 | Placebo       |                     | 64    | 10    | 67.9 | 7.2  | 0.9     | 27    | 6     | 13   | 100  | 69                                                                      |                     |                                                    |                                                                                           |
| EMIT                  | NCT01242215    | 243   | 2015 | 5.5  | Japan           | Ipragliflozin | 50 mg daily         | 59.6  | 10.02 | 67.3 | 8.38 | 0.641   | 25.8  | 3.6   | 10.3 |      | Sulphonylurea                                                           |                     |                                                    |                                                                                           |
| EMIT                  |                |       |      |      |                 | Placebo       |                     | 59.8  | 8.6   | 62.7 | 8.34 | 0.727   | 24.2  | 3     | 10.8 |      |                                                                         |                     |                                                    |                                                                                           |
| EMLIFA001             | NCT02637973    | 84    | 2020 | 5.5  | Germany         | Empagliflozin | 25 mg daily         | 62.7  | 7.0   | 69.0 | 6.7  | 0.7     | 27.1  | 4.6   | 3.0  |      | None                                                                    |                     |                                                    |                                                                                           |
| EMLIFA001             |                |       |      |      |                 | Placebo       |                     | 61.5  | 10.0  | 69.0 | 6.8  | 0.5     | 32.4  | 4.2   | 3.3  |      |                                                                         |                     |                                                    |                                                                                           |
| EMPA-HEART            | NCT01011868    | 97    | 2019 | 6.0  | Canada          | Empagliflozin | 10 mg daily         |       |       | 90.0 | 7.9  | 0.8     | 27.7  | 4.7   |      |      | Stable glucose-lowering therapy                                         |                     |                                                    |                                                                                           |
| EMPA-HEART            |                |       |      |      |                 | Placebo       |                     |       |       | 96.0 | 8.0  | 0.9     | 27.4  | 5.4   |      |      |                                                                         |                     |                                                    |                                                                                           |
| EMPA-REG BASAL        | NCT01011868    | 494   | 2015 | 18   | Multinational   | Empagliflozin | 25 mg daily         | 58.9  | 10.5  | 60   | 8.2  | 0.8     | 32.7  | 5.9   |      |      | Insulin ± metformin ± sulphonylurea                                     |                     |                                                    |                                                                                           |
| EMPA-REG BASAL        |                |       |      |      |                 | Empagliflozin | 10 mg daily         | 58.6  | 9.8   | 55   | 8.3  | 0.8     | 32.1  | 5.8   |      |      |                                                                         |                     |                                                    |                                                                                           |
| EMPA-REG BASAL        |                |       |      |      |                 | Placebo       |                     | 58.1  | 9.4   | 53   | 8.2  | 0.8     | 31.8  | 6     |      |      |                                                                         |                     |                                                    |                                                                                           |
| EMPA-REG H2H-SU       | NCT02998970    | 1549  | 2014 | 24   | Multinational   | Glimepiride   | 1-4 mg daily        | 55.7  | 10.4  | 54   | 7.92 | 0.86    | 30.3  | 5.3   |      | 88.1 | 39.8                                                                    | Metformin           |                                                    |                                                                                           |
| EMPA-REG H2H-SU       |                |       |      |      |                 | Empagliflozin | 25 mg daily         | 56.2  | 10.3  | 56   | 7.92 | 0.81    | 30    | 5.3   |      | 87.9 | 40.7                                                                    |                     |                                                    |                                                                                           |
| EMPA-REG MDI          | NCT01306214    | 563   | 2014 | 12   | Multinational   | Empagliflozin | 25 mg daily         | 58    | 9.4   | 44   | 8.29 | 0.72    | 35    | 4     |      |      |                                                                         | Insulin ± metformin |                                                    |                                                                                           |
| EMPA-REG MDI          |                |       |      |      |                 | Empagliflozin | 10 mg daily         | 56.7  | 8.7   | 52   | 8.39 | 0.74    | 34.7  | 3.8   |      |      |                                                                         | 84.1                |                                                    |                                                                                           |
| EMPA-REG MDI          |                |       |      |      |                 | Placebo       |                     | 55.3  | 10.1  | 40   | 8.33 | 0.72    | 34.7  | 4.3   |      |      |                                                                         | 83.4                |                                                    |                                                                                           |
| EMPA-REG MET          | NCT01159600    | 637   | 2014 | 5.5  | Multinational   | Empagliflozin | 25 mg daily         | 55.6  | 10.2  | 56   | 7.86 | 0.87    | 29.7  | 5.7   |      |      |                                                                         | 87.7                | Metformin                                          |                                                                                           |
| EMPA-REG MET          |                |       |      |      |                 | Empagliflozin | 10 mg daily         | 55.5  | 9.9   | 58   | 7.94 | 0.79    | 29.5  | 5.5   |      |      |                                                                         | 89.5                |                                                    |                                                                                           |
| EMPA-REG MET          |                |       |      |      |                 | Placebo       |                     | 56    | 9.7   | 56   | 7.9  | 0.88    | 28.7  | 5.2   |      |      |                                                                         | 89.7                |                                                    |                                                                                           |
| EMPA-REG METSU        | NCT01159600    | 669   | 2013 | 5.5  | Multinational   | Empagliflozin | 25 mg daily         | 57.4  | 9.3   | 53   | 8.1  | 0.83    | 28.3  | 5.5   |      |      |                                                                         | 88.3                | Metformin + sulfonylurea                           |                                                                                           |
| EMPA-REG METSU        |                |       |      |      |                 | Empagliflozin | 10 mg daily         | 57    | 9.2   | 50   | 8.07 | 0.81    | 28.3  | 5.4   |      |      |                                                                         | 86.5                |                                                    |                                                                                           |
| EMPA-REG METSU        |                |       |      |      |                 | Placebo       |                     | 56.9  | 9.2   | 50   | 8.05 | 0.83    | 27.9  | 4.9   |      |      |                                                                         | 86.9                |                                                    |                                                                                           |
| EMPA-REG MONO         | NCT01177813    | 899   | 2013 | 5.5  | Multinational   | Sitagliptin   | 100 mg daily        | 55.1  | 9.9   | 63   | 7.85 | 0.79    | 28.2  | 4.2   |      |      |                                                                         | 87.6                | None                                               |                                                                                           |
| EMPA-REG MONO         |                |       |      |      |                 | Empagliflozin | 25 mg daily         | 53.8  | 11.6  | 65   | 7.86 | 0.85    | 28.2  | 5.5   |      |      |                                                                         | 87.6                |                                                    |                                                                                           |
| EMPA-REG MONO         |                |       |      |      |                 | Empagliflozin | 10 mg daily         | 56.2  | 11.6  | 63   | 7.87 | 0.88    | 28.3  | 5.5   |      |      |                                                                         | 87.7                |                                                    |                                                                                           |
| EMPA-REG MONO         |                |       |      |      |                 | Placebo       |                     | 54.9  | 10.9  | 54   | 7.91 | 0.78    | 28.7  | 6.2   |      |      |                                                                         | 86.8                |                                                    |                                                                                           |
| EMPA-REG OUTCOME      | NCT01131676    | 7020  | 2015 | 36   | Multinational   | Empagliflozin | 10-25 mg daily      | 63.1  | 8.5   | 71.2 | 8.07 | 0.85    | 30.6  | 5.3   |      | 75.6 |                                                                         | 74.2                | No or stable glucose lowering therapy              |                                                                                           |
| EMPA-REG OUTCOME      |                |       |      |      |                 | Placebo       |                     | 63.2  | 8.8   | 72   | 8.08 | 0.84    | 30.7  | 5.2   |      | 75.6 |                                                                         | 73.8                |                                                    |                                                                                           |
| EMPA-REG PIO          | NCT0120001     | 498   | 2014 | 5.5  | Multinational   | Empagliflozin | 25 mg daily         | 54.2  | 8.9   | 50.6 | 8.1  | 0.82    | 29.1  | 5.5   |      |      |                                                                         | 87.4                | Thiazolidinedione ± metformin                      |                                                                                           |
| EMPA-REG PIO          |                |       |      |      |                 | Empagliflozin | 10 mg daily         | 54.7  | 9.9   | 50.3 | 8.1  | 0.89    | 29.2  | 5.6   |      |      |                                                                         | 84.3                |                                                    |                                                                                           |
| EMPA-REG PIO          |                |       |      |      |                 | Placebo       |                     | 54.6  | 10.5  | 44.2 | 8.2  | 0.7     | 29.2  | 5.3   |      |      |                                                                         | 85.5                |                                                    |                                                                                           |
| EMPA-REG RENAL - CKD2 | NCT01164501    | 741   | 2014 | 12   | Multinational   | Empagliflozin | 25 mg daily         | 62    | 8.4   | 62.9 | 7.96 | 0.73    | 31.3  | 5.8   |      |      |                                                                         | 72.3                | Antidiabetes treatment excluding SGLT-2 inhibitors |                                                                                           |
| EMPA-REG RENAL - CKD2 |                |       |      |      |                 | Empagliflozin | 10 mg daily         | 63.2  | 8.5   | 61.2 | 8.02 | 0.84    | 32.4  | 5.4   |      |      |                                                                         | 70.8                |                                                    |                                                                                           |
| EMPA-REG RENAL - CKD2 |                |       |      |      |                 | Placebo       |                     | 62.6  | 8.1   | 58.9 | 8.09 | 0.8     | 30.8  | 5.6   |      |      |                                                                         | 71.8                |                                                    |                                                                                           |
| EMPA-REG RENAL - CKD3 |                |       |      |      |                 | Empagliflozin | 25 mg daily         | 64.6  | 8.9   | 57.2 | 8.02 | 0.84    | 30.2  | 5.3   |      |      |                                                                         | 45.4                |                                                    |                                                                                           |
| EMPA-REG RENAL - CKD3 |                |       |      |      |                 | Placebo       |                     | 65.1  | 8.2   | 56.7 | 8.09 | 0.8     | 30.3  | 5.3   |      |      |                                                                         | 44.3                |                                                    |                                                                                           |
| EMPA-REG RENAL - CKD4 |                |       |      |      |                 | Empagliflozin | 25 mg daily         | 65.4  | 10.2  | 56.8 | 8.06 | 1.05    | 29    | 4.9   |      |      |                                                                         | 24.4                |                                                    |                                                                                           |
| EMPA-REG RENAL - CKD4 |                |       |      |      |                 | Placebo       |                     | 62.9  | 11.9  | 51.4 | 8.16 | 0.99    | 31.8  | 6     |      |      |                                                                         | 22                  |                                                    |                                                                                           |
| Engelbrechtsen 2016   | NCT02094183    | 42    | 2016 | 12   | Denmark         | Liraglutide   | 1.2 mg daily        | 46    | 2     | 18.5 |      |         |       |       |      |      |                                                                         |                     | None                                               |                                                                                           |
| Engelbrechtsen 2016   |                |       |      |      |                 | Control       |                     | 45    | 2     | 12   |      |         |       |       |      |      |                                                                         |                     |                                                    |                                                                                           |
| Erem 2014             | Not provided   | 57    | 2015 | 12   | Turkey          | Metformin     | 2000 mg daily       | 52.2  | 10.5  | 31.6 | 7.62 | 1.06    | 33.56 | 4.6   |      |      |                                                                         | 10.5                | None                                               |                                                                                           |
| Erem 2014             |                |       |      |      |                 | Gliclazide    | 60 mg daily         | 55    | 8.7   | 36.8 | 8.26 | 1.65    | 32.72 | 3.9   |      |      |                                                                         | 10.5                |                                                    |                                                                                           |
| Erem 2014             |                |       |      |      |                 | Pioglitazone  | 30 mg daily         | 52.5  | 5.2   | 26.3 | 8.03 | 1.7     | 31.31 | 4.7   |      |      |                                                                         | 0                   |                                                    |                                                                                           |
| ESPECIAL-ACS          | UMIN00007900   | 41    | 2017 | 6    | Japan           | Sitagliptin   | 50-100 mg daily     | 95.2  | 6.7   | 95.2 | 6.7  | 0.5     | 25.1  | 3.2   |      |      |                                                                         | 100                 | None                                               |                                                                                           |
| ESPECIAL-ACS          |                |       |      |      |                 | Control       |                     | 100   | 6.8   | 0.6  | 24.3 | 2.9     |       |       |      |      |                                                                         | 100                 |                                                    |                                                                                           |
| Esposito 2004         | Not applicable | 175   | 2004 | 12   | Italy           | Glyburide     | 20 mg daily         | 51.3  | 5.9   | 52.9 | 7.4  | 1.1     | 28.3  | 4.1   |      |      |                                                                         |                     | Oral drugs                                         |                                                                                           |
| Esposito 2004         |                |       |      |      |                 | Repaglinide   | 12 mg daily         | 52    | 6.4   | 53.4 | 7.5  | 1.1     | 28.5  | 4.3   |      |      |                                                                         |                     |                                                    |                                                                                           |
| Esposito 2011         | Not provided   | 110   | 2011 | 5.5  | Italy           | Metformin     | 2000 mg daily       | 54.9  | 6.6   | 50.9 | 8.1  | 1       | 29.1  | 3.3   |      |      |                                                                         |                     | None                                               |                                                                                           |
| Esposito 2011         |                |       |      |      |                 | Pioglitazone  | 45 mg daily         | 54.2  | 6.1   | 54.5 | 8    | 1       | 28.9  | 3.5   |      |      |                                                                         |                     |                                                    |                                                                                           |
| Essen Study           | Not applicable | 85    | 1994 | 5.5  | Germany         | Glibenclamide | 10.5 mg daily       | 59.5  | 5.7   | 48   | 8.3  | 0.37    | 26.5  | 2.1   |      |      |                                                                         | 1.5                 | None                                               |                                                                                           |
| Essen Study           |                |       |      |      |                 | Acarbose      | 300 mg daily        | 58.8  | 6.9   | 46   | 8.29 | 0.42    | 26.5  | 1.6   |      |      |                                                                         | 1.1                 |                                                    |                                                                                           |
| Essen Study           |                |       |      |      |                 | Placebo       |                     | 56.9  | 6.7   | 40   | 8.29 | 0.37    | 26.8  | 1.5   |      |      |                                                                         | 1                   |                                                    |                                                                                           |
| EUREXA                | NCT00359762    | 1029  | 2012 | 26   | Multinational   | Glimepiride   | Titrated            | 56.8  | 9.14  | 52   | 7.4  | 0.7     | 27.3  | 3.9   |      |      |                                                                         | 5.5                 | Metformin                                          |                                                                                           |
| EUREXA                |                |       |      |      |                 | Exenatide     | 10-20 mcg daily     | 56.1  | 10.03 | 56   | 7.5  | 0.7     | 32.6  | 4.2   |      |      |                                                                         | 5.8                 |                                                    |                                                                                           |
| EUREXA extension      | NCT00359762    | 154   | 2015 | 24   | Multinational   | Glimepiride   | Titrated            | 56    | 10    | 54.1 | 7.6  | 0.6     | 32.6  | 4.1   |      |      |                                                                         | 7.2                 | Metformin + exenatide                              |                                                                                           |
| EUREXA extension      |                |       |      |      |                 | Pioglitazone  | 45 mg daily         | 55.7  | 9.2   | 65.8 | 7.7  | 0.7     | 32.8  | 4.3   |      |      |                                                                         | 6.9                 |                                                    |                                                                                           |
| EXAMINE               | NCT00968708    | 5380  | 2013 | 19   | Multinational   | Alogliptin    | 6.25-25mg daily     | 67.7  | 6.7   | 65.8 | 6.7  | 0.7     | 28.7  | 28.7  |      |      |                                                                         | 87.5                | 71.1                                               | Anti-diabetic therapy other than DPP-4 inhibitor or GLP-1 receptor agonist                |
| EXAMINE               |                |       |      |      |                 | Placebo       |                     | 68    | 6.8   | 68   | 6.8  | 0.7     | 28.7  | 28.7  |      |      |                                                                         | 88.4                | 71.2                                               |                                                                                           |
| Exenatide-113         | Not applicable | 377   | 2004 | 7    | USA             | Exenatide     | 20 mcg daily        | 56    | 11    | 57.4 | 8.6  | 1.2     | 33    | 6     |      |      |                                                                         | 6.6                 | Sulfonylurea                                       |                                                                                           |
| Exenatide-113         |                |       |      |      |                 | Exenatide     | 10 mcg daily        | 55    | 10    | 59.2 | 8.5  | 1.1     | 33    | 6     |      |      |                                                                         | 6.3                 |                                                    |                                                                                           |
| Exenatide-113         |                |       |      |      |                 | Placebo       |                     | 55    | 11    | 62.6 | 8.7  | 1.2     | 34    | 5     |      |      |                                                                         | 5.7                 |                                                    |                                                                                           |
| EXSCEL                | NCT01144338    | 14752 | 2017 | 38.4 | Multinational   | Exenatide     | 2 mg weekly         | 62    | 6.2   | 8    |      |         | 31.8  | 2.9   |      |      |                                                                         | 73.3                | 76.6                                               | Up to three oral glucose-lowering agents or insulin plus two oral glucose-lowering agents |
| EXSCEL                |                |       |      |      |                 | Placebo       |                     | 62    | 8     | 31.7 |      |         | 31.7  | 2.8   |      |      |                                                                         | 72                  | 72.9                                               | 76                                                                                        |
| Feng 2017             | NCT03068065    | 93    | 2017 | 5.5  | China           | Metformin     | 1000 mg twice daily | 46.31 | 12.3  | 65.5 | 9.36 | 1.78    | 26.82 | 3.66  |      |      |                                                                         |                     | None                                               |                                                                                           |
| Feng 2017             |                |       |      |      |                 | Gliclazide    | 120 mg daily        | 48.07 | 12.6  | 68.9 | 9.03 | 1.24    | 27.85 | 3.02  |      |      |                                                                         |                     |                                                    |                                                                                           |
| Feng 2017             |                |       |      |      |                 | Liraglutide   | 1.8 mg daily        | 46.79 | 9.7   | 72.4 | 8.91 | 1.72    | 28.1  | 3.02  |      |      |                                                                         |                     |                                                    |                                                                                           |
| Ferdinand 2019        | NCT01182830    | 150   | 2019 | 5.5  | USA             | Empagliflozin | 10-25 mg daily      | 56.5  | 9.3   | 55.1 | 8.66 | 0.92    |       |       |      |      | 9.3                                                                     | 7.7                 | 91.2                                               | None or stable oral hypoglycemic drug                                                     |
| Ferdinand 2019        |                |       |      |      |                 | Placebo       |                     | 57.2  | 9.3   | 50   | 8.51 | 1.09    |       |       |      |      | 9.3                                                                     | 6.9                 | 91.49                                              |                                                                                           |
| Fernandez 2008        | Not provided   | 20    | 2008 | 8.4  | USA             | Pioglitazone  | 45 mg daily         |       |       | 9    | 0.7  |         |       |       |      |      |                                                                         |                     |                                                    | Insulin                                                                                   |
| Fernandez 2008        |                |       |      |      |                 | Placebo       |                     |       |       | 9.2  | 0.4  |         |       |       |      |      |                                                                         |                     |                                                    |                                                                                           |
| Ferranini 2010        | NCT00528372    | 485   | 2010 | 5.5  | Multinational   | Dapagliflozin | 10 mg daily         | 50.6  | 9.97  | 48.6 | 8.01 | 0.96    | 33.6  | 5.4   |      |      |                                                                         |                     |                                                    | None                                                                                      |
| Ferranini 2010        |                |       |      |      |                 | Dapagliflozin | 5 mg daily          | 52.6  | 10.9  | 48.4 | 7.86 | 0.94    | 31.9  | 4.8   |      |      |                                                                         |                     |                                                    |                                                                                           |
| Ferranini 2010        |                |       |      |      |                 | Dapagliflozin | 2.5 mg daily        | 53    | 11.7  | 55.4 | 7.92 | 0.9     | 32.6  | 5.5   |      |      |                                                                         |                     |                                                    |                                                                                           |
| Ferranini 2010        |                |       |      |      |                 | Placebo       |                     | 52.7  | 10.3  | 41.3 | 7.84 | 0.89    | 32.8  | 5.5   |      |      |                                                                         |                     |                                                    |                                                                                           |
| FIGHT                 | NCT01800968    | 178   | 2018 | 6    | USA             | Liraglutide   | 1.8 mg daily        | 63.0  | 57.69 | 75.0 | 7.3  | 6.6-8.5 | 32.0  | 27.37 |      |      |                                                                         |                     |                                                    | Antidiabetic therapy                                                                      |
| FIGHT                 |                |       |      |      |                 | Placebo       |                     | 62.0  | 54.68 | 77.0 | 7.6  | 6.8-8.5 | 34.0  | 28.40 |      |      |                                                                         |                     |                                                    | 100                                                                                       |
| Filozof 2010          | Not provided   |       |      |      |                 |               |                     |       |       |      |      |         |       |       |      |      |                                                                         |                     |                                                    |                                                                                           |

|                               |                |      |      |      |               |                               |                   |      |       |      |      |      |      |      |      |                                                                                                                                                                               |                                                                                                                                                     |
|-------------------------------|----------------|------|------|------|---------------|-------------------------------|-------------------|------|-------|------|------|------|------|------|------|-------------------------------------------------------------------------------------------------------------------------------------------------------------------------------|-----------------------------------------------------------------------------------------------------------------------------------------------------|
| Forst 2003                    | Not applicable | 143  | 2003 | 6    | Germany,      | Glibenclamide                 | 3.5-10.5 mg daily | 56.6 | 8.6   | 57.4 | 7.7  | 1.2  | 28.7 | 3.9  | 4.3  | Oral antidiabetic drugs                                                                                                                                                       |                                                                                                                                                     |
| Forst 2003                    |                |      |      |      |               | Insulin lispro                | Titrated          | 58.7 | 7.3   | 68   | 7.5  | 1    | 29.7 | 3.6  | 4.4  |                                                                                                                                                                               |                                                                                                                                                     |
| Forst 2005                    | Not applicable | 173  | 2005 | 5.5  | Germany       | Glimepiride                   | 1-6 mg daily      | 63   | 7.4   | 61.9 | 7.44 | 0.89 | 21.9 | 4.3  | 6.9  | Additional antidiabetic medication                                                                                                                                            |                                                                                                                                                     |
| Forst 2005                    |                |      |      |      |               | Pioglitazone                  | 45 mg daily       | 62.2 | 8.4   | 61.8 | 7.52 | 0.85 | 31.7 | 5    | 7.4  |                                                                                                                                                                               |                                                                                                                                                     |
| Forst 2014                    | NCT01106690    | 342  | 2014 | 6    | Multinational | Canagliflozin                 | 300 mg daily      | 57   | 10.2  | 55.3 | 7.9  | 0.9  | 32.8 | 7.7  | 11   | 87.4                                                                                                                                                                          | Metformin + pioglitazone                                                                                                                            |
| Forst 2014                    |                |      |      |      |               | Canagliflozin                 | 100 mg daily      | 56.7 | 10.4  | 68.1 | 8    | 0.9  | 32.3 | 6.2  | 10.5 | 84.6                                                                                                                                                                          |                                                                                                                                                     |
| Forst 2014                    |                |      |      |      |               | Placebo                       |                   | 58.3 | 9.6   | 66.1 | 8    | 1    | 32.5 | 6.4  | 8    | 87.2                                                                                                                                                                          |                                                                                                                                                     |
| Forst 2015                    | NCT01649466    | 161  | 2015 | 5.5  | Germany       | Vildagliptin                  | 50 mg daily       | 65.9 | 9.8   | 56.1 | 7.6  | 0.5  | 29.7 | 4.5  | 7.3  | Sulfonylurea                                                                                                                                                                  |                                                                                                                                                     |
| Forst 2015                    |                |      |      |      |               | NPH insulin                   | Titrated          | 67.6 | 11.9  | 60.8 | 7.7  | 0.5  | 31.4 | 5.2  | 8.6  |                                                                                                                                                                               |                                                                                                                                                     |
| Frederich 2012                | NCT00316082    | 365  | 2012 | 5.5  | Multinational | Saxagliptin                   | 5 mg daily        | 54.7 | 9.71  | 51.4 | 8    | 0.9  | 31   | 5.23 | 1.7  | 10.8                                                                                                                                                                          | None                                                                                                                                                |
| Frederich 2012                |                |      |      |      |               | Saxagliptin                   | 5 mg daily        | 55.1 | 10.35 | 45.8 | 7.9  | 0.9  | 29.6 | 5.37 | 2    | 11.1                                                                                                                                                                          |                                                                                                                                                     |
| Frederich 2012                |                |      |      |      |               | Saxagliptin                   | 1.5 mg daily      | 55.2 | 10.44 | 31.8 | 8    | 0.8  | 30.4 | 3.94 | 1.2  | 12.2                                                                                                                                                                          |                                                                                                                                                     |
| Frederich 2012                |                |      |      |      |               | Saxagliptin                   | 2.5-5mg daily     | 54.3 | 10.93 | 52.1 | 8    | 1.1  | 30.6 | 4.72 | 2    | 21.1                                                                                                                                                                          |                                                                                                                                                     |
| Frederich 2012                |                |      |      |      |               | Placebo                       |                   | 55.6 | 10.32 | 47.3 | 7.8  | 1    | 31.1 | 4.54 | 1.7  | 12.2                                                                                                                                                                          |                                                                                                                                                     |
| FREEDOM-1                     | NCT01455857    | 460  | 2018 | 9.1  | USA           | Ezetimibe                     | 60 mcg daily      | 54.7 | 9.6   | 59.5 | 8.5  | 0.8  | 33.8 | 5.2  | 8.9  | 87.6                                                                                                                                                                          | Diet and exercise alone or with metformin, sulfonylureas or pioglitazone monotherapy or in combination                                              |
| FREEDOM-1                     |                |      |      |      |               | Placebo                       | 40 mcg daily      | 55.5 | 10.3  | 58.2 | 8.5  | 0.8  | 33.1 | 5.1  | 9.1  | 86.5                                                                                                                                                                          |                                                                                                                                                     |
| FREEDOM-1                     |                |      |      |      |               | Placebo                       |                   | 54.7 | 9.1   | 59.7 | 8.5  | 0.8  | 33.7 | 5.5  | 8.6  | 89.3                                                                                                                                                                          |                                                                                                                                                     |
| Frias 2018                    | NCT03131687    | 105  | 2018 | 6    | Multinational | Dulaglutide                   | 1.5 mg weekly     | 58.7 | 7.8   | 44.0 | 8.1  | 1.0  | 32.4 | 5.4  | 9.3  | Metformin                                                                                                                                                                     |                                                                                                                                                     |
| Frias 2018                    |                |      |      |      |               | Placebo                       |                   | 56.6 | 8.9   | 57.0 | 8.0  | 0.9  | 32.4 | 6.0  | 8.6  |                                                                                                                                                                               |                                                                                                                                                     |
| Gaal 2001                     | Not applicable | 152  | 2001 | 6.4  | Multinational | Miglitol                      | 300 mg daily      | 57.9 | 10    | 41.6 | 8.5  | 1    | 30   | 4    |      | Metformin                                                                                                                                                                     |                                                                                                                                                     |
| Gaal 2001                     |                |      |      |      |               | Placebo                       |                   | 57.9 | 8.5   | 49.3 | 8.4  | 1    | 29.7 | 3.9  |      |                                                                                                                                                                               |                                                                                                                                                     |
| Gallwitz 2011                 | NCT00434954    | 494  | 2011 | 6    | Germany       | Ezetimibe                     | 10-20 mcg daily   | 57.2 | 10.03 | 59.7 | 7.89 | 0.8  | 33.4 | 4.23 | 4.8  | Metformin                                                                                                                                                                     |                                                                                                                                                     |
| Gallwitz 2011                 |                |      |      |      |               | Insulin aspart 70/30 Titrated |                   | 56.9 | 9.94  | 55.5 | 7.88 | 0.9  | 32.9 | 4.37 | 5.2  |                                                                                                                                                                               |                                                                                                                                                     |
| Gallwitz 2012                 | NCT00622284    | 1552 | 2012 | 24   | Multinational | Glimepiride                   | 1 mg daily        | 59.8 | 9.4   | 61   | 7.7  | 0.9  | 30.3 | 4.6  |      | Metformin                                                                                                                                                                     |                                                                                                                                                     |
| Gallwitz 2012                 |                |      |      |      |               | Linagliptin                   | 5 mg daily        | 59.8 | 9.4   | 60   | 7.7  | 0.9  | 30.2 | 4.8  |      |                                                                                                                                                                               |                                                                                                                                                     |
| Gantz 2017                    | NCT01703208    | 4202 | 2017 | 22.3 | Multinational | Omarigliptin                  | 25 mg daily       | 63.7 | 8.5   | 69.6 | 8    | 0.9  | 31.2 | 5.5  | 12   | 85.7                                                                                                                                                                          | Diet and exercise alone or on monotherapy or dual combination therapy with metformin, pioglitazone, alpha glucosidase inhibitor, or SGLT2 inhibitor |
| Gantz 2017                    |                |      |      |      |               | Placebo                       |                   | 63.6 | 8.5   | 70.7 | 8    | 0.9  | 31.4 | 5.6  | 12.1 | 86.6                                                                                                                                                                          |                                                                                                                                                     |
| Gantz 2017a                   | NCT01814748    | 303  | 2017 | 5.5  | Multinational | Omarigliptin                  | 25 mg daily       | 38.8 | 4.7   | 65.7 | 7.9  | 0.8  | 32.9 | 5.8  | 2.9  | Background therapy                                                                                                                                                            |                                                                                                                                                     |
| Gantz 2017a                   |                |      |      |      |               | Placebo                       |                   | 39.5 | 4.5   | 59.4 | 8.1  | 0.9  | 32.1 | 5    | 3.3  |                                                                                                                                                                               |                                                                                                                                                     |
| Garber 2006                   | Not provided   | 318  | 2006 | 5.5  | USA           | Glibenclamide                 | 5 mg daily        | 56   | 31.78 | 56   | 8.5  | 1.2  | 32   | 5    | 5    | Metformin                                                                                                                                                                     |                                                                                                                                                     |
| Garber 2006                   |                |      |      |      |               | Rosiglitazone                 | 4 mg daily        | 56   | 24.78 | 65   | 8.4  | 1.1  | 32   | 5    | 6    |                                                                                                                                                                               |                                                                                                                                                     |
| Garber 2007                   | NCT00999853    | 463  | 2007 | 5.5  | Multinational | Vildagliptin                  | 100 mg daily      | 54   | 9.2   | 44.9 | 8.7  | 1.2  | 32.2 | 5.8  | 4.6  | Thiazolidinedione                                                                                                                                                             |                                                                                                                                                     |
| Garber 2007                   |                |      |      |      |               | Vildagliptin                  | 50 mg daily       | 54   | 8.2   | 54.8 | 8.6  | 1    | 32   | 6    | 4.7  |                                                                                                                                                                               |                                                                                                                                                     |
| Garber 2007                   |                |      |      |      |               | Placebo                       |                   | 54.8 | 10.6  | 50.7 | 8.7  | 1.2  | 32.3 | 5.8  | 4.8  |                                                                                                                                                                               |                                                                                                                                                     |
| Garber 2008                   | NCT00999944    | 515  | 2008 | 5.5  | Multinational | Vildagliptin                  | 100 mg daily      | 58.2 | 11.1  | 59.8 | 8.6  | 1    | 30.8 | 5.3  | 6.7  | Sulfonylurea                                                                                                                                                                  |                                                                                                                                                     |
| Garber 2008                   |                |      |      |      |               | Vildagliptin                  | 50 mg daily       | 58.6 | 10.6  | 59.1 | 8.5  | 0.9  | 32.2 | 4.9  | 6.9  |                                                                                                                                                                               |                                                                                                                                                     |
| Garber 2008                   |                |      |      |      |               | Placebo                       |                   | 57.9 | 10.5  | 58.3 | 8.5  | 1    | 31   | 5.5  | 7.8  |                                                                                                                                                                               |                                                                                                                                                     |
| Gastaldelli 2014              | NCT00381342    | 79   | 2014 | 5.5  | USA           | Ezetimibe                     | 10 mcg daily      | 59   | 10.8  | 37.9 | 7.73 | 0.92 | 30.3 | 5.4  |      | None                                                                                                                                                                          |                                                                                                                                                     |
| Gastaldelli 2014              |                |      |      |      |               | Ezetimibe                     | 5 mcg daily       | 57   | 10.2  | 38.5 | 7.78 | 0.92 | 31.2 | 4.6  |      |                                                                                                                                                                               |                                                                                                                                                     |
| Gastaldelli 2014              |                |      |      |      |               | Placebo                       |                   | 54   | 9.8   | 50   | 7.77 | 0.8  | 32.9 | 4.9  |      |                                                                                                                                                                               |                                                                                                                                                     |
| GENERATION                    | NCT01006603    | 720  | 2015 | 12   | Multinational | Glimepiride                   | 1-6 mg daily      | 72.7 | 5.4   | 63.3 | 7.58 | 0.67 | 29.9 | 5    | 7.6  | 10                                                                                                                                                                            | Metformin                                                                                                                                           |
| GENERATION                    |                |      |      |      |               | Saxagliptin                   | 5 mg daily        | 72.5 | 5.7   | 60.3 | 7.62 | 0.55 | 29.3 | 4.7  | 7.6  | 8.6                                                                                                                                                                           |                                                                                                                                                     |
| Gentile 2001                  | Not applicable | 100  | 2001 | 6.5  | Italy         | Acarbose                      | 300 mg daily      |      |       |      | 8.7  | 0.8  |      |      |      | Insulin                                                                                                                                                                       |                                                                                                                                                     |
| GetGoal-Duo-1                 | NCT00975286    | 446  | 2013 | 5.5  | Multinational | Lixisenatide                  | 20 mcg daily      | 56   | 10    | 49   | 7.6  | 0.5  | 32   | 6.6  | 9.6  | Metformin ± thiazolidinedione + insulin                                                                                                                                       |                                                                                                                                                     |
| GetGoal-Duo-1                 |                |      |      |      |               | Placebo                       |                   | 56   | 10    | 51   | 7.6  | 0.5  | 31.7 | 6    | 8.7  |                                                                                                                                                                               |                                                                                                                                                     |
| GetGoal-Duo-2                 | NCT01768559    | 894  | 2016 | 5.5  | Multinational | Lixisenatide                  | 20 mcg daily      | 59.8 | 8.6   | 46.3 | 8.5  | 0.7  | 32.3 | 4.6  | 11.9 | Metformin + insulin glargine                                                                                                                                                  |                                                                                                                                                     |
| GetGoal-Duo-2                 |                |      |      |      |               | Insulin glulisine             |                   | 60.2 | 8.6   | 45.3 | 8.5  | 0.7  | 31.9 | 4.4  | 12.3 |                                                                                                                                                                               |                                                                                                                                                     |
| GetGoal-Duo-2                 |                |      |      |      |               | Insulin glulisine             |                   | 59.4 | 9.5   | 44.3 | 8.5  | 0.8  | 32.5 | 4.6  | 12.4 |                                                                                                                                                                               |                                                                                                                                                     |
| GetGoal-F1                    | NCT00763451    | 482  | 2014 | 17.5 | Multinational | Lixisenatide                  | 10-20 mcg daily   | 54.6 | 8.9   | 45   | 8.1  | 0.9  | 32.1 | 4.8  | 6    | Metformin                                                                                                                                                                     |                                                                                                                                                     |
| GetGoal-F1                    |                |      |      |      |               | Lixisenatide                  | 10-20 mcg daily   | 55.4 | 8.9   | 44   | 8    | 0.9  | 31   | 4.8  | 5.8  |                                                                                                                                                                               |                                                                                                                                                     |
| GetGoal-F1                    |                |      |      |      |               | Placebo                       |                   | 58.2 | 9.8   | 45   | 8    | 0.8  | 32.4 | 5.5  | 6.2  |                                                                                                                                                                               |                                                                                                                                                     |
| GetGoal-L                     | NCT00715624    | 496  | 2013 | 6    | Multinational | Lixisenatide                  | 10-20 mcg daily   | 57   | 10    | 45   | 8.4  | 0.9  | 31.9 | 6.2  | 12.5 | Insulin ± metformin                                                                                                                                                           |                                                                                                                                                     |
| GetGoal-L                     |                |      |      |      |               | Placebo                       |                   | 57   | 10    | 49   | 8.4  | 0.8  | 32.6 | 6.3  | 12.4 |                                                                                                                                                                               |                                                                                                                                                     |
| GetGoal-L-C                   | NCT01632163    | 448  | 2018 | 5.5  | Multinational | Lixisenatide                  | 10-20 mcg daily   | 63.9 | 9.9   | 46.9 | 7.9  | 0.66 | 27.5 | 4.39 | 10.3 | Insulin with or without metformin                                                                                                                                             |                                                                                                                                                     |
| GetGoal-L-C                   |                |      |      |      |               | Placebo                       |                   | 56.2 | 9.1   | 43.8 | 8.6  | 0.86 | 27.9 | 4.48 | 10.2 |                                                                                                                                                                               |                                                                                                                                                     |
| GetGoal-L-Asia                | NCT00866588    | 311  | 2012 | 6    | Multinational | Lixisenatide                  | 10-20 mcg daily   | 58.7 | 10.2  | 44.8 | 8.54 | 0.73 | 25.4 | 3.7  | 13.7 | Insulin ± sulfonylurea                                                                                                                                                        |                                                                                                                                                     |
| GetGoal-L-Asia                |                |      |      |      |               | Placebo                       |                   | 58   | 10.1  | 51   | 8.52 | 0.78 | 25.2 | 3.9  | 14.1 |                                                                                                                                                                               |                                                                                                                                                     |
| GetGoal-M                     | NCT00712673    | 680  | 2013 | 5.5  | Multinational | Lixisenatide                  | 20 mcg daily      | 54.8 | 10.4  | 38.4 | 8.1  | 0.9  | 32.5 | 5.8  | 6.2  | Metformin                                                                                                                                                                     |                                                                                                                                                     |
| GetGoal-M                     |                |      |      |      |               | Lixisenatide                  | 20 mcg daily      | 54.5 | 10.2  | 44.7 | 8    | 0.9  | 33.2 | 6.9  | 6.2  |                                                                                                                                                                               |                                                                                                                                                     |
| GetGoal-M                     |                |      |      |      |               | Placebo                       |                   | 55   | 9.4   | 47.6 | 8.1  | 0.9  | 33.1 | 6.5  | 5.9  |                                                                                                                                                                               |                                                                                                                                                     |
| GetGoal-M-Asia                | NCT01169779    | 390  | 2014 | 5.5  | Multinational | Lixisenatide                  | 10-20 mcg daily   | 54.5 | 10.3  | 51.5 | 7.95 | 0.81 | 26.8 | 3.9  | 6.5  | Metformin ± sulfonylurea                                                                                                                                                      |                                                                                                                                                     |
| GetGoal-M-Asia                |                |      |      |      |               | Placebo                       |                   | 55.1 | 10.5  | 46.9 | 7.85 | 0.71 | 27.1 | 3.8  | 6.8  |                                                                                                                                                                               |                                                                                                                                                     |
| GetGoal-O                     | NCT01798706    | 350  | 2017 | 5.5  | Multinational | Lixisenatide                  | 20 mcg daily      | 74   | 4     | 52.3 | 8.1  | 0.7  | 29.9 | 3.7  | 13.6 | Permitted therapies were metformin, sulfonylurea (except glibenclamide >10 mg and glitazide >160 mg), meglitinide (except repaglinide >6 mg), pioglitazone, and basal insulin |                                                                                                                                                     |
| GetGoal-O                     |                |      |      |      |               | Placebo                       |                   | 74.4 | 3.8   | 51.7 | 8.1  | 0.7  | 30.1 | 4.5  | 14.6 |                                                                                                                                                                               |                                                                                                                                                     |
| GetGoal-P                     | NCT00763815    | 484  | 2013 | 5.5  | Multinational | Lixisenatide                  | 10-20 mcg daily   | 56   | 9.5   | 53   | 8.1  | 0.9  | 33.7 | 6.7  | 8.1  | Thiazolidinedione ± metformin                                                                                                                                                 |                                                                                                                                                     |
| GetGoal-P                     |                |      |      |      |               | Placebo                       |                   | 55.3 | 9.5   | 51   | 8.1  | 0.8  | 34.4 | 7    | 8.1  |                                                                                                                                                                               |                                                                                                                                                     |
| GetGoal-S                     | NCT00713830    | 899  | 2014 | 5.5  | Multinational | Lixisenatide                  | 10-20 mcg daily   | 57   | 9.8   | 49.5 | 8.3  | 0.9  | 30.1 | 6.6  | 9.1  | Sulfonylurea ± metformin                                                                                                                                                      |                                                                                                                                                     |
| GetGoal-S                     |                |      |      |      |               | Placebo                       |                   | 57.8 | 10.1  | 52.6 | 8.2  | 0.8  | 30.4 | 6.6  | 9.8  |                                                                                                                                                                               |                                                                                                                                                     |
| Giles 2008                    | NCT00521820    | 518  | 2008 | 6    | Multinational | Glyburide                     | 10-15 mg daily    | 63.4 | 9.38  | 77   | 7.95 | 1.8  | 29.7 | 5.37 | 11.7 | 100                                                                                                                                                                           | Thiazolidinedione or sulfonylurea ± insulin                                                                                                         |
| Giles 2008                    |                |      |      |      |               | Pioglitazone                  | 30-45 mg daily    | 64.2 | 9.92  | 70.2 | 8.74 | 1.6  | 29.6 | 5.2  | 11.8 | 100                                                                                                                                                                           |                                                                                                                                                     |
| Gingiano 1993                 | Not applicable | 50   | 1993 | 6    | Italy         | Metformin                     | 1500 mg daily     | 60   | 1     | 37   | 11.5 | 1.2  | 33   | 3.1  | 11.9 | Insulin                                                                                                                                                                       |                                                                                                                                                     |
| Giugliano 1993                |                |      |      |      |               | Placebo                       |                   | 60.8 | 1.1   | 39.1 | 11.7 | 1.3  | 32.7 | 3.2  | 11.2 |                                                                                                                                                                               |                                                                                                                                                     |
| GLAC                          | Not applicable | 200  | 2004 | 9    | Multinational | Glibenclamide                 | 10.5 mg daily     | 57.9 | 9.2   | 73   | 8.5  | 0.8  | 29.6 | 4.8  |      | No therapy or monotherapy                                                                                                                                                     |                                                                                                                                                     |
| GLAC                          |                |      |      |      |               | Placebo                       |                   | 60   | 8.5   | 62   | 8.4  | 0.7  | 30.2 | 5.6  |      |                                                                                                                                                                               |                                                                                                                                                     |
| GLAD                          | Not applicable | 244  | 2004 | 12   | Mexico        | Glimepiride                   | 8 mg daily        | 55.7 | 9.3   | 53   | 8.45 | 1.02 | 28.8 | 3.2  | 6.8  | None                                                                                                                                                                          |                                                                                                                                                     |
| GLAD                          |                |      |      |      |               | Pioglitazone                  | 45 mg daily       | 55.1 | 8     | 45   | 8.54 | 0.9  | 29.9 | 3.3  | 6.9  |                                                                                                                                                                               |                                                                                                                                                     |
| GLAL                          | Not applicable | 567  | 2005 | 12   | Multinational | Gliclazide                    | 320 mg daily      | 56   | 9.9   | 61.3 |      |      | 31   | 5.6  | 2.9  | None                                                                                                                                                                          |                                                                                                                                                     |
| GLAL                          |                |      |      |      |               | Pioglitazone                  | 45 mg daily       | 57   | 9.8   | 63.3 |      |      | 32   | 6.4  | 2.7  |                                                                                                                                                                               |                                                                                                                                                     |
| Glimepiride Combo             | Not applicable | 145  | 1998 | 5.5  | USA           | Glimepiride                   | 8 mg twice daily  | 58   | 8     | 62.5 | 9.7  |      | 32.2 | 4.4  | 4    | None                                                                                                                                                                          |                                                                                                                                                     |
| Glimepiride Combination Group |                |      |      |      |               |                               |                   |      |       |      |      |      |      |      |      |                                                                                                                                                                               |                                                                                                                                                     |



|                         |                |      |      |      |                   |                                            |                    |       |       |          |      |      |       |      |       |      |                                                             |                  |
|-------------------------|----------------|------|------|------|-------------------|--------------------------------------------|--------------------|-------|-------|----------|------|------|-------|------|-------|------|-------------------------------------------------------------|------------------|
| Guzman 2017             | NCT02111096    | 174  | 2017 | 6    | Multinational     | Sitagliptin                                | 100 mg daily       | 57.1  | 9     | 75.6     | 8.3  | 0.9  | 31.8  | 6.1  | 10.9  |      | Metformin + sulfonylurea                                    |                  |
| Guzman 2017             |                |      |      |      |                   | LY2409021                                  | 20 mg daily        | 56.9  | 8.3   | 63.1     | 8.1  | 1    | 32.6  | 5.5  | 10.2  |      |                                                             |                  |
| Guzman 2017             |                |      |      |      |                   | Placebo                                    |                    | 57.8  | 8.2   | 54.4     | 8.2  | 0.9  | 31.2  | 4.7  | 12.4  |      |                                                             |                  |
| Haak 2012               | NCT00988616    | 791  | 2012 | 6    | Multinational     | Linagliptin                                | 2.5 mg daily       | 55.6  | 11.2  | 51       | 8.7  | 1    | 29.7  | 5.3  |       |      | Metformin                                                   |                  |
| Haak 2012               |                |      |      |      |                   | Linagliptin                                | 2.5 mg daily       | 56.4  | 10.7  | 53.8     | 8.7  | 1    | 28.6  | 4.8  |       |      |                                                             |                  |
| Haak 2012               |                |      |      |      |                   | Standard care                              |                    | 55.2  | 10.6  | 53.1     | 8.5  | 0.9  | 29.5  | 5.3  |       |      |                                                             |                  |
| Haak 2012               |                |      |      |      |                   | Standard care                              |                    | 52.9  | 10.4  | 56.9     | 8.7  | 0.9  | 28.9  | 4.8  |       |      |                                                             |                  |
| Haak 2012               |                |      |      |      |                   | Linagliptin                                | 5 mg               | 56.2  | 10.8  | 56.3     | 8.7  | 1    | 29    | 4.7  |       |      | None                                                        |                  |
| Haak 2012               |                |      |      |      |                   | Placebo                                    |                    | 55.7  | 11    | 50       | 8.7  | 1    | 28.6  | 5.2  |       |      |                                                             |                  |
| Hadjadj 2016            | NCT01719003    | 665  | 2016 | 5.5  | Multinational     | Metformin                                  | 1000 mg daily      | 51.6  | 10.8  | 51.2     | 8.69 | 1.04 | 30.3  | 5.8  |       |      | 90.9                                                        |                  |
| Hadjadj 2016            |                |      |      |      |                   | Metformin                                  | 2000 mg daily      | 53.4  | 10.9  | 56.1     | 8.58 | 1.13 | 30.5  | 5.9  |       |      | 93.2                                                        |                  |
| Hadjadj 2016            |                |      |      |      |                   | Empagliflozin                              | 10 mg daily        | 53.1  | 10.7  | 57.4     | 8.62 | 1.24 | 30.3  | 6.2  |       |      | 94                                                          |                  |
| Hadjadj 2016            |                |      |      |      |                   | Empagliflozin                              | 25 mg daily        | 53.3  | 10.7  | 50.6     | 8.86 | 1.29 | 30.6  | 5.9  |       |      | 91.7                                                        |                  |
| Halimi 2000             | Not applicable | 152  | 2000 | 6    | France            | Acarbose                                   | 300 mg daily       | 56    | 9.2   | 47.5     | 8.6  | 1.1  | 30.1  | 3.3  | 9.5   |      | None                                                        |                  |
| Halimi 2000             |                |      |      |      |                   | Placebo                                    |                    | 55    | 10    | 62.9     | 8.5  | 1.1  | 29.7  | 3.3  | 9     |      |                                                             |                  |
| Hällsten 2002           | Not applicable | 31   | 2002 | 6    | Finland           | Metformin                                  | 1000-2000 mg daily | 57.8  | 7.9   | 61.5     | 6.9  | 0.7  | 29.9  | 4    |       |      | None                                                        |                  |
| Hällsten 2002           |                |      |      |      |                   | Rosiglitazone                              | 4-8 mg daily       | 58.6  | 7.5   | 71.4     | 6.8  | 0.7  | 29.3  | 3.7  |       |      |                                                             |                  |
| Hällsten 2002           |                |      |      |      |                   | Placebo                                    |                    | 57.7  | 7.1   | 71.4     | 6.3  | 0.4  | 30.3  | 4.5  |       |      |                                                             |                  |
| Halvorsen 2019          | NCT01377844    | 286  | 2019 | 22.3 | Mexico and        | Bevaciflozin                               | 20 mg daily        | 56.2  | 10.9  | 46.2     |      |      | 29.7  | 5.35 | 7.55  |      | None                                                        |                  |
| Halvorsen 2019          |                |      |      |      |                   | Placebo                                    |                    | 54.9  | 10.3  | 35.5     |      |      | 30.6  | 5.46 | 7.38  |      |                                                             |                  |
| Halvorsen 2019a         | NCT03115112    | 384  | 2019 | 5.5  | Multinational     | Sitagliptin                                | 100 mg daily       | 59.6  | 9.8   | 65.3     | 8.0  | 0.9  | 31.4  | 5.3  | 9.36  |      | Metformin                                                   |                  |
| Halvorsen 2019a         |                |      |      |      |                   | Bevaciflozin                               | 20 mg daily        | 59.3  | 9.7   | 62.8     | 7.9  | 0.8  | 32.1  | 6.1  | 8.22  |      |                                                             |                  |
| Han 2016                | Not provided   | 219  | 2016 | 5.5  | Unclear           | Gempigliptin                               | 50 mg daily        |       |       |          |      |      |       |      |       |      | Metformin + glimepiride                                     |                  |
| Han 2016                |                |      |      |      |                   | Placebo                                    |                    |       |       |          |      |      |       |      |       |      |                                                             |                  |
| Han 2018                | NCT02452632    | 143  | 2018 | 5.5  | Republic of Korea | Empagliflozin                              | 50 mg daily        | 57.62 | 8.26  | 50.7     | 7.9  | 0.69 | 25.5  | 3.07 | 11.62 |      | 89.4                                                        |                  |
| Han 2018                |                |      |      |      |                   | Placebo                                    |                    | 57.44 | 7.88  | 48.5     | 7.92 | 0.79 | 26.05 | 3.79 | 11.3  |      | 90.7                                                        |                  |
| Handelman 2017          | NCT01682759    | 751  | 2017 | 12   | Multinational     | Glimepiride                                | 6 mg daily         | 58    | 9     | 56.3     | 7.4  | 0.7  | 31.7  | 6    | 7.7   |      | Metformin                                                   |                  |
| Handelman 2017          |                |      |      |      |                   | Omarigliptin                               | 25 mg weekly       | 58    | 10    | 54       | 7.5  | 0.8  | 31.2  | 5.3  | 7.6   |      |                                                             |                  |
| Handelman 2019          | NCT0284893     | 461  | 2019 | 5.5  | Multinational     | Dapagliflozin                              | 10 mg daily        | 55.9  | 8.9   | 43.1     | 8.8  | 0.8  | 33.3  | 6.1  | 7.9   |      | 92.2                                                        |                  |
| Handelman 2019          |                |      |      |      |                   | Control                                    |                    | 55.8  | 9.6   | 48       | 8.9  | 0.9  | 32.8  | 6.3  | 8.2   |      | 92.9                                                        |                  |
| Haneda 2016             | JapicCT-111507 | 145  | 2016 | 5.5  | Japan             | Luseogliflozin                             | 2.5-5 mg daily     | 67.9  | 8.9   | 75.8     | 7.72 | 0.68 | 25.45 | 4.18 | 10.4  | 20.2 | 52                                                          | 335.7            |
| Haneda 2016             |                |      |      |      |                   | Placebo                                    |                    | 68.4  | 8.9   | 78       | 7.69 | 0.65 | 25.81 | 3.95 | 12.6  | 20   | 52.4                                                        | 231.9            |
| Hanefeld 1991           | Not applicable | 100  | 1991 | 5.5  | Germany           | Acarbose                                   | 300 mg daily       | 60    | 43.70 | 49       | 8.7  | 0.9  | 27.4  | 4    | 5.8   |      | None                                                        |                  |
| Hanefeld 1991           |                |      |      |      |                   | Placebo                                    |                    | 59    | 43.70 | 47       | 9.5  | 0.9  | 27.7  | 4    | 6.1   |      |                                                             |                  |
| Hanefeld 2004           | Not applicable | 639  | 2004 | 12   | Multinational     | Metformin                                  | 850-2550 mg daily  | 60    | 8     | 54.7     | 8.8  | 0.97 | 30    | 4.6  | 7.1   |      | 0.11                                                        |                  |
| Hanefeld 2004           |                |      |      |      |                   | Pioglitazone                               | 15-45 mg daily     | 60    | 8.8   | 53.6     | 8.82 | 0.98 | 30.2  | 4.4  | 7     |      | 0.07                                                        |                  |
| Hanefeld 2007           | Not provided   | 598  | 2007 | 12   | Multinational     | Glibenclamide                              | 15 mg daily        | 60.1  | 8.3   | 70.4     | 8.2  | 1.3  | 28.7  | 3.9  | 6.4   |      | None                                                        |                  |
| Hanefeld 2007           |                |      |      |      |                   | Rosiglitazone                              | 8 mg daily         | 60.4  | 8.2   | 57.1     | 8.1  | 1.3  | 28.7  | 3.7  | 5.9   |      |                                                             |                  |
| Hanefeld 2007           |                |      |      |      |                   | Rosiglitazone                              | 4-8 mg daily       |       |       |          |      |      |       |      |       |      |                                                             |                  |
| HARMONY 1               | NCT00849056    | 310  | 2014 | 12   | Multinational     | Albiglutide                                | 30 mg weekly       | 55.2  | 9.98  | 61.3     | 8.1  | 1    | 33.6  | 5.9  | 8     |      | Thiazolidinedione + metformin                               |                  |
| HARMONY 1               |                |      |      |      |                   | Placebo                                    |                    | 54.9  | 9.4   | 58.3     | 8.1  | 0.9  | 34.7  | 24.5 | 7.9   |      |                                                             |                  |
| HARMONY 2               | NCT00849017    | 301  | 2016 | 12   | Multinational     | Albiglutide                                | 50 mg weekly       | 53    | 11.9  | 50.5     | 8.2  | 0.9  | 34.5  | 4.5  | 4.2   |      | None                                                        |                  |
| HARMONY 2               |                |      |      |      |                   | Albiglutide                                | 30 mg weekly       | 53.6  | 10.9  | 57.4     | 8    | 0.8  | 33.7  | 5.1  | 3.4   |      |                                                             |                  |
| HARMONY 2               |                |      |      |      |                   | Placebo                                    |                    | 53.1  | 11.7  | 57.4     | 8    | 0.9  | 33    | 5.4  | 4.3   |      |                                                             |                  |
| HARMONY 3               | NCT00838903    | 1012 | 2014 | 24   | Multinational     | Glimepiride                                | 2-4 mg daily       | 54.4  | 10    | 51.5     | 8.1  | 0.8  | 32.5  | 5.5  | 6     |      | Metformin                                                   |                  |
| HARMONY 3               |                |      |      |      |                   | Sitagliptin                                | 100 mg daily       | 54.3  | 9.8   | 46       | 8.1  | 0.8  | 32.5  | 5.4  | 5.8   |      |                                                             |                  |
| HARMONY 3               |                |      |      |      |                   | Albiglutide                                | 30-50 mg weekly    | 54.3  | 10.1  | 44.7     | 8.1  | 0.8  | 32.7  | 5.6  | 6     |      |                                                             |                  |
| HARMONY 3               |                |      |      |      |                   | Placebo                                    |                    | 56.1  | 10    | 49.5     | 8.2  | 0.9  | 32.8  | 5.4  | 6.7   |      |                                                             |                  |
| HARMONY 4               | NCT00838916    | 745  | 2014 | 12   | Multinational     | Albiglutide                                | 30 mg weekly       | 55.8  | 9.3   | 56.7     | 8.28 | 0.9  | 33.2  | 5.6  | 8.9   | 5.3  | Metformin + sulfonylurea                                    |                  |
| HARMONY 4               |                |      |      |      |                   | Insulin glargine                           | Titrated           | 54.7  | 9.8   | 54.8     | 8.36 | 0.95 | 33    | 5.4  | 8.4   | 4.6  |                                                             |                  |
| HARMONY 5               | NCT00839527    | 685  | 2015 | 12   | Multinational     | Pioglitazone                               | 30 mg daily        | 55.7  | 9.4   | 53.4     | 8.29 | 0.98 | 33    | 5.7  | 9.2   | 5.1  | Metformin + sulfonylurea                                    |                  |
| HARMONY 5               |                |      |      |      |                   | Albiglutide                                | 30 mg weekly       | 54.5  | 9.5   | 49.8     | 8.19 | 0.91 | 32.4  | 5.5  | 8.5   | 3.7  |                                                             |                  |
| HARMONY 5               |                |      |      |      |                   | Placebo                                    |                    | 55.7  | 9.6   | 60.9     | 8.26 | 0.98 | 31.8  | 4.9  | 9.3   | 3.5  |                                                             |                  |
| HARMONY 6               | NCT00976391    | 566  | 2014 | 12   | Multinational     | Albiglutide                                | 30-50 mg weekly    | 54.8  | 9.1   | 46       | 8.5  | 0.9  |       | 11   | 7.7   |      | Insulin ± oral drugs                                        |                  |
| HARMONY 6               |                |      |      |      |                   | Lispro insulin                             | Titrated           | 55.6  | 8.9   | 48       | 8.4  | 0.9  |       | 11   | 9.6   |      |                                                             |                  |
| HARMONY OUTCOMES        | NCT03465515    | 9463 | 2018 | 19.2 | Multinational     | Albiglutide                                | 30-50 mg weekly    | 64.1  | 8.7   | 70       | 8.76 | 1.5  | 32.3  | 5.9  | 14.1  | 70   | 79.1                                                        | Standard therapy |
| HARMONY OUTCOMES        |                |      |      |      |                   | Placebo                                    |                    | 64.2  | 8.7   | 69       | 8.72 | 1.5  | 32.3  | 5.9  | 14.2  | 71   | 78.9                                                        |                  |
| Hartemann-Heurlier      | NCT0159211     | 27   | 2009 | 5.5  | France            | Pioglitazone                               | 30 mg daily        | 62    | 10    | 64.2     | 8.3  | 0.5  | 30    | 5    | 12    |      | Metformin + sulfonylurea                                    |                  |
| Hartemann-Heurlier 2009 |                |      |      |      |                   | NPH insulin                                | 0.2 IU/kg/day      | 58    | 10    | 53.8     | 8.6  | 0.5  | 32    | 4    | 12    |      |                                                             |                  |
| Hartley 2015            | NCT0188980     | 480  | 2015 | 7    | USA               | Glimepiride                                | Titrated           | 70.8  | 4.9   | 40.3     | 7.8  | 0.7  | 29.7  | 5.1  | 9.4   |      | None                                                        |                  |
| Hartley 2015            |                |      |      |      |                   | Sitagliptin                                | 50-100 mg daily    | 70.6  | 4.8   | 47.2     | 7.8  | 0.7  | 29.7  | 4    | 8     |      |                                                             |                  |
| Hasche 1999             | Not applicable | 74   | 1999 | 24   | Germany           | Acarbose                                   | 100-600 mg daily   | 63.8  | 9.8   | 47.2     | 8.5  | 0.7  | 26.1  | 2.9  |       |      | None                                                        |                  |
| Hasche 1999             |                |      |      |      |                   | Placebo                                    |                    | 63.1  | 10.5  | 50       | 8.3  | 0.7  | 26.7  | 2.8  |       |      |                                                             |                  |
| Hattori 2017            | UMIN00004674   | 74   | 2017 | 5.5  | Japan             | Sitagliptin                                | 50 mg daily        | 65.7  | 5.4   | 51.5     | 7.3  | 0.6  | 23.4  | 3.4  |       |      | Sulphonylurea                                               |                  |
| Hattori 2017            |                |      |      |      |                   | Voglibose or miglit 0.2 mg or 150 mg daily |                    | 63.1  | 9.8   | 72.9     | 7    | 0.5  | 24.5  | 3.9  |       |      |                                                             |                  |
| Hattori 2018            | UMIN000021552  | 102  | 2018 | 12   | Japan             | Sitagliptin                                | 10 mg daily        | 57.4  | 12.3  | 74.5     | 7.01 | 1.1  | 30    | 4.9  |       |      | Medical treatment other than SGLT2 inhibitors               |                  |
| Hattori 2018            |                |      |      |      |                   | Placebo                                    |                    | 58.1  | 9.71  | 80.4     | 6.84 | 0.85 | 30    | 4.4  |       |      |                                                             |                  |
| HELA                    | Not provided   | 335  | 2009 | 6    | UK                | Ezetimibe                                  | 10-20 mg daily     | 55.8  | 10.2  | 70.3     | 8.65 | 0.7  | 34.6  | 5.7  | 9     | 13.6 | 2-3 oral drugs (metformin, sulfonylurea, thiazolidinedione) |                  |
| HELA                    |                |      |      |      |                   | Titrated                                   |                    | 56.2  | 7.9   | 66.4     | 8.48 | 0.7  | 33.7  | 4.9  | 8.4   | 18.1 |                                                             |                  |
| Heggie 1995             | Not applicable | 141  | 1995 | 12   | Canada            | Acarbose                                   | Not reported       | 53.7  | 4.8   | 48.6     | 12.2 | 2.1  |       |      |       |      | None                                                        |                  |
| Heggie 1995             |                |      |      |      |                   | Placebo                                    |                    | 55.5  | 5.1   | 46.5     | 12.4 | 2.9  |       |      |       |      |                                                             |                  |
| Heine 2005              | NCT00082381    | 549  | 2005 | 6    | Multinational     | Ezetimibe                                  | 20 mg daily        | 59.8  | 8.8   | 55       | 8.2  | 1    | 31.4  | 4.1  | 9.9   |      | Metformin + sulfonylurea                                    |                  |
| Heine 2005              |                |      |      |      |                   | Insulin glargine                           | Titrated           | 58    | 9.5   | 56.6     | 8.3  | 1    | 31.3  | 4.6  | 9.2   |      |                                                             |                  |
| Heliövaara 2007         | Not provided   | 59   | 2007 | 12   | Multinational     | Glibenclamide                              | 1.75-10.5 mg daily | 57.2  | 9.9   | 73.33333 | 8.35 | 0.66 | 30.5  | 4.9  |       |      | None                                                        |                  |
| Heliövaara 2007         |                |      |      |      |                   | Pioglitazone                               | 30-45 mg daily     | 57.4  | 7.5   | 58.62069 | 8.18 | 0.48 | 32.3  | 7    |       |      |                                                             |                  |
| Henry 2012              | NCT00643851    | 831  | 2012 | 5.5  | USA               | Metformin                                  | 500-2000 mg daily  | 51.8  | 9.8   | 47.3     | 9.2  | 1.3  |       |      | 1.6   |      | None                                                        |                  |
| Henry 2012              |                |      |      |      |                   | Dapagliflozin                              | 5 mg daily         | 52.3  | 10.2  | 45.3     | 9.1  | 1.4  |       |      | 1.6   |      |                                                             |                  |
| Henry 2012              |                |      |      |      |                   | Metformin                                  | 500-2000 mg daily  | 52.7  | 10.4  | 46.6     | 9.1  | 1.3  |       |      | 1.9   |      |                                                             |                  |
| Henry 2012              |                |      |      |      |                   |                                            |                    |       |       |          |      |      |       |      |       |      |                                                             |                  |





|                      |                |     |      |      |                   |                  |                    |       |       |      |      |       |       |      |  |  |  |  |                     |                                                                             |              |                                                                                                                                                       |         |
|----------------------|----------------|-----|------|------|-------------------|------------------|--------------------|-------|-------|------|------|-------|-------|------|--|--|--|--|---------------------|-----------------------------------------------------------------------------|--------------|-------------------------------------------------------------------------------------------------------------------------------------------------------|---------|
| Leonhardt 1991       | Not applicable | 94  | 1991 | 5.5  | Germany           | Acarbose         | 300 mg daily       |       |       |      |      |       |       |      |  |  |  |  | None                |                                                                             |              |                                                                                                                                                       |         |
| Leonhardt 1991       | Not provided   | 575 | 2007 | 5.5  | USA               | Placebo          | 3000 mg daily      | 53    | 10.9  | 51.4 |      |       | 34    | 7.1  |  |  |  |  | Sulphonylurea       |                                                                             |              |                                                                                                                                                       |         |
| Lewin 2007           | Not provided   | 575 | 2007 | 5.5  | USA               | Metformin        | 2000 mg daily      | 53    | 10.5  | 58.9 |      |       | 34    | 6.3  |  |  |  |  | 5                   |                                                                             |              |                                                                                                                                                       |         |
| Lewin 2007           | Not provided   | 575 | 2007 | 5.5  | USA               | Metformin        | 1500 mg daily      | 54    | 10.3  | 53.5 |      |       | 35    | 7.1  |  |  |  |  | 5.1                 |                                                                             |              |                                                                                                                                                       |         |
| Lewin 2007           | Not provided   | 575 | 2007 | 5.5  | USA               | Standard care    |                    | 53    | 10.7  | 54.9 |      |       | 34    | 7.1  |  |  |  |  | 5.8                 |                                                                             |              |                                                                                                                                                       |         |
| Lewin 2015           | NCT01422876    | 398 | 2015 | 5.5  | Multinational     | Liraglutin       | 5 mg daily         | 53.8  | 11.5  | 56.4 | 8.06 | 0.89  | 31.9  | 5.9  |  |  |  |  | 89.5                | None                                                                        |              |                                                                                                                                                       |         |
| Lewin 2015           | Not provided   | 398 | 2015 | 5.5  | Multinational     | Empagliflozin    | 25 mg daily        | 56    | 9.3   | 57.9 | 7.99 | 0.97  | 31.2  | 5.7  |  |  |  |  | 88.5                | None                                                                        |              |                                                                                                                                                       |         |
| Lewin 2015           | Not provided   | 398 | 2015 | 5.5  | Multinational     | Empagliflozin    | 10 mg daily        | 53.9  | 10.5  | 48.5 | 8.05 | 1.03  | 31.5  | 5.7  |  |  |  |  | 88.4                | Metformin ± sulfonylurea ± alpha-glucosidase inhibitor or thiazolidinedione |              |                                                                                                                                                       |         |
| Li 2014              | Not provided   | 203 | 2014 | 5.5  | China             | Vildagliptin     | 100 mg daily       | 46.4  | 9.8   | 60   | 8.56 | 0.77  | 25.9  | 1.8  |  |  |  |  | 5.4                 | Metformin ± sulfonylurea ± alpha-glucosidase inhibitor or thiazolidinedione |              |                                                                                                                                                       |         |
| Li 2014              | Not provided   | 203 | 2014 | 5.5  | China             | Saxagliptin      | 5 mg daily         | 47    | 11.3  | 65   | 8.59 | 0.87  | 26.3  | 2.2  |  |  |  |  | 5.4                 | Metformin ± sulfonylurea ± alpha-glucosidase inhibitor or thiazolidinedione |              |                                                                                                                                                       |         |
| Li 2014              | Not provided   | 203 | 2014 | 5.5  | China             | Liraglutide      | 1.2 mg daily       | 47.9  | 10.8  | 59   | 8.48 | 0.79  | 26.7  | 2.4  |  |  |  |  | 5.8                 | Metformin ± sulfonylurea ± alpha-glucosidase inhibitor or thiazolidinedione |              |                                                                                                                                                       |         |
| Li 2014a             | Not provided   | 42  | 2014 | 7.7  | China             | Insulin glargine | Titrated           |       |       |      |      |       |       |      |  |  |  |  | None or oral agents |                                                                             |              |                                                                                                                                                       |         |
| Li 2014a             | Not provided   | 42  | 2014 | 7.7  | China             | Standard care    |                    |       |       |      |      |       |       |      |  |  |  |  | None or oral agents |                                                                             |              |                                                                                                                                                       |         |
| Li 2017              | Not provided   | 33  | 2017 | 5.5  | China             | Vildagliptin     | 100 mg daily       | 58.9  | 9     | 35.3 | 8.5  | 0.8   | 26.1  | 3.1  |  |  |  |  | 8.6                 | Metformin                                                                   |              |                                                                                                                                                       |         |
| Li 2017              | Not provided   | 33  | 2017 | 5.5  | China             | Placebo          |                    | 59.9  | 7.7   | 56.3 | 8.8  | 0.7   | 25.1  | 3.4  |  |  |  |  | 8.6                 | Metformin                                                                   |              |                                                                                                                                                       |         |
| Li 2019              | Not provided   | 64  | 2019 | 5.5  | China             | Glimepiride      | 2 mg daily         | 47.36 | 9.4   | 51.5 | 7.82 | 0.61  | 26.46 | 3.23 |  |  |  |  | 0.85                | None                                                                        |              |                                                                                                                                                       |         |
| Li 2019              | Not provided   | 64  | 2019 | 5.5  | China             | Saxagliptin      | 5 mg daily         | 46.58 | 8.15  | 46.7 | 7.79 | 0.52  | 27.2  | 4.06 |  |  |  |  | 0.94                | None                                                                        |              |                                                                                                                                                       |         |
| Li 2019a             | NCT01644500    | 23  | 2019 | 6    | China             | Glimepiride      | 0.75-1.5 mg weekly | 53.3  | 6.6   | 60   | 7.91 | 0.98  |       |      |  |  |  |  |                     | None or single oral agent                                                   |              |                                                                                                                                                       |         |
| Li 2019b             | Not provided   | 23  | 2019 | 6    | China             | Dulaglutide      | 100 mg daily       | 54.79 | 5.33  | 53.8 | 8.38 | 0.93  |       |      |  |  |  |  |                     | None or single oral agent                                                   |              |                                                                                                                                                       |         |
| Li 2020              | NCT02655757    | 148 | 2020 | 18   | China             | Stagipitin       | 100 mg daily       | 60.6  | 9.5   | 73.3 | 8.2  | 1.5   | 25.1  | 3.7  |  |  |  |  | 6.3                 | 0.1 or 2 oral agents                                                        |              |                                                                                                                                                       |         |
| Li 2020              | Not provided   | 148 | 2020 | 18   | China             | Control          |                    | 59.7  | 10.3  | 79.7 | 7.9  | 0.9   | 24.9  | 3.1  |  |  |  |  | 9.9                 | 100                                                                         |              |                                                                                                                                                       |         |
| LIBRA                | NCT01270789    | 51  | 2017 | 11.2 | USA               | Liraglutide      | 1.8 mg daily       | 58.9  | 8.7   | 61.5 | 6.2  | 0.4   | 30    | 4.3  |  |  |  |  |                     | 3                                                                           | Metformin    |                                                                                                                                                       |         |
| LIBRA                | Not provided   | 51  | 2017 | 11.2 | USA               | Placebo          |                    | 57.4  | 7.4   | 64   | 6.4  | 0.5   | 30.4  | 5.8  |  |  |  |  |                     | 1.5                                                                         | Metformin    |                                                                                                                                                       |         |
| Lim 2017             | Not applicable | 170 | 2017 | 5.5  | Republic of Korea | Lotiglitazone    | 0.5 mg daily       | 56.36 | 9.29  | 58   | 7.68 | 0.76  | 25.3  | 2.8  |  |  |  |  |                     |                                                                             | 4.3          | None, sulfonylurea, metformin, DPP-4 inhibitor or alpha-glucosidase inhibitor                                                                         |         |
| Lim 2017             | Not applicable | 170 | 2017 | 5.5  | Republic of Korea | Placebo          |                    | 54.72 | 9.7   | 55.2 | 7.86 | 0.86  | 25.1  | 2.2  |  |  |  |  |                     |                                                                             | 4.9          | None, sulfonylurea, metformin, DPP-4 inhibitor or alpha-glucosidase inhibitor                                                                         |         |
| Lin 2003             | Not applicable | 65  | 2003 | 5.5  | Multinational     | Acarbose         | 300 mg daily       | 57.7  | 7.3   | 53.1 | 9.01 | 1.2   | 24.8  | 3    |  |  |  |  |                     | 7                                                                           | Sulfonylurea |                                                                                                                                                       |         |
| Lin 2003             | Not applicable | 65  | 2003 | 5.5  | Multinational     | Placebo          |                    | 55.4  | 8.5   | 37.5 | 8.99 | 0.95  | 25.1  | 2.8  |  |  |  |  |                     |                                                                             | 5            | Sulfonylurea                                                                                                                                          |         |
| Liraglutin-LTC Trial | NCT02061969    | 140 | 2018 | 6    | USA               | Liraglutin       | 5 mg daily         | 68.0  | 13.0  | 48.0 | 7.9  | 2.2   | 29.7  | 7.0  |  |  |  |  |                     |                                                                             | 10.9         | Metformin                                                                                                                                             |         |
| Liraglutin-LTC Trial | Not provided   | 140 | 2018 | 6    | USA               | Insulin glargine |                    | 71.5  | 13.0  | 34.0 | 7.8  | 2.2   | 30.0  | 8.0  |  |  |  |  |                     |                                                                             | 10.6         | Metformin                                                                                                                                             |         |
| Lindström 2000       | Not applicable | 107 | 2000 | 5.5  | Finland           | Acarbose         | 300 mg daily       | 58.3  | 9     |      | 9.8  | 1.3   | 29.1  | 3.3  |  |  |  |  |                     |                                                                             | 6.3          | Biguanide ± sulfonylurea                                                                                                                              |         |
| Lindström 2000       | Not applicable | 107 | 2000 | 5.5  | Finland           | Placebo          |                    | 61.8  | 5.2   |      | 10.1 | 1.5   | 28.3  | 3.7  |  |  |  |  |                     |                                                                             | 6            | Biguanide ± sulfonylurea                                                                                                                              |         |
| Lingvay 2018         | NCT0461589     | 641 | 2018 | 6    | Multinational     | Liraglutide      | 1.8 mg daily       | 55.8  | 9.2   | 33   | 8.1  | 0.8   | 32.1  | 4.5  |  |  |  |  |                     |                                                                             | 6.6          | None or metformin                                                                                                                                     |         |
| Lingvay 2018         | Not provided   | 641 | 2018 | 6    | Multinational     | Liraglutide      | 1.2 mg daily       | 53.7  | 11.4  | 53.1 | 8.1  | 0.9   | 33.3  | 4.3  |  |  |  |  |                     |                                                                             | 6.6          | None or metformin                                                                                                                                     |         |
| Lingvay 2018         | Not provided   | 641 | 2018 | 6    | Multinational     | Liraglutide      | 0.6 mg daily       | 59.5  | 9.8   | 50   | 8.1  | 0.8   | 33    | 4    |  |  |  |  |                     |                                                                             | 6.8          | None or metformin                                                                                                                                     |         |
| Lingvay 2018         | Not provided   | 641 | 2018 | 6    | Multinational     | Liraglutide      | 0.3 mg daily       | 57.2  | 10.8  | 45.3 | 8.1  | 0.9   | 32.9  | 3.9  |  |  |  |  |                     |                                                                             | 8.1          | None or metformin                                                                                                                                     |         |
| Lingvay 2018         | Not provided   | 641 | 2018 | 6    | Multinational     | Semaglutide      | 0.3 mg daily       | 54.8  | 9.7   | 50.8 | 8.2  | 0.8   | 33.1  | 4.7  |  |  |  |  |                     |                                                                             | 6.5          | None or metformin                                                                                                                                     |         |
| Lingvay 2018         | Not provided   | 641 | 2018 | 6    | Multinational     | Semaglutide      | 0.2 mg daily       | 58.4  | 8.6   | 50.8 | 8    | 0.8   | 32.8  | 4.5  |  |  |  |  |                     |                                                                             | 7.2          | None or metformin                                                                                                                                     |         |
| Lingvay 2018         | Not provided   | 641 | 2018 | 6    | Multinational     | Semaglutide      | 0.1 mg daily       | 57.5  | 10    | 55.6 | 7.9  | 0.8   | 32.4  | 4.5  |  |  |  |  |                     |                                                                             | 8.1          | None or metformin                                                                                                                                     |         |
| Lingvay 2018         | Not provided   | 641 | 2018 | 6    | Multinational     | Semaglutide      | 0.05 mg daily      | 57.5  | 9.8   | 51.6 | 7.9  | 0.7   | 32.3  | 4.6  |  |  |  |  |                     |                                                                             | 6.5          | None or metformin                                                                                                                                     |         |
| Lingvay 2018         | Not provided   | 641 | 2018 | 6    | Multinational     | Placebo          |                    | 57.1  | 9.2   | 55.8 | 8.1  | 0.9   | 32.8  | 4.2  |  |  |  |  |                     |                                                                             | 7.2          | None or metformin                                                                                                                                     |         |
| LIPER2               | EudraCT number | 24  | 2019 | 6    | Spain             | Liraglutide      | 1.8 mg daily       | 63.2  | 9.7   | 41.7 | 8    | 0.46  | 35.8  | 6.2  |  |  |  |  |                     |                                                                             | 8.7          | Metformin if tolerated and not contraindicated) or a maximum of two intermediate- or long-acting insulin injections per day, or a combination of both |         |
| LIPER2               | EudraCT number | 24  | 2019 | 6    | Spain             | Placebo          |                    | 52.6  | 13.8  | 33.3 | 8.4  | 0.8   | 34.98 | 6.2  |  |  |  |  |                     |                                                                             | 8.7          | Metformin if tolerated and not contraindicated) or a maximum of two intermediate- or long-acting insulin injections per day, or a combination of both |         |
| LIRA-ADD25GLT2       | NCT02964247    | 303 | 2020 | 6.0  | Multinational     | Liraglutide      | 1.8 mg daily       | 54.7  | 10.1  | 62.0 | 8.0  | 0.7   | 32.0  | 6.0  |  |  |  |  |                     |                                                                             | 10.1         | Metformin ± SGLT-2 inhibitor                                                                                                                          |         |
| LIRA-ADD25GLT2       | Not provided   | 303 | 2020 | 6.0  | Multinational     | Placebo          |                    | 56.0  | 9.9   | 58.0 | 8.0  | 0.6   | 32.6  | 6.5  |  |  |  |  |                     |                                                                             | 9.6          | Metformin ± SGLT-2 inhibitor                                                                                                                          |         |
| Liraglutide-Detemir  | NCT020856986   | 323 | 2012 | 6    | Multinational     | Insulin detemir  | Titrated           | 56.8  | 9.4   | 54.3 | 7.6  | 0.6   | 34.9  | 6.3  |  |  |  |  |                     |                                                                             | 8.6          | Metformin ± sulfonylurea                                                                                                                              |         |
| Liraglutide-Detemir  | Not provided   | 323 | 2012 | 6    | Multinational     | Control          |                    | 57.3  | 9.8   | 55.3 | 7.6  | 0.7   | 33.9  | 6.7  |  |  |  |  |                     |                                                                             | 8.5          | Metformin ± sulfonylurea                                                                                                                              |         |
| LIRA-RENAL           | NCT01620489    | 277 | 2016 | 6    | Multinational     | Liraglutide      | 1.8 mg daily       | 68    | 8.3   | 53.6 | 8.08 | 0.792 | 33.4  | 5.4  |  |  |  |  |                     |                                                                             | 15.9         | Monotherapy or dual therapy combinations with metformin, sulfonylurea, thiazolidinedione, or insulin                                                  |         |
| LIRA-RENAL           | Not provided   | 277 | 2016 | 6    | Multinational     | Placebo          |                    | 66.3  | 8     | 47.4 | 8    | 0.853 | 34.5  | 5.4  |  |  |  |  |                     |                                                                             | 14.2         | Monotherapy or dual therapy combinations with metformin, sulfonylurea, thiazolidinedione, or insulin                                                  |         |
| LIRA-SWITCH          | NCT01907854    | 406 | 2016 | 5.5  | Multinational     | Stagipitin       | 100 mg daily       | 56.5  | 9.7   | 61   | 8.2  | 0.6   | 32.2  | 6.2  |  |  |  |  |                     |                                                                             | 7.6          | Metformin                                                                                                                                             |         |
| LIRA-SWITCH          | Not provided   | 406 | 2016 | 5.5  | Multinational     | Liraglutide      | 1.8 mg daily       | 56.3  | 10.6  | 57.4 | 8.3  | 0.6   | 31.7  | 6.3  |  |  |  |  |                     |                                                                             | 7.9          | Metformin                                                                                                                                             |         |
| Liu 2013             | NCT01195090    | 119 | 2013 | 5.5  | Taiwan            | Pioglitazone     | 30 mg daily        | 58.1  | 8.4   | 38.3 | 8.54 | 0.97  | 25.7  | 3.7  |  |  |  |  |                     |                                                                             | 7.8          | Metformin or sulfonylurea                                                                                                                             |         |
| Liu 2013             | Not provided   | 119 | 2013 | 5.5  | Taiwan            | Stagipitin       | 100 mg daily       | 60.1  | 8.9   | 36.7 | 8.27 | 0.86  | 26.6  | 4.6  |  |  |  |  |                     |                                                                             | 7.8          | Metformin or sulfonylurea                                                                                                                             |         |
| Liu 2014             | Not provided   | 146 | 2014 | 14   | China             | Pioglitazone     | 30 mg daily        | 60.7  | 12.25 | 74.3 | 6.41 | 1.83  |       |      |  |  |  |  |                     |                                                                             |              | Unclear                                                                                                                                               |         |
| Liu 2014             | Not provided   | 146 | 2014 | 14   | China             | Placebo          |                    | 62.25 | 12.29 | 65.8 | 6.59 | 1.45  |       |      |  |  |  |  |                     |                                                                             |              |                                                                                                                                                       | Unclear |
| Liu 2020             | NCT03303730    | 71  | 2020 | 5.5  | China             | Ezetimibe        | 20 mcg daily       | 47.6  | 10.1  | 54.3 | 8.3  | 0.9   | 28.5  | 3.0  |  |  |  |  |                     |                                                                             | 0.3          | None                                                                                                                                                  |         |
| Liu 2020             | Not provided   | 71  | 2020 | 5.5  | China             | Insulin glargine |                    | 50.6  | 11.8  | 52.8 | 8.6  | 0.9   | 27.8  | 3.1  |  |  |  |  |                     |                                                                             | 0.5          | None                                                                                                                                                  |         |
| Liutkus 2010         | Not provided   | 165 | 2010 | 6    | Multinational     | Ezetimibe        | 20 mcg daily       | 55    | 8     | 60   | 8.2  | 0.9   | 34    | 6    |  |  |  |  |                     |                                                                             | 6.3          | Metformin and thiazolidinedione                                                                                                                       |         |
| Liutkus 2010         | Not provided   | 165 | 2010 | 6    | Multinational     | Placebo          |                    | 54    | 9     | 57   | 8.3  | 0.9   | 33    | 5    |  |  |  |  |                     |                                                                             | 6.4          | Metformin and thiazolidinedione                                                                                                                       |         |
| Lixian-G             | NCT02787551    | 514 | 2019 | 6    | Multinational     | Insulin glargine | Titrated           | 59.2  | 9.6   | 49   | 7.9  | 0.6   | 32.8  | 4.4  |  |  |  |  |                     |                                                                             | 11.2         | GLP-1RA in combination with metformin with or without SGLT2 inhibitor with or without pioglitazone                                                    |         |
| Lixian-G             | Not provided   | 514 | 2019 | 6    | Multinational     | Control          |                    | 60    | 10.3  | 56   | 7.9  | 0.5   | 33    | 4.4  |  |  |  |  |                     |                                                                             | 11           | GLP-1RA in combination with metformin with or without SGLT2 inhibitor with or without pioglitazone                                                    |         |
| Lixian JP-L          | NCT02752412    | 512 | 2020 | 6.0  | Japan             | Lixisenatide     | 20 mcg daily       | 59.4  | 10.5  | 62.4 | 8.2  | 0.5   | 25.3  | 4.2  |  |  |  |  |                     |                                                                             | 11.9         | Insulin glargine + metformin                                                                                                                          |         |
| Lixian JP-L          | Not provided   | 512 | 2020 | 6.0  | Japan             | Control          |                    | 60.2  | 10.4  | 57.2 | 8.3  | 0.5   | 24.9  | 3.9  |  |  |  |  |                     |                                                                             | 12.0         | Insulin glargine + metformin                                                                                                                          |         |
| Lixian JP-O1         | NCT0479890     | 321 | 2020 | 6.0  | Japan             | Insulin glargine | Control            | 58.3  | 9.9   | 64.6 | 8.4  | 0.6   | 26.8  | 4.4  |  |  |  |  |                     |                                                                             | 8.1          | Lixisenatide, and oral antidiabetic drugs except DPP-4 inhibitors. Other drugs decreased by 50% or discontinued                                       |         |
| Lixian JP-O1         | Not provided   | 321 | 2020 | 6.0  | Japan             | Control          |                    | 57.7  |       |      |      |       |       |      |  |  |  |  |                     |                                                                             |              |                                                                                                                                                       |         |

|                     |                |      |      |     |               |                     |                   |       |      |       |      |      |       |      |      |      |                                                                                      |                                               |
|---------------------|----------------|------|------|-----|---------------|---------------------|-------------------|-------|------|-------|------|------|-------|------|------|------|--------------------------------------------------------------------------------------|-----------------------------------------------|
| Mathieu 2015        |                |      |      |     |               | Placebo             |                   | 58.3  | 9.7  | 49.8  | 8.8  | 1    | 32.2  | 6.6  | 13.7 |      |                                                                                      |                                               |
| Mathieu 2016        | NCT01646320    | 320  | 2016 | 12  | Mexico        | Dasagliatin         | 10 mg daily       | 55.2  | 8.6  | 43.7  | 8.24 | 0.96 | 31.2  | 4.7  | 7.2  | 93.5 | Metformin ± DPP-4 inhibitor                                                          |                                               |
| Mathieu 2016        |                |      |      |     |               | Placebo             |                   | 55    | 9.6  | 47.5  | 8.17 | 0.98 | 32.2  | 5.3  | 8    | 91.6 |                                                                                      |                                               |
| Matthaei 2015       | NCT01619099    | 322  | 2015 | 12  | Multinational | Saxagliptin         | 5 mg daily        | 54.7  | 9.8  | 47.7  | 7.97 | 0.83 | 31.4  | 5.2  | 8.1  | 92.8 | Metformin + dapagliflozin                                                            |                                               |
| Matthaei 2015       |                |      |      |     |               | Placebo             |                   | 54.5  | 9.3  | 46.9  | 7.86 | 0.93 | 31.4  | 5.3  | 7.4  | 93.9 |                                                                                      |                                               |
| Matthaei 2015a      | NCT01392677    | 218  | 2015 | 5.5 | Multinational | Dasagliatin         | 10 mg daily       | 61.1  | 9.7  | 42.6  | 8.08 | 0.91 | 31.9  | 4.8  | 9.3  | 84.3 | Metformin + sulfonyleurea                                                            |                                               |
| Matthaei 2015a      |                |      |      |     |               | Placebo             |                   | 60.8  | 9.2  | 55.6  | 8.24 | 0.97 | 32    | 4.6  | 8.6  | 88   |                                                                                      |                                               |
| Matthews 2005       | Not applicable | 630  | 2005 | 12  | Multinational | Glitazone           | 80-320 mg daily   | 57    | 9    | 49.2  | 8.53 | 0.89 | 32.6  | 5.8  | 5.5  |      | Metformin                                                                            |                                               |
| Matthews 2005       |                |      |      |     |               | Pioglitazone        | 15-45 mg daily    | 56    | 9.2  | 50.8  | 8.71 | 1    | 32.6  | 5    | 5.8  |      |                                                                                      |                                               |
| Matthews 2010       | Eudract 2004-  | 3118 | 2010 | 24  | Multicentre   | Glimepiride         | 2-6 mg daily      | 57.5  | 9.19 | 53.9  | 7.3  | 0.7  | 31.7  | 5.3  | 5.7  |      | Metformin                                                                            |                                               |
| Matthews 2010       |                |      |      |     |               | Vildagliptin        | 50 mg twice daily | 57.5  | 9.07 | 53.1  | 7.3  | 0.7  | 31.9  | 5.3  | 5.7  |      |                                                                                      |                                               |
| Mattoo 2005         | Not applicable | 289  | 2005 | 6   | Multinational | Pioglitazone        | 30 mg daily       | 58.8  | 11.4 | 43.7  | 8.85 | 1.3  | 32.5  | 5.8  | 11.6 |      | None or oral agents                                                                  |                                               |
| Mattoo 2005         |                |      |      |     |               | Placebo             |                   | 58.9  | 6.9  | 42.9  | 8.79 | 1.2  | 31.8  | 5    | 13.4 |      |                                                                                      |                                               |
| McCluskey 2004      | Not applicable | 40   | 2004 | 6   | USA           | Glimepiride         | 2-8 mg daily      | 60.2  | 7.8  | 44    | 7.9  | 0.6  |       |      | 7.2  |      | Rosiglitazone                                                                        |                                               |
| McCluskey 2004      |                |      |      |     |               | Placebo             |                   | 50.8  | 9.7  | 40    | 8.4  | 0.7  |       |      | 4.6  |      |                                                                                      |                                               |
| McGill 2013         | Not provided   | 133  | 2013 | 12  | Multinational | Linagliptin         | 5 mg daily        | 64    | 10.9 | 66.2  | 8.2  | 1.1  | 33.3  | 5.8  |      | 22.1 | Insulin, sulfonyleurea, glinides, pioglitazone, and $\alpha$ -glucosidase inhibitors |                                               |
| McGill 2013         |                |      |      |     |               | Placebo             |                   | 64.9  | 9.6  | 53.8  | 8.2  | 0.9  | 31.7  | 5.9  |      | 25.1 |                                                                                      |                                               |
| McGuire 2010        | NCT0044762     | 150  | 2010 | 6   | USA           | Rosiglitazone       | 4-8 mg daily      | 57    | 8.7  | 57.4  | 7.6  | 1.8  | 34.1  | 6.4  | 9.5  |      | Existing treatment except thiazolidinediones                                         |                                               |
| McGuire 2010        |                |      |      |     |               | Placebo             |                   | 55.7  | 8.3  | 61.1  | 7.6  | 1.8  | 34.1  | 7.3  | 8.7  |      |                                                                                      |                                               |
| MDI Liraglutide     | Eudract 2012-  | 124  | 2015 | 5.5 | Sweden        | Liraglutide         | 1.8 mg daily      | 63.7  | 8.2  | 63.5  | 9    | 1    | 33.7  | 4.3  | 17.3 | 9.4  | Insulin                                                                              |                                               |
| MDI Liraglutide     |                |      |      |     |               | Placebo             |                   | 63.5  | 7.7  | 66.7  | 9    | 1.1  | 33.5  | 4    | 17   | 16.7 |                                                                                      |                                               |
| Meneghini 2010      | Not provided   | 247  | 2010 | 11  | USA           | Pioglitazone        | 45 mg daily       | 51.8  | 9.8  | 49    | 9.5  | 1.4  | 33.5  | 7.1  | 5.8  |      | Metformin or sulphonyurea or no treatment                                            |                                               |
| Meneghini 2010      |                |      |      |     |               | Insulin glargine    | Titrated          | 52.9  | 10.6 | 48    | 9.4  | 1.2  | 33.7  | 6.9  | 6.5  |      |                                                                                      |                                               |
| Menhely 2000        | Not applicable | 45   | 2000 | 12  | Canada        | Acarbose            | 300 mg daily      | 68    | 4.7  | 67    | 7.3  | 0.5  | 28    | 4.7  |      |      | None                                                                                 |                                               |
| Menhely 2000        |                |      |      |     |               | Placebo             |                   | 70    | 4.8  |       | 7    | 1    | 29    | 4.8  |      |      |                                                                                      |                                               |
| Milovanova 2019     | Not provided   | 42   | 2019 | 36  | Russia        | Linagliptin         | 5 mg daily        |       |      |       |      |      |       |      |      |      |                                                                                      | Hypoglycaemic drugs except SGLT-2 inhibitors  |
| Milovanova 2019     |                |      |      |     |               | Control             |                   |       |      |       |      |      |       |      |      |      |                                                                                      |                                               |
| Mita 2007           | Not provided   | 70   | 2007 | 12  | Japan         | Nateglinide         | 270 mg daily      | 61.3  | 8.3  | 52.9  | 6.13 | 0.37 | 23.6  | 2.7  | 4.46 |      | None                                                                                 |                                               |
| Mita 2007           |                |      |      |     |               | Control             |                   | 61.3  | 8.3  | 52.9  | 6.04 | 0.37 | 23.6  | 2.7  | 4.75 |      |                                                                                      |                                               |
| Mita 2019           | UMIN000022953  | 43   | 2019 | 5.5 | Japan         | Metformin           | 2250 mg daily     | 58.1  | 13.8 | 59    | 7.5  | 1.5  | 26.3  | 4.9  | 3.3  | 92   | None or insulin                                                                      |                                               |
| Mita 2019           |                |      |      |     |               | Placebo             |                   | 61.3  | 8.7  | 62    | 7.1  | 0.7  | 25.7  | 4.5  | 3.4  | 76.7 |                                                                                      |                                               |
| Mitrakou 1998       | Not applicable | 120  | 1998 | 5.5 | Greece        | Miglitol            | 300 mg daily      | 57.4  | 5.6  | 48.3  | 9.9  | 0.5  | 24.4  | 3.1  | 8.5  |      | Insulin                                                                              |                                               |
| Mitrakou 1998       |                |      |      |     |               | Placebo             |                   | 57.4  | 5.8  | 61.7  | 9.9  | 0.4  | 24.5  | 4.9  | 7.9  |      |                                                                                      |                                               |
| Miyagawa 2015       | NCT01558271    | 492  | 2015 | 6   | Japan         | Dulaglutide         | 0.75 mg weekly    | 57.2  | 9.6  | 81    | 8.15 | 0.77 | 25.6  | 3.6  |      |      | None                                                                                 |                                               |
| Miyagawa 2015       |                |      |      |     |               | Liraglutide         | 0.9 mg daily      | 57.9  | 10.4 | 83    | 8.08 | 0.89 | 25.5  | 3.5  | 6.3  |      |                                                                                      |                                               |
| Miyagawa 2015       |                |      |      |     |               | Placebo             |                   | 57.7  | 8.3  | 79    | 8.2  | 0.83 | 25.2  | 3.2  | 6.3  |      |                                                                                      |                                               |
| Miyazaki 2002       | Not applicable | 58   | 2002 | 6   | USA           | Pioglitazone        | 45 mg daily       | 55    | 6.6  | 45.4  | 9.1  | 1    | 30.4  | 3.3  |      |      | None                                                                                 |                                               |
| Miyazaki 2002       |                |      |      |     |               | Pioglitazone        | 30 mg daily       | 51    | 6.6  | 72.7  | 8.5  | 1.7  | 32.9  | 5.3  |      |      |                                                                                      |                                               |
| Miyazaki 2002       |                |      |      |     |               | Pioglitazone        | 15 mg daily       | 57    | 13.9 | 66.6  | 8    | 1    | 30.8  | 4.5  |      |      |                                                                                      |                                               |
| Miyazaki 2002       |                |      |      |     |               | Pioglitazone        | 7.5 mg daily      | 51    | 10.8 | 76.9  | 8.9  | 1.4  | 31.3  | 4.3  |      |      |                                                                                      |                                               |
| Miyazaki 2002       |                |      |      |     |               | Placebo             |                   | 58    | 9.9  | 27.3  | 8.6  | 1.7  | 32.8  | 5.3  |      |      |                                                                                      |                                               |
| Mokta 2018          | Not provided   | 217  | 2018 | 30  | India         | Glimepiride         | 2 mg daily        | 48.41 | 8.87 | 59    | 9.03 | 1.24 | 26.4  | 7.4  |      |      | Metformin                                                                            |                                               |
| Mokta 2018          |                |      |      |     |               | Liraglutide         | 100 mg daily      | 50.88 | 9.3  | 60    | 9.07 | 0.67 | 26.81 | 3.15 |      |      |                                                                                      |                                               |
| Moretto 2008        | NCT00381342    | 233  | 2008 | 5.5 | USA           | Exenatide           | 10 mcg daily      | 54    | 10   | 63    | 7.9  | 1    | 31    | 5    | 2    |      | None                                                                                 |                                               |
| Moretto 2008        |                |      |      |     |               | Exenatide           | 5 mcg daily       | 55    | 10   | 52    | 7.8  | 1    | 32    | 5    | 2    |      |                                                                                      |                                               |
| Moretto 2008        |                |      |      |     |               | Placebo             |                   | 53    | 9    | 55    | 7.8  | 0.9  | 32    | 5    | 1    |      |                                                                                      |                                               |
| Morino 2018         | Not provided   | 46   | 2018 | 5.5 | Japan         | Insulin             | Control           |       |      |       | 8.1  | 0.9  |       |      |      |      | Insulin                                                                              |                                               |
| Morino 2018         |                |      |      |     |               | Control             |                   |       |      |       | 8.3  | 0.7  |       |      |      |      |                                                                                      |                                               |
| Moriwaki 2018       | UMIN000012562  | 28   | 2018 | 5.5 | Japan         | Sitagliptin         | 100 mg daily      | 69    | 9    | 79    | 6.64 | 0.51 |       |      | 3.1  | 100  | 71                                                                                   | None or fixed doses of glucose-lowering drugs |
| Moriwaki 2018       |                |      |      |     |               | Voglibose           | 0.9 mg daily      | 68    | 10   | 71    | 6.6  | 0.46 |       |      | 1.3  | 100  | 73                                                                                   |                                               |
| Moses 2014          | Not provided   | 257  | 2014 | 5.5 | Multinational | Saxagliptin         | 5 mg daily        | 57.2  | 9.6  | 62    | 8.4  | 0.7  | 29.4  | 5.3  |      |      | Metformin + sulfonyleurea                                                            |                                               |
| Moses 2014          |                |      |      |     |               | Placebo             |                   | 56.8  | 11.5 | 57.8  | 8.2  | 0.8  | 29.1  | 4.9  |      |      |                                                                                      |                                               |
| Moses 2016          | NCT01076075    | 427  | 2016 | 5.5 | Multinational | Sitagliptin         | 100 mg daily      | 54.4  | 9.6  | 45.2  | 8.4  | 0.8  | 29.5  | 4.8  | 7.5  |      | Metformin + sulfonyleurea                                                            |                                               |
| Moses 2016          |                |      |      |     |               | Placebo             |                   | 55.4  | 10.2 | 46.2  | 8.4  | 0.9  | 28.8  | 5    | 8    |      |                                                                                      |                                               |
| Mu 2017             | NCT01708902    | 436  | 2017 | 5.5 | China         | Metformin           | 2000 mg daily     | 51.4  | 10.4 | 63.2  | 8.6  | 1    | 25.1  | 3.3  |      |      | None                                                                                 |                                               |
| Mu 2017             |                |      |      |     |               | Metformin           | 1000 mg daily     | 52.1  | 9.6  | 62.8  | 8.7  | 1.1  | 25.8  | 3.3  | 9.8  |      |                                                                                      |                                               |
| Mu 2017             |                |      |      |     |               | Liraglutide         | 5 mg daily        | 50.8  | 10.5 | 51.7  | 8.7  | 0.9  | 26.2  | 3.9  | 9.2  |      |                                                                                      |                                               |
| Müller-Wieland 2018 | NCT02471404    | 939  | 2018 | 12  | Multinational | Glimepiride         | 6 mg daily        | 58.6  | 8.4  | 66.5  | 8.3  | 0.8  | 33    | 5.1  | 6.7  |      | Metformin                                                                            |                                               |
| Müller-Wieland 2018 |                |      |      |     |               | Dasagliatin         | 10 mg daily       | 57.4  | 9.4  | 64.3  | 8.3  | 0.7  | 33.1  | 5.2  | 6.9  |      |                                                                                      |                                               |
| Nakamura 2001       | Not applicable | 28   | 2001 | 6   | Japan         | Pioglitazone        | 30mg daily        |       |      |       | 8.4  | 1.3  |       |      |      |      | 104                                                                                  | Sulfonyleurea                                 |
| Nakamura 2001       |                |      |      |     |               | Placebo             |                   |       |      |       | 8    | 1    |       |      |      |      | 106                                                                                  |                                               |
| Nakamura 2004       | Not applicable | 45   | 2004 | 12  | Japan         | Glibenclamide       | 5-20 mg daily     | 55    | 11.5 | 53.3  | 7.9  | 1.4  |       |      |      |      | None                                                                                 |                                               |
| Nakamura 2004       |                |      |      |     |               | Pioglitazone        | 30 mg daily       | 56.5  | 12   | 60    | 7.9  | 1.3  |       |      |      |      | 17.5                                                                                 |                                               |
| Nakamura 2004       |                |      |      |     |               | Voglibose           | 0.6 mg daily      | 55    | 11   | 53.3  | 8.1  | 1.6  |       |      |      |      | 15.8                                                                                 |                                               |
| Nakamura 2006       | Not provided   | 68   | 2006 | 12  | Japan         | Glibenclamide       | 5-20 mg daily     | 53.5  | 12   | 55.6  | 7.8  | 1.3  |       |      |      | 16.5 | 109                                                                                  | 136.5                                         |
| Nakamura 2006       |                |      |      |     |               | Pioglitazone        | 30 mg daily       | 56    | 13   | 52.9  | 8    | 1.4  |       |      |      | 16   | 100                                                                                  | 142.5                                         |
| Nakamura 2006       |                |      |      |     |               | Voglibose           | 0.6 mg daily      | 55    | 12.8 | 58.8  | 7.6  | 1.3  |       |      |      | 16.2 | 117                                                                                  | 140.8                                         |
| Nakamura 2006       |                |      |      |     |               | Nateglinide         | 270mg daily       | 53.5  | 12.2 | 56.25 | 7.7  | 1.4  |       |      |      | 16.6 | 114                                                                                  | 134.6                                         |
| Nar 2009            | Not provided   | 34   | 2009 | 6   | Turkey        | Metformin           | 850-1700 mg daily | 49.4  | 8.6  | 21.1  | 6.5  | 1.4  | 31    | 4    | 0    |      |                                                                                      | None                                          |
| Nar 2009            |                |      |      |     |               | Control             |                   | 44.5  | 5.9  | 33.3  | 6.1  | 1.1  | 33.7  | 6    | 0    |      |                                                                                      |                                               |
| Nathan 1988         | Not applicable | 31   | 1988 | 9   | USA           | Glyburide           | 10.5 mg daily     | 50.3  | 5.9  | 56.3  | 10.5 | 2.41 | 30.2  | 5.7  | 5.9  |      | None                                                                                 |                                               |
| Nathan 1988         |                |      |      |     |               | NPH insulin         | Titrated          | 53.5  | 7.1  | 53.3  | 10.3 | 1.52 | 29.6  | 5.1  | 3.7  |      |                                                                                      |                                               |
| Nauck 2007a         | Not provided   | 501  | 2007 | 12  | Multinational | Exenatide           | 10-20 mcg daily   | 59    | 9    | 53    | 8.6  | 1    | 30.6  | 4    | 9.8  |      | Metformin + sulfonyleurea                                                            |                                               |
| Nauck 2007a         |                |      |      |     |               | Biphasic Insulin As | Titrated          | 58    | 9    | 49    | 8.6  | 1.1  | 30.2  | 4.2  | 10   |      |                                                                                      |                                               |
| Nauck 2007b         | NCT0094770     | 1172 | 2007 | 12  | Multinational | Glipizide           | 5-20 mg daily     | 56.5  | 9.8  | 61.3  | 7.6  | 0.9  | 31.3  | 5.2  | 6.2  |      | None, monotherapy or metformin + monotherapy                                         |                                               |
| Nauck 2007b         |                |      |      |     |               | Sitagliptin         | 100 mg daily      | 58.8  | 9.3  | 57.1  | 7.7  | 0.9  | 31.5  | 5    | 6.5  |      |                                                                                      |                                               |
| Nauck 2009          | NCT00286442    | 527  | 2009 | 6   | Multinational | Atoglitatin         | 25mg daily        | 54    | 11   | 54.3  | 7.9  | 0.8  | 32    | 5    | 6    |      | Metformin                                                                            |                                               |
| Nauck 2009          |                |      |      |     |               | Placebo             |                   | 55    | 11   | 47.4  | 7.9  | 0.7  | 32    | 5    | 6    |      |                                                                                      |                                               |
| Nauck 2009          |                |      |      |     |               | Placebo             |                   | 56    | 11   | 48    | 8    | 0.9  | 32    | 6    | 6    |      |                                                                                      |                                               |
| Nauck 2011          |                |      |      |     |               |                     |                   |       |      |       |      |      |       |      |      |      |                                                                                      |                                               |

|                            |                |      |      |     |                   |                     |                    |       |           |       |       |         |       |           |       |                         |                                                                                                                                                                         |                                                        |
|----------------------------|----------------|------|------|-----|-------------------|---------------------|--------------------|-------|-----------|-------|-------|---------|-------|-----------|-------|-------------------------|-------------------------------------------------------------------------------------------------------------------------------------------------------------------------|--------------------------------------------------------|
| Ohira 2014                 |                |      |      |     |                   | Pioglitazone        | 15 mg daily        |       | 63.7      | 7.94  | 63.3  | 8.54    | 1.06  | 23.61     | 4.06  |                         |                                                                                                                                                                         |                                                        |
| Omarigliptin Study         | NCT01697592    | 585  | 2017 | 5.5 | Japan             | Omarigliptin        | 25 mg daily        |       |           |       |       |         |       |           |       |                         | Stable dose of a sulfonylurea, glinide, biguanide, thiazolidinedione, or alpha glucosidase inhibitor or dual treatment or additional other treatment depending on HbA1C |                                                        |
| Omarigliptin Protocol 2010 | NCT01703221    | 394  | 2017 | 5.5 | Japan             | Omarigliptin        | 25 mg daily        | 60    | 11        | 62.7  | 7.9   | 0.7     | 25.2  | 3.7       | 7.4   |                         | None                                                                                                                                                                    |                                                        |
| Omarigliptin Protocol 2010 |                |      |      |     |                   | Sitagliptin         | 50 mg daily        | 60    | 9         | 69.7  | 8     | 0.8     | 25.4  | 4.2       | 7.4   |                         |                                                                                                                                                                         |                                                        |
| Omarigliptin Protocol 2010 |                |      |      |     |                   | Placebo             |                    | 61    | 9         | 68.7  | 8.1   | 0.7     | 24.3  | 3.3       | 8.6   |                         |                                                                                                                                                                         |                                                        |
| Onoue 2020                 | UMIN000014531  | 24   | 2020 | 5.5 | Japan             | Amarigliptin        | 400 mg daily       | 64.8  | 12.4      | 46.0  | 7.1   | 0.5     | 20.9  | 6.0       | 7.7   |                         | No or stable glucose lowering therapy                                                                                                                                   |                                                        |
| Onoue 2020                 |                |      |      |     |                   | Control             |                    | 62.9  | 14.7      | 33.0  | 7.3   | 0.5     | 25.6  | 3.5       | 7.4   |                         |                                                                                                                                                                         |                                                        |
| Onuchin 2010               | None           | 184  | 2010 | 12  | Russia            | Metformin           | 2500-5000 mg daily | 59.4  | 9.2       | 0     | 10.4  | 1.6     | 32.8  | 6.4       | 7     |                         | None                                                                                                                                                                    |                                                        |
| Onuchin 2010               |                |      |      |     |                   | Long acting insulin | Titrated           | 61.1  | 8.5       | 0     | 11.03 | 1.9     | 31.1  | 7.6       | 9     |                         |                                                                                                                                                                         |                                                        |
| Onuchin 2010               |                |      |      |     |                   | Gliclazide          | 40-90 mg daily     | 62.3  | 8.5       | 0     | 10.6  | 1.8     | 32.1  | 4.6       | 7     |                         | Metformin                                                                                                                                                               |                                                        |
| Onuchin 2010               |                |      |      |     |                   | Long acting insulin | Titrated           | 61.4  | 8         | 0     | 10.8  | 1.6     | 32.3  | 5.7       | 8     |                         |                                                                                                                                                                         |                                                        |
| Osman 2004                 | Not applicable | 16   | 2004 | 6   | USA               | Rosiglitazone       | 8mg daily          | 53.5  | 14.3      | 10.3  | 3.2   |         |       |           | 7.75  | 100                     | Treatment not otherwise specified                                                                                                                                       |                                                        |
| Osman 2004                 |                |      |      |     |                   | Placebo             |                    | 57.3  | 12        | 62.5  | 8.7   | 1.9     |       |           | 3.25  | 100                     |                                                                                                                                                                         |                                                        |
| Ovalle 2004                | Not applicable | 17   | 2004 | 6   | USA               | Rosiglitazone       | 8 mg daily         | 47    | 12        | 9     | 8     | 0.7     | 31.5  | 6.9       | 7.6   |                         | Sulphonylurea; Metformin                                                                                                                                                |                                                        |
| Ovalle 2004                |                |      |      |     |                   | 30/70 Mixed Insulin | Titrated           | 56    | 14.1      |       |       |         |       |           | 7.6   |                         |                                                                                                                                                                         |                                                        |
| Owens 2011                 | NCT00602472    | 1058 | 2011 | 5.5 | Multinational     | Linagliptin         | 5 mg daily         | 58.3  | 9.9       | 46.8  | 8.15  | 0.8     | 28.4  | 4.8       |       |                         | Metformin + sulfonylurea                                                                                                                                                |                                                        |
| Owens 2011                 |                |      |      |     |                   | Placebo             |                    | 57.6  | 9.7       | 48.3  | 8.14  | 0.8     | 28.2  | 4.5       |       |                         |                                                                                                                                                                         |                                                        |
| Oyama 2008                 | Not provided   | 84   | 2008 | 12  | Japan             | Acarbose            | 300 mg daily       | 65    | 6         | 29.3  | 7.5   | 0.8     | 23.4  | 2.5       | 11.7  |                         | Glibenclamide                                                                                                                                                           |                                                        |
| Oyama 2008                 |                |      |      |     |                   | Control             |                    | 68    | 4         | 43.9  | 7.4   | 0.7     | 23.1  | 3.2       | 11.3  |                         |                                                                                                                                                                         |                                                        |
| Pagano 1995                | Not applicable | 96   | 1995 | 6   | Italy             | Glibenclamide       | 5 mg daily         | 59    | 7.5       | 51.1  | 7.8   | 0.7     | 26.7  | 2.7       | 7     |                         | Metformin                                                                                                                                                               |                                                        |
| Pagano 1995                |                |      |      |     |                   | Miglitol            | 300 mg daily       | 57    | 8.4       | 67.3  | 8.2   | 1.4     | 26.4  | 2.8       | 5     |                         |                                                                                                                                                                         |                                                        |
| Pan 2008                   | NCT00110240    | 661  | 2008 | 5.5 | Multinational     | Vildagliptin        | 100 mg daily       | 51.8  | 10.1      | 60.1  | 8.6   | 0.9     | 26.4  | 3.6       | 1.2   |                         | None                                                                                                                                                                    |                                                        |
| Pan 2008                   |                |      |      |     |                   | Acarbose            | 300 mg daily       | 51.9  | 10.3      | 63.2  | 8.6   | 1       | 25.8  | 3.5       | 1.8   |                         |                                                                                                                                                                         |                                                        |
| Pan 2012                   | Not provided   | 438  | 2012 | 5.5 | China             | Vildagliptin        | 50 mg daily        | 54.2  | 10.2      | 50    | 8.09  | 0.85    | 26.01 | 3.66      | 4.92  |                         | Metformin                                                                                                                                                               |                                                        |
| Pan 2012                   |                |      |      |     |                   | Placebo             |                    | 53.7  | 10        | 44.6  | 8.05  | 0.84    | 25.03 | 3.09      | 5.02  |                         |                                                                                                                                                                         |                                                        |
| Pan 2012                   |                |      |      |     |                   | Placebo             |                    | 54.5  | 9.68      | 45.8  | 8.01  | 0.82    | 25.46 | 3.09      | 5.15  |                         |                                                                                                                                                                         |                                                        |
| Pan 2012a                  | NCT00688932    | 568  | 2012 | 5.5 | Multinational     | Saxagliptin         | 5 mg daily         | 51.2  | 10        | 56.3  | 8.1   | 0.8     | 25.9  | 3.4       | 0.8   |                         | 103.1                                                                                                                                                                   | None                                                   |
| Pan 2012a                  |                |      |      |     |                   | Placebo             |                    | 51.6  | 10.3      | 54.6  | 8.2   | 0.8     | 25.9  | 3.7       | 1.2   |                         | 102.2                                                                                                                                                                   |                                                        |
| Pan 2015                   | Not provided   | 461  | 2015 | 5.5 | China             | Retagliptin         | 100 mg daily       |       |           |       |       |         |       |           |       |                         |                                                                                                                                                                         | None                                                   |
| Pan 2015                   |                |      |      |     |                   | Retagliptin         | 50 mg daily        |       |           |       |       |         |       |           |       |                         |                                                                                                                                                                         |                                                        |
| Pan 2015                   |                |      |      |     |                   | Placebo             |                    |       |           |       |       |         |       |           |       |                         |                                                                                                                                                                         |                                                        |
| Park 2011                  | Not provided   | 68   | 2011 | 5.5 | Korea             | Metformin           | 1000 mg daily      | 63.1  | 8.4       | 51.5  | 8.2   | 0.4     | 25.2  | 3         | 4.9   |                         | Sulfonylurea                                                                                                                                                            |                                                        |
| Park 2011                  |                |      |      |     |                   | Pioglitazone        | 15 mg daily        | 62.3  | 8         | 52.9  | 8.3   | 0.3     | 25.5  | 3.8       | 5.1   |                         |                                                                                                                                                                         |                                                        |
| Park 2014                  | NCT00708578    | 67   | 2014 | 5.5 | Republic of Korea | Metformin           | 1500 mg daily      | 55.8  | 10.5      | 60.61 | 8.4   | 0.9     | 25.1  | 3.6       | 11.3  |                         | Oral antidiabetic drugs                                                                                                                                                 |                                                        |
| Park 2014                  |                |      |      |     |                   | Glimepiride         | 4 mg daily         | 57.3  | 9.2       | 58.82 | 8.4   | 1       | 25.6  | 2.7       | 13    |                         |                                                                                                                                                                         |                                                        |
| Park 2017                  | NCT02946541    | 180  | 2017 | 5.5 | Republic of Korea | Evogliptin          | 5 mg daily         | 57.6  | 11        | 48.8  | 7.21  | 0.56    | 25.6  | 3.2       | 4.74  |                         | 88.6                                                                                                                                                                    | None                                                   |
| Park 2017                  |                |      |      |     |                   | Placebo             |                    | 56.8  | 9.8       | 57.5  | 7.2   | 0.61    | 25.4  | 2.4       | 4.4   |                         | 88.6                                                                                                                                                                    |                                                        |
| Parmar Vinendra            | Not provided   | 130  | 2019 | 5.5 | India             | Teneptin            | 20 mg daily        | 50.7  | 12.1      | 50.0  | 10.8  | 2.1     | 25.8  | 4.0       | 4.0   |                         |                                                                                                                                                                         | Metformin + glimepiride                                |
| Parmar Vinendra            |                |      |      |     |                   | Control             |                    | 49.8  | 14.3      | 56.7  | 9.9   | 1.7     | 25.4  | 4.0       | 3.5   |                         |                                                                                                                                                                         |                                                        |
| Parthan 2018               | NCT02097342    | 30   | 2018 | 6   | India             | Linagliptin         | 5 mg daily         | 49.5  | 41.5-55.5 | 50    | 6.8   | 6.4-7.1 | 25.5  | 23.6-31.1 | 2.5   |                         |                                                                                                                                                                         | Metformin                                              |
| Parthan 2018               |                |      |      |     |                   | Voglibose           | 0.6 mg daily       | 54    | 45.54     | 77.8  | 7     | 7       | 24.8  | 26.6      | 2.5   |                         |                                                                                                                                                                         |                                                        |
| Parthan 2018               |                |      |      |     |                   | Control             |                    | 54    | 48.5-59.5 | 71    | 7     | 6.8-7.1 | 26.4  | 23.8-30.5 | 2     |                         |                                                                                                                                                                         |                                                        |
| Patel 2013                 | Not provided   | 219  | 2013 | 60  | USA               | Acarbose            |                    | 53.7  | 11        | 33    | 6.35  | 0.65    | 35.1  | 7.2       |       |                         | None                                                                                                                                                                    |                                                        |
| Patel 2013                 |                |      |      |     |                   | Placebo             |                    | 53.7  | 11.7      | 34.6  | 6.33  | 0.63    | 35.2  | 7.1       |       |                         |                                                                                                                                                                         |                                                        |
| Pavithra 2019              | Not provided   | 80   | 2019 | 6.0 | India             | Sitagliptin         | 50 mg daily        | 47.6  | 4.7       | 65.0  | 8.6   | 5.2     | 25.3  | 8.2       | 7.1   |                         | Metformin                                                                                                                                                               |                                                        |
| Pavithra 2019              |                |      |      |     |                   | Liraglutide         | 1.8 mg daily       | 43.2  | 6.2       | 49.0  | 8.3   | 3.5     | 28.2  | 5.9       | 6.4   |                         |                                                                                                                                                                         |                                                        |
| Pavo 2003                  | Not applicable | 206  | 2003 | 7.5 | Multinational     | Metformin           | 2550 mg daily      | 55.8  | 8.4       | 56    | 8.6   | 31.1    | 4.4   | 0.47      |       |                         | None                                                                                                                                                                    |                                                        |
| Pavo 2003                  |                |      |      |     |                   | Pioglitazone        | 45 mg daily        | 54.2  | 9.1       | 43.8  | 8.6   | 31.3    | 4.2   | 0.53      |       |                         |                                                                                                                                                                         |                                                        |
| Perez 2009                 | NCT00727857    | 399  | 2009 | 5.5 | Multinational     | Metformin           | 1500 mg daily      | 53.7  | 12        | 46.7  | 8.65  | 1       | 30.8  | 5.7       |       |                         | None                                                                                                                                                                    |                                                        |
| Perez 2009                 |                |      |      |     |                   | Pioglitazone        | 30 mg daily        | 54    | 12        | 49.7  | 8.69  | 1       | 31.2  | 5.5       |       |                         |                                                                                                                                                                         |                                                        |
| PERISCOPE                  | NCT00252777    | 547  | 2008 | 18  | Multinational     | Glimepiride         | 1-4 mg daily       | 59.7  | 9.1       | 65.9  | 7.4   | 1       | 32    | 5.2       |       | 100                     | 1-2 oral drugs excluding thiazolidinedione                                                                                                                              |                                                        |
| PERISCOPE                  |                |      |      |     |                   | Pioglitazone        | 15-45 mg daily     | 60    | 9.4       | 68.9  | 7.4   | 1       | 32.1  | 5.3       |       | 100                     |                                                                                                                                                                         |                                                        |
| Pieriello 2006             | Not provided   | 283  | 2006 | 12  | Italy             | Gliclazide          | 320 mg daily       | 59    | 7         | 64.2  | 8.7   | 0.9     | 28.8  | 2.8       | 8.5   |                         | None                                                                                                                                                                    |                                                        |
| Pieriello 2006             |                |      |      |     |                   | Pioglitazone        | 45 mg daily        | 58    | 6         | 66.4  | 8.8   | 0.9     | 29.2  | 3.1       | 9.8   |                         |                                                                                                                                                                         |                                                        |
| Petrica 2009               | Not provided   | 44   | 2009 | 6   | Romania           | Glimepiride         | 4 mg daily         | 63.2  | 7.19      | 41.2  | 7.58  | 1.01    | 33.58 | 4.93      | 10.4  |                         | Metformin                                                                                                                                                               |                                                        |
| Petrica 2009               |                |      |      |     |                   | Rosiglitazone       | 4 mg daily         | 63    | 8.07      | 41.2  | 7.72  | 1.2     | 33.55 | 4.84      | 10.53 |                         |                                                                                                                                                                         |                                                        |
| Petrica 2011               | Not provided   | 78   | 2011 | 12  | Romania           | Glimepiride         | 4 mg daily         | 58.82 | 7.78      | 7.49  | 1.03  | 32.1    | 5.95  | 10.17     |       | Oral antidiabetic drugs |                                                                                                                                                                         |                                                        |
| Petrica 2011               |                |      |      |     |                   | Pioglitazone        | 30 mg daily        | 56.88 | 6.44      | 6.7   | 0.81  | 33.71   | 6.37  | 10        |       |                         |                                                                                                                                                                         |                                                        |
| Phillis-Tsimikas 2013      | NCT01046110    | 458  | 2013 | 6   | Multinational     | Sitagliptin         | 100 mg daily       | 54.9  | 11.4      | 54.5  | 9     |         | 30.8  | 5.2       | 7.7   |                         | 1-2 oral drugs including metformin, sulfonylureas, glinide or pioglitazone                                                                                              |                                                        |
| Phillis-Tsimikas 2013      |                |      |      |     |                   | Insulin degludev    | Titrated           | 56.4  | 10.2      | 62.7  | 8.8   | 1       | 30    | 5.1       | 7.8   |                         |                                                                                                                                                                         |                                                        |
| Phillips 2001              | Not applicable | 908  | 2001 | 5.5 | USA               | Rosiglitazone       | 8 mg daily         | 56.5  | 9.7       | 65.2  | 9     | 1.5     | 29.9  | 4.3       | 6.9   |                         | None                                                                                                                                                                    |                                                        |
| Phillips 2001              |                |      |      |     |                   | Rosiglitazone       | 8 mg daily         | 58.9  | 9.9       | 65.7  | 8.9   | 1.5     | 30    | 4.3       | 5.9   |                         |                                                                                                                                                                         |                                                        |
| Phillips 2001              |                |      |      |     |                   | Rosiglitazone       | 4 mg daily         | 56.8  | 9.4       | 59.1  | 8.9   | 1.5     | 30    | 4.2       | 5.5   |                         |                                                                                                                                                                         |                                                        |
| Phillips 2001              |                |      |      |     |                   | Rosiglitazone       | 4 mg daily         | 57.5  | 9.9       | 58.6  | 8.9   | 1.6     | 29.9  | 4.1       | 5.4   |                         |                                                                                                                                                                         |                                                        |
| Phillips 2001              |                |      |      |     |                   | Placebo             |                    | 57.7  | 9.2       | 68.8  | 8.9   | 1.5     | 29.1  | 4.2       | 6.6   |                         |                                                                                                                                                                         |                                                        |
| Phillips 2003              | Not applicable | 83   | 2003 | 5.5 | Multinational     | Acarbose            | 300 mg daily       | 58.37 | 10.7      | 65    | 8.05  | 0.89    | 30.75 | 2.96      | 5.32  |                         | Metformin                                                                                                                                                               |                                                        |
| Phillips 2003              |                |      |      |     |                   | Placebo             |                    | 62.39 | 8.02      | 77    | 7.83  | 0.83    | 30.09 | 2.85      | 6.06  |                         |                                                                                                                                                                         |                                                        |
| Phrommintikul 2019         | NCT03178591    | 49   | 2019 | 6   | Thailand          | Vildagliptin        | 100 mg daily       | 63.88 | 7.65      | 50    | 8.25  | 1.13    | 24.9  | 3.16      |       | 75                      | 70.45                                                                                                                                                                   | Metformin and/or sulfonylurea and/or thiazolidinedione |
| Phrommintikul 2019         |                |      |      |     |                   | Daagliptin          | 10 mg daily        | 62.6  | 8.27      | 56    | 8.17  | 1.14    | 25.6  | 3         | 60    | 74.32                   |                                                                                                                                                                         |                                                        |
| PIOCOMB                    | Not provided   | 82   | 2011 | 6   | Germany           | Metformin           | 1700 mg daily      | 64.2  | 7.3       | 54.8  | 7.35  | 0.53    | 31.8  | 5         | 12.3  |                         | 114.2                                                                                                                                                                   | 11.4                                                   |
| PIOCOMB                    |                |      |      |     |                   | Pioglitazone        | 30 mg daily        | 61.5  | 7.1       | 62.5  | 7.33  | 0.53    | 31.7  | 4.3       | 5.8   |                         | 115.8                                                                                                                                                                   | 34.7                                                   |
| PioRx                      | NCT0070653     | 305  | 2011 | 5.5 | Germany           | Glimepiride         | 4 mg daily         | 59    | 10        | 64.1  | 7.4   | 0.7     | 32.5  | 5.3       | 5.9   |                         |                                                                                                                                                                         | Metformin                                              |
| PioRx                      |                |      |      |     |                   | Pioglitazone        | 30 mg daily        | 59    | 10        | 65.8  | 7.1   | 0.6     | 32.6  | 4.9       | 6.2   |                         |                                                                                                                                                                         |                                                        |
| Pioglitazone 001           | Not applicable | 399  | 2000 | 6   | USA               | Pioglitazone        | 45 mg daily        |       |           |       |       |         |       |           |       |                         |                                                                                                                                                                         | None                                                   |
| Pioglitazone 001           |                |      |      |     |                   | Pioglitazone        | 30 mg daily        |       |           |       |       |         |       |           |       |                         |                                                                                                                                                                         |                                                        |
| Pioglitazone 001           |                |      |      |     |                   | Pioglitazone        | 15 mg daily        |       |           |       |       |         |       |           |       |                         |                                                                                                                                                                         |                                                        |
| Pioglitazone 001           |                |      |      |     |                   | Placebo             |                    |       |           |       |       |         |       |           |       |                         |                                                                                                                                                                         |                                                        |
| PIONEER                    | Not applicable | 173  | 2005 | 6   | Germany           | Glimepiride         | 1-6 mg daily       | 63    | 7.4       | 62    | 7.44  | 0.89    | 31.8  | 4.3       | 6.9   |                         |                                                                                                                                                                         | Excluding thiazolidinedione treatment                  |
| PIONEER                    |                |      |      |     |                   | Pioglitazone        | 45 mg daily        | 62.3  | 8.4       |       |       |         |       |           |       |                         |                                                                                                                                                                         |                                                        |

|                |                |      |      |      |                 |                                                     |                    |       |       |      |      |         |       |           |            |      |                                         |                                                                    |                                                                            |
|----------------|----------------|------|------|------|-----------------|-----------------------------------------------------|--------------------|-------|-------|------|------|---------|-------|-----------|------------|------|-----------------------------------------|--------------------------------------------------------------------|----------------------------------------------------------------------------|
| PioRAGE        | UMIN00002055   | 63   | 2014 | 6    | Japan           | Glimepiride                                         | 0.5-2 mg daily     | 65.2  | 9.3   | 66.7 | 8    | 0.8     | 24.4  | 18.1      | 6          | 16.7 | Sulfonylurea or glinide or no treatment |                                                                    |                                                                            |
| PioRAGE        |                |      |      |      |                 | Placebo                                             | 15-30 mg daily     | 64.6  | 10.4  | 74.1 | 7.9  | 0.7     | 25.8  | 5.7       | 8          | 11.1 |                                         |                                                                    |                                                                            |
| PIRAMID 2009   | ISRCTN53177482 | 78   | 2009 | 5.5  | Netherlands     | Metformin                                           | 500-1000 mg daily  | 56.4  | 5.6   | 100  | 7    | 0.6     | 29.2  | 3.7       | 3          |      | Glimepiride                             |                                                                    |                                                                            |
| PIRAMID 2009   |                |      |      |      |                 | Placebo                                             | 15-30 mg daily     | 56.8  | 6.2   | 100  | 7.1  | 1.2     | 28.2  | 3.1       | 4 (median) |      |                                         |                                                                    |                                                                            |
| Piotrosch 2012 | NCT00324675    | 28   | 2012 | 12   | Germany         | Rosiglitazone                                       | 8 mg daily         | 65.4  | 9.6   | 85.7 | 7    | 3       | 33.5  | 4.8       | 15         | 41.8 | 130                                     | Insulin ± sulfonylurea ± glinide ± α-glucosidase inhibitor therapy |                                                                            |
| Piotrosch 2012 |                |      |      |      |                 | Placebo                                             | 8 mg daily         | 66.5  | 8.5   | 85.7 | 7.3  | 3       | 30.1  | 5.4       | 14.7       | 180  |                                         |                                                                    |                                                                            |
| Piotrosch 2013 | NCT00857870    | 75   | 2013 | 8.4  | Germany         | Metformin                                           | 3000 mg daily      | 62.03 | 9.4   | 59   | 8.9  | 0.4     | 29.9  | 5.3       | 2.6        |      | None                                    |                                                                    |                                                                            |
| Piotrosch 2013 |                |      |      |      |                 | Insulin glargine                                    | Titrated           | 60    | 9.3   | 66.6 | 7.2  | 0.7     | 29.2  | 4.6       | 2.8        |      | None                                    |                                                                    |                                                                            |
| Pi-Sunyer 2007 | NCT00120536    | 34   | 2007 | 5.5  | Multinational   | Vildagliptin                                        | 100 mg daily       | 52    | 11.7  | 53.8 | 8.3  | 0.8     | 31.9  | 5         | 2.1        |      | None                                    |                                                                    |                                                                            |
| Pi-Sunyer 2007 |                |      |      |      |                 | Vildagliptin                                        | 100 mg daily       | 50.2  | 12.7  | 56.6 | 8.4  | 0.9     | 32.2  | 6         | 2.4        |      |                                         |                                                                    |                                                                            |
| Pi-Sunyer 2007 |                |      |      |      |                 | Vildagliptin                                        | 50 mg daily        | 50.6  | 10.4  | 55.7 | 8.4  | 0.9     | 31.9  | 5.4       | 1.8        |      |                                         |                                                                    |                                                                            |
| Pi-Sunyer 2007 |                |      |      |      |                 | Placebo                                             | 50 mg daily        | 52    | 12    | 54.3 | 8.5  | 0.8     | 32.7  | 6.4       | 2.5        |      |                                         |                                                                    |                                                                            |
| Pop-Busui 2009 | NCT00549874    | 27   | 2009 | 6    | USA             | Glyburide                                           | 10 mg daily        |       |       |      | 7.5  | 1.9     |       |           | 23         |      | Sulfonylurea                            |                                                                    |                                                                            |
| Pop-Busui 2009 |                |      |      |      |                 | Rosiglitazone                                       | 8 mg daily         |       |       |      | 6.5  | 1       |       |           | 18         |      |                                         |                                                                    |                                                                            |
| POPPS          | Not provided   | 97   | 2009 | 6    | Japan           | Pioglitazone                                        | 15 mg daily        | 64    | 8.8   | 83   | 7.5  | 1.8     |       |           | 100        |      | Excluding pioglitazone                  |                                                                    |                                                                            |
| POPPS          |                |      |      |      |                 | Control                                             | 15 mg daily        | 62.4  | 9.8   | 86   | 7    | 1.5     |       |           | 100        |      |                                         |                                                                    |                                                                            |
| Prattley 2014  | NCT01023581    | 559  | 2014 | 6    | Multinational   | Metformin                                           | 2000 mg daily      | 52.6  | 11.3  | 56.6 | 8.39 |         | 30.51 | 5.043     | 4.08       |      | None                                    |                                                                    |                                                                            |
| Prattley 2014  |                |      |      |      |                 | Metformin                                           | 1000 mg daily      | 54.6  | 10.2  | 53.6 | 8.5  |         | 30.19 | 4.84      | 3.78       |      |                                         |                                                                    |                                                                            |
| Prattley 2014  |                |      |      |      |                 | Atoglitin                                           | 25 mg daily        | 52.6  | 9.38  | 53.8 | 8.3  |         | 30.81 | 5.22      | 3.65       |      |                                         |                                                                    |                                                                            |
| Prattley 2014  |                |      |      |      |                 | Atoglitin                                           | 12.5 mg daily      | 53.7  | 9.7   | 71.2 | 8.44 |         | 30.36 | 5.16      | 3.97       |      |                                         |                                                                    |                                                                            |
| Prattley 2014  |                |      |      |      |                 | Placebo                                             | 12.5 mg daily      | 53.1  | 9.6   | 60   | 8.49 |         | 31.15 | 5.27      | 4.25       |      |                                         |                                                                    |                                                                            |
| PRESERVE-beta  | Not applicable | 428  | 2005 | 24   | USA             | Glyburide                                           | 1.25-10 mg daily   | 53.5  | 11.6  | 48   | 8.3  | 1.1     | 33.5  | 5.6       | 2          |      | Metformin                               |                                                                    |                                                                            |
| PRESERVE-beta  |                |      |      |      |                 | Nateglinide                                         | 360 mg daily       | 52.6  | 11.6  | 51   | 8.4  | 1.2     | 33.3  | 6         | 1.5        |      |                                         |                                                                    |                                                                            |
| PREVENT-1      | UMIN000021552  | 278  | 2018 | 18   | Japan           | Sulfonylurea (Gliclazide, glimepiride, tolbutamide) |                    | 58.8  | 8     | 49.5 | 6.91 | 0.6     | 24.7  | 4         | 4.3        |      | 37.8                                    | None, metformin or alpha glucosidase inhibitor                     |                                                                            |
| PREVENT-1      |                |      |      |      |                 | Pioglitazone                                        | 30-45 mg daily     | 58.5  | 9     | 53.9 | 6.98 | 0.5     | 24.4  | 4         | 3.6        |      | 60.7                                    |                                                                    |                                                                            |
| PREVENT-1      |                |      |      |      |                 | Control                                             |                    | 58.9  | 7.5   | 52.8 | 6.93 | 0.5     | 24.2  | 3.8       | 3.6        |      | 28.9                                    |                                                                    |                                                                            |
| PRIDE          | Not provided   | 94   | 2018 | 6    | Japan           | Pioglitazone                                        | 30 mg daily        | 67    | 57-74 | 83.3 | 6.5  | 6.0-7.8 | 24.8  | 22.6-27.6 |            | 87.5 |                                         | Oral hypoglycemic agents                                           |                                                                            |
| PRIDE          |                |      |      |      |                 | Control                                             |                    | 69    | 64-76 | 63.2 | 6.5  | 6.0-7.2 | 24.9  | 22.1-25.9 |            | 82.6 |                                         |                                                                    |                                                                            |
| PRIME-V        | UMIN000015170  | 98   | 2019 | 5.5  | Japan           | Metformin                                           | 1000-1500 mg daily | 55.7  | 12.2  | 56   | 8.12 | 0.9     | 28.83 | 5.32      | 5.3        | 0    |                                         | Sitagliptin                                                        |                                                                            |
| PRIME-V        |                |      |      |      |                 | Canagliflozin                                       | 50 mg daily        | 56.6  | 11.9  | 64.6 | 7.95 | 0.73    | 27.55 | 4.24      | 5.4        | 0    |                                         |                                                                    |                                                                            |
| PRISMA         | NCT00772174    | 213  | 2013 | 5.5  | Italy           | Pioglitazone                                        | 45 mg daily        | 57    | 8.6   | 59.2 | 6.92 | 0.42    | 32.4  | 5.4       | 5.8        |      | 41.3                                    | Metformin                                                          |                                                                            |
| PRISMA         |                |      |      |      |                 | Placebo                                             |                    | 57.8  | 8.2   | 60.2 | 7.02 | 0.46    | 32.6  | 5.3       | 5.7        |      | 50                                      |                                                                    |                                                                            |
| PROactive      | NCT0174993     | 5208 | 2005 | 34.5 | Multinational   | Pioglitazone                                        | 15-45 mg daily     | 61.9  | 7.6   | 67   | 8.1  |         | 30.7  | 4.7       |            | 100  |                                         | Oral agents ± insulin                                              |                                                                            |
| PROactive      |                |      |      |      |                 | Placebo                                             |                    | 61.6  | 7.8   | 66   | 8.1  |         | 31    | 4.8       |            | 100  |                                         |                                                                    |                                                                            |
| PROLOGUE       | UMIN000004490  | 463  | 2016 | 24   | Japan           | Sitagliptin                                         | 100 mg daily       | 69.2  | 9.3   | 65.8 | 6.96 | 0.64    | 25.3  | 4.1       | 20.7       | 66.5 |                                         | Antidiabetic drugs                                                 |                                                                            |
| PROLOGUE       |                |      |      |      |                 | Placebo                                             |                    | 69.5  | 9.2   | 68.6 | 6.96 | 0.55    | 24.9  | 4         | 25         | 66.8 |                                         |                                                                    |                                                                            |
| QUARTER        | Not applicable | 1194 | 2004 | 12   | Europe          | Metformin                                           | 2500 mg daily      | 56    | 9.3   | 57.8 | 8.7  | 1       | 31.4  | 5.2       | 3.1        |      | None                                    |                                                                    |                                                                            |
| QUARTER        |                |      |      |      |                 | Pioglitazone                                        | 45 mg daily        | 57    | 9.4   | 52.6 | 8.2  | 1       | 31.2  | 4.9       | 3.4        |      | None                                    |                                                                    |                                                                            |
| Quartraro 1986 | Not applicable | 30   | 1986 | 12   | Italy           | Gliclazide                                          | 40-240 mg daily    | 56    | 7.4   |      | 12   | 2.3     | 28.6  | 3.1       | 12.1       |      | Insulin                                 |                                                                    |                                                                            |
| Quartraro 1986 |                |      |      |      |                 | Control                                             |                    | 57    | 7.4   |      | 11.8 | 1.5     | 28.9  | 2.7       | 11.8       |      | Metformin                               |                                                                    |                                                                            |
| Raghuveer 2020 | Not provided   | 100  | 2020 | 12   | India           | Teneligptin                                         | 20 mg daily        |       |       |      |      |         |       |           |            |      |                                         |                                                                    |                                                                            |
| Raghuveer 2020 |                |      |      |      |                 | Control                                             |                    |       |       |      |      |         |       |           |            |      |                                         |                                                                    |                                                                            |
| Rahman 2010    | NCT00489229    | 22   | 2010 | 12   | Malaysia        | Rosiglitazone                                       | 4 mg daily         |       |       |      | 7.5  | 1.7     | 26.6  | 1.4       |            |      | None                                    |                                                                    |                                                                            |
| Rahman 2010    |                |      |      |      |                 | Placebo                                             |                    |       |       |      | 8.3  | 2.3     | 27    | 3.2       |            |      |                                         |                                                                    |                                                                            |
| Rahman 2011    | Not provided   | 204  | 2011 | 12   | Pakistan        | Metformin                                           | 2000 mg daily      | 51.9  | 14.1  | 49   | 10.5 | 2.5     | 26.6  | 6.2       |            |      | None                                    |                                                                    |                                                                            |
| Rahman 2011    |                |      |      |      |                 | Glimepiride                                         | 8 mg daily         | 52    | 15.4  | 47   | 10.6 | 2.9     | 26    | 5.2       |            |      | None                                    |                                                                    |                                                                            |
| Raj 2018       | Not provided   | 613  | 2018 | 5.5  | USA             | Sitagliptin                                         | 100 mg daily       |       |       |      | 7.7  |         |       |           |            | 79   |                                         | Metformin ± sulfonylurea                                           |                                                                            |
| Raj 2018       |                |      |      |      |                 | Dapagliflozin                                       | 10 mg daily        |       |       |      | 7.8  |         |       |           |            | 77   |                                         |                                                                    |                                                                            |
| Raskin 2001    | Not applicable | 318  | 2001 | 6    | USA             | Rosiglitazone                                       | 8 mg daily         | 57.7  | 10.2  | 54.4 | 9    | 1.3     | 32.3  | 4.9       | 12.5       |      | Insulin                                 |                                                                    |                                                                            |
| Raskin 2001    |                |      |      |      |                 | Placebo                                             | 4 mg daily         | 57.1  | 10    | 56.6 | 9.1  | 1.3     | 32.1  | 4.8       | 12.7       |      |                                         |                                                                    |                                                                            |
| Raskin 2001    |                |      |      |      |                 | Placebo                                             |                    | 55.6  | 10.3  | 55.8 | 8.9  | 1.1     | 32.7  | 4.5       | 11.7       |      |                                         |                                                                    |                                                                            |
| Raskin 2004    | Not applicable | 125  | 2004 | 5.5  | USA             | Rosiglitazone                                       | 8 mg daily         | 56.6  | 10.8  | 53.2 |      |         |       |           | 9          | 7.4  |                                         | None                                                               |                                                                            |
| Raskin 2004    |                |      |      |      |                 | Repaglinide                                         | 12 mg daily        | 58.5  | 10.1  | 61.9 |      |         |       |           | 9.7        | 7.2  |                                         |                                                                    |                                                                            |
| Raskin 2009    | Not provided   | 657  | 2009 | 6    | USA             | Rosiglitazone                                       | 4 mg daily         | 55.5  | 10.3  | 50.8 | 8.46 | 1.097   | 32.3  | 5.28      | 7.1        |      | Oral agents                             |                                                                    |                                                                            |
| Raskin 2009    |                |      |      |      |                 | Repaglinide                                         | 10 mg daily        | 54.8  | 11.5  | 57.8 | 8.45 | 1.125   | 31.9  | 5.51      | 7.4        |      |                                         |                                                                    |                                                                            |
| Raskin 2009    |                |      |      |      |                 | Repaglinide                                         | 8 mg daily         | 54.5  | 10.5  | 58.8 | 8.29 | 0.973   | 32.5  | 5.47      | 7.3        |      |                                         |                                                                    |                                                                            |
| Raz 2008       | NCT00377610    | 190  | 2008 | 6.9  | Multinational   | Sitagliptin                                         | 100 mg daily       | 53.6  | 9.5   | 51   | 9.3  | 0.9     | 30.1  | 4.4       | 8.4        |      | Metformin ± oral monotherapy            |                                                                    |                                                                            |
| Raz 2008       |                |      |      |      |                 | Placebo                                             |                    | 56.1  | 9.5   | 41.5 | 9.1  | 0.8     | 30.4  | 5.3       | 7.3        |      |                                         |                                                                    |                                                                            |
| RECORD         | NCT00379769    | 4467 | 2009 | 66   | Multinational   | Rosiglitazone                                       | 8 mg daily         |       |       |      | 51.5 |         |       |           |            | 17.3 |                                         | Metformin                                                          |                                                                            |
| RECORD         |                |      |      |      |                 | Standard care                                       |                    |       |       |      | 51.7 |         |       |           |            | 17.4 |                                         |                                                                    |                                                                            |
| REFORM         | NCT02397421    | 56   | 2020 | 12   | United Kingdom  | Dapagliflozin                                       | 10 mg daily        | 66.9  | 7.0   | 64.3 |      |         | 33.0  | 5.5       | 100.0      | 68   |                                         | Stable therapy                                                     |                                                                            |
| REFORM         |                |      |      |      |                 | Placebo                                             |                    | 67.4  | 6.8   | 67.9 |      |         | 32.0  | 5.2       | 100.0      | 76   |                                         |                                                                    |                                                                            |
| REGO-F         | UMIN000018321  | 72   | 2020 | 11.0 | Japan           | Glimepiride                                         | 1 mg daily         | 62.4  | 11.3  | 63.0 | 7.4  | 0.6     | 25.1  | 2.7       | 10.3       |      | Antidiabetic agents                     |                                                                    |                                                                            |
| REGO-F         |                |      |      |      |                 | Repaglinide                                         | 0.75 mg daily      | 63.5  | 9.4   | 63.0 | 7.6  | 0.8     | 25.5  | 3.0       | 8.1        |      |                                         |                                                                    |                                                                            |
| RELEASE        | NCT02015299    | 44   | 2017 | 6    | The Netherlands | Linagliptin                                         | 5 mg daily         | 63    | 52-66 | 59   | 6.3  | 0.4     | 32.3  | 27.8-38.2 | 1.5        | 88   |                                         | None                                                               |                                                                            |
| RELEASE        |                |      |      |      |                 | Placebo                                             |                    | 62    | 56-69 | 64   | 6.2  | 0.5     | 29    | 27.4-34.2 | 1          | 81   |                                         |                                                                    |                                                                            |
| RESULT         | Not provided   | 227  | 2006 | 24   | USA, Canada     | Rosiglitazone                                       | 4-8 mg daily       | 68.7  | 6.1   | 74.8 | 7.72 | 1.03    | 30.2  | 4.5       | 6.8        |      | Sulfonylurea                            |                                                                    |                                                                            |
| RESULT         |                |      |      |      |                 | Placebo                                             |                    | 68.2  | 6.3   | 71.8 | 7.65 | 0.99    | 30.5  | 4.9       | 6.8        |      |                                         |                                                                    |                                                                            |
| REWIND         | NCT01394952    | 9901 | 2019 | 64.8 | Multinational   | Dulaglutide                                         | 1.5 mg weekly      | 66.2  | 6.5   | 53.4 | 7.3  | 1.1     | 32.3  | 5.7       | 10.5       | 31.5 | 75.3                                    | 1.8                                                                | Antihyperglycemic therapy except DPP-4 inhibitor or GLP-1 receptor agonist |
| REWIND         |                |      |      |      |                 | Placebo                                             |                    | 66.2  | 6.5   | 53.9 | 7.4  | 1.1     | 32.3  | 5.8       | 10.6       | 31.4 | 74.7                                    | 1.88                                                               |                                                                            |
| Reynolds 2002  | Not applicable | 18   | 2002 | 5.5  | USA             | Rosiglitazone                                       | 4 mg daily         |       |       |      | 8    | 0.8     | 36.4  | 5.1       |            |      | None                                    |                                                                    |                                                                            |
| Reynolds 2002  |                |      |      |      |                 | Placebo                                             |                    |       |       |      | 9.8  | 1.6     | 36.3  | 5.7       |            |      |                                         |                                                                    |                                                                            |
| Reynolds 2007  | Not provided   | 40   | 2007 | 5.5  | USA             | Rosiglitazone                                       | 4 mg daily         |       |       |      | 9.1  | 0.94    |       |           |            |      | Metformin ± sulfonylurea                |                                                                    |                                                                            |
| Reynolds 2007  |                |      |      |      |                 | Insulin glargine                                    | Titrated           |       |       |      | 8.86 | 0.87    |       |           |            |      |                                         |                                                                    |                                                                            |
| Ristic 2006    | Not provided   | 262  | 2006 | 5.5  | Multinational   | Gliclazide                                          | 240 mg daily       | 61.6  | 10.1  | 50.4 | 7.6  | 0.58    | 29.5  | 3.6       | 6.7        |      | Metformin                               |                                                                    |                                                                            |
| Ristic 2006    |                |      |      |      |                 | Nateglinide                                         | 540 mg daily       | 62    | 11    | 54.1 | 7.67 | 0.59    | 28.5  | 3.5       | 7.16       |      |                                         |                                                                    |                                                                            |
| Robbins 2007   | NCT00191464    | 317  | 2007 | 5.5  | Multinational   | Insulin glargine                                    | Titrated           | 57.4  | 9.2   | 50.3 | 7.8  | 0.9     | 29.2  | 6.3       | 11.3       |      | Metformin ± sulfonylurea                |                                                                    |                                                                            |
| Robbins 2007   |                |      |      |      |                 | Insulin protamine/ Titrated                         |                    | 58.1  | 8.9   | 49.4 | 7.8  | 1       | 32    | 6         | 12.5       |      |                                         |                                                                    |                                                                            |
| Roberts 2005   | Not applicable | 168  | 2005 | 7    | USA, Canada     | Glime                                               |                    |       |       |      |      |         |       |           |            |      |                                         |                                                                    |                                                                            |

|                 |                 |       |      |      |               |                |                            |      |       |      |      |         |       |           |      |      |                                                           |                                 |
|-----------------|-----------------|-------|------|------|---------------|----------------|----------------------------|------|-------|------|------|---------|-------|-----------|------|------|-----------------------------------------------------------|---------------------------------|
| SAISI           | UMIN00004955    | 103   | 2016 | 6    | Japan         | Glimepiride    | 0.5-2.0 mg daily           | 60   | 36-60 | 52.7 | 7.4  | 7.5-8.6 | 25.2  | 3.5       |      |      | Metformin                                                 |                                 |
| SAISI           |                 |       |      |      |               | Sitagliptin    | 50-100 mg daily            | 62   | 35-80 | 68.8 | 7.4  | 6.7-8.4 | 25.7  | 3.9       |      |      |                                                           |                                 |
| Saleem 2011     | Not provided    | 100   | 2011 | 12   | Pakistan      | Glibenclamide  | 8.8 mg daily               | 45.8 | 8.8   | 20   | 1.6  | 20.4    | 5.6   |           |      |      | None                                                      |                                 |
| Saleem 2011     |                 |       |      |      |               | Repaglinide    | 4.27 mg daily              | 46.6 | 10.5  | 32   | 9.9  | 1.6     | 27.1  | 3.5       |      |      |                                                           |                                 |
| Salman 2001     | Not applicable  | 57    | 2001 | 5.5  | Turkey        | Glucoside      | 80-160 mg daily            | 56.1 | 8.7   | 53.3 | 8.7  | 0.6     | 29.2  | 2.8       |      |      | None                                                      |                                 |
| Salman 2001     |                 |       |      |      |               | Acarbose       | 200-300 mg daily           | 52.6 | 9.1   | 63   | 8.9  | 0.7     | 30.2  | 3.8       |      |      | 4.7                                                       |                                 |
| Saloranta 2002  | Not applicable  | 675   | 2002 | 5.5  | Multinational | Nateglinide    | 300 mg daily               | 55.6 | 9.9   | 65.5 | 6.57 | 0.68    | 29.12 | 3.67      |      |      | None                                                      |                                 |
| Saloranta 2002  |                 |       |      |      |               | Nateglinide    | 180 mg daily               | 61.1 | 9.3   | 61.1 | 6.53 | 0.6     | 28.92 | 3.7       |      |      | 3.6                                                       |                                 |
| Saloranta 2002  |                 |       |      |      |               | Nateglinide    | 60 mg daily                | 61   | 10.1  | 63.3 | 6.55 | 0.63    | 28.95 | 3.59      |      |      | 3.8                                                       |                                 |
| Saloranta 2002  |                 |       |      |      |               | Placebo        |                            | 59.1 | 10.6  | 60.1 | 6.45 | 0.6     | 28.78 | 3.54      |      |      | 3.2                                                       |                                 |
| Samson 2011     | NCT01432405     | 21    | 2011 | 12   | USA           | Ezetimibe      | 20 µg daily                |      |       |      |      |         |       |           |      |      | Pioglitazone                                              |                                 |
| Samson 2011     |                 |       |      |      |               | Placebo        |                            |      |       |      |      |         |       |           |      |      |                                                           |                                 |
| Sato 2019       | UMIN00004985    | 41    | 2019 | 5.5  | Japan         | Glimepiride    | 6 mg daily                 | 62.1 | 9     | 59   | 7.8  | 0.5     | 24.6  | 3.5       | 11.9 |      | 43.7                                                      |                                 |
| Sato 2019       |                 |       |      |      |               | Sitagliptin    | 50 mg daily                | 63.4 | 5.9   | 68   | 8    | 0.6     | 24    | 2.4       | 12.9 |      | 33.8                                                      |                                 |
| SAVOR - T1M1 S3 | NCT01107886     | 16492 | 2013 | 25.2 | Multinational | Saxagliptin    | 2.5-5 mg daily             | 65.1 | 8.5   | 66.6 | 8    | 1.4     | 31.1  | 5.5       | 78.4 | 72.5 | 1.8                                                       | Excluded incretin-based therapy |
| SAVOR - T1M1 S3 |                 |       |      |      |               | Placebo        |                            | 65   | 8.6   | 67.3 | 8    | 1.4     | 31.2  | 5.7       | 78.7 | 72.7 | 1.9                                                       |                                 |
| Saxagliptin 014 | NCT00212667     | 743   | 2009 | 5.5  | Multinational | Saxagliptin    | 10 mg daily                | 54.2 | 10.1  | 52.5 | 8    | 1       | 31.1  | 4.8       |      |      | Metformin                                                 |                                 |
| Saxagliptin 014 |                 |       |      |      |               | Saxagliptin    | 5 mg daily                 | 54.7 | 9.6   | 53.9 | 8.1  | 0.8     | 31.2  | 4.7       |      |      | 6.4                                                       |                                 |
| Saxagliptin 014 |                 |       |      |      |               | Saxagliptin    | 2.5 mg daily               | 54.7 | 10.1  | 42.2 | 8.1  | 1       | 31.7  | 5.2       |      |      | 6.7                                                       |                                 |
| Saxagliptin 014 |                 |       |      |      |               | Placebo        |                            | 54.8 | 10.2  | 53.6 | 8.1  | 0.9     | 31.6  | 4.8       |      |      | 6.7                                                       |                                 |
| SCALE Diabetes  | NCT01372232     | 855   | 2015 | 13   | Multinational | Liraglutide    | 3 mg daily                 | 55   | 10.8  | 52   | 7.9  | 0.8     | 37.1  | 6.5       | 16.4 |      | 1 to 3 drugs (metformin, thiazolidinedione, sulfonylurea) |                                 |
| SCALE Diabetes  |                 |       |      |      |               | Liraglutide    | 1.8 mg daily               | 54.9 | 10.7  | 51.2 | 8    | 0.8     | 37    | 6.9       |      |      | 7.4                                                       |                                 |
| SCALE Diabetes  |                 |       |      |      |               | Placebo        |                            | 54.7 | 9.8   | 45.8 | 7.9  | 0.8     | 37.4  | 7.1       |      |      | 12.3                                                      |                                 |
| Scherbaum 2002  | Not applicable  | 233   | 2002 | 6    | Germany       | Pioglitazone   | 30 mg daily                | 59.6 |       |      | 9.06 |         | 29.3  |           |      |      | None                                                      |                                 |
| Scherbaum 2002  |                 |       |      |      |               | Pioglitazone   | 15 mg daily                | 58   |       |      | 62.9 |         | 9.33  |           |      |      | 5.4                                                       |                                 |
| Scherbaum 2002  |                 |       |      |      |               | Placebo        |                            | 59.1 |       |      | 56   |         | 8.75  |           |      |      | 5.6                                                       |                                 |
| Scherbaum 2008  | NCT00101712     | 306   | 2008 | 12   | Multinational | Vildagliptin   | 50 mg daily                | 63.3 | 10.2  | 59.6 | 6.7  | 0.4     | 30.4  | 4.9       |      |      | 2.5                                                       |                                 |
| Scherbaum 2008  |                 |       |      |      |               | Placebo        |                            | 62.8 | 11    | 59.3 | 6.8  | 0.4     | 30    | 4.9       |      |      | 2.7                                                       |                                 |
| Schweizer 2007  | NCT0099866      | 780   | 2007 | 12   | Multinational | Metformin      | 2000 mg daily              | 53.6 | 10.2  | 57.5 | 8.7  | 1.1     | 32.5  | 5.7       |      |      | None                                                      |                                 |
| Schweizer 2007  |                 |       |      |      |               | Vildagliptin   | 100 mg daily               | 52.8 | 11.7  | 52.9 | 8.7  | 1.1     | 32.4  | 5.7       |      |      | None                                                      |                                 |
| Schweizer 2009  | NCT00246619     | 335   | 2009 | 5.5  | Multinational | Metformin      | 500-1500 mg daily          | 70.2 | 5.1   | 53   | 7.7  | 0.6     | 29.4  | 4.6       |      |      | 3                                                         |                                 |
| Schweizer 2009  |                 |       |      |      |               | Vildagliptin   | 100 mg daily               | 71.6 | 5.2   | 44.4 | 7.8  | 0.6     | 29.8  | 4.4       |      |      | 2.9                                                       |                                 |
| Segal 1997      | Not applicable  | 119   | 1997 | 5.5  | Multinational | Glibenclamide  | 3.5 mg daily               | 56   |       |      | 62.2 |         | 7.98  |           |      |      | None                                                      |                                 |
| Segal 1997      |                 |       |      |      |               | Miglitol       | 300 mg daily               | 61   |       |      | 55   |         | 7.95  |           |      |      | 5.4                                                       |                                 |
| Segal 1997      |                 |       |      |      |               | Placebo        |                            | 59   |       |      | 57   |         | 8.25  |           |      |      | 29.1                                                      |                                 |
| Segal 2005      | Not applicable  | 139   | 2005 | 18   | Israel        | Acarbose       | 150-900 mg daily           | 53.7 | 8     | 53.6 | 11   | 2.3     | 28.1  | 4.2       |      |      | Mainly sulfonylureas                                      |                                 |
| Segal 2005      |                 |       |      |      |               | Placebo        |                            | 55.7 | 8.1   | 53.2 | 11.4 | 2.9     | 28    | 4.1       |      |      | 11                                                        |                                 |
| Seino 2011      | NCT00395746     | 264   | 2011 | 12   | Japan         | Liraglutide    | 0.9 mg daily               | 66.8 | 13.7  | 67   | 8.61 | 0.78    | 24.4  | 3.8       |      |      | 11.6                                                      |                                 |
| Seino 2011      |                 |       |      |      |               | Liraglutide    | 0.6 mg daily               | 64.5 | 12    | 60.2 | 9    | 0.91    | 25.3  | 3.6       |      |      | 9.3                                                       |                                 |
| Seino 2011      |                 |       |      |      |               | Placebo        |                            | 59.1 | 10.3  | 64.8 | 8.85 | 0.99    | 24.9  | 4         |      |      | 10.1                                                      |                                 |
| Seino 2014      | JapicCTI-11661  | 158   | 2014 | 5.5  | Japan         | Luseoglitazone | 2.5 mg daily               | 58.9 | 10.1  | 75.9 | 8.1  | 0.9     | 26.0  | 4.9       |      |      | 6.5                                                       |                                 |
| Seino 2014      |                 |       |      |      |               | Placebo        |                            | 59.6 | 9.3   | 70.9 | 8.2  | 0.9     | 25.3  | 2         |      |      | 6.9                                                       |                                 |
| Seino 2015      | JapicCTI-131507 | 221   | 2015 | 5.5  | Japan         | Luseoglitazone | 2.5 mg daily               | 61.2 | 8.4   | 74.7 | 8.07 | 0.85    | 24.78 | 3.63      |      |      | 7.4                                                       |                                 |
| Seino 2015      |                 |       |      |      |               | Placebo        |                            | 59.9 | 10.5  | 67.6 | 8.01 | 0.73    | 24.66 | 3.31      |      |      | 7.9                                                       |                                 |
| Seino 2016      | NCT01572740     | 257   | 2016 | 8.4  | Japan         | Liraglutide    | 0.9 mg daily               | 63.3 | 11    | 54.3 | 8.8  | 0.9     | 26.2  | 4.9       |      |      | 14.32                                                     |                                 |
| Seino 2016      |                 |       |      |      |               | Placebo        |                            | 59.8 | 11.3  | 57.7 | 8.8  | 0.9     | 25.2  | 4         |      |      | 14.69                                                     |                                 |
| Seino 2018      | NCT02254291     | 308   | 2018 | 7    | Japan         | Sitagliptin    | 100 mg daily               | 57.9 | 10.1  | 78.6 | 8.2  | 0.9     | 25.1  | 3.6       |      |      | 8.1                                                       |                                 |
| Seino 2018      |                 |       |      |      |               | Semaglutide    | 1.0 mg weekly              | 58.1 | 11.6  | 73.5 | 8    | 0.9     | 26.1  | 5.2       |      |      | 7.8                                                       |                                 |
| Seino 2018      |                 |       |      |      |               | Semaglutide    | 0.5 mg weekly              | 58.8 | 10.4  | 76.7 | 8.2  | 1       | 25.1  | 3.8       |      |      | 8                                                         |                                 |
| Shaddinger 2019 | NCT02683746     | 308   | 2019 | 6    | USA           | Albiglutide    | 50 mg weekly               | 57.6 | 9.3   | 54.2 | 8.14 | 0.88    | 31.9  | 5         |      |      | 9.2                                                       |                                 |
| Shaddinger 2019 |                 |       |      |      |               | Placebo        |                            | 56.6 | 10.1  | 48.7 | 7.99 | 0.81    | 25.1  | 4.6       |      |      | 9.4                                                       |                                 |
| Shah 2011       | Not provided    | 200   | 2011 | 12   | Pakistan      | Glibenclamide  | 5-15 mg daily              | 45.2 | 8.2   | 31   |      |         | 30.2  | 5.5       |      |      | None                                                      |                                 |
| Shah 2011       |                 |       |      |      |               | Repaglinide    | 0.5-2 mg three times daily | 46   | 10.1  | 20   |      |         | 27.2  | 3.2       |      |      | 3                                                         |                                 |
| Shankar 2017    | NCT01590797     | 467   | 2017 | 5.5  | China         | Sitagliptin    | 100 mg daily               | 58.6 | 8.4   | 55.6 | 8.7  | 0.9     | 25.9  | 3         |      |      | 11                                                        |                                 |
| Shankar 2017    |                 |       |      |      |               | Placebo        |                            | 56.7 | 9.1   | 49.8 | 8.8  | 0.9     | 26.1  | 2.9       |      |      | 11.3                                                      |                                 |
| Shankar 2017a   | NCT01355156     | 402   | 2017 | 5.5  | Multinational | Omarigliptin   | 25 mg daily                | 57.5 | 8.1   | 50.2 | 8.1  | 0.9     | 32.4  | 5.8       |      |      | 8.2                                                       |                                 |
| Shankar 2017a   |                 |       |      |      |               | Placebo        |                            | 56.8 | 9.1   | 50.7 | 8    | 0.9     | 32.6  | 6.1       |      |      | 7.4                                                       |                                 |
| Shestakova 2018 | NCT02794792     | 165   | 2018 | 5.5  | Russia        | Ipragliflozin  | 50 mg daily                | 58.9 | 9.3   | 43.6 | 8.39 | 0.93    | 32.8  | 4.76      |      |      | 6.65                                                      |                                 |
| Shestakova 2018 |                 |       |      |      |               | Placebo        |                            | 58   | 9.5   | 48   | 8.46 | 0.96    | 31.95 | 4.18      |      |      | 6.6                                                       |                                 |
| Shibuya 2018    | UMIN000016090   | 32    | 2018 | 6    | Japan         | Metformin      | 1500 mg daily              | 60   | 53-66 | 50   | 7.4  | 6.97-7  | 27.2  | 24.9-32.0 |      |      | 0.75                                                      |                                 |
| Shibuya 2018    |                 |       |      |      |               | Luseoglitazone | 2.5 mg daily               | 51   | 47-62 | 62.5 | 7.8  | 7.2-7.9 | 27.9  | 26.2-28.7 |      |      | 0.4                                                       |                                 |
| SIMPLE          | NCT01966978     | 120   | 2019 | 6    | USA           | Liraglutide    | 1.8 mg daily               | 46.7 | 9     | 32.2 | 12.1 | 1.4     | 36.1  | 9.5       |      |      | 10                                                        |                                 |
| SIMPLE          |                 |       |      |      |               | Insulin aspart |                            | 48.1 | 10    | 26.2 | 12   | 1.5     | 38.3  | 11        |      |      | 10                                                        |                                 |
| Sit2Mix         | Not provided    | 389   | 2015 | 5.5  | Multinational | Sitagliptin    | 100 mg daily               | 56.3 | 10.2  | 48.2 | 8.4  | 0.8     | 29.4  | 4.5       |      |      | Metformin ± oral antidiabetic drugs                       |                                 |
| Sit2Mix         |                 |       |      |      |               | Standard care  |                            | 54.8 | 9.5   | 57.2 | 8.4  | 0.8     | 29.3  | 4.3       |      |      |                                                           |                                 |
| Sitagliptin 019 | NCT0086502      | 353   | 2006 | 5.5  | Multinational | Sitagliptin    | 100 mg daily               | 55.6 | 10.4  | 53.1 | 8.1  | 0.8     | 32    | 5.2       |      |      | 6.1                                                       |                                 |
| Sitagliptin 019 |                 |       |      |      |               | Placebo        |                            | 56.9 | 11.1  | 57.9 | 8    | 0.8     | 31    | 5         |      |      | 6.1                                                       |                                 |
| Sitagliptin 020 | NCT0086515      | 701   | 2006 | 5.5  | Multinational | Sitagliptin    | 100 mg daily               | 54.4 | 10.4  | 55.8 | 8    | 0.8     | 30.9  | 5.3       |      |      | 6                                                         |                                 |
| Sitagliptin 020 |                 |       |      |      |               | Placebo        |                            | 54.7 | 9.7   | 59.5 | 8    | 0.8     | 31.5  | 4.9       |      |      | 6.6                                                       |                                 |
| Sitagliptin 021 | NCT0087516      | 726   | 2006 | 5.5  | Multinational | Sitagliptin    | 200 mg daily               |      |       |      |      |         |       |           |      |      |                                                           | None                            |
| Sitagliptin 021 |                 |       |      |      |               | Placebo        |                            |      |       |      |      |         |       |           |      |      |                                                           |                                 |
| Sitagliptin 024 | NCT0094770      | 1172  | 2007 | 12   | Multinational | Glipizide      | 5-20 mg daily              | 56.5 | 9.8   | 61.3 | 7.6  | 0.9     | 31.3  | 5.2       |      |      | 6.2                                                       |                                 |
| Sitagliptin 024 |                 |       |      |      |               | Sitagliptin    | 100 mg daily               | 56.8 | 9.3   | 57.1 | 7.7  | 0.9     | 31.5  | 5         |      |      | 6.5                                                       |                                 |
| Sitagliptin 035 | Not provided    | 441   | 2007 | 5.5  | Multinational | Sitagliptin    | 100 mg daily               | 55.6 | 9.6   | 52.7 | 8.34 | 0.76    | 31.2  | 6.3       |      |      | 8.3                                                       |                                 |
| Sitagliptin 035 |                 |       |      |      |               | Placebo        |                            | 56.5 | 9.8   | 53.4 | 8.34 | 0.74    | 30.7  | 6.3       |      |      | 9.3                                                       |                                 |
| Sitagliptin 036 | NCT0103857      | 355   | 2007 | 5.5  | Multinational | Sitagliptin    | 100 mg daily               | 53.3 | 10.2  | 52   | 8.9  | 1       | 31.2  | 5.9       |      |      | 4.4                                                       |                                 |
| Sitagliptin 036 |                 |       |      |      |               | Placebo        |                            | 53.6 | 10    | 52.8 | 8.7  | 1       | 32.5  | 6.7       |      |      | 4.6                                                       |                                 |
| Sitagliptin 049 | NCT00449930     | 1050  | 2010 | 6    | Multinational | Metformin      | 2000 mg daily              | 55.7 | 10.3  | 44   | 7.2  | 0.7     | 30.9  | 4.9       |      |      | 2.1                                                       |                                 |
| Sitagliptin 049 |                 |       |      |      |               | Sitagliptin    | 100 mg daily               | 56.3 | 10.7  | 48   | 7.2  | 0.7     | 30.7  | 4.7       |      |      |                                                           |                                 |



|                     |                |       |      |      |               |                   |                                            |       |       |       |      |          |       |             |      |     |       |                                                                      |                                                                                    |
|---------------------|----------------|-------|------|------|---------------|-------------------|--------------------------------------------|-------|-------|-------|------|----------|-------|-------------|------|-----|-------|----------------------------------------------------------------------|------------------------------------------------------------------------------------|
| Sridhar 2013        | NCT01206400    | 50    | 2013 | 6    | India         | Pioglitazone      | 30 mg daily                                | 47.9  | 5.8   | 100   | 6.8  | 0.4      | 25.3  | 2.7         | 2.2  |     |       |                                                                      |                                                                                    |
| Sridhar 2013        |                |       |      |      |               | Placebo           |                                            | 44    | 7.2   | 100   | 6.8  | 0.4      | 25.1  | 3.2         | 2.9  |     |       |                                                                      |                                                                                    |
| St John Sutton 2002 | Not applicable | 303   | 2002 | 12   | USA           | Glipizide         | 30 mg daily                                | 56.1  | 8.9   | 72    | 9.5  | 1.6      |       |             | 6.2  |     |       |                                                                      |                                                                                    |
| St John Sutton 2002 |                |       |      |      |               | Rosiglitazone     | 8 mg daily                                 | 55.1  | 9     | 72.1  | 9.1  | 1.7      |       |             | 5.3  |     |       |                                                                      |                                                                                    |
| Standl 1999         | Not applicable | 48    | 1999 | 5.5  | Germany       | Acarbose          | 50 mg twice daily-200 mg three times daily | 59.3  | 8.5   | 58.3  | 10.9 | 1        | 25.2  | 2.2         | 11.5 |     |       | Sulphonylurea, Insulin                                               |                                                                                    |
| Standl 1999         |                |       |      |      |               | Placebo           |                                            | 62.9  | 9.4   | 43.7  | 11   | 1.2      | 24.1  | 2           | 12.2 |     |       |                                                                      |                                                                                    |
| Standl 2001         | Not applicable | 133   | 2001 | 5.5  | Multinational | Miglior           | 300 mg daily                               | 62    | 8     | 50.8  | 8.8  | 0.85     | 27.7  | 3.7         | 8    |     |       | Metformin + glibenzclamide                                           |                                                                                    |
| Standl 2001         |                |       |      |      |               | Placebo           |                                            | 61    | 8     | 54.4  | 8.84 | 0.66     | 27.9  | 3.5         | 9    |     |       |                                                                      |                                                                                    |
| START               | NCT02273050    | 424   | 2018 | 5.5  | China         | Metformin         | 2000 mg daily                              | 50.1  | 11    | 63.8  | 9.5  | 1        | 26.5  | 3.6         | 0.72 |     |       | None                                                                 |                                                                                    |
| START               |                |       |      |      |               | Saxagliptin       | 5 mg daily                                 | 49.5  | 10.9  | 70.9  | 9.4  | 1        | 26.5  | 3.2         | 0.73 |     |       |                                                                      |                                                                                    |
| START-1             | NCT0183104     | 305   | 2016 | 12   | Japan         | Glimepiride       | 0.25-3 mg daily                            | 70.8  | 5.5   | 61.2  | 7.5  | 0.7      | 24.2  | 3.6         | 3.1  |     |       | None                                                                 |                                                                                    |
| START-1             |                |       |      |      |               | Saxagliptin       | 25-100 mg daily                            | 70.2  | 6.4   | 51.7  | 7.5  | 0.7      | 24.1  | 3.3         | 4.2  |     |       |                                                                      |                                                                                    |
| Stewart 2006        | Not provided   | 526   | 2006 | 7.4  | Europe        | Rosiglitazone     | 4-8 mg daily                               | 58.9  | 8.4   | 55    | 7.2  | 0.6      | 30.9  | 5.4         | 3.7  |     |       | None or monotherapy excluding insulin                                |                                                                                    |
| Stewart 2006        |                |       |      |      |               | Control           |                                            | 59    | 7.9   | 56    | 7.2  | 0.6      | 30.6  | 5.5         | 3.7  |     |       |                                                                      |                                                                                    |
| Stocker 2007        | Not provided   | 92    | 2007 | 5.5  | USA           | Metformin         | 1500 mg daily                              | 65    | 10    | 53.2  | 8.48 | 1.8      | 29.7  | 5.1         |      |     |       | None                                                                 |                                                                                    |
| Stocker 2007        |                |       |      |      |               | Rosiglitazone     | 4 mg daily                                 | 64    | 11    | 71.1  | 8.5  | 1.9      | 29.4  | 4.5         |      |     |       |                                                                      |                                                                                    |
| STOP-08             | UMIN000006161  | 64    | 2020 | 5.5  | Japan         | Glimepiride       | 0.5 mg daily                               | 57.6  | 9.3   | 61.3  | 7.5  | 0.4      | 25.4  | 3.8         | 7.7  |     | 89    | Metformin + DPP-4 inhibitor                                          |                                                                                    |
| STOP-08             |                |       |      |      |               | Tofogliflozin     | 20 mg daily                                | 57.3  | 11.4  | 54.5  | 7.4  | 0.5      | 25.3  | 3.9         | 11.3 |     | 92    |                                                                      |                                                                                    |
| Strojeck 2009       | NCT00469092    | 480   | 2009 | 6    | Multinational | Insulin glargine  | Titrated                                   | 56.1  | 10    | 41.2  | 8.5  | 1.1      | 29.2  | 4.5         | 9.5  |     |       | Metformin + secretagogue (no more than 3 oral drugs)                 |                                                                                    |
| Strojeck 2009       |                |       |      |      |               | Insulin Aspart    | Titrated                                   | 55.9  | 9.7   | 46.8  | 8.5  | 1        | 29    | 4.6         | 9.4  |     |       |                                                                      |                                                                                    |
| Strojeck 2011       | NCT00680745    | 596   | 2011 | 5.5  | Multinational | Dapagliflozin     | 10 mg daily                                | 58.9  | 8.32  | 43.7  | 8.07 | 0.79     | 29.75 | 5.6         | 7.2  |     | 30.5  | Sulfonylurea                                                         |                                                                                    |
| Strojeck 2011       |                |       |      |      |               | Dapagliflozin     | 5 mg daily                                 | 60.2  | 9.73  | 50    | 8.12 | 0.78     | 29.84 | 5.2         | 7.4  |     | 38.7  |                                                                      |                                                                                    |
| Strojeck 2011       |                |       |      |      |               | Dapagliflozin     | 2.5 mg daily                               | 59.9  | 10.14 | 50    | 8.11 | 0.75     | 30    | 5.15        | 7.7  |     | 36.4  |                                                                      |                                                                                    |
| Strojeck 2011       |                |       |      |      |               | Placebo           |                                            | 60.3  | 10.16 | 49    | 8.15 | 0.74     | 29.74 | 4.8         | 7.4  |     | 37.9  |                                                                      |                                                                                    |
| Strøm Halden 2019   | NCT0157414     | 44    | 2019 | 5.5  | Norway        | Empagliflozin     | 10 mg daily                                | 63    | 11.72 | 77.3  | 6.9  | 6.5-8.2  | 29.8  | 24.7-39.3   |      |     |       | 66                                                                   | None                                                                               |
| Strøm Halden 2019   |                |       |      |      |               | Placebo           |                                            | 59    | 21-75 | 77.3  | 6.8  | 6.1-7.2  | 27.5  | 22.4-45.8   |      |     |       | 59                                                                   |                                                                                    |
| Su 2014             | Not provided   | 600   | 2014 | 5.5  | China         | Vildagliptin      | 100 mg daily                               | 47.6  | 14.4  |       | 8.76 | 1.72     |       |             |      |     |       | Metformin + alpha glucosidase inhibitor                              |                                                                                    |
| Su 2014             |                |       |      |      |               | Placebo           |                                            | 48.7  | 11.5  |       | 8.42 | 1.97     |       |             |      |     |       |                                                                      |                                                                                    |
| SUCCESS             | UMIN000004675  | 119   | 2015 | 5.5  | Japan         | Sitagliptin       | 50 mg daily                                | 57.6  | 12.19 | 65.5  | 7.6  | 0.7      | 29.9  | 4.3         | 6.7  |     |       | Metformin or pioglitazone                                            |                                                                                    |
| SUCCESS             |                |       |      |      |               | Alpha glucosidase | 0.2 mg voglibose or 150 mg miglitol daily  | 59.3  | 11.3  | 62.1  | 7.6  | 0.74     | 26.3  | 4.6         | 6.8  |     |       |                                                                      |                                                                                    |
| SUMER               | Not provided   | 400   | 2015 | 5.5  | México        | Glimepiride       | 6 mg daily                                 | 49.5  | 10.5  |       | 9.6  | 0.9      | 24.5  | 4.4         |      |     |       | None                                                                 |                                                                                    |
| SUMER               |                |       |      |      |               | Sitagliptin       | 100 mg daily                               | 48.6  | 11.7  |       | 9.6  | 0.8      | 24.5  | 5           |      |     |       |                                                                      |                                                                                    |
| Sun 2006            | Not provided   | 60    | 2006 | 6    | China         | Glipizide         | 5 mg daily                                 | 59.3  | 8     | 49    | 8.9  | 3        | 26.9  | 1.57        |      |     | 64.05 | None                                                                 |                                                                                    |
| Sun 2006            |                |       |      |      |               | Pioglitazone      | 30 mg daily                                | 58.8  | 8.2   | 43.5  | 8.53 | 0.69     | 26.3  | 3.1         | 13.1 |     | 64.01 |                                                                      |                                                                                    |
| Sun 2016            | CHCTR-TRC-     | 108   | 2016 | 5.5  | China         | Metformin         | 1500 mg daily                              | 52    | 6     | 55.6  | 8.47 | 0.9      | 27.02 | 1.85        |      |     |       | None                                                                 |                                                                                    |
| Sun 2016            |                |       |      |      |               | Acarbose          | 300 mg daily                               | 53    | 8     | 50    | 8.2  | 0.83     | 27.07 | 1.97        |      |     |       |                                                                      |                                                                                    |
| SUPER               | NCT012104804   | 462   | 2018 | 5.5  | China         | Saxagliptin       | 5 mg daily                                 | 59.3  | 7.9   | 47    | 8.52 | 0.89     | 26.1  | 3.3         | 13.4 |     |       | Insulin with or without metformin                                    |                                                                                    |
| SUPER               |                |       |      |      |               | Placebo           |                                            | 58.9  | 8.2   | 43.5  | 8.53 | 0.69     | 26.3  | 3.1         | 13.1 |     |       |                                                                      |                                                                                    |
| SUSTAIN 1           | NCT02054897    | 387   | 2014 | 6    | Multinational | Semaglutide       | 1.0 mg weekly                              | 52.7  | 11.9  | 62    | 8.12 | 0.81     | 33.92 | 8.43        | 3.62 |     | 100.9 | None                                                                 |                                                                                    |
| SUSTAIN 1           |                |       |      |      |               | Semaglutide       | 0.5 mg weekly                              | 54.6  | 11.1  | 47    | 8.09 | 0.89     | 32.46 | 7.62        | 4.81 |     | 95.91 |                                                                      |                                                                                    |
| SUSTAIN 1           |                |       |      |      |               | Placebo           |                                            | 53.9  | 11    | 54    | 7.95 | 0.85     | 32.4  | 6.86        | 4.06 |     | 100.2 |                                                                      |                                                                                    |
| SUSTAIN 2           | NCT01930188    | 1225  | 2017 | 12   | Multinational | Sitagliptin       | 100 mg daily                               | 54.6  | 10.4  | 51    | 8.2  | 0.9      | 32.5  | 8           | 9.8  |     |       | Metformin ± thiazolidinedione                                        |                                                                                    |
| SUSTAIN 2           |                |       |      |      |               | Semaglutide       | 1.0 mg weekly                              | 56    | 9.4   | 50    | 8    | 0.9      | 32.5  | 6.6         | 6.7  |     |       |                                                                      |                                                                                    |
| SUSTAIN 2           |                |       |      |      |               | Semaglutide       | 0.5 mg weekly                              | 54.8  | 10.2  | 51    | 8    | 0.9      | 32.4  | 6.2         | 6.4  |     |       |                                                                      |                                                                                    |
| SUSTAIN 4           | NCT0128932     | 1082  | 2017 | 6    | Multinational | Semaglutide       | 1.0 mg weekly                              | 56.2  | 10.6  | 51    | 8.3  | 0.9      | 33    | 6.5         | 9.3  |     |       | Metformin ± sulfonylurea                                             |                                                                                    |
| SUSTAIN 4           |                |       |      |      |               | Semaglutide       | 0.5 mg weekly                              | 56.7  | 10.4  | 54    | 8.1  | 0.8      | 33.1  | 6.5         | 7.8  |     |       | 97.9                                                                 |                                                                                    |
| SUSTAIN 4           |                |       |      |      |               | Insulin glargine  | Titrated                                   | 56.2  | 10.6  | 54    | 8.1  | 0.9      | 33    | 6.5         | 8.6  |     |       | 99.7                                                                 |                                                                                    |
| SUSTAIN 5           | NCT02305381    | 396   | 2018 | 6    | Multinational | Semaglutide       | 1.0 mg weekly                              | 58.5  | 33-80 | 58.8  | 8.3  | 6.9-10.8 | 32    | 19.5-51.6   | 13.7 |     |       | Insulin alone or in combination with metformin                       |                                                                                    |
| SUSTAIN 5           |                |       |      |      |               | Semaglutide       | 0.5 mg weekly                              | 59.1  | 28-84 | 56.1  | 8.4  | 7.0-10.3 | 32.8  | 21.1-51.4   | 12.9 |     |       |                                                                      |                                                                                    |
| SUSTAIN 5           |                |       |      |      |               | Placebo           |                                            | 58.8  | 19-86 | 53.4  | 8.4  | 6.8-11.1 | 31.8  | 21.0-48.8   | 13.3 |     |       |                                                                      |                                                                                    |
| SUSTAIN 6           | NCT01720446    | 3257  | 2016 | 24   | Multinational | Semaglutide       | 0.5-1.0 mg weekly                          |       |       |       |      |          |       |             |      |     | 60    | No more than two oral hypoglycemic drugs ± basal or premixed insulin |                                                                                    |
| SUSTAIN 6           |                |       |      |      |               | Placebo           |                                            |       |       |       |      |          |       |             |      |     | 61    |                                                                      |                                                                                    |
| SUSTAIN 8           | NCT03136484    | 788   | 2019 | 12.0 | Multinational | Canagliflozin     | 300 mg daily                               | 57.5  | 10.7  | 51.0  | 8.2  | 1.0      |       |             |      |     |       | Metformin                                                            |                                                                                    |
| SUSTAIN 8           |                |       |      |      |               | Semaglutide       | 1.0 mg weekly                              | 55.7  | 11.1  | 56.6  | 8.3  | 1.0      |       |             |      |     |       |                                                                      |                                                                                    |
| SUSTAIN 9           | NCT03086330    | 302   | 2019 | 6    | Multinational | Semaglutide       | 1.0 mg weekly                              | 57.5  | 8.9   | 58.9  | 8    | 0.8      | 31.1  | 6.2         | 9.8  |     | 5.3   | 94.5                                                                 |                                                                                    |
| SUSTAIN 9           |                |       |      |      |               | Placebo           |                                            |       |       |       |      |          |       |             |      |     | 5.3   | 96                                                                   |                                                                                    |
| SUSTAIN CHINA       | NCT03061214    | 868   | 2020 | 7.3  | Multinational | Sitagliptin       | 100 mg daily                               | 53.1  | 10.4  | 63.8  |      |          |       |             |      |     |       | Metformin                                                            |                                                                                    |
| SUSTAIN CHINA       |                |       |      |      |               | Semaglutide       | 0.5 mg weekly                              | 53.0  | 11.4  | 53.1  |      |          |       |             |      |     |       |                                                                      |                                                                                    |
| SUSTAIN CHINA       |                |       |      |      |               | Semaglutide       | 1 mg weekly                                | 53.0  | 10.6  | 55.6  |      |          |       |             |      |     |       |                                                                      |                                                                                    |
| Suzuki 2014         | Not provided   | 40    | 2014 | 6    | Japan         | Sitagliptin       | 50 mg daily                                | 56.1  | 15.3  | 56    | 9.1  | 1.6      | 26.3  | 7.2         | 1.9  |     | 73.7  | 14                                                                   | None                                                                               |
| Suzuki 2014         |                |       |      |      |               | Liraglutide       | 0.9 mg daily                               | 58.6  | 15.9  | 62.5  | 9.8  | 2.2      | 28.2  | 7.2         | 2.4  |     | 73.2  | 19                                                                   |                                                                                    |
| SWIM                | NCT01341717    | 440   | 2017 | 5.5  | India         | Glimepiride       | 3 mg daily                                 | 50.11 | 7.83  | 51.13 | 7.91 | 25.15    | 3.69  | 15.67       |      |     |       | Metformin and insulin                                                |                                                                                    |
| SWIM                |                |       |      |      |               | Sitagliptin       | 100 mg daily                               | 51.1  | 6.58  | 47.03 | 7.96 | 26.02    | 3.32  | 14.96       |      |     |       |                                                                      |                                                                                    |
| Tagaki 2003         | Not applicable | 44    | 2003 | 6    | Japan         | Pioglitazone      | 30 mg daily                                | 64    | 10    | 86.9  | 6.8  | 0.6      | 25.6  | 2.8         |      |     | 100   | Oral hypoglycemic agents or insulin                                  |                                                                                    |
| Tagaki 2003         |                |       |      |      |               | Control           |                                            | 65    | 9     | 66.7  | 6.7  | 1.2      | 24.5  | 2.9         |      |     | 100   |                                                                      |                                                                                    |
| Takase 2007         | Not provided   | 39    | 2007 | 6    | Japan         | Pioglitazone      | 15 mg daily                                | 67.8  | 8.9   | 55    | 7    | 1.3      | 24.7  | 1.3         |      |     |       | None                                                                 |                                                                                    |
| Takase 2007         |                |       |      |      |               | Voglibose         | 0.6 mg daily                               | 68.2  | 7.4   | 63.2  | 6.9  | 1.3      | 24.2  | 2.6         |      |     |       |                                                                      |                                                                                    |
| Takashima 2018      | UMIN000031454  | 40    | 2018 | 12   | Japan         | Canagliflozin     | 100 mg daily                               | 64.7  | 9.8   | 55    | 7.5  | 0.9      | 24.9  | 3.1         |      |     | 20    | 57.1                                                                 | 139                                                                                |
| Takashima 2018      |                |       |      |      |               | Control           |                                            | 65.4  | 10.4  | 60    | 7.3  | 0.7      | 25.5  | 3.2         |      |     | 15    | 55.4                                                                 | 159                                                                                |
| Tao 2018            | CHCTR-IPR-     | 42    | 2018 | 5.5  | China         | Metformin         | 2000 mg daily                              | 28    | 3     | 100   | 7.3  | 0.2      | 26.4  | 24.6-28.2   |      |     |       | None                                                                 |                                                                                    |
| Tao 2018            |                |       |      |      |               | Saxagliptin       | 5 mg daily                                 | 30    | 5     | 100   | 7.4  | 0.3      | 27.2  | 24.94-29.46 |      |     |       |                                                                      |                                                                                    |
| Takinen 2011        | NCT00601250    | 700   | 2011 | 5.5  | Multinational | Liraglutide       | 5 mg daily                                 | 56.5  | 10.1  | 53    | 8.09 | 0.86     | 29.85 | 4.84        |      |     |       | Metformin + maximum one other drug                                   |                                                                                    |
| Takinen 2011        |                |       |      |      |               | Placebo           |                                            | 56.6  | 10.9  | 57    | 8.02 | 0.88     | 30.05 | 5.01        |      |     |       |                                                                      |                                                                                    |
| TECOS               | NCT00790205    | 14671 | 2015 | 36   | Multinational | Sitagliptin       | 50-100 mg daily                            | 65.4  | 7.9   | 70.9  | 7.2  | 0.5      | 30.2  | 5.6         | 11.6 | 100 | 74.9  | 10.3                                                                 | 1-2 oral drugs (metformin, pioglitazone, or sulfonylurea) or insulin (± metformin) |
| TECOS               |                |       |      |      |               | Placebo           |                                            | 65.5  | 8     | 70.5  | 7.2  | 0.5      | 30.2  | 5.7         | 11.6 | 100 | 74.9  | 11.4                                                                 |                                                                                    |
| T-Emerge 1          | NCT00744926    | 373   | 2012 | 6    | Multinational | Taspoglutide      | 20 mg weekly                               | 55    | 10.4  | 36    | 7.7  | 1        | 31.7  | 4.9         | 2.1  |     |       | None                                                                 |                                                                                    |
| T-Emerge 1          |                |       |      |      |               |                   |                                            |       |       |       |      |          |       |             |      |     |       |                                                                      |                                                                                    |

|                                    |                |      |      |      |                   |               |                                    |       |       |           |      |        |       |      |      |                                                                                                                        |                      |
|------------------------------------|----------------|------|------|------|-------------------|---------------|------------------------------------|-------|-------|-----------|------|--------|-------|------|------|------------------------------------------------------------------------------------------------------------------------|----------------------|
| Tofogliflozin 003                  |                |      |      |      |                   | Placebo       |                                    | 56.8  | 9.9   | 66.1      | 8.41 | 0.78   | 26    | 4.11 | 6    |                                                                                                                        |                      |
| Tolman 2009                        | NCT00494312    | 2120 | 2009 | 36   | USA               | Glibenclamide | 5-15 mg daily                      |       |       | 55.5      | 9.5  | 2      | 32.5  | 6    | 6    | Metformin ± sulfonylurea                                                                                               |                      |
| Tolman 2009                        |                |      |      |      |                   | Pioglitazone  | 15-45 mg daily                     | 57.2  | 8.5   | 2         | 33.5 | 6.1    |       |      |      |                                                                                                                        |                      |
| TOPSCORE                           | UMIN00017861   | 75   | 2017 | 8.9  | Japan             | Sitagliptin   | 50 mg daily                        | 70    | 9     | 79        | 7.2  | 1      | 24.8  | 4.1  | 100  | Insulin, biguanide, and/or thiazolidine                                                                                |                      |
| TOPSCORE                           |                |      |      |      |                   | Control       |                                    | 72    | 10    | 83        | 7.3  | 1.2    | 25.1  | 4.1  | 100  |                                                                                                                        |                      |
| TOSCALIT                           | NCT00700856    | 3028 | 2017 | 57.3 | Italy             | Sulfonylurea  | 15-45 mg daily                     | 62.2  | 6.5   | 58        | 7.69 | 0.51   | 30.4  | 4.5  | 8.5  | 10                                                                                                                     | Metformin            |
| TOSCALIT                           |                |      |      |      |                   | Pioglitazone  | 15-45 mg daily                     | 62.4  | 6.4   | 59        | 7.67 | 0.5    | 30.2  | 4.4  | 8.4  | 12                                                                                                                     |                      |
| Tripathy 2013                      | NCT01223196    | 29   | 2013 | 6    | USA               | Pioglitazone  | 15 mg daily                        | 56    | 9.29  | 63.6      | 7    | 0.66   | 33.6  | 6.3  |      | Metformin and/or sulfonylurea                                                                                          |                      |
| Tripathy 2013                      |                |      |      |      |                   | Placebo       |                                    | 57    | 6.6   | 77.8      | 8    | 1.5    | 33.4  | 5.7  |      |                                                                                                                        |                      |
| TROICA                             | NCT01990469    | 218  | 2017 | 5.5  | Republic of Korea | Gempigliptin  | 50 mg daily                        | 61.4  | 9.2   | 37.4      | 8.2  | 0.8    | 25.1  | 3.1  | 13   | Metformin + glimepiride                                                                                                |                      |
| TROICA                             |                |      |      |      |                   | Placebo       |                                    | 60.4  | 8.8   | 42.2      | 8.2  | 0.9    | 23.7  | 2.7  | 12.8 |                                                                                                                        |                      |
| Trait 2010                         | NCT00143520    | 532  | 2010 | 6    | USA               | Pioglitazone  | 45 mg daily                        | 56.6  | 10.1  | 58.2      | 7.98 | 0.83   | 32.9  | 5.7  | 6.4  | Antidiabetes monotherapy or combinations of sulfonylureas, meglitinides, metformin and/or alpha-glucosidase inhibitors |                      |
| Trait 2010                         |                |      |      |      |                   | Rivoglitazone | 3 mg daily                         | 56.4  | 10.8  | 52.3      | 8.23 | 1.02   | 33    | 6.5  | 6.7  |                                                                                                                        |                      |
| Trait 2010                         |                |      |      |      |                   | Rivoglitazone | 2 mg daily                         | 55    | 10.8  | 56.5      | 8.05 | 0.87   | 33.1  | 6.4  | 5.2  |                                                                                                                        |                      |
| Trait 2010                         |                |      |      |      |                   | Rivoglitazone | 1 mg daily                         | 55.4  | 10.9  | 52.9      | 8    | 0.81   | 32.9  | 6    | 6.2  |                                                                                                                        |                      |
| Trait 2010                         |                |      |      |      |                   | Placebo       |                                    | 55.3  | 9.3   | 51.1      | 8.21 | 0.98   | 32.2  | 5.8  | 6.7  |                                                                                                                        |                      |
| Türken Kemal 2007 Not provided     |                | 46   | 2007 | 6    | Turkey            | Metformin     | 1700 mg daily                      | 56.8  | 8.8   | 25        | 6.3  | 1.2    | 34.5  | 7.9  | 1.5  | None                                                                                                                   |                      |
| Türken Kemal 2007                  |                |      |      |      |                   | Rosiglitazone | 8 mg daily                         | 55.92 | 8.26  | 23.1      | 6.2  | 0.7    | 30.8  | 6.9  | 2.75 |                                                                                                                        |                      |
| Türken Kemal 2007                  |                |      |      |      |                   | Control       |                                    | 54.59 | 10.76 | 23.5      | 5.7  | 0.6    | 31.4  | 5.4  | 1.2  |                                                                                                                        |                      |
| UKPOS 44                           | Not applicable | 1946 | 1999 | 36   | UK                | Acarbose      | 50 mg daily to 100 mg thrice daily | 60    | 9     | 76        | 8.7  | 6.8-11 | 29.8  | 5.6  | 7.9  | Insulin, Metformin, Sulfonylurea - monotherapy or combination                                                          |                      |
| UKPOS 44                           |                |      |      |      |                   | Placebo       |                                    | 60    | 9     | 76        | 8.7  | 6.8-11 | 29.6  | 5.7  | 8    |                                                                                                                        |                      |
| Umperiez 2006                      | Not provided   | 203  | 2006 | 6    | USA               | Glimepiride   | 8 mg daily                         | 51.6  | 11.8  | 55.2      | 8.4  | 0.72   | 34.54 | 6.68 | 4.9  | Metformin                                                                                                              |                      |
| Umperiez 2006                      |                |      |      |      |                   | Pioglitazone  | 45 mg daily                        | 55.7  | 9.7   | 52.3      | 8.31 | 0.77   | 33.8  | 6.62 | 5.9  |                                                                                                                        |                      |
| Vahatalo 2007                      | Not provided   | 41   | 2007 | 12   | Finland           | Metformin     | 2500 mg daily                      |       |       |           | 10.1 |        |       |      |      | Insulin                                                                                                                |                      |
| Vahatalo 2007                      |                |      |      |      |                   | Glipizole     | 10 mg daily                        |       |       |           |      |        |       |      |      | 9.4                                                                                                                    |                      |
| Van Eyk 2019                       | NCT02660047    | 47   | 2019 | 5.5  | The Netherlands   | Liraglutide   | 1.8 mg daily                       | 55    | 11    | 36        | 8.1  | 0.9    | 30.4  | 3.8  | 19   | Concomitant treatment with metformin, sulfonylurea derivatives and insulin was optional                                |                      |
| Van Eyk 2019                       |                |      |      |      |                   | Placebo       |                                    | 55    | 9     | 44        | 8.6  | 1.1    | 28.6  | 4    | 17   |                                                                                                                        |                      |
| Van Gaal 2014                      | NCT0976937     | 319  | 2014 | 5.5  | Belgium           | Sitagliptin   | 100 mg daily                       | 43.4  | 4.7   | 45.3      | 8.1  | 1      | 36.8  | 6.3  | 4.4  | Metformin                                                                                                              |                      |
| Van Gaal 2014                      |                |      |      |      |                   | Linagliptin   | 20 mg daily                        | 42.7  | 5.2   | 34.8      | 8.45 | 0.89   | 35.8  | 7.3  | 4.4  |                                                                                                                        |                      |
| Vanderheiden 2016                  | NCT01505673    | 71   | 2016 | 6    | USA               | Liraglutide   | 1.8 mg daily                       | 52.8  | 8.1   | 39        | 9    | 1.2    | 40.7  | 6.7  | 18   | Oral drugs and insulin                                                                                                 |                      |
| Vanderheiden 2016                  |                |      |      |      |                   | Placebo       |                                    | 55.5  | 6.6   | 39        | 8.9  | 1      | 41.6  | 10.4 | 18   |                                                                                                                        |                      |
| Varghese 2009                      | Not provided   | 57   | 2009 | 12   | UK                | Pioglitazone  | 15 mg daily                        | 62.2  | 8.2   | 78        |      |        | 27.9  | 4.1  |      | Metformin or sulfonylurea                                                                                              |                      |
| Varghese 2009                      |                |      |      |      |                   | Placebo       |                                    | 65.6  | 6.1   | 79        |      |        | 28.6  | 4.3  |      |                                                                                                                        |                      |
| Veleba 2015                        | EudraCT number | 69   | 2015 | 5.5  | Czech Republic    | Pioglitazone  | 15 mg daily                        | 62    |       | 60.0-65.0 |      |        |       |      |      | Metformin                                                                                                              |                      |
| Veleba 2015                        |                |      |      |      |                   | Placebo       |                                    | 62    |       | 58.0-65.0 |      |        |       |      |      |                                                                                                                        |                      |
| Veleba 2015                        |                |      |      |      |                   | Pioglitazone  | 15 mg daily                        | 60.5  |       | 55.3-65.5 |      |        |       |      |      |                                                                                                                        |                      |
| Veleba 2015                        |                |      |      |      |                   | Placebo       |                                    | 59.5  |       | 55.8-63.8 |      |        |       |      |      |                                                                                                                        |                      |
| VERTIS Asia                        | NCT02030706    | 506  | 2019 | 6    | Multinational     | Ertugliflozin | 15 mg daily                        | 56.3  | 9.3   | 58        | 8.1  | 0.9    | 25.7  | 3.2  | 7.5  | Metformin                                                                                                              |                      |
| VERTIS Asia                        |                |      |      |      |                   | Ertugliflozin | 5 mg daily                         | 56.1  | 9     | 55.9      | 8.1  | 0.9    | 26    | 2.8  | 7    |                                                                                                                        |                      |
| VERTIS Asia                        |                |      |      |      |                   | Placebo       |                                    | 56.9  | 9     | 52.7      | 8.1  | 1      | 26.1  | 3.4  | 6.4  | 92.6                                                                                                                   |                      |
| VERTIS CV                          | NCT01986881    | 8246 | 2020 | 60   | Multinational     | Ertugliflozin | 5-15 mg daily                      | 64.4  | 8.1   | 70.3      | 8.2  | 1.0    | 31.9  | 5.4  | 12.9 | 100.0                                                                                                                  | 76                   |
| VERTIS CV                          |                |      |      |      |                   | Placebo       |                                    | 60.0  | 69.3  | 82.0      | 8.0  | 0.9    | 32.0  | 5.5  | 13.1 | 100.0                                                                                                                  | 76                   |
| VERTIS FACTORIAL                   | NCT02099110    | 745  | 2017 | 6    | Multinational     | Sitagliptin   | 100 mg daily                       | 54.8  | 10.7  | 62.3      | 8.6  | 1      | 31.5  | 5.8  | 7.3  | 92.8                                                                                                                   |                      |
| VERTIS FACTORIAL                   |                |      |      |      |                   | Ertugliflozin | 15 mg daily                        | 55.3  | 9.5   | 54        | 8.6  | 1      | 31.5  | 5.8  | 7.3  | 91.9                                                                                                                   |                      |
| VERTIS FACTORIAL                   |                |      |      |      |                   | Ertugliflozin | 5 mg daily                         | 55.1  | 10.1  | 50.8      | 8.6  | 1      | 31.8  | 6.2  | 7.1  | 91                                                                                                                     |                      |
| VERTIS-MET                         | NCT02033889    | 621  | 2018 | 6    | Multinational     | Ertugliflozin | 15 mg daily                        | 56.9  | 9.4   | 45.4      | 8.1  | 0.9    | 31.1  | 4.5  | 8.1  | Metformin                                                                                                              |                      |
| VERTIS-MET                         |                |      |      |      |                   | Ertugliflozin | 5 mg daily                         | 56.6  | 8.1   | 46.9      | 8.1  | 0.9    | 30.8  | 4.8  | 7.9  | 88.9                                                                                                                   |                      |
| VERTIS-MET                         |                |      |      |      |                   | Placebo       |                                    | 56.5  | 8.7   | 46.9      | 8.2  | 0.9    | 30.7  | 4.7  | 8    | 91.6                                                                                                                   |                      |
| VERTIS MONO                        | NCT01958671    | 461  | 2017 | 6    | Multinational     | Ertugliflozin | 15 mg daily                        | 56.2  | 10.8  | 59.2      | 8.35 | 1.12   | 32.5  | 5.7  | 5.22 | 88.3                                                                                                                   |                      |
| VERTIS MONO                        |                |      |      |      |                   | Ertugliflozin | 5 mg daily                         | 56.8  | 11.4  | 57.1      | 8.16 | 0.88   | 33.2  | 7.4  | 5.11 | 88.5                                                                                                                   |                      |
| VERTIS MONO                        |                |      |      |      |                   | Placebo       |                                    | 56.1  | 10.9  | 53.6      | 8.13 | 0.93   | 31.3  | 6.8  | 4.63 | 86.2                                                                                                                   |                      |
| VERTIS RENAL                       | NCT01986855    | 467  | 2018 | 12   | Multinational     | Ertugliflozin | 15 mg daily                        | 67.5  | 8.5   | 48.4      | 8.2  | 0.9    | 31.7  | 5.3  | 14.5 | 49.7                                                                                                                   | 46.9                 |
| VERTIS RENAL                       |                |      |      |      |                   | Ertugliflozin | 5 mg daily                         | 66.7  | 8.3   | 53.2      | 8.2  | 1      | 32.6  | 6.8  | 14.9 | 50                                                                                                                     | 46.8                 |
| VERTIS RENAL                       |                |      |      |      |                   | Placebo       |                                    | 67.5  | 8.9   | 46.8      | 8.1  | 0.9    | 33.2  | 6.1  | 13.1 | 49.4                                                                                                                   | 46                   |
| VERTIS SITA2                       | NCT02036515    | 464  | 2018 | 12   | Multinational     | Ertugliflozin | 15 mg daily                        | 53.7  | 8.6   | 53.6      | 8    | 0.8    | 30.9  | 6.1  | 8.2  | 86.9                                                                                                                   |                      |
| VERTIS SITA2                       |                |      |      |      |                   | Ertugliflozin | 5 mg daily                         | 59.2  | 9.3   | 51.9      | 8.1  | 0.9    | 31.2  | 5.5  | 9.9  | 87                                                                                                                     |                      |
| VERTIS SITA2                       |                |      |      |      |                   | Placebo       |                                    | 58.3  | 9.2   | 65.4      | 8    | 0.9    | 30.3  | 6.4  | 9.4  | 89.9                                                                                                                   |                      |
| VERTIS SU                          | NCT01999218    | 1326 | 2018 | 12   | Multinational     | Glimepiride   | 8 mg daily                         | 57.8  | 9.2   | 51.3      | 7.8  | 0.6    | 31.2  | 6.4  | 7.5  | 86.6                                                                                                                   |                      |
| VERTIS SU                          |                |      |      |      |                   | Ertugliflozin | 15 mg daily                        | 58    | 9.9   | 43.3      | 7.8  | 0.6    | 31.3  | 6.2  | 7.5  | 86.7                                                                                                                   |                      |
| VERTIS SU                          |                |      |      |      |                   | Ertugliflozin | 5 mg daily                         | 58.8  | 9.7   | 50.7      | 7.8  | 0.6    | 31.7  | 5.5  | 7.4  | 88.3                                                                                                                   |                      |
| Vianna 2017                        | NCT01679899    | 42   | 2017 | 12   | Brazil            | Gliclazide    | 120 mg daily                       | 61    | 5.3   | 0         | 7.32 | 0.6    | 33.8  | 6.7  |      | Metformin                                                                                                              |                      |
| Vianna 2017                        |                |      |      |      |                   | Vildagliptin  | 100 mg daily                       | 62.8  | 6.4   | 0         | 7.35 | 0.54   | 31.7  | 5.8  |      |                                                                                                                        |                      |
| VICTORY                            | NCT00169832    | 193  | 2010 | 12   | Multinational     | Rosiglitazone | 8 mg daily                         | 64.2  | 7.3   | 92        | 6.9  | 1.3    | 30.2  | 4.2  | 7.8  | 100                                                                                                                    | Oral drugs           |
| VICTORY                            |                |      |      |      |                   | Placebo       |                                    | 65.1  | 6.9   | 92        | 6.9  | 0.8    | 29.5  | 4.6  | 8.4  | 100                                                                                                                    |                      |
| VISION                             | NCT01541956    | 2985 | 2016 | 5.5  | China             | Vildagliptin  | 100 mg daily                       | 56.5  | 10.6  | 54.4      | 7.2  | 0.9    | 25.1  | 3.2  | 4.3  | 100                                                                                                                    | Metformin            |
| VISION                             |                |      |      |      |                   | Standard care |                                    | 56.2  | 10.8  | 49.6      | 7.2  | 0.8    | 25.1  | 3.2  | 4.1  | 100                                                                                                                    |                      |
| VIVDO                              | NCT00894868    | 254  | 2018 | 12   | Multinational     | Vildagliptin  | 100 mg daily                       | 62.9  | 8.5   | 77.3      | 7.8  | 0.95   | 29.6  | 4.6  | 9.5  | 64.1                                                                                                                   | Drug therapy, if any |
| VIVDO                              |                |      |      |      |                   | Placebo       |                                    | 63.4  | 10.2  | 76.2      | 7.8  | 1.1    | 29.9  | 4.7  | 9.1  | 63.5                                                                                                                   |                      |
| Vongthavaravat 2002 Not applicable |                | 348  | 2002 | 6    | Multinational     | Rosiglitazone | 4 mg daily                         | 54.6  |       | 45.7      | 9.1  |        | 27.1  |      | 5    | Sulfonylurea                                                                                                           |                      |
| Vongthavaravat 2002                |                |      |      |      |                   | Control       |                                    | 57.3  |       | 42.4      | 8.9  |        | 27.1  |      | 6    |                                                                                                                        |                      |
| Wajsbjerg 2007                     | Not provided   | 31   | 2007 | 5.5  | USA               | Pioglitazone  | 15-45 mg daily                     | 51    | 8     | 43.8      | 8.1  | 1.6    | 32    | 4    | 7.1  | None                                                                                                                   |                      |
| Wajsbjerg 2007                     |                |      |      |      |                   | Placebo       |                                    | 49    | 11.6  | 46.7      | 7.9  | 1.5    | 31    | 3.9  | 6.9  |                                                                                                                        |                      |
| Wang 2005                          | Not applicable | 70   | 2005 | 6    | China             | Rosiglitazone | 4 mg daily                         | 60.1  | 8.5   | 83.3      | 7.29 | 0.17   | 26.1  | 2.5  | 100  | Other antidiabetic drugs                                                                                               |                      |
| Wang 2005                          |                |      |      |      |                   | Control       |                                    | 62.2  | 8.6   | 80        | 7.33 | 0.17   | 25.6  | 2.7  | 100  |                                                                                                                        |                      |
| Wang 2013                          | Not provided   | 90   | 2013 | 6    | China             | Metformin     | 1700 mg daily                      | 54    | 10.3  | 62.1      | 8.07 | 0.77   |       |      |      | None                                                                                                                   |                      |
| Wang 2013                          |                |      |      |      |                   | Gliclazide    | 120 mg daily                       | 55.89 | 10.5  | 70        | 8.4  | 0.93   |       |      |      |                                                                                                                        |                      |
| Wang 2013                          |                |      |      |      |                   | Acarbose      | 300 mg daily                       | 54.7  | 8.9   | 66.7      | 8.06 | 0.82   |       |      |      |                                                                                                                        |                      |
| Wang 2015                          | Not provided   | 90   | 2015 | 12   | China             | Saxagliptin   | 5 mg daily                         | 64.3  | 2.6   | 43.9      | 8.26 | 0.49   |       |      | 12.3 | Metformin                                                                                                              |                      |
| Wang 2015                          |                |      |      |      |                   | Acarbose      | 150 mg daily                       | 65.1  | 3.1   | 47.5      | 8.3  | 0.37   |       |      | 14.2 |                                                                                                                        |                      |
| Wang 2016                          | NCT02125097    | 306  | 2016 | 5.5  | Multinational     | Liraglutide   | 5 mg daily                         | 55.1  | 10.7  | 49.8      | 7.99 | 0.83   | 25.5  | 3.9  |      | Metformin                                                                                                              |                      |
| Wang 2016                          |                |      |      |      |                   | Placebo       |                                    | 56.5  | 8.7   | 50        | 8    | 0.8    | 25.8  | 4    |      |                                                                                                                        |                      |
| Wang 2016a                         | Not provided   | 28   | 2016 | 5.5  | China             | Dapagliflozin |                                    |       |       |           |      |        |       |      |      |                                                                                                                        |                      |

|                   |                |      |      |      |                   |                  |                  |                          |  |       |       |       |      |      |       |           |                                                        |
|-------------------|----------------|------|------|------|-------------------|------------------|------------------|--------------------------|--|-------|-------|-------|------|------|-------|-----------|--------------------------------------------------------|
| Xiao 2016         |                |      |      |      |                   | Staglipitin      | 100 mg daily     |                          |  | 68.7  | 6.3   | 56.5  | 7.32 | 1.01 | 28.34 | 3.81      |                                                        |
| Xu 2017           | NCT017909305   | 2195 | 2017 | 5.5  | China             | Glimepiride      | 6 mg daily       |                          |  | 53.5  | 9.8   | 53.9  | 7.68 | 0.74 | 25.9  | 3.3       | Metformin + staglipitin                                |
| Xu 2017           |                |      |      |      |                   | Glucoside        | 120 mg daily     |                          |  | 53.3  | 9.9   | 55.1  | 7.78 | 0.8  | 25.8  | 3.5       |                                                        |
| Xu 2017           |                |      |      |      |                   | Acarbose         | 300 mg daily     |                          |  | 52.6  | 10.2  | 56.6  | 7.7  | 0.72 | 25.7  | 3.4       |                                                        |
| Xu 2017           |                |      |      |      |                   | Repaglinide      | 16 mg daily      |                          |  | 52.1  | 9.9   | 54.1  | 7.74 | 0.73 | 25.9  | 3.3       |                                                        |
| Yakubu 2017       | ISCTRN34145972 | 366  | 2017 | 6    | Japan             | Metformin        | 1000 mg daily    |                          |  |       |       |       |      |      |       |           | None                                                   |
| Yakubu 2017       |                |      |      |      |                   | Pioglitazone     | 30 mg daily      |                          |  |       |       |       |      |      |       |           |                                                        |
| Yakubu 2017       |                |      |      |      |                   | Staglipitin      | 100 mg daily     |                          |  |       |       |       |      |      |       |           |                                                        |
| Yakubu 2017       |                |      |      |      |                   | Control          |                  |                          |  |       |       |       |      |      |       |           |                                                        |
| Yale 2013         | Not provided   | 269  | 2013 | 6    | Multinational     | Canagliflozin    | 300 mg daily     | Chronic kidney disease   |  | 67.9  | 8.2   | 53.9  | 8    | 0.8  | 33.4  | 6.5       | None, monotherapy or combination therapy               |
| Yale 2013         |                |      |      |      |                   | Canagliflozin    | 100 mg daily     |                          |  | 69.5  | 8.2   | 64.4  | 7.9  | 0.9  | 32.4  | 5.5       |                                                        |
| Yale 2013         |                |      |      |      |                   | Placebo          |                  |                          |  | 68.2  | 8.4   | 63.3  | 8    | 0.9  | 31.1  | 6.5       |                                                        |
| Yamakage 2019     | UMIN000021479  | 54   | 2019 | 5.5  | Japan             | Dapagliflozin    | 5 mg daily       |                          |  | 58.4  | 13.0  | 40.7  | 7.5  | 0.8  | 31.3  | 7.6       |                                                        |
| Yamakage 2019     |                |      |      |      |                   | Control          |                  |                          |  | 60.7  | 11.9  | 51.9  | 7.4  | 0.9  | 30.7  | 6.2       |                                                        |
| Yamakage 2019     |                |      |      |      |                   |                  |                  |                          |  |       |       |       |      |      |       |           | 76.2                                                   |
| Yamakage 2019     |                |      |      |      |                   |                  |                  |                          |  |       |       |       |      |      |       |           | 73                                                     |
| Yamamoto 2018     | UMIN000028313  | 25   | 2018 | 5.5  | Japan             | Liraglutide      | 0.9 mg daily     |                          |  | 60    | 7.8   | 66.7  | 7.3  | 1.2  | 27.8  | 3.1       | Basal insulin with or without oral hypoglycemic agents |
| Yamamoto 2018     |                |      |      |      |                   | Canagliflozin    | 100 mg daily     |                          |  | 61.5  | 10.6  | 61.5  | 6.9  | 0.8  | 25.9  | 4.2       |                                                        |
| Yamanouchi 2005   | Not applicable | 114  | 2005 | 12   | Japan             | Metformin        | 750 mg daily     |                          |  | 54.7  | 9.8   | 51.3  | 9.9  | 0.7  | 26.2  | 3.8       | None                                                   |
| Yamanouchi 2005   |                |      |      |      |                   | Glimepiride      | 1-2 mg daily     |                          |  | 55.6  | 9.3   | 51.4  | 9.8  | 0.7  | 25.6  | 3.5       |                                                        |
| Yamanouchi 2005   |                |      |      |      |                   | Pioglitazone     | 30-45 mg daily   |                          |  | 55.2  | 9.2   | 47.4  | 10.2 | 0.8  | 25.8  | 4.2       |                                                        |
| Yamasaki 2005     | Not applicable | 103  | 2005 | 39.6 | Japan             | Voglibose        | 0.4-0.6 mg daily |                          |  | 58.6  | 7.5   | 51    | 8.2  | 1.3  | 23    | 3.67      | Diet, Sulphonylurea; insulin                           |
| Yamasaki 2005     |                |      |      |      |                   | Control          |                  |                          |  | 60.4  | 9.6   | 60    | 8.4  | 1.4  | 22.7  | 2.92      |                                                        |
| Yan 2019          | NCT02147925    | 75   | 2019 | 6    | China             | Staglipitin      | 100 mg daily     |                          |  | 45.7  | 9.2   | 77.8  | 7.6  | 0.9  | 29.7  | 2.8       | Metformin                                              |
| Yan 2019          |                |      |      |      |                   | Liraglutide      | 1.8 mg daily     |                          |  | 43.1  | 9.7   | 70.8  | 7.8  | 1.4  | 30.1  | 3.3       |                                                        |
| Yan 2019          |                |      |      |      |                   | Insulin glargine | Titrated         |                          |  | 45.6  | 7.6   | 58.3  | 7.7  | 0.9  | 29.6  | 3.5       |                                                        |
| Yang 2002         | Not applicable | 64   | 2002 | 6    | Unclear           | Rosiglitazone    | 2 mg twice daily |                          |  | 58.9  | 9.4   | 43.3  | 9.5  | 1.1  | 25.76 | 2.87      | Sulphonylurea                                          |
| Yang 2002         |                |      |      |      |                   | Placebo          |                  |                          |  | 57.8  | 8.9   | 38.2  | 9.7  | 1.4  | 25.84 | 3.5       |                                                        |
| Yang 2011         | NCT00661362    | 570  | 2011 | 5.5  | Multinational     | Saxagliptin      | 5 mg daily       |                          |  | 53.8  | 10.4  | 48.1  | 7.9  | 0.8  | 26.3  | 3.6       | Metformin                                              |
| Yang 2011         |                |      |      |      |                   | Placebo          |                  |                          |  | 54.4  | 10.1  | 48.4  | 7.9  | 0.8  | 26.1  | 3.5       |                                                        |
| Yang 2012         | NCT00813995    | 395  | 2012 | 5.5  | China             | Staglipitin      | 100 mg daily     |                          |  | 54.1  | 9     | 47    | 8.5  | 0.9  | 25.3  | 3.1       | Metformin                                              |
| Yang 2012         |                |      |      |      |                   | Placebo          |                  |                          |  | 55.1  | 9.8   | 55    | 8.5  | 0.9  | 25.3  | 3.6       |                                                        |
| Yang 2013         | Not provided   | 182  | 2013 | 5.5  | Republic of Korea | Gempigliptin     | 50 mg daily      |                          |  | 54    | 49-60 | 65.5  | 8.2  | 1    | 25.4  | 22.8-28.1 | None                                                   |
| Yang 2013         |                |      |      |      |                   | Placebo          |                  |                          |  | 52    | 45-60 | 50.6  | 8.3  | 1.1  | 26.7  | 23.6-29.1 | 2.86                                                   |
| Yang 2015         | Not provided   | 109  | 2015 | 5.5  | Korea             | Anagliptin       | 200 mg daily     |                          |  | 54.43 | 9.86  | 46.54 | 7.13 | 0.72 | 24.6  | 3.01      | None                                                   |
| Yang 2015         |                |      |      |      |                   | Anagliptin       | 100 mg daily     |                          |  | 57.7  | 9.71  | 60    | 7.19 | 0.73 | 24.97 | 2.64      |                                                        |
| Yang 2015         |                |      |      |      |                   | Placebo          |                  |                          |  | 56.74 | 9.72  | 63.16 | 7.11 | 0.63 | 25.44 | 3.19      |                                                        |
| Yang 2015a        | NCT01357252    | 279  | 2015 | 5.5  | China             | Vildagliptin     | 50 mg daily      |                          |  | 58.3  | 9.8   | 55.2  | 8.6  | 0.9  | 24.8  | 3         | Sulfonylurea                                           |
| Yang 2015a        |                |      |      |      |                   | Placebo          |                  |                          |  | 58.7  | 9.3   | 58.1  | 8.7  | 1    | 25    | 2.8       |                                                        |
| Yang 2016         | NCT01095666    | 444  | 2016 | 5.5  | Multinational     | Dapagliflozin    | 10 mg daily      |                          |  | 54.6  | 9.5   | 57.9  | 8.17 | 0.84 | 29.2  | 3.5       | Metformin                                              |
| Yang 2016         |                |      |      |      |                   | Dapagliflozin    | 5 mg daily       |                          |  | 53.1  | 9.1   | 45.6  | 8.09 | 0.72 | 26.4  | 3.5       |                                                        |
| Yang 2016         |                |      |      |      |                   | Placebo          |                  |                          |  | 53.5  | 9.2   | 59.3  | 8.13 | 0.85 | 25.7  | 2.9       |                                                        |
| Yang 2018         | NCT02096705    | 272  | 2018 | 5.5  | Multinational     | Dapagliflozin    | 10 mg daily      |                          |  | 56.5  | 8.4   | 47.5  | 8.52 | 0.76 | 26.4  | 3.8       | Insulin with or without oral antidiabetic drugs        |
| Yang 2018         |                |      |      |      |                   | Placebo          |                  |                          |  | 58.6  | 8.9   | 48.1  | 8.58 | 0.81 | 26.7  | 3.3       |                                                        |
| Yee 2010          | NCT00231387    | 57   | 2010 | 12   | England           | Rosiglitazone    | 4-8 mg daily     | High cardiovascular risk |  | 62.6  | 8.2   | 78.6  | 7.65 | 1.09 | 28    | 26.2-30.0 | 7.5                                                    |
| Yee 2010          |                |      |      |      |                   | Placebo          |                  |                          |  | 66.1  | 6     | 79.3  | 7.55 | 1.38 | 28.4  | 26.7-30.1 | 10                                                     |
| Yki-Järvinen 1999 | Not applicable | 31   | 1999 | 12   | Finland           | Metformin        | 2000 mg daily    |                          |  | 57    | 8.7   | 58    | 9.8  | 1.7  | 28.9  | 4.8       | Sulfonylurea                                           |
| Yki-Järvinen 1999 |                |      |      |      |                   | Gliburide        | 10.5 mg daily    |                          |  | 61    | 9.4   | 59    | 9.8  | 1.4  | 29.7  | 4.7       |                                                        |
| Yki-Järvinen 2013 | NCT00954447    | 1261 | 2013 | 12   | Multinational     | Liraglutin       | 5 mg daily       |                          |  | 59.7  | 9.9   | 52.1  | 8.31 | 0.85 | 30.8  | 5.4       | Insulin ± metformin and/or thiazolidinedione           |
| Yki-Järvinen 2013 |                |      |      |      |                   | Placebo          |                  |                          |  | 60.4  | 10    | 52.2  | 8.29 | 0.85 | 31.2  | 4.9       |                                                        |
| Yoon 2011         | NCT00397631    | 520  | 2011 | 5.5  | Multinational     | Staglipitin      | 100 mg daily     |                          |  | 50.2  | 10.2  | 52.5  | 9.5  | 1.2  | 29.7  | 5.1       | None                                                   |
| Yoon 2011         |                |      |      |      |                   | Placebo          |                  |                          |  | 51.7  | 11.2  | 56    | 9.5  | 1.2  | 29.6  | 5.2       |                                                        |
| Yoon 2011a        | Not provided   | 349  | 2011 | 11   | Republic of Korea | Metformin        | 2000 mg daily    |                          |  | 51.8  | 8.5   | 57.9  | 7.9  | 0.8  | 25.7  | 3.2       | None                                                   |
| Yoon 2011a        |                |      |      |      |                   | Glimepiride      | 8 mg daily       |                          |  | 50.8  | 8.9   | 55.9  | 7.8  | 0.8  | 25.5  | 3.1       |                                                        |
| Yoon 2011a        |                |      |      |      |                   | Rosiglitazone    | 8 mg daily       |                          |  | 50.1  | 8.2   | 52.14 | 7.8  | 0.8  | 25.8  | 3.3       |                                                        |
| Yuan 2012         | Not provided   | 59   | 2012 | 6    | China             | Metformin        | 1500 mg daily    |                          |  | 56.8  | 7.6   | 46.2  | 8.11 | 1.92 | 29.3  | 2.6       | None                                                   |
| Yuan 2012         |                |      |      |      |                   | Evenamide        | 20 µg daily      |                          |  | 58.5  | 10.6  | 51.5  | 8.27 | 1.58 | 30.6  | 2.8       |                                                        |
| Zang 2016         | NCT02008682    | 368  | 2016 | 6    | China             | Staglipitin      | 100 mg daily     |                          |  | 51.4  | 11    | 63.6  | 8.11 | 0.78 | 27.2  | 4         | Metformin                                              |
| Zang 2016         |                |      |      |      |                   | Liraglutide      | 1.8 mg daily     |                          |  | 51.7  | 10.7  | 55.7  | 8.14 | 0.83 | 27.3  | 3.4       |                                                        |
| ZELUS II          | NCT02831361    | 283  | 2020 | 5.5  | Korea and         | Gempigliptin     | 50 mg daily      |                          |  | 61.1  | 8.6   | 32.4  | 8.4  | 1    | 26.7  | 4.1       | Insulin with or without metformin                      |
| ZELUS II          |                |      |      |      |                   | Placebo          |                  |                          |  | 59    | 10.3  | 30.5  | 8.4  | 1    | 26.8  | 4.2       |                                                        |
| Zhang 2020        | Not provided   | 60   | 2020 | 5.5  | China             | Pioglitazone     | 30 mg daily      |                          |  | 51.5  | 12.1  | 50.0  | 8.1  | 1.7  | 27.1  | 3.8       | Metformin                                              |
| Zhang 2020        |                |      |      |      |                   | Liraglutide      | 1.2 mg daily     |                          |  | 50.2  | 11.5  | 43.3  | 8.1  | 2.0  | 27.6  | 5.2       |                                                        |
| Zheng 2019        | Not provided   | 91   | 2019 | 6    | China             | Liraglutide      |                  |                          |  |       |       |       |      |      |       |           | Metformin and insulin                                  |
| Zheng 2019        |                |      |      |      |                   | Control          |                  |                          |  |       |       |       |      |      |       |           |                                                        |
| Zhu 2003          | Not applicable | 554  | 2003 | 5.5  | China             | Rosiglitazone    | 8 mg daily       |                          |  | 58.9  | 6.9   | 48    | 9.9  | 1.6  | 24.9  | 3.1       | 7.9                                                    |
| Zhu 2003          |                |      |      |      |                   | Rosiglitazone    | 4 mg daily       |                          |  | 59    | 7.5   | 41    | 9.8  | 1.5  | 24.8  | 3.4       | 7.2                                                    |
| Zhu 2003          |                |      |      |      |                   | Placebo          |                  |                          |  | 58.8  | 7.7   | 46    | 9.8  | 1.3  | 25.1  | 2.8       | 7.6                                                    |
| Zib 2007          | Not provided   | 32   | 2007 | 6    | USA               | Pioglitazone     | 15-30 mg daily   |                          |  | 51    | 9     | 43.8  | 11   | 2.8  | 32    | 8         | 5.6                                                    |
| Zib 2007          |                |      |      |      |                   | Control          |                  |                          |  | 47    | 11    | 50    | 10.6 | 1.4  | 33    | 7         | 6.6                                                    |

## **Appendix 2**

### **Reference list for included studies**

#### **3D**

Oe H, Nakamura K, Kihara H, et al. Comparison of effects of sitagliptin and voglibose on left ventricular diastolic dysfunction in patients with type 2 diabetes: Results of the 3D trial. *Cardiovasc Diabetol* 2015;**14**(1):83

#### **4B**

Diamant M, Nauck MA, Shaginian R, et al. Glucagon-like peptide 1 receptor agonist or bolus insulin with optimized basal insulin in type 2 diabetes. *Diabetes Care* 2014;**37**(10):2763-73

#### **4T**

Holman RR, Thorne KI, Farmer AJ, et al. Addition of biphasic, prandial, or basal insulin to oral therapy in type 2 diabetes. *N Engl J Med* 2007;**357**(17):1716-30

#### **1860-LIRA-DPP-4**

Pratley RE, Nauck M, Bailey T, et al. Liraglutide versus sitagliptin for patients with type 2 diabetes who did not have adequate glycaemic control with metformin: a 26-week, randomised, parallel-group, open-label trial. *Lancet* 2010;**375**(9724):1447-56

#### **Abe 2008**

Abe M, Okada K, Maruyama T, et al. Clinical effectiveness and safety evaluation of long-term pioglitazone treatment for erythropoietin responsiveness and insulin resistance in type 2 diabetic patients on hemodialysis. *Expert Opin Pharmacother* 2010;**11**(10):1611-20

#### **Abe 2016**

Abe M, Higuchi T, Moriuchi M, et al. Efficacy and safety of saxagliptin, a dipeptidyl peptidase-4 inhibitor, in hemodialysis patients with diabetic nephropathy: A randomized open-label prospective trial. *Diabetes Res Clin Pract* 2016;**116**:244-52

#### **ACTION-J**

Yasunari E, Takeno K, Funayama H, et al. Efficacy of pioglitazone on glycemic control and carotid intima-media thickness in type 2 diabetes patients with inadequate insulin therapy. *J Diabetes Invest* 2011;**2**(1):56-62

#### **ADOPT**

Kahn SE, Haffner SM, Heise MA, et al. Glycemic durability of rosiglitazone, metformin, or glyburide monotherapy. *N Engl J Med* 2006;**355**(23):2427-43

#### **Ahmann 2015**

Ahmann A, Rodbard HW, Rosenstock J, et al. Efficacy and safety of liraglutide versus placebo added to basal insulin analogues (with or without metformin) in patients with type 2 diabetes: A randomized, placebo-controlled trial. *Diab Obes Metab* 2015;**17**(11):1056-64

#### **Ahrén 2004**

Ahrén B, Gomis R, Standl E, et al. Twelve- and 52-week efficacy of the dipeptidyl peptidase IV inhibitor LAF237 in metformin-treated patients with type 2 diabetes. *Diabetes Care* 2004;**27**(12):2874-80

#### **Allegretti 2019**

Allegretti AS, Zhang W, Zhou W, et al. Safety and effectiveness of bexagliflozin in patients with type 2 diabetes mellitus and stage 3a/3b CKD. *American Journal of Kidney Diseases* 2019;**74**(3):328-37

#### **Alogliptin Study 007**

Pratley RE, Kipnes MS, Fleck PR, et al. Efficacy and safety of the dipeptidyl peptidase-4 inhibitor alogliptin in patients with type 2 diabetes inadequately controlled by glyburide monotherapy. *Diabetes Obes Metab* 2009;**11**(2):167-76

#### **Alogliptin Study 009**

Pratley RE, Reusch JE, Fleck PR, et al. Efficacy and safety of the dipeptidyl peptidase-4 inhibitor alogliptin added to pioglitazone in patients with type 2 diabetes: a randomized, double-blind, placebo-controlled study. *Curr Med Res Opin* 2009;**25**(10):2361-71

#### **Alogliptin Study 010**

DeFronzo RA, Fleck PR, Wilson CA, et al. Efficacy and safety of the dipeptidyl peptidase-4 inhibitor alogliptin in patients with type 2 diabetes and inadequate glycemic control: a randomized, double-blind, placebo-controlled study. *Diabetes Care* 2008;**31**(12):2315-7

#### **Alvarsson 2003**

Alvarsson M, Sundkvist G, Lager I, et al. Beneficial effects of insulin versus sulphonylurea on insulin secretion and metabolic control in recently diagnosed type 2 diabetic patients. *Diabetes Care* 2003;**26**(8):2231-7

#### **APOLLO**

Bretzel RG, Nuber U, Landgraf W, et al. Once-daily basal insulin glargine versus thrice-daily prandial insulin lispro in people with type 2 diabetes on oral hypoglycaemic agents (APOLLO): an open randomised controlled trial. *Lancet* 2008;**371**(9618):1073-84

#### **Apovian 2010**

Apovian CM, Bergenstal RM, Cuddihy RM, et al. Effects of exenatide combined with lifestyle modification in patients with type 2 diabetes. *Am J Med* 2010;**123**(5):468.e9-17

#### **APPROACH**

Gerstein HC, Ratner RE, Cannon CP, et al. Effect of rosiglitazone on progression of coronary atherosclerosis in patients with type 2 diabetes mellitus and coronary artery disease: the assessment on the prevention of progression by rosiglitazone on atherosclerosis in diabetes patients with cardiovascular history trial. *Circulation* 2010;**121**(10):1176-87

#### **APRIME**

Morikawa A, Ishizeki K, Iwashima Y, et al. Pioglitazone reduces urinary albumin excretion in renin-angiotensin system inhibitor-treated type 2 diabetic patients with hypertension and microalbuminuria: the APRIME study. *Clin Exp Nephrol* 2011;**15**(6):848-53

#### **Araki 2015**

Araki E, Tanizawa Y, Tanaka Y, et al. Long-term treatment with empagliflozin as add-on to oral antidiabetes therapy in Japanese patients with type 2 diabetes mellitus. *Diabetes Obes Metab* 2015;**17**(7):665-74

#### **Araki 2015a**

Araki E, Inagaki N, Tanizawa Y, et al. Efficacy and safety of once-weekly dulaglutide in combination with sulphonylurea and/or biguanide compared with once-daily insulin glargine in Japanese patients with type 2 diabetes: a randomized, open-label, phase III, non-inferiority study. *Diabetes Obes Metab* 2015;**17**(10):994-1002

**Arechavaleta 2011**

Arechavaleta R, Seck T, Chen Y, et al. Efficacy and safety of treatment with sitagliptin or glimepiride in patients with type 2 diabetes inadequately controlled on metformin monotherapy: a randomized, double-blind, non-inferiority trial. *Diabetes Obes Metab* 2011;**13**(2):160-8

**Arjona Ferreira 2013**

Arjona Ferreira JC, Corry D, Mogensen CE, et al. Efficacy and safety of sitagliptin in patients with type 2 diabetes and ESRD receiving dialysis: a 54-week randomized trial. *Am J Kidney Dis* 2013;**61**(4):579-87

**Arjona Ferreira 2013a**

Arjona Ferreira JC, Marre M, Barzilai N, et al. Efficacy and safety of sitagliptin versus glipizide in patients with type 2 diabetes and moderate-to-severe chronic renal insufficiency. *Diabetes Care* 2013;**36**(5):1067-73

**Arturi 2017**

Arturi F, Succurro E, Miceli S, et al. Liraglutide improves cardiac function in patients with type 2 diabetes and chronic heart failure. *Endocrine* 2017;**57**(3):464-73

**Asian Acarbose Study**

Chan JC, Chan KW, Ho LL, et al. An Asian multicenter clinical trial to assess the efficacy and tolerability of acarbose compared with placebo in type 2 diabetic patients previously treated with diet. Asian Acarbose Study Group. *Diabetes Care* 1998;**21**(7):1058-61

**Aso 2019**

Aso Y, Kato K, Sakurai S, et al. Impact of dapagliflozin, an SGLT2 inhibitor, on serum levels of soluble dipeptidyl peptidase-4 in patients with type 2 diabetes and non-alcoholic fatty liver disease. *International Journal of Clinical Practice* 2019;**73**(5):e13335

**Avilés-Santa 1999**

Avilés-Santa L, Sinding J, Raskin P. Effects of metformin in patients with poorly controlled, insulin-treated type 2 diabetes mellitus. A randomized, double-blind, placebo-controlled trial. *Ann Intern Med* 1999;**131**(3):182-8

**AWARD-1**

Wysham C, Blevins T, Arakaki R, et al. Efficacy and safety of dulaglutide added onto pioglitazone and metformin versus exenatide in type 2 diabetes in a randomized controlled trial (AWARD-1). *Diabetes Care* 2014;**37**(8):2159-67

**AWARD-2**

Giorgino F, Benroubi M, Sun JH, et al. Efficacy and safety of once-weekly dulaglutide versus insulin glargine in patients with type 2 diabetes on metformin and glimepiride (AWARD-2). *Diabetes Care* 2015;**38**(12):2241-9

**AWARD-3**

Umpierrez G, Povedano ST, Manghi FP, et al. Efficacy and safety of dulaglutide monotherapy versus metformin in type 2 diabetes in a randomized controlled trial (AWARD-3). *Diabetes Care* 2014;**37**(8):2168-76

**AWARD-4**

Blonde L, Jendle J, Gross J, et al. Once-weekly dulaglutide versus bedtime insulin glargine, both in combination with prandial insulin lispro, in patients with type 2 diabetes (AWARD-4): a randomised, open-label, phase 3, non-inferiority study. *Lancet* 2015;**385**(9982):2057-66

**AWARD-5**

Nauck M, Weinstock RS, Umpierrez GE, et al. Efficacy and safety of dulaglutide versus sitagliptin after 52 weeks in type 2 diabetes in a randomized controlled trial (AWARD-5). *Diabetes Care* 2014;**37**(8):2149-58

**AWARD-7**

Tuttle KR, Lakshmanan MC, Rayner B, et al. Dulaglutide versus insulin glargine in patients with type 2 diabetes and moderate-to-severe chronic kidney disease (AWARD-7): a multicentre, open-label, randomised trial. *The Lancet Diabetes and Endocrinology* 2018;**6**(8):605-17

**AWARD-8**

Dungan KM, Weitgasser R, Perez Manghi F, et al. A 24-week study to evaluate the efficacy and safety of once-weekly dulaglutide added on to glimepiride in type 2 diabetes (AWARD-8). *Diabetes Obes Metab* 2016;**18**(5):475-82

**AWARD-9**

Pozzilli P, Norwood P, Jodar E, et al. Placebo-controlled, randomized trial of the addition of once-weekly glucagon-like peptide-1 receptor agonist dulaglutide to titrated daily insulin glargine in patients with type 2 diabetes (AWARD-9). *Diabetes Obes Metab* 2017;**19**(7):1024-31

**AWARD-9**

Pozzilli P, Norwood P, Jodar E, et al. Improved glycemic control and weight loss with once-weekly dulaglutide vs. placebo, both added to titrated daily insulin glargine, in type 2 diabetes patients (AWARD-9). *Diabetes* 2016;**65**(Supplement 1):A62

**AWARD-10**

Ludvik B, Frias JP, Tinahones FJ, et al. Dulaglutide as add-on therapy to SGLT2 inhibitors in patients with inadequately controlled type 2 diabetes (AWARD-10): a 24-week, randomised, double-blind, placebo-controlled trial. *The Lancet Diabetes and Endocrinology* 2018;**6**(5):370-81

**AWARD-CHN1**

Chen YH, Huang CN, Cho YM, et al. Efficacy and safety of dulaglutide monotherapy compared with glimepiride in East-Asian patients with type 2 diabetes in a multicentre, double-blind, randomized, parallel-arm, active comparator, phase III trial. *Diabetes Obes Metab* 2018;**20**(9):2121-30

**Ba 2017**

Ba J, Han P, Yuan G, et al. Randomized trial assessing the safety and efficacy of sitagliptin in Chinese patients with type 2 diabetes mellitus inadequately controlled on sulfonylurea alone or combined with metformin. *J Diabetes* 2017;**9**:667-76

**Bachmann 2003**

Bachmann W, Petzinna D, Raptis SA, et al. Long-term improvement of metabolic control by acarbose in type 2 diabetes patients poorly controlled with maximum sulfonylurea therapy. *Clin Drug Invest* 2003;**23**(10):679-86

**Bailey 2010**

Bailey CJ, Gross JL, Pieters A, et al. Effect of dapagliflozin in patients with type 2 diabetes who have inadequate glycaemic control with metformin: a randomised, double-blind, placebo-controlled trial. *Lancet* 2010;**375**(9733):2223-33

**Bailey 2012**

Bailey CJ, Iqbal N, T'Joel C, et al. Dapagliflozin monotherapy in drug-naïve patients with diabetes: a randomized-controlled trial of low-dose range. *Diabetes Obes Metab* 2012;**14**(10):951-9

**Bajaj 2014**

Bajaj M, Gilman R, Patel S, et al. Linagliptin improved glycaemic control without weight gain or hypoglycaemia in patients with Type 2 diabetes inadequately controlled by a combination of metformin and pioglitazone: A 24-week randomized, double-blind study. *Diabet Med* 2014;**31**(12):1505-14

**Bakris 2006**

Bakris GL, Ruilope LM, McMorn SO, et al. Rosiglitazone reduces microalbuminuria and blood pressure independently of glycemia in type 2 diabetes patients with microalbuminuria. *J Hypertens* 2006;**24**(10):2047-55

**BALANCE**

Bae JC, Min KW, Kim YH, et al. Efficacy and safety of fixed-dose combination therapy with gemigliptin (50 mg) and rosuvastatin compared with monotherapy in patients with type 2 diabetes and dyslipidaemia (BALANCE): A multicentre, randomized, double-blind, controlled, phase 3 trial. *Diabetes, obesity & metabolism* 2019;**21**(1):103-11

**Banerji 1995**

Banerji MA, Chaiken RL, Lebovitz HE. Prolongation of near-normoglycemic remission in black NIDDM subjects with chronic low-dose sulfonylurea treatment. *Diabetes* 1995;**44**(4):466-70

**Barnett 2003**

Barnett AH, Grant PJ, Hitman GA, et al. Rosiglitazone in Type 2 diabetes mellitus: an evaluation in British Indo-Asian patients. *Diabetic Med* 2003;**20**(5):387-93

**Barnett 2012**

Barnett AH, Charbonnel B, Donovan M, et al. Effect of saxagliptin as add-on therapy in patients with poorly controlled type 2 diabetes on insulin alone or insulin combined with metformin. *Curr Med Res Opin* 2012;**28**(4):513-23

**Barnett 2013**

Barnett AH, Huisman H, Jones R, et al. Linagliptin for patients aged 70 years or older with type 2 diabetes inadequately controlled with common antidiabetes treatments: a randomised, double-blind, placebo-controlled trial. *Lancet* 2013;**382**(9902):1413-23

**Barzilai 2011**



Barzilai N, Guo H, Mahoney EM, et al. Efficacy and tolerability of sitagliptin monotherapy in elderly patients with type 2 diabetes: a randomized, double-blind, placebo-controlled trial. *Curr Med Res Opin* 2011;**27**(5):1049-58

#### **Bayrasheva 2020**

Bayrasheva VK, Pchelin IY, Dobronravov VA, et al. Short-term renal and metabolic effects of low dose vildagliptin treatment added-on insulin therapy in non-proteinuric patients with type 2 diabetes: open-label randomized prospective study. *Arch Endocrinol Metab* 2020;**64**(4):418-26

#### **BEGIN: ADD TO GLP-1**

Aroda VR, Bailey TS, Cariou B, et al. Effect of adding insulin degludec to treatment in patients with type 2 diabetes inadequately controlled with metformin and liraglutide: a double-blind randomized controlled trial (BEGIN: ADD TO GLP-1 Study). *Diab Obes Metab* 2016;**18**(7):663-70

#### **BEGIN: VICTOZA ADD-ON**

Mathieu C, Rodbard HW, Cariou B, et al. A comparison of adding liraglutide versus a single daily dose of insulin aspart to insulin degludec in subjects with type 2 diabetes (BEGIN: VICTOZA ADD-ON). *Diabetes Obes Metab* 2014;**16**(7):636-44

#### **Berberoglu 2010**

Berberoglu Z, Yazici AC, Demirag NG. Effects of rosiglitazone on bone mineral density and remodelling parameters in postmenopausal diabetic women: a 2-year follow-up study. *Clin Endocrinol* 2010;**73**(3):305-12

#### **Bergenstal 2009**

Bergenstal R, Lewin A, Bailey T, et al. Efficacy and safety of biphasic insulin aspart 70/30 versus exenatide in subjects with type 2 diabetes failing to achieve glycemic control with metformin and a sulfonylurea. *Curr Med Res Opin* 2009;**25**(1):65-75

#### **Berndt-Zipfel 2013**

Berndt-Zipfel C, Michelson G, Dworak M, et al. Vildagliptin in addition to metformin improves retinal blood flow and erythrocyte deformability in patients with type 2 diabetes mellitus - results from an exploratory study. *Cardiovasc Diabetol* 2013;**12**(1):59

#### **BEST**

Retnakaran R, Qi Y, Opsteen C, et al. Initial short-term intensive insulin therapy as a strategy for evaluating the preservation of beta-cell function with oral antidiabetic medications: a pilot study with sitagliptin. *Diabetes Obes Metab* 2010;**12**(10):909-15

#### **BETA**

Moon JS, Ha KS, Yoon JS, et al. The effect of glargine versus glimepiride on pancreatic beta-cell function in patients with type 2 diabetes uncontrolled on metformin monotherapy: Open-label, randomized, controlled study. *Acta Diabetol* 2014;**51**(2):277-85

#### **Bi 2013**

Bi Y, Tong GY, Yang HJ, et al. The beneficial effect of metformin on beta-cell function in non-obese Chinese subjects with newly diagnosed type 2 diabetes. *Diabetes Metab Res Rev* 2013;**29**(8):664-72

**Bilezikian 2013**

Rubin MR, Manavalan JS, Agarwal S, et al. Effects of rosiglitazone vs metformin on circulating osteoclast and osteogenic precursor cells in postmenopausal women with type 2 diabetes mellitus. *J Clin Endocrinol Metab* 2014;**99**(10):E1933-42

**Birkeland 1994a**

Birkeland KI, Hanssen KF, Urdal P, et al. A long-term, randomized, comparative study of insulin versus sulfonylurea therapy in type 2 diabetes. *J Intern Med* 1994;**236**(3):305-13

**Bode 2013**

Bode B, Stenlöf K, Sullivan D, et al. Efficacy and safety of canagliflozin treatment in older subjects with type 2 diabetes mellitus: a randomized trial. *Hosp Pract (1995)* 2013;**41**(2):72-84

**Bolinder 2012**

Bolinder J, Ljunggren Ö, Kullberg J, et al. Effects of dapagliflozin on body weight, total fat mass, and regional adipose tissue distribution in patients with type 2 diabetes mellitus with inadequate glycemic control on metformin. *J Clin Endocrinol Metab* 2012;**97**(3):1020-31

**Bolli 2009**

Bolli G, Dotta F, Colin L, et al. Comparison of vildagliptin and pioglitazone in patients with type 2 diabetes inadequately controlled with metformin. *Diabetes Obes Metab* 2009;**11**(6):589-95

**Borges 2011**

Borges JL, Bilezikian JP, Jones-Leone AR, et al. A randomized, parallel group, double-blind, multicentre study comparing the efficacy and safety of Avandamet (rosiglitazone/metformin) and metformin on long-term glycaemic control and bone mineral density after 80 weeks of treatment in drug-naïve type 2 diabetes mellitus patients. *Diabetes Obes Metab* 2011;**13**(11):1036-46

**Bosi 2007**

Bosi E, Camisasca RP, Collober C, et al. Effects of vildagliptin on glucose control over 24 weeks in patients with type 2 diabetes inadequately controlled with metformin. *Diabetes Care* 2007;**30**(4):890-5

**Bosi 2009**

Bosi E, Dotta F, Jia Y, et al. Vildagliptin plus metformin combination therapy provides superior glycaemic control to individual monotherapy in treatment-naïve patients with type 2 diabetes mellitus. *Diabetes Obes Metab* 2009;**11**(5):506-15

**Bosi 2011**

Bosi E, Ellis GC, Wilson CA, et al. Alogliptin as a third oral antidiabetic drug in patients with type 2 diabetes and inadequate glycaemic control on metformin and pioglitazone: a 52-week, randomized, double-blind, active-controlled, parallel-group study. *Diabetes Obes Metab* 2011;**13**(12):1088-96

**Bouchi 2017**

Bouchi R, Nakano Y, Fukuda T, et al. Reduction of visceral fat by liraglutide is associated with ameliorations of hepatic steatosis, albuminuria, and microinflammation in type 2 diabetic patients with insulin treatment: a randomized controlled trial. *Diabetes* 2017;**66**:A287-

**Braun 1996**

Braun D, Schonherr U, Mitzkat HJ. Efficacy of acarbose monotherapy in patients with type 2 diabetes: A double-blind study conducted in general practice. *Endocrinol Metab* 1996;**3**(4):275-80

**BRL-049653/334**

Hedblad B, Zambanini A, Nilsson P, et al. Rosiglitazone and carotid IMT progression rate in a mixed cohort of patients with type 2 diabetes and the insulin resistance syndrome: main results from the Rosiglitazone Atherosclerosis Study. *J Intern Med* 2007;**261**:293-305

**Bryson 2016**

Bryson A, Jennings PE, Deak L, et al. The efficacy and safety of teneligliptin added to ongoing metformin monotherapy in patients with type 2 diabetes: a randomized study with open label extension. *Expert Opin Pharmacother* 2016;**17**(10):1309-16

**Bunck 2009**

Bunck MC, Diamant M, Cornér A, et al. One-year treatment with exenatide improves beta-cell function, compared with insulin glargine, in metformin-treated type 2 diabetic patients: a randomized, controlled trial. *Diabetes Care* 2009;**32**(5):762-8

**Buse 2011**

Buse JB, Bergenstal RM, Glass LC, et al. Use of twice-daily exenatide in Basal insulin-treated patients with type 2 diabetes: a randomized, controlled trial. *Ann Intern Med* 2011;**154**(2):103-12

**Camerini-Davalos 1988**

Camerini-Davalos RA, Velasco CA, Reddi AS, et al. Delay of progression of diabetic microangiopathy. *Metabolism* 1988;**37**(2 Suppl 1):10-8

**Camerini-Davalos 1994**

Camerini-Davalos RA, Velasco CA, Reddi AS. Effect of insulin-glipizide combination on skeletal muscle capillary basement membrane width in diabetic patients. *Clin Ther* 1994;**16**(6):952-61

**Campbell 1994**

Campbell IW, Menzies DG, Chalmers J, et al. One year comparative trial of metformin and glipizide in type 2 diabetes mellitus. *Diabetes Metab* 1994;**20**(4):394-400

**CANDLE**

Tanaka A, Hisauchi I, Taguchi I, et al. Effects of canagliflozin in patients with type 2 diabetes and chronic heart failure: a randomized trial (CANDLE). *ESC Heart Failure* 2020

**CANTATA-D**

Lavalle-Gonzalez FJ, Januszewicz A, Davidson J, et al. Efficacy and safety of canagliflozin compared with placebo and sitagliptin in patients with type 2 diabetes on background metformin monotherapy: A randomised trial. *Diabetologia* 2013;**56**(12):2582-92

**CANTATA-D2**

Schernthaner G, Gross JL, Rosenstock J, et al. Canagliflozin compared with sitagliptin for patients with type 2 diabetes who do not have adequate glycemic control with metformin plus sulfonylurea: A 52-week randomized trial. *Diabetes Care* 2013;**36**(9):2508-15

**CANTATA-M**

Stenlöf K, Cefalu WT, Kim KA, et al. Efficacy and safety of canagliflozin monotherapy in subjects with type 2 diabetes mellitus inadequately controlled with diet and exercise. *Diabetes Obes Metab* 2013;**15**(4):372-82

#### **CANTATA-MSU**

Wilding JPH, Charpentier G, Hollander P, et al. Efficacy and safety of canagliflozin in patients with type 2 diabetes mellitus inadequately controlled with metformin and sulphonylurea: A randomised trial. *Int J Clin Pract* 2013;**67**(12):1267-82

#### **CANTATA-SU**

Cefalu WT, Leiter LA, Yoon KH, et al. Efficacy and safety of canagliflozin versus glimepiride in patients with type 2 diabetes inadequately controlled with metformin (CANTATA-SU): 52 week results from a randomised, double-blind, phase 3 non-inferiority trial. *Lancet* 2013;**382**(9896):941-50

#### **CANVAS**

Neal B, Perkovic V, Mahaffey KW, et al. Canagliflozin and cardiovascular and renal events in type 2 diabetes. *N Engl J Med* 2017;**377**(7):644-57

#### **Carlson 2019**

Carlson AL, Mullen DM, Mazze R, et al. Evaluation of insulin glargine and exenatide alone and in combination: A randomized clinical trial with continuous glucose monitoring and ambulatory glucose profile analysis. *Endocrine practice* 2019;**25**(4):306-14

#### **CARMELINA**

Rosenstock J, Perkovic V, Johansen OE, et al. Effect of Linagliptin vs Placebo on Major Cardiovascular Events in Adults With Type 2 Diabetes and High Cardiovascular and Renal Risk: the CARMELINA Randomized Clinical Trial. *JAMA* 2019;**321**(1):69-79

#### **CAROLINA**

Rosenstock J, Kahn SE, Johansen OE, et al. Effect of Linagliptin vs Glimepiride on Major Adverse Cardiovascular Outcomes in Patients with Type 2 Diabetes: the CAROLINA Randomized Clinical Trial. *JAMA - journal of the american medical association* 2019;**322**(12):1155-66

#### **Casner 1988**

Casner PR. Insulin-glyburide combination therapy for non-insulin-dependent diabetes mellitus: a long-term double-blind, placebo-controlled trial. *Clin Pharmacol Ther* 1988;**44**(5):594-603

#### **Cefalu 2015**

Cefalu WT, Leiter LA, de Bruin TW, et al. Dapagliflozin's effects on glycemia and cardiovascular risk factors in high-risk patients with type 2 diabetes: A 24-week, multicenter, randomized, double-blind, placebo-controlled study with a 28-week extension. *Diabetes Care* 2015;**38**(7):1218-27

#### **Chacra 2017**

Chacra A, Gantz I, Mendizabal G, et al. A randomised, double-blind, trial of the safety and efficacy of omarigliptin (a once-weekly DPP-4 inhibitor) in subjects with type 2 diabetes and renal impairment. *Int J Clin Pract* 2017;**71**(6):e12955

#### **Chakraborty 2011**

Chakraborty A, Chowdhury S, Bhattacharyya M. Effect of metformin on oxidative stress, nitrosative stress and inflammatory biomarkers in type 2 diabetes patients. *Diabetes Res Clin Pract* 2011;**93**(1):56-62

**Charbonnel 2013**

Charbonnel B, Steinberg H, Eymard E, et al. Efficacy and safety over 26 weeks of an oral treatment strategy including sitagliptin compared with an injectable treatment strategy with liraglutide in patients with type 2 diabetes mellitus inadequately controlled on metformin: a randomised clinical trial. *Diabetologia* 2013;**56**(7):1503-11

**Charpentier 2009**

Charpentier G, Halimi S. Earlier triple therapy with pioglitazone in patients with type 2 diabetes. *Diabetes Obes Metab* 2009;**11**(9):844-54

**Charpentier 2017**

Charpentier G. Is the combo of sulfonylurea plus metformin appropriate for first-line therapy of people newly diagnosed with type 2 Diabetes and with HbA1c  $\geq 7.6\%$  and  $\leq 9\%$ ? *Diabetes* 2017;**66**:A628-A29

**Chavez 2015**

Chavez AO, Guardado-Mendoza R, Varvel S, et al. Differential effect of pioglitazone, exenatide, and combination of pioglitazone and exenatide on plasma metabolites in type 2 diabetes. *Diabetes* 2015; 64:A529

**Chen 2015**

Chen Y, Ning G, Wang C, et al. Efficacy and safety of linagliptin monotherapy in Asian patients with inadequately controlled type 2 diabetes mellitus: A multinational, 24-week, randomized, clinical trial. *J Diabetes Invest* 2015;**6**(6):692-8

**Chen 2016**

Chen YH, Tarng DC, Chen HS. Renal outcomes of pioglitazone compared with acarbose in diabetic patients: A randomized controlled study. *PLoS ONE* 2016;**11**(11):e0165750

**Chiasson 1994**

Chiasson JL, Josse RG, Hunt JA, et al. The efficacy of acarbose in the treatment of patients with non-insulin-dependent diabetes mellitus. A multicenter controlled clinical trial. *Ann Intern Med* 1994;**121**(12):928-35

**Chiasson 2001**

Chiasson JL, Naditch L. The synergistic effect of miglitol plus metformin combination therapy in the treatment of type 2 diabetes. *Diabetes Care* 2001;**24**(6):989-94

**CHICAGO**

Mazzone T, Meyer PM, Feinstein SB, et al. Effect of pioglitazone compared with glimepiride on carotid intima-media thickness in type 2 diabetes: a randomized trial. *JAMA* 2006;**296**(21):2572-81

**Chien 2011**

Chien MN, Lee CC, Chen WC, et al. Effect of sitagliptin as add-on therapy in elderly type 2 diabetes patients with inadequate glycemic control in Taiwan. *Int J Gerontol* 2011;**5**(2):103-6

**Cho 2019**

Cho KY, Nakamura A, Omori K, et al. Effect of switching from pioglitazone to the sodium glucose co-transporter-2 inhibitor dapagliflozin on body weight and metabolism-related factors in patients with type 2 diabetes mellitus: An open-label, prospective, randomized, parallel-group comparison trial. *Diabetes, obesity & metabolism* 2019;**21**(3):710-14

**Choi 2004**

Choi D, Kim SK, Choi SH, et al. Preventative effects of rosiglitazone on restenosis after coronary stent implantation in patients with type 2 diabetes. *Diabetes Care* 2004;**27**(11):2654-60

**Chou 2008**

Chou HS, Palmer JP, Jones AR, et al. Initial treatment with fixed-dose combination rosiglitazone/glimepiride in patients with previously untreated type 2 diabetes. *Diabetes Obes Metab* 2008;**10**(8):626-37

**Chou 2012**

Chou HS, Truitt KE, Moberly JB, et al. A 26-week, placebo- and pioglitazone-controlled monotherapy study of rivoglitazone in subjects with type 2 diabetes mellitus. *Diabetes Obes Metab* 2012;**14**(11):1000-9

**CIMT**

Lundby-Christensen L, Tarnow L, Boesgaard TW, et al. Metformin versus placebo in combination with insulin analogues in patients with type 2 diabetes mellitus-the randomised, blinded Copenhagen Insulin and Metformin Therapy (CIMT) trial. *BMJ Open* 2016;**6**(2):e008376

**Civera 2008**

Civera M, Merchante A, Salvador M, et al. Safety and efficacy of repaglinide in combination with metformin and bedtime NPH insulin as an insulin treatment regimen in type 2 diabetes. *Diabetes Res Clin Pract* 2008;**79**(1):42-7

**COMPASS**

Takahata M, Nakamura A, Tajima K, et al. Comparative study of sitagliptin with pioglitazone in Japanese type 2 diabetic patients: the COMPASS randomized controlled trial. *Diabetes Obes Metab* 2013;**15**(5):455-62

**CompoSIT-I Study**

Roussel R, Garcia SD, Zhang Y, et al. Double-blind, randomized clinical trial comparing the efficacy and safety of continuing or discontinuing the dipeptidyl peptidase-4 inhibitor sitagliptin when initiating insulin glargine therapy in patients with type 2 diabetes: the CompoSIT-I Study. *Diabetes, obesity & metabolism* 2018

**CompoSIT-R**

Scott R, Morgan J, Zimmer Z, et al. A randomized clinical trial of the efficacy and safety of sitagliptin compared with dapagliflozin in patients with type 2 diabetes mellitus and mild renal insufficiency: The CompoSIT-R study. *Diabetes, Obesity and Metabolism* 2018;**20**(12):2876-84

**CONFIDENCE**

Xu W, Bi Y, Sun Z, et al. Comparison of the effects on glycaemic control and beta-cell function in newly diagnosed type 2 diabetes patients of treatment with exenatide, insulin or

pioglitazone: a multicentre randomized parallel-group trial (the CONFIDENCE study). *J Intern Med* 2015;**277**(1):137-50

**Coniff 1994**

Coniff RF, Shapiro JA, Seaton TB. Long-term efficacy and safety of acarbose in the treatment of obese subjects with non-insulin-dependent diabetes mellitus. *Arch Intern Med* 1994;**154**(21):2442-8

**Coniff 1995**

Coniff RF, Shapiro JA, Seaton TB, et al. Multicenter, placebo-controlled trial comparing acarbose (BAY g 5421) with placebo, tolbutamide, and tolbutamide-plus-acarbose in non-insulin-dependent diabetes mellitus. *Am J Med* 1995;**98**(5):443-51

**Coniff 1995a**

Coniff RF, Shapiro JA, Seaton TB, et al. A double-blind placebo-controlled trial evaluating the safety and efficacy of acarbose for the treatment of patients with insulin-requiring type II diabetes. *Diabetes Care* 1995;**18**(7):928-32

**Costa 1997**

Costa B, Piñol C. Acarbose in ambulatory treatment of non-insulin-dependent diabetes mellitus associated to imminent sulfonylurea failure: a randomised-multicentric trial in primary health-care. *Diabetes and Acarbose Research Group. Diabetes Res Clin Pract* 1997;**38**(1):33-40

**CREDESCENCE**

Perkovic V, Jardine MJ, Neal B, et al. Canagliflozin and renal outcomes in type 2 diabetes and nephropathy. *New England Journal of Medicine* 2019;**380**(24):2295-306

**Cusi 2019**

Cusi K, Bril F, Barb D, et al. Effect of canagliflozin treatment on hepatic triglyceride content and glucose metabolism in patients with type 2 diabetes. *Diabetes, Obesity and Metabolism* 2019;**21**(4):812-21

**CV181-011**

Rosenstock J, Aguilar-Salinas C, Klein E, et al. Effect of saxagliptin monotherapy in treatment-naïve patients with type 2 diabetes. *Curr Med Res Opin* 2009;**25**(10):2401-11

**CV181-013**

Hollander P, Li J, Allen E, et al. Saxagliptin added to a thiazolidinedione improves glycemic control in patients with type 2 diabetes and inadequate control on thiazolidinedione alone. *J Clin Endocrinol Metab* 2009;**94**(12):4810-9

**CV181-039**

Pfützner A, Paz-Pacheco E, Allen E, et al. Initial combination therapy with saxagliptin and metformin provides sustained glycaemic control and is well tolerated for up to 76 weeks. *Diabetes Obes Metab* 2011;**13**(6):567-76

**da Silva 2016**

da Silva G, Nogueira K, Fukui R, et al. Short and long term effects of a DPP-4 inhibitor versus bedtime NPH insulin as ADD-ON therapy in patients with type 2 diabetes. *Curr Pharm Design* 2016;**22**(44):6716-21

**Dailey 2004**

Dailey GE, Noor MA, Park JS, et al. Glycemic control with glyburide/metformin tablets in combination with rosiglitazone in patients with type 2 diabetes: a randomized, double-blind trial. *Am J Med* 2004;**116**(4):223-9

**Dapagliflozin 006**

Wilding JP, Woo V, Soler NG, et al. Long-term efficacy of dapagliflozin in patients with type 2 diabetes mellitus receiving high doses of insulin: a randomized trial. *Ann Intern Med* 2012;**156**(6):405-15

**DAPA-HF**

McMurray JJV, Solomon SD, Inzucchi SE, et al. Dapagliflozin in patients with heart failure and reduced ejection fraction. *N Engl J Med* 2019;**381**(21):1995-2008

**Dargie 2007**

Dargie HJ, Hildebrandt PR, Riegger GA, et al. A randomized, placebo-controlled trial assessing the effects of rosiglitazone on echocardiographic function and cardiac status in type 2 diabetic patients with New York Heart Association Functional Class I or II Heart Failure. *J Am Coll Cardiol* 2007;**49**(16):1696-704

**Davidson 2007**

Davidson JA, McMorn SO, Waterhouse BR, et al. A 24-week, multicenter, randomized, double-blind, placebo-controlled, parallel-group study of the efficacy and tolerability of combination therapy with rosiglitazone and sulfonylurea in African American and Hispanic American patients with type 2 diabetes inadequately controlled with sulfonylurea monotherapy. *Clin Ther* 2007;**29**(9):1900-14

**Davies 2013**

Davies M, Heller S, Sreenan S, et al. Once-weekly exenatide versus once- or twice-daily insulin detemir: randomized, open-label, clinical trial of efficacy and safety in patients with type 2 diabetes treated with metformin alone or in combination with sulfonylureas. *Diabetes Care* 2013;**36**(5):1368-76

**DECLARE-TIMI 58**

Wiviott SD, Raz I, Bonaca MP, et al. Dapagliflozin and cardiovascular outcomes in type 2 diabetes. *The New England journal of medicine* 2019;**380**(4):347-57

**DeFronzo 1995**

DeFronzo RA, Goodman AM. Efficacy of metformin in patients with non-insulin-dependent diabetes mellitus. The Multicenter Metformin Study Group. *N Engl J Med* 1995;**333**(9):541-9

**DeFronzo 2005**

DeFronzo RA, Ratner RE, Han J, et al. Effects of exenatide (exendin-4) on glycemic control and weight over 30 weeks in metformin-treated patients with type 2. *Diabetes Care* 2005;**28**(5):1092-100

**DeFronzo 2012**

DeFronzo RA, Burant CF, Fleck P, et al. Efficacy and tolerability of the DPP-4 inhibitor alogliptin combined with pioglitazone, in metformin-treated patients with type 2 diabetes. *J Clin Endocrinol Metab* 2012;**97**(5):1615-22



**DeFronzo 2015**

DeFronzo RA, Lewin A, Patel S, et al. Combination of empagliflozin and linagliptin as second-line therapy in subjects with type 2 diabetes inadequately controlled on metformin. *Diabetes Care* 2015;**38**(3):384-93

**Dei Cas 2017**

Dei Cas A, Spigoni V, Cito M, et al. Vildagliptin, but not glibenclamide, increases circulating endothelial progenitor cell number: A 12-month randomized controlled trial in patients with type 2 diabetes. *Cardiovasc Diabetol* 2017;**16**(1):27

**Dejager 2007**

Dejager S, Razac S, Foley JE, et al. Vildagliptin in drug-naïve patients with type 2 diabetes: a 24-week, double-blind, randomized, placebo-controlled, multiple-dose study. *Horm Metab Res* 2007;**39**(3):218-23

**del Prato 2003**

del Prato S, Erkelens DW, Leutenegger M. Six-month efficacy of benfluorex vs. placebo or metformin in diet-failed type 2 diabetic patients. *Acta Diabetol* 2003;**40**(1):20-7

**del Prato 2011**

Del Prato S, Barnett AH, Huisman H, et al. Effect of linagliptin monotherapy on glycaemic control and markers of  $\beta$ -cell function in patients with inadequately controlled type 2 diabetes: a randomized controlled trial. *Diabetes Obes Metab* 2011;**13**(3):258-67

**Del Prato 2014**

Del Prato S, Camisasca R, Wilson C, et al. Durability of the efficacy and safety of alogliptin compared with glipizide in type 2 diabetes mellitus: a 2-year study. *Diabetes Obes Metab* 2014;**16**(12):1239-46

**DELIGHT**

Pollock C, Stefansson B, Reyner D, et al. Albuminuria-lowering effect of dapagliflozin alone and in combination with saxagliptin and effect of dapagliflozin and saxagliptin on glycaemic control in patients with type 2 diabetes and chronic kidney disease (DELIGHT): a randomised, double-blind, placebo-controlled trial. *The Lancet Diabetes & Endocrinology* 2019;**7**(6):429-41

**Deng 2017**

Deng X-L, Ma R, Zhu H-X, et al. Short article: A randomized-controlled study of sitagliptin for treating diabetes mellitus complicated by nonalcoholic fatty liver disease. *European journal of gastroenterology & hepatology* 2017;**29**(3):297-301

**DERIVE**

Fioretto P, Del Prato S, Buse JB, et al. Efficacy and safety of dapagliflozin in patients with type 2 diabetes and moderate renal impairment (chronic kidney disease stage 3A): The DERIVE Study. *Diabetes, obesity & metabolism* 2018;**20**(11):2532-40

**Derosa 2003**

Derosa G, Mugellini A, Ciccarelli L, et al. Comparison between repaglinide and glimepiride in patients with type 2 diabetes mellitus: a one-year, randomized, double-blind assessment of metabolic parameters and cardiovascular risk factors. *Clin Ther* 2003;**25**(2):472-84

**Derosa 2003a**

Derosa G, Mugellini A, Ciccarelli L, et al. Comparison of glycaemic control and cardiovascular risk profile in patients with type 2 diabetes during treatment with either repaglinide or metformin. *Diabetes Res Clin Pract* 2003;**60**(3):161-9

**Derosa 2004**

Derosa G, Franzetti I, Gadaleta G, et al. Metabolic variations with oral antidiabetic drugs in patients with Type 2 diabetes: comparison between glimepiride and metformin. *Diabetes Nutr Metab* 2004;**17**(3):143-50

**Derosa 2005**

Derosa G, Cicero AF, Gaddi AV, et al. Long-term effects of glimepiride or rosiglitazone in combination with metformin on blood pressure control in type 2 diabetic patients affected by the metabolic syndrome: a 12-month, double-blind, randomized clinical trial. *Clin Ther* 2005;**27**(9):1383-91

**Derosa 2007**

Derosa G, D'Angelo A, Fogari E, et al. Effects of nateglinide and glibenclamide on prothrombotic factors in naive type 2 diabetic patients treated with metformin: a 1-year, double-blind, randomized clinical trial. *Intern Med* 2007;**46**(22):1837-46

**Derosa 2009**

Derosa G, D'Angelo A, Salvadeo SA, et al. Modulation of adipokines and vascular remodelling markers during OGTT with acarbose or pioglitazone treatment. *Biomed Pharmacother* 2009;**63**(10):723-33

**Derosa 2009a**

Derosa G, Maffioli P, Salvadeo SA, et al. Direct comparison among oral hypoglycemic agents and their association with insulin resistance evaluated by euglycemic hyperinsulinemic clamp: the 60's study. *Metabolism* 2009;**58**(8):1059-66

**Derosa 2010**

Derosa G, Maffioli P, Salvadeo SA, et al. Effects of sitagliptin or metformin added to pioglitazone monotherapy in poorly controlled type 2 diabetes mellitus patients. *Metabolism* 2010;**59**(6):887-95

**Derosa 2010a**

Derosa G, Maffioli P, Salvadeo SA, et al. Exenatide versus glibenclamide in patients with diabetes. *Diabetes Technol Ther* 2010;**12**(3):233-40

**Derosa 2011**

Derosa G, Maffioli P, D'Angelo A, et al. Acarbose on insulin resistance after an oral fat load: a double-blind, placebo controlled study. *J Diabetes Complications* 2011;**25**(4):258-66

**Derosa 2011a**

Derosa G, Putignano P, Bossi AC, et al. Exenatide or glimepiride added to metformin on metabolic control and on insulin resistance in type 2 diabetic patients. *Eur J Pharmacol* 2011;**666**(1-3):251-6

**Derosa 2012**

Derosa G, Carbone A, D'Angelo A, et al. A randomized, double-blind, placebo-controlled trial evaluating sitagliptin action on insulin resistance parameters and beta-cell function. *Expert Opin Pharmacother* 2012;**13**(17):2433-42

**Derosa 2012a**

Derosa G, Ragonesi PD, Carbone A, et al. Vildagliptin added to metformin on beta-cell function after a euglycemic hyperinsulinemic and hyperglycemic clamp in type 2 diabetes patients. *Diabetes Technol Ther* 2012;**14**(6):475-84

**Derosa 2013**

Derosa G, Cicero AFG, Franzetti IG, et al. Effects of exenatide and metformin in combination on some adipocytokine levels: A comparison with metformin monotherapy. *Can J Physiol Pharmacol* 2013;**91**(9):724-32

**Derosa 2014**

Derosa G, Bonaventura A, Bianchi L, et al. Vildagliptin compared to glimepiride on post-prandial lipemia and on insulin resistance in type 2 diabetic patients. *Metabolism* 2014;**63**(7):957-67

**Derosa 2014a**

Derosa G, Ragonesi PD, Fogari E, et al. Sitagliptin added to previously taken antidiabetic agents on insulin resistance and lipid profile: A 2-year study evaluation. *Fundam Clin Pharmacol* 2014;**28**(2):221-29

**DIA3004**

Yale JF, Bakris G, Cariou B, et al. Efficacy and safety of canagliflozin over 52 weeks in patients with type 2 diabetes mellitus and chronic kidney disease. *Diabetes Obes Metab* 2014;**16**(10):1016-27

**Distiller 2014**

Distiller LA, Nortje H, Wellmann H, et al. A 24-week, prospective, randomized, open-label, treat-to-target pilot study of obese type 2 diabetes patients with severe insulin resistance to assess the addition of exenatide on the efficacy of U-500 regular insulin plus metformin. *Endocr Pract* 2014;**20**(11):1143-50

**DIVERSITY-CVR**

Fuchigami A, Shigiyama F, Kitazawa T, et al. Efficacy of dapagliflozin versus sitagliptin on cardiometabolic risk factors in Japanese patients with type 2 diabetes: a prospective, randomized study (DIVERSITY-CVR). *Cardiovasc Diabetol* 2020;**19**(1)

**Dobs 2013**

Dobs AS, Goldstein BJ, Aschner P, et al. Efficacy and safety of sitagliptin added to ongoing metformin and rosiglitazone combination therapy in a randomized placebo-controlled 54-week trial in patients with type 2 diabetes. *J Diabetes* 2013;**5**(1):68-79

**Dorkhan 2009**

Dorkhan M, Dencker M, Stagmo M, et al. Effect of pioglitazone versus insulin glargine on cardiac size, function, and measures of fluid retention in patients with type 2 diabetes. *Cardiovasc Diabetol* 2009;**8**:15

**Douek 2005**

Douek IF, Allen SE, Ewings P, et al. Continuing metformin when starting insulin in patients with Type 2 diabetes: a double-blind randomized placebo-controlled trial. *Diabetic Med* 2005;**22**(5):634-40

#### **Drent 2002**

Drent ML, Tollefsen AT, Heusden FH, et al. Dose-dependent efficacy of miglitol, an alpha-glucosidase inhibitor, in type 2 diabetic patients on diet alone: results of a 24-week double-blind placebo-controlled study. *Diab Nutr Metab* 2002;**15**(3):152-9

#### **DUAL I China**

Nct. A Trial Comparing Insulin Degludec/Liraglutide, Insulin Degludec, and Liraglutide in Chinese Subjects With Type 2 Diabetes Inadequately Controlled on Oral Antidiabetic Drugs (OADs). <https://clinicaltrials.gov/show/nct03172494> 2017

#### **DUAL IX**

Philis-Tsimikas A, Billings LK, Busch R, et al. Superior efficacy of insulin degludec/liraglutide versus insulin glargine U100 as add-on to sodium-glucose co-transporter-2 inhibitor therapy: a randomized clinical trial in people with uncontrolled type 2 diabetes. *Diab Obes Metab* 2019;**21**(6):1399-408

#### **DUAL VIII**

Aroda VR, Gonzalez-Galvez G, Gron R, et al. Durability of insulin degludec plus liraglutide versus insulin glargine U100 as initial injectable therapy in type 2 diabetes (DUAL VIII): a multicentre, open-label, phase 3b, randomised controlled trial. *The Lancet Diabetes & Endocrinology* 2019;**7**(8):596-605

#### **DUAL-I**

Gough SC, Bode B, Woo V, et al. Efficacy and safety of a fixed-ratio combination of insulin degludec and liraglutide (IDegLira) compared with its components given alone: results of a phase 3, open-label, randomised, 26-week, treat-to-target trial in insulin-naive patients with type 2 diabetes. *Lancet Diabetes Endocrinol* 2014;**2**(11):885-93

#### **DUAL-I JAPAN**

Kaku K, Araki E, Tanizawa Y, et al. Superior efficacy with a fixed-ratio combination of insulin degludec and liraglutide (IDegLira) compared with insulin degludec and liraglutide in insulin-naive Japanese patients with type 2 diabetes in a phase 3, open-label, randomized trial. *Diab Obes Metab* 2019;**21**:2674-83

#### **DUAL-II**

Buse JB, Vilsboll T, Thurman J, et al. Contribution of liraglutide in the fixed-ratio combination of insulin degludec and liraglutide (IDegLira). *Diabetes Care* 2014;**37**(11):2926-33

#### **DUAL-II China**

Nct. A Trial Comparing Insulin Degludec/Liraglutide and Insulin Degludec in Combination With Metformin in Chinese Subjects With Type 2 Diabetes Mellitus Inadequately Controlled With Basal Insulin Therapy and Metformin With or Without One Other Oral Antidiabetic Drug (OAD). <https://clinicaltrials.gov/show/nct03175120> 2017

#### **DUAL-III**

Linjawi S, Bode BW, Chaykin LB, et al. The efficacy of IDegLira (Insulin Degludec/Liraglutide Combination) in adults with type 2 diabetes inadequately controlled with a GLP-1 receptor agonist and oral therapy: DUAL III randomized clinical trial. *Diabetes Ther* 2017;**8**(1):101-14

#### **DUET-beta study**

Kondo Y, Satoh S, Terauchi Y. Effects of dulaglutide and trelagliptin on beta-cell function in patients with type 2 diabetes-the duet-beta study. *Diabetes* 2018;**67**:A286-A87

#### **DURATION-2**

Bergental RM, Wysham C, Macconell L, et al. Efficacy and safety of exenatide once weekly versus sitagliptin or pioglitazone as an adjunct to metformin for treatment of type 2 diabetes (DURATION-2): a randomised trial. *Lancet* 2010;**376**(9739):431-9

#### **DURATION-3**

Diamant M, Gaal L, Stranks S, et al. Once weekly exenatide compared with insulin glargine titrated to target in patients with type 2 diabetes (DURATION-3): an open-label randomised trial. *Lancet* 2010;**375**(9733):2234-43

#### **DURATION-4**

Russell-Jones D, Cuddihy RM, Hanefeld M, et al. Efficacy and safety of exenatide once weekly versus metformin, pioglitazone, and sitagliptin used as monotherapy in drug-naive patients with type 2 diabetes (DURATION-4): a 26-week double-blind study. *Diabetes Care* 2012;**35**(2):252-8

#### **DURATION-7**

Guja C, Frías JP, Somogyi A, et al. Effect of exenatide QW or placebo, both added to titrated insulin glargine, in uncontrolled type 2 diabetes: the DURATION-7 randomized study. *Diab Obes Metab* 2018;**20**(7):1602-14

#### **DURATION-8**

Frias JP, Guja C, Hardy E, et al. Exenatide once weekly plus dapagliflozin once daily versus exenatide or dapagliflozin alone in patients with type 2 diabetes inadequately controlled with metformin monotherapy (DURATION-8): a 28 week, multicentre, double-blind, phase 3, randomised controlled trial. *Lancet Diabetes Endocrinol* 2016;**4**(12):1004-16

#### **DURATION-8 study**

Jabbour SA, Frias JP, Hardy E, et al. Safety and Efficacy of Exenatide Once Weekly Plus Dapagliflozin Once Daily Versus Exenatide or Dapagliflozin Alone in Patients With Type 2 Diabetes Inadequately Controlled With Metformin Monotherapy: 52-Week Results of the DURATION-8 Randomized Controlled Trial. *Diabetes care* 2018;**41**(10):2136-46

#### **DURATION-NEO-2**

Gadde KM, Vetter ML, Iqbal N, et al. Efficacy and safety of autoinjected exenatide once-weekly suspension versus sitagliptin or placebo with metformin in patients with type 2 diabetes: The DURATION-NEO-2 randomized clinical study. *Diabetes Obes Metab* 2017;**19**(7):979-88

#### **EAGLE**

D'Alessio D, Haring HU, Charbonnel B, et al. Comparison of insulin glargine and liraglutide added to oral agents in patients with poorly controlled type 2 diabetes. *Diabetes Obes Metab* 2015;**17**(2):170-78

**EASIE**

Aschner P, Chan J, Owens DR, et al. Insulin glargine versus sitagliptin in insulin-naive patients with type 2 diabetes mellitus uncontrolled on metformin (EASIE): a multicentre, randomised open-label trial. *Lancet* 2012;**379**(9833):2262-9

**Ebato 2009**

Ebato C, Shimizu T, Arakawa M, et al. Effect of sulfonylureas on switching to insulin therapy (twice-daily biphasic insulin aspart 30): comparison of twice-daily biphasic insulin aspart 30 with or without glimepiride in type 2 diabetic patients poorly controlled with sub-maximal glimepiride. *Diabetes Res Clin Pract* 2009;**86**(1):31-6

**EDIT**

Sato S, Saisho Y, Kou K, et al. Efficacy and safety of sitagliptin added to insulin in Japanese patients with type 2 Diabetes: The EDIT randomized trial. *PLoS ONE* 2015;**10**(3)

**Efstathiou 2015**

Efstathiou S, Skeva I, Mountokalakis T. Dapagliflozin may attenuate adipose tissue inflammation and arterial stiffness in type 2 diabetes. *Diabetes* 2015;**64**:A322

**ELEGANT**

de Wit HM, Vervoort GM, Jansen HJ, et al. Liraglutide reverses pronounced insulin-associated weight gain, improves glycaemic control and decreases insulin dose in patients with type 2 diabetes: a 26 week, randomised clinical trial (ELEGANT). *Diabetologia* 2014;**57**(9):1812-9

**ELIXA**

Pfeffer MA, Claggett B, Diaz R, et al. Lixisenatide in patients with type 2 diabetes and acute coronary syndrome. *N Engl J Med* 2015;**373**(23):2247-57

**ELLENA-IT**

Nakaguchi H, Kondo Y, Kyohara M, et al. Effects of liraglutide and empagliflozin added to insulin therapy in patients with type 2 diabetes: a randomized controlled study ELLENA-IT study. *J Diabetes Invest* 2020

**EMBLEM**

Tanaka A, Shimabukuro M, Machii N, et al. Effect of empagliflozin on endothelial function in patients with type 2 diabetes and cardiovascular disease: results from the multicenter, randomized, placebo- controlled, double-blind EMBLEM trial. *Diabetes Care* 2019;**42**(10):E159-E61

**EMIT**

Kashiwagi A, Akiyama N, Shiga T, et al. Efficacy and safety of ipragliflozin as an add-on to a sulfonylurea in Japanese patients with inadequately controlled type 2 diabetes: results of the randomized, placebo-controlled, double-blind, phase III EMIT study. *Diabetol Int* 2015;**6**(2):125-38

**EMLIFA001**

Kahl S, Gancheva S, Strassburger K, et al. Empagliflozin effectively lowers liver fat content in well-controlled type 2 diabetes: A randomized, double-blind, phase 4, placebo-controlled trial. *Diabetes Care* 2019

**EMPA-HEART CardioLink-6**

Verma S, Mazer CD, Yan AT, et al. Effect of empagliflozin on left ventricular mass in patients with type 2 diabetes and coronary artery disease: the EMPA-HEART CardioLink-6 randomized clinical trial. *Circulation* 2019

#### **EMPA-REG BASAL**

Rosenstock J, Jelaska A, Zeller C, et al. Impact of empagliflozin added on to basal insulin in type 2 diabetes inadequately controlled on basal insulin: a 78-week randomized, double-blind, placebo-controlled trial. *Diabetes Obes Metab* 2015;**17**(10):936-48

#### **EMPA-REG H2H-SU**

Ridderstrale M, Andersen KR, Zeller C, et al. Comparison of empagliflozin and glimepiride as add-on to metformin in patients with type 2 diabetes: A 104-week randomised, active-controlled, double-blind, phase 3 trial. *Lancet Diabetes Endocrinol* 2014;**2**(9):691-700

#### **EMPA-REG MDI**

Rosenstock J, Jelaska A, Frappin G, et al. Improved glucose control with weight loss, lower insulin doses, and no increased hypoglycemia with empagliflozin added to titrated multiple daily injections of insulin in obese inadequately controlled type 2 diabetes. *Diabetes Care* 2014;**37**(7):1815-23

#### **EMPA-REG MET**

Haring HU, Merker L, Seewaldt-Becker E, et al. Empagliflozin as add-on to metformin in patients with type 2 diabetes: A 24-week, randomized, double-blind, placebo-controlled trial. *Diabetes Care* 2014;**37**(6):1650-59

#### **EMPA-REG METSU**

Haring HU, Merker L, Seewaldt-Becker E, et al. Empagliflozin as add-on to metformin plus sulfonylurea in patients with type 2 diabetes: A 24-week, randomized, double-blind, placebo-controlled trial. *Diabetes Care* 2013;**36**(11):3396-404

#### **EMPA-REG MONO**

Roden M, Weng J, Eilbracht J, et al. Empagliflozin monotherapy with sitagliptin as an active comparator in patients with type 2 diabetes: A randomised, double-blind, placebo-controlled, phase 3 trial. *Lancet Diabetes Endocrinol* 2013;**1**(3):208-19

#### **EMPA-REG OUTCOME**

Zinman B, Wanner C, Lachin JM, et al. Empagliflozin, cardiovascular outcomes, and mortality in type 2 diabetes. *N Engl J Med* 2015;**373**:2117-28

#### **EMPA-REG PIO**

Kovacs CS, Seshiah V, Swallow R, et al. Empagliflozin improves glycaemic and weight control as add-on therapy to pioglitazone or pioglitazone plus metformin in patients with type 2 diabetes: A 24-week, randomized, placebo-controlled trial. *Diabetes Obes Metab* 2014;**16**(2):147-58

#### **EMPA-REG RENAL**

Barnett AH, Mithal A, Manassie J, et al. Efficacy and safety of empagliflozin added to existing antidiabetes treatment in patients with type 2 diabetes and chronic kidney disease: A randomised, double-blind, placebo-controlled trial. *Lancet Diabetes Endocrinol* 2014;**2**(5):369-84

#### **Engelbrechtsen 2016**

Engelbrechtsen L, Iepsen EPW, Andersson EA, et al. Weight loss and weight maintenance obtained with or without GLP-1 analogue treatment decrease branched chain amino acid levels. *Metabolomics* 2016;**12**(12):181

#### **Erem 2014**

Erem C, Ozbas HM, Nuhoglu I, et al. Comparison of effects of gliclazide, metformin and pioglitazone monotherapies on glycemic control and cardiovascular risk factors in patients with newly diagnosed uncontrolled type 2 diabetes mellitus. *Exp Clin Endocrinol Diabetes* 2014;**122**(5):295-302

#### **ESPECIAL-ACS study**

Kuramitsu S, Miyauchi K, Yokoi H, et al. Effect of sitagliptin on plaque changes in coronary artery following acute coronary syndrome in diabetic patients: the ESPECIAL-ACS study. *Journal of cardiology* 2017;**69**(1):369-76

#### **Esposito 2004**

Esposito K, Giugliano D, Nappo F, et al. Regression of carotid atherosclerosis by control of postprandial hyperglycemia in type 2 diabetes mellitus. *Circulation* 2004;**110**(2):214-9

#### **Esposito 2011**

Esposito K, Maiorino MI, Di Palo C, et al. Effects of pioglitazone versus metformin on circulating endothelial microparticles and progenitor cells in patients with newly diagnosed type 2 diabetes-a randomized controlled trial. *Diabetes Obes Metab* 2011;**13**(5):439-45

#### **Essen Study**

Hoffmann J, Spengler M. Efficacy of 24-week monotherapy with acarbose, glibenclamide, or placebo in NIDDM patients. *The Essen Study. Diabetes Care* 1994;**17**(6):561-6

#### **EUREXA**

Gallwitz B, Guzman J, Dotta F, et al. Exenatide twice daily versus glimepiride for prevention of glycaemic deterioration in patients with type 2 diabetes with metformin failure (EUREXA): an open-label, randomised controlled trial. *Lancet* 2012;**379**(9833):2270-8

#### **EUREXA extension**

Schernthaner G, Rosas-Guzman J, Dotta F, et al. Treatment escalation options for patients with type 2 diabetes after failure of exenatide twice daily or glimepiride added to metformin: Results from the prospective European Exenatide (EUREXA) study. *Diabetes Obes Metab* 2015;**17**(7):689-98

#### **EXAMINE**

White WB, Cannon CP, Heller SR, et al. Alogliptin after acute coronary syndrome in patients with type 2 diabetes. *N Engl J Med* 2013;**369**(14):1327-35

#### **Exenatide-113**

Buse JB, Henry RR, Han J, et al. Effects of exenatide (Exendin-4) on glycemic control over 30 weeks in sulfonylurea-treated patients with type 2 diabetes. *Diabetes Care* 2004;**27**(11):2628-35

#### **EXSCEL**

Holman RR, Bethel MA, Mentz RJ, et al. Effects of Once-Weekly Exenatide on Cardiovascular Outcomes in Type 2 Diabetes. *New England journal of medicine* 2017;**377**(13):1228-39



**Feng 2017**

Feng WH, Bi Y, Li P, et al. Effects of liraglutide, metformin and gliclazide on body composition in patients with both type 2 diabetes and non-alcoholic fatty liver disease: A randomized trial. *Journal of Diabetes Investigation* 2019;**10**(2):399-407

**Ferdinand 2019**

Ferdinand KC, Izzo JL, Lee J, et al. Antihyperglycemic and Blood Pressure Effects of Empagliflozin in Black Patients With Type 2 Diabetes Mellitus and Hypertension. *Circulation* 2019;**139**(18):2098-109

**Fernandez 2008**

Fernandez M, Triplitt C, Wajsborg E, et al. Addition of pioglitazone and ramipril to intensive insulin therapy in type 2 diabetic patients improves vascular dysfunction by different mechanisms. *Diabetes Care* 2008;**31**(1):121-7

**Ferrannini 2010**

Ferrannini E, Ramos SJ, Salsali A, et al. Dapagliflozin monotherapy in type 2 diabetic patients with inadequate glycemic control by diet and exercise: a randomized, double-blind, placebo-controlled, phase 3 trial. *Diabetes Care* 2010;**33**(10):2217-24

**FIGHT**

Sharma A, Ambrosy AP, DeVore AD, et al. Liraglutide and weight loss among patients with advanced heart failure and a reduced ejection fraction: insights from the FIGHT trial. *ESC heart failure* 2018;**5**(6):1035-43

**Filozof 2010**

Filozof C, Gautier JF. A comparison of efficacy and safety of vildagliptin and gliclazide in combination with metformin in patients with Type 2 diabetes inadequately controlled with metformin alone: a 52-week, randomized study. *Diabetic Med* 2010;**27**(3):318-26

**Finn 2009**

Finn AV, Oh JS, Hendricks M, et al. Predictive factors for in-stent late loss and coronary lesion progression in patients with type 2 diabetes mellitus randomized to rosiglitazone or placebo. *Am Heart J* 2009;**157**(2):383.e1-8

**Fischer 1998**

Fischer S, Hanefeld M, Spengler M, et al. European study on dose-response relationship of acarbose as a first-line drug in non-insulin-dependent diabetes mellitus: efficacy and safety of low and high doses. *Acta Diabetologica* 1998;**35**(1):34-40

**Foley 2009**

Foley JE, Sreenan S. Efficacy and safety comparison between the DPP-4 inhibitor vildagliptin and the sulfonylurea gliclazide after two years of monotherapy in drug-naïve patients with type 2 diabetes. *Horm Metab Res* 2009;**41**(12):905-9

**Foley 2011**

Foley JE, Bunck MC, Möller-Goede DL, et al. Beta cell function following 1 year vildagliptin or placebo treatment and after 12 week washout in drug-naïve patients with type 2 diabetes and mild hyperglycaemia: a randomised controlled trial. *Diabetologia* 2011;**54**(8):1985-91

**Fonseca 2000**

Fonseca V, Rosenstock J, Patwardhan R, et al. Effect of metformin and rosiglitazone combination therapy in patients with type 2 diabetes mellitus: a randomized controlled trial. *JAMA* 2000;**283**(13):1695-702

**Fonseca 2003**

Fonseca V, Grunberger G, Gupta S, et al. Addition of nateglinide to rosiglitazone monotherapy suppresses mealtime hyperglycemia and improves overall glycemic control. *Diabetes Care* 2003;**26**(6):1685-90

**Fonseca 2007**

Fonseca V, Schweizer A, Albrecht D, et al. Addition of vildagliptin to insulin improves glycaemic control in type 2 diabetes. *Diabetologia* 2007;**50**(6):1148-55

**Fonseca 2013**

Fonseca V, Staels B, Morgan JD, et al. Efficacy and safety of sitagliptin added to ongoing metformin and pioglitazone combination therapy in a randomized, placebo-controlled, 26-week trial in patients with type 2 diabetes. *J Diabetes Complications* 2013;**27**(2):177-83

**Forst 2003**

Forst T, Eriksson JW, Strotmann HJ, et al. Metabolic effects of mealtime insulin lispro in comparison to glibenclamide in early type 2 diabetes. *Exp Clin Endocrinol Diabetes* 2003;**111**(2):97-103

**Forst 2005**

Forst T, Hohberg C, Fuellert SD, et al. Pharmacological PPARgamma stimulation in contrast to beta cell stimulation results in an improvement in adiponectin and proinsulin intact levels and reduces intima media thickness in patients with type 2 diabetes. *Horm Metab Res* 2005;**37**(8):521-7

**Forst 2013**

Forst T, Dworak M, Berndt-Zipfel C, et al. Effect of vildagliptin compared to glimepiride on postprandial proinsulin processing in the beta cell of patients with type 2 diabetes mellitus. *Diabetes, Obesity and Metabolism* 2013;**15**(6):576-79

**Forst 2014**

Forst T, Guthrie R, Goldenberg R, et al. Efficacy and safety of canagliflozin over 52 weeks in patients with type 2 diabetes on background metformin and pioglitazone. *Diabetes Obes Metab* 2014;**16**(5):467-77

**Forst 2015**

Forst T, Koch C, Dworak M. Vildagliptin versus insulin in patients with type 2 diabetes mellitus inadequately controlled with sulfonylurea: Results from a randomized, 24 week study. *Curr Med Res Opin* 2015;**31**(6):1079-84

**Frederich 2012**

Frederich R, McNeill R, Berglind N, et al. The efficacy and safety of the dipeptidyl peptidase-4 inhibitor saxagliptin in treatment-naive patients with type 2 diabetes mellitus: A randomized controlled trial. *Diabetol Metab Syndr* 2012;**4**(1)

**FREEDOM-1**

Rosenstock J, Buse JB, Azeem R, et al. Efficacy and safety of ITCA 650, a novel drug-Device GLP-1 receptor agonist, in type 2 diabetes uncontrolled with oral antidiabetes drugs: The FREEDOM-1 trial. *Diabetes Care* 2018;**41**(2):333-40

**Frias 2018**

Frias JP, Nauck MA, Van J, et al. Efficacy and safety of LY3298176, a novel dual GIP and GLP-1 receptor agonist, in patients with type 2 diabetes: a randomised, placebo-controlled and active comparator-controlled phase 2 trial. *Lancet* 2018;**392**(10160):2180-93

**Gaal 2001**

Gaal L, Maislos M, Scherthner G, et al. Miglitol combined with metformin improves glycaemic control in type 2 diabetes. *Diabetes Obes Metab* 2001;**3**(5):326-31

**Gallwitz 2011**

Gallwitz B, Böhmer M, Segiet T, et al. Exenatide twice daily versus premixed insulin aspart 70/30 in metformin-treated patients with type 2 diabetes: a randomized 26-week study on glycemic control and hypoglycemia. *Diabetes Care* 2011;**34**(3):604-6

**Gallwitz 2012**

Gallwitz B, Rosenstock J, Rauch T, et al. 2-year efficacy and safety of linagliptin compared with glimepiride in patients with type 2 diabetes inadequately controlled on metformin: a randomised, double-blind, non-inferiority trial. *Lancet* 2012;**380**(9840):475-83

**Gantz 2017**

Gantz I, Chen M, Suryawanshi S, et al. A randomized, placebo-controlled study of the cardiovascular safety of the once-weekly DPP-4 inhibitor omarigliptin in patients with type 2 diabetes mellitus. *Cardiovasc Diabetol* 2017;**16**(1):112

**Gantz 2017b**

Gantz I, Sokolova L, Jain L, et al. Use of prohibited medication, a potentially overlooked confounder in clinical trials: Omarigliptin (once-weekly DPP-4 inhibitor) monotherapy trial in 18- to 45-year-olds. *Clin Ther* 2017;**39**(10):2024-37

**Garber 2006**

Garber A, Klein E, Bruce S, et al. Metformin-glibenclamide versus metformin plus rosiglitazone in patients with type 2 diabetes inadequately controlled on metformin monotherapy. *Diabetes Obes Metab* 2006;**8**(2):156-63

**Garber 2007**

Garber AJ, Schweizer A, Baron MA, et al. Vildagliptin in combination with pioglitazone improves glycaemic control in patients with type 2 diabetes failing thiazolidinedione monotherapy: a randomized, placebo-controlled study. *Diabetes Obes Metab* 2007;**9**(2):166-74

**Garber 2008**

Garber AJ, Foley JE, Banerji MA, et al. Effects of vildagliptin on glucose control in patients with type 2 diabetes inadequately controlled with a sulphonylurea. *Diabetes Obes Metab* 2008;**10**(11):1047-56

**Gastaldelli 2014**

Gastaldelli A, Brodows RG, D'Alessio D. The effect of chronic twice daily exenatide treatment on beta-cell function in new onset type 2 diabetes. *Clin Endocrinol* 2014;**80**(4):545-53

## **GENERATION**

Schernthaner G, Duran-Garcia S, Hanefeld M, et al. Efficacy and tolerability of saxagliptin compared with glimepiride in elderly patients with type 2 diabetes: A randomized, controlled study (GENERATION). *Diabetes Obes Metab* 2015;**17**(7):630-38

## **Gentile 2001**

Gentile S, Turco S, Guarino G, et al. Effect of treatment with acarbose and insulin in patients with non-insulin-dependent diabetes mellitus associated with non-alcoholic liver cirrhosis. *Diabetes Obes Metab* 2001;**3**(1):33-40

## **GetGoal Duo-2**

Rosenstock J, Guerci B, Hanefeld M, et al. Prandial options to advance basal insulin glargine therapy: Testing lixisenatide plus basal insulin versus insulin glulisine either as basal-plus or basal-bolus in type 2 diabetes: The GetGoal Duo-2 Trial. *Diabetes Care* 2016;**39**(8):1318-28

## **GetGoal-Duo-1**

Riddle MC, Forst T, Aronson R, et al. Adding once-daily lixisenatide for type 2 diabetes inadequately controlled with newly initiated and continuously titrated basal insulin glargine: a 24-week, randomized, placebo-controlled study (GetGoal-Duo 1). *Diabetes Care* 2013;**36**(9):2497-503

## **GetGoal-F1**

Bolli GB, Munteanu M, Dotsenko S, et al. Efficacy and safety of lixisenatide once daily vs. placebo in people with Type 2 diabetes insufficiently controlled on metformin (GetGoal-F1). *Diabetic Med* 2014;**31**(2):176-84

## **GetGoal-L**

Riddle MC, Aronson R, Home P, et al. Adding once-daily lixisenatide for type 2 diabetes inadequately controlled by established basal insulin: a 24-week, randomized, placebo-controlled comparison (GetGoal-L). *Diabetes Care* 2013;**36**(9):2489-96

## **GetGoal-L-Asia**

Seino Y, Min KW, Niemoeller E, et al. Randomized, double-blind, placebo-controlled trial of the once-daily GLP-1 receptor agonist lixisenatide in Asian patients with type 2 diabetes insufficiently controlled on basal insulin with or without a sulfonylurea (GetGoal-L-Asia). *Diabetes Obes Metab* 2012;**14**(10):910-7

## **GetGoal-L-C**

Yang W, Min K, Zhou Z, et al. Efficacy and safety of lixisenatide in a predominantly Asian population with type 2 diabetes insufficiently controlled with basal insulin: the GetGoal-L-C randomized trial. *Diabetes, obesity & metabolism* 2018;**20**(2):335-43

## **GetGoal-M**

Ahrén B, Leguizamo Dimas A, Miossec P, et al. Efficacy and safety of lixisenatide once-daily morning or evening injections in type 2 diabetes inadequately controlled on metformin (GetGoal-M). *Diabetes Care* 2013;**36**(9):2543-50

## **GetGoal-M-Asia**

Yu Pan C, Han P, Liu X, et al. Lixisenatide treatment improves glycaemic control in Asian patients with type 2 diabetes mellitus inadequately controlled on metformin with or without sulfonylurea:

a randomized, double-blind, placebo-controlled, 24-week trial (GetGoal-M-Asia). *Diabetes Metab Res Rev* 2014;**30**(8):726-35

#### **GetGoal-O**

Meneilly GS, Roy-Duval C, Alawi H, et al. Lixisenatide therapy in older patients with type 2 diabetes inadequately controlled on their current antidiabetic treatment: The GetGoal-O randomized trial. *Diabetes Care* 2017;**40**(4):485-93

#### **GetGoal-P**

Pinget M, Goldenberg R, Niemoeller E, et al. Efficacy and safety of lixisenatide once daily versus placebo in type 2 diabetes insufficiently controlled on pioglitazone (GetGoal-P). *Diabetes Obes Metab* 2013;**15**(11):1000-07

#### **GetGoal-S**

Rosenstock J, Hanefeld M, Shamanna P, et al. Beneficial effects of once-daily lixisenatide on overall and postprandial glycemic levels without significant excess of hypoglycemia in Type 2 diabetes inadequately controlled on a sulfonylurea with or without metformin (GetGoal-S). *J Diabetes Complications* 2014;**28**(3):386-92

#### **Giles 2008**

Giles TD, Miller AB, Elkayam U, et al. Pioglitazone and heart failure: results from a controlled study in patients with type 2 diabetes mellitus and systolic dysfunction. *J Card Fail* 2008;**14**(6):445-52

#### **Giugliano 1993**

Giugliano D, Quattraro A, Consoli G, et al. Metformin for obese, insulin-treated diabetic patients: improvement in glycaemic control and reduction of metabolic risk factors. *Eur J Clin Pharmacol* 1993;**44**(2):107-12

#### **GLAC**

Tan MH, Johns D, Strand J, et al. Sustained effects of pioglitazone vs. glibenclamide on insulin sensitivity, glycaemic control, and lipid profiles in patients with Type 2 diabetes. *Diabet Med* 2004;**21**(8):859-66

#### **GLAD**

Tan M, Johns D, González Gálvez G, et al. Effects of pioglitazone and glimepiride on glycemic control and insulin sensitivity in Mexican patients with type 2 diabetes mellitus: A multicenter, randomized, double-blind, parallel-group trial. *Clin Ther* 2004;**26**(5):680-93

#### **GLAL**

Tan MH, Baksi A, Krahulec B, et al. Comparison of pioglitazone and gliclazide in sustaining glycemic control over 2 years in patients with type 2 diabetes. *Diabetes Care* 2005;**28**(3):544-50

#### **Glimepiride Combination Group study 1998**

Riddle MC, Schneider J. Beginning insulin treatment of obese patients with evening 70/30 insulin plus glimepiride versus insulin alone. Glimepiride Combination Group. *Diabetes Care* 1998;**21**(7):1052-7

#### **Göke 2002**

Göke B. Improved glycemic control and lipid profile in a randomized study of pioglitazone compared with acarbose in patients with type 2 diabetes mellitus. *Treat Endocrinol* 2002;**1**(5):329-36

**Göke 2010**

Göke B, Gallwitz B, Eriksson J, et al. Saxagliptin is non-inferior to glipizide in patients with type 2 diabetes mellitus inadequately controlled on metformin alone: a 52-week randomised controlled trial. *Int J Clin Pract* 2010;**64**(12):1619-31

**Gómez-Perez 2002**

Gómez-Perez FJ, Fanghänel-Salmón G, Antonio Barbosa J, et al. Efficacy and safety of rosiglitazone plus metformin in Mexicans with type 2 diabetes. *Diabetes Metab Res Rev* 2002;**18**(2):127-34

**Gomis 2011**

Gomis R, Espadero RM, Jones R, et al. Efficacy and safety of initial combination therapy with linagliptin and pioglitazone in patients with inadequately controlled type 2 diabetes: a randomized, double-blind, placebo-controlled study. *Diabetes Obes Metab* 2011;**13**(7):653-61

**Goodman 2009**

Goodman M, Thurston H, Penman J. Efficacy and tolerability of vildagliptin in patients with type 2 diabetes inadequately controlled with metformin monotherapy. *Horm Metab Res* 2009;**41**(5):368-73

**Grant 1996**

Grant PJ. The effects of high- and medium-dose metformin therapy on cardiovascular risk factors in patients with type II diabetes. *Diabetes Care* 1996;**19**(1):64-6

**GRAVITAS**

Miras AD, Perez-Pevida B, Aldhwayan M, et al. Adjunctive liraglutide treatment in patients with persistent or recurrent type 2 diabetes after metabolic surgery (GRAVITAS): a randomised, double-blind, placebo-controlled trial. *The Lancet Diabetes & Endocrinology* 2019;**7**(7):549-59

**Grey 2014**

Grey A, Bolland M, Fenwick S, et al. The skeletal effects of pioglitazone in type 2 diabetes or impaired glucose tolerance: A randomized controlled trial. *Eur J Endocrinol* 2014;**170**(2):255-62

**Gudipaty 2014**

Gudipaty L, Rosenfeld NK, Fuller CS, et al. Effect of exenatide, sitagliptin, or glimepiride on beta-cell secretory capacity in early type 2 diabetes. *Diabetes Care* 2014;**37**(9):2451-58

**Gurkan 2014**

Gurkan E, Tarkun I, Sahin T, et al. Evaluation of exenatide versus insulin glargine for the impact on endothelial functions and cardiovascular risk markers. *Diabetes Res Clin Pract* 2014;**106**(3):567-75

**Gutniak 1987**

Gutniak M, Karlander SG, Efendi S. Glyburide decreases insulin requirement, increases beta-cell response to mixed meal, and does not affect insulin sensitivity: effects of short- and long-term combined treatment in secondary failure to sulfonylurea. *Diabetes Care* 1987;**10**(5):545-54

**Güvener 1999**

Güvener N, Gedik O. Effects of combination of insulin and acarbose compared with insulin and gliclazide in type 2 diabetic patients. *Acta Diabetol* 1999;**36**(1-2):93-7

**Guzman 2017**

Guzman CB, Zhang XM, Liu R, et al. Treatment with LY2409021, a glucagon receptor antagonist, increases liver fat in patients with type 2 diabetes. *Diabetes Obes Metab* 2017;**19**(11):1521-28

**Haak 2012**

Haak T, Meinicke T, Jones R, et al. Initial combination of linagliptin and metformin improves glycaemic control in type 2 diabetes: a randomized, double-blind, placebo-controlled study. *Diabetes Obes Metab* 2012;**14**(6):565-74

**Hadjadj 2016**

Hadjadj S, Rosenstock J, Meinicke T, et al. Initial combination of empagliflozin and metformin in patients with type 2 diabetes. *Diabetes Care* 2016;**39**(10):1718-28

**Halimi 2000**

Halimi S, Berre MA, Grangé V. Efficacy and safety of acarbose add-on therapy in the treatment of overweight patients with Type 2 diabetes inadequately controlled with metformin: a double-blind, placebo-controlled study. *Diabetes Res Clin Pract* 2000;**50**(1):49-56

**Hällsten 2002**

Hällsten K, Virtanen KA, Lönnqvist F, et al. Rosiglitazone but not metformin enhances insulin- and exercise-stimulated skeletal muscle glucose uptake in patients with newly diagnosed type 2 diabetes. *Diabetes* 2002;**51**(12):3479-85

**Halvorsen 2019**

Halvorsen YDC, Walford GA, Massaro J, et al. A 96-week, multinational, randomized, double-blind, parallel-group, clinical trial evaluating the safety and effectiveness of bexagliflozin as a monotherapy for adults with type 2 diabetes. *Diabetes, Obesity and Metabolism* 2019

**Halvorsen 2019a**

Halvorsen Y-D, Lock JP, Zhou W, et al. A 24-week, randomized, double-blind, active-controlled clinical trial comparing bexagliflozin with sitagliptin as an adjunct to metformin for the treatment of type 2 diabetes in adults. *Diab Obes Metab* 2019;**21**(10):2248-56

**Han 2016**

Han KA, Yu JM, Jang HC, et al. Efficacy and safety of gemigliptin as add-on therapy in patients with type 2 diabetes inadequately controlled on metformin and glimepiride. *Diabetes* 2016;**65**(Supplement 1):A307

**Han 2018**

Han KA, Chon S, Chung CH, et al. Efficacy and safety of ipragliflozin as an add-on therapy to sitagliptin and metformin in Korean patients with inadequately controlled type 2 diabetes mellitus: a randomized controlled trial. *Diabetes, obesity & metabolism* 2018;**20**(10):2408-15

**Handelsman 2017**

Handelsman Y, Lauring B, Gantz I, et al. A randomized, double-blind, non-inferiority trial evaluating the efficacy and safety of omarigliptin, a once-weekly DPP-4 inhibitor, or glimepiride in

patients with type 2 diabetes inadequately controlled on metformin monotherapy. *Curr Med Res Opin* 2017;1-8

**Handelsman 2019**

Handelsman Y, Mathieu C, Del Prato S, et al. Sustained 52-week efficacy and safety of triple therapy with dapagliflozin plus saxagliptin versus dual therapy with sitagliptin added to metformin in patients with uncontrolled type 2 diabetes. *Diabetes, Obesity and Metabolism* 2019;**21**(4):883-92

**Haneda 2016**

Haneda M, Seino Y, Inagaki N, et al. Influence of renal function on the 52-week efficacy and safety of the sodium glucose cotransporter 2 inhibitor luseogliflozin in Japanese patients with type 2 diabetes mellitus. *Clin Ther* 2016;**38**(1):88e66-88e120

**Hanefeld 1991**

Hanefeld M, Fischer S, Schulze J, et al. Therapeutic potentials of acarbose as first-line drug in NIDDM insufficiently treated with diet alone. *Diabetes Care* 1991;**14**(8):732-7

**Hanefeld 2004**

Hanefeld M, Brunetti P, Schernthaner GH, et al. One-year glycemetic control with a sulfonylurea plus pioglitazone versus a sulfonylurea plus metformin in patients with type 2 diabetes. *Diabetes Care* 2004;**27**(1):141-7

**Hanefeld 2007**

Hanefeld M, Patwardhan R, Jones NP. A one-year study comparing the efficacy and safety of rosiglitazone and glibenclamide in the treatment of type 2 diabetes. *Nutr Metab Cardiovasc Dis* 2007;**17**(1):13-23

**HARMONY 1**

Reusch J, Stewart MW, Perkins CM, et al. Efficacy and safety of once-weekly glucagon-like peptide 1 receptor agonist albiglutide (HARMONY 1 trial): 52-week primary endpoint results from a randomized, double-blind, placebo-controlled trial in patients with type 2 diabetes mellitus not controlled on pioglitazone, with or without metformin. *Diabetes Obes Metab* 2014;**16**(12):1257-64

**HARMONY 2**

Nauck MA, Stewart MW, Perkins C, et al. Efficacy and safety of once-weekly GLP-1 receptor agonist albiglutide (HARMONY 2): 52 week primary endpoint results from a randomised, placebo-controlled trial in patients with type 2 diabetes mellitus inadequately controlled with diet and exercise. *Diabetologia* 2016;**59**(2):266-74

**HARMONY 3**

Ahren B, Johnson SL, Stewart M, et al. HARMONY 3: 104-week randomized, double-blind, placebo- and active-controlled trial assessing the efficacy and safety of albiglutide compared with placebo, sitagliptin, and glimepiride in patients with type 2 diabetes taking metformin. *Diabetes Care* 2014;**37**(8):2141-8

**HARMONY 4**

Weissman PN, Carr MC, Ye J, et al. HARMONY 4: randomised clinical trial comparing once-weekly albiglutide and insulin glargine in patients with type 2 diabetes inadequately controlled with metformin with or without sulfonylurea. *Diabetologia* 2014;**57**(12):2475-84



**HARMONY 5**

Home PD, Shamanna P, Stewart M, et al. Efficacy and tolerability of albiglutide versus placebo or pioglitazone over 1 year in people with type 2 diabetes currently taking metformin and glimepiride: HARMONY 5. *Diabetes Obes Metab* 2015;**17**(2):179-87

**HARMONY 6**

Rosenstock J, Fonseca VA, Gross JL, et al. Advancing basal insulin replacement in type 2 diabetes inadequately controlled with insulin glargine plus oral agents: A comparison of adding albiglutide, a weekly GLP-1 receptor agonist, versus thrice-daily prandial insulin lispro. *Diabetes Care* 2014;**37**(8):2317-25

**HARMONY OUTCOMES**

Hernandez AF, Green JB, Janmohamed S, et al. Albiglutide and cardiovascular outcomes in patients with type 2 diabetes and cardiovascular disease (Harmony Outcomes): a double-blind, randomised placebo-controlled trial. *Lancet (London, England)* 2018;**392**(10157):1519-29

**Hartemann-Heurtier 2009**

Hartemann-Heurtier A, Halbron M, Golmard JL, et al. Effects of bed-time insulin versus pioglitazone on abdominal fat accumulation, inflammation and gene expression in adipose tissue in patients with type 2 diabetes. *Diabetes Res Clin Pract* 2009;**86**(1):37-43

**Hartley 2015**

Hartley P, Shentu Y, Betz-Schiff P, et al. Efficacy and tolerability of sitagliptin compared with glimepiride in elderly patients with type 2 diabetes mellitus and inadequate glycemic control: a randomized, double-blind, non-inferiority trial. *Drugs and Aging* 2015;**32**(6):469-76

**Hasche 1999**

Hasche H, Mertes G, Bruns C, et al. Effects of acarbose treatment in Type 2 diabetic patients under dietary training: a multicentre, double-blind, placebo-controlled, 2-year study. *Diabetes Nutr Metab* 1999;**12**(4):277-85

**Hattori 2017**

Hattori A, Takemoto M, Tokuyama H, et al. Sitagliptin but not alpha glucosidase inhibitor reduced the serum soluble CD163, a marker for activated macrophage, in individuals with type 2 diabetes mellitus. *Diabetes Res Clin Pract* 2017;**126**:138-43

**Hattori 2018**

Hattori S. Anti-inflammatory effects of empagliflozin in patients with type 2 diabetes and insulin resistance. *Diabetology & metabolic syndrome* 2018;**10**:93

**HEELA study**

Davies MJ, Donnelly R, Barnett AH, et al. Exenatide compared with long-acting insulin to achieve glycaemic control with minimal weight gain in patients with type 2 diabetes: results of the Helping Evaluate Exenatide in patients with diabetes compared with Long-Acting insulin (HEELA) study. *Diabetes Obes Metab* 2009;**11**(12):1153-62

**Hegele 1995**

Hegele RA, Connelly PW, Palmason C, et al. Differential response of plasma lipoprotein(a) and apolipoprotein B in NIDDM subjects treated with acarbose. *Diabetes Care* 1995;**18**(2):272-3

**Heine 2005**

Heine RJ, Gaal LF, Johns D, et al. Exenatide versus insulin glargine in patients with suboptimally controlled type 2 diabetes: a randomized trial. *Ann Intern Med* 2005;**143**(8):559-69

**Heliövaara 2007**

Heliövaara MK, Herz M, Teppo AM, et al. Pioglitazone has anti-inflammatory effects in patients with Type 2 diabetes. *J Endocrinol Invest* 2007;**30**(4):292-7

**Henry 2012**

Henry RR, Murray AV, Marmolejo MH, et al. Dapagliflozin, metformin XR, or both: initial pharmacotherapy for type 2 diabetes, a randomised controlled trial. *Int J Clin Pract* 2012;**66**(5):446-56

**Henry 2014**

Henry RR, Staels B, Fonseca VA, et al. Efficacy and safety of initial combination treatment with sitagliptin and pioglitazone-a factorial study. *Diabetes Obes Metab* 2014;**16**(3):223-30

**Hermann 1999**

Hermann LS, Ranstam J, Vaaler S, et al. Effects of antihyperglycaemic therapies on proinsulin and relation between proinsulin and cardiovascular risk factors in type 2 diabetes. *Diabetes Obes Metab* 1999;**1**(4):227-32

**Hiramatsu 2018**

Hiramatsu T, Asano Y, Mabuchi M, et al. Liraglutide relieves cardiac dilated function than DPP-4 inhibitors. *European Journal of Clinical Investigation* 2018;**48**(10):e13007

**Hirano 2009**

Hirano M, Nakamura T, Kitta Y, et al. Rapid improvement of carotid plaque echogenicity within 1 month of pioglitazone treatment in patients with acute coronary syndrome. *Atherosclerosis* 2009;**203**(2):483-8

**Hirano 2012**

Hirano M, Nakamura T, Obata JE, et al. Early improvement in carotid plaque echogenicity by acarbose in patients with acute coronary syndromes. *Circ J* 2012;**76**(6):1452-60

**Hollander 2007**

Hollander P, Yu D, Chou HS. Low-dose rosiglitazone in patients with insulin-requiring type 2 diabetes. *Arch Intern Med* 2007;**167**(12):1284-90

**HOME**

Kooy A, Jager J, Lehert P, et al. Long-term effects of metformin on metabolism and microvascular and macrovascular disease in patients with type 2 diabetes mellitus. *Arch Intern Med* 2009;**169**(6):616-25

**Home 2018**

Home P, Shankar RR, Gantz I, et al. A randomized, double-blind trial evaluating the efficacy and safety of monotherapy with the once-weekly dipeptidyl peptidase-4 inhibitor omarigliptin in people with type 2 diabetes. *Diabetes research and clinical practice* 2018;**138**:253-61

**Hong 2013**

Hong SJ, Hyoung PJ, Lim DS. Effects of pioglitazone on brachial artery flow-mediated dilation and circulating levels of microRNA-21 in hypertensive type II diabetic patients. *J Am Coll Cardiol* 2013;**61**(10 Suppl 1):E2069

**Hong 2015**

Hong SJ, Choi SC, Cho JY, et al. Pioglitazone increases circulating microRNA-24 with decrease in coronary neointimal hyperplasia in type 2 diabetic patients- optical coherence tomography analysis. *Circ J* 2015;**79**(4):880-8

**Hong 2016**

Hong S, Park CY, Han KA, et al. Efficacy and safety of teneligliptin, a novel dipeptidyl peptidase-4 inhibitor, in Korean patients with type 2 diabetes mellitus: A 24-week multicentre, randomized, double-blind, placebo-controlled phase III trial. *Diabetes Obes Metab* 2016;**18**(5):528-32

**Horton 2000**

Horton ES, Clinkingbeard C, Gatlin M, et al. Nateglinide alone and in combination with metformin improves glycemic control by reducing mealtime glucose levels in type 2 diabetes. *Diabetes Care* 2000;**23**(11):1660-5

**Hotta 1993**

Hotta N, Kakuta H, Sano T, et al. Long-term effect of acarbose on glycaemic control in non-insulin-dependent diabetes mellitus: a placebo-controlled double-blind study. *Diabetic Med* 1993;**10**(2):134-8

**Hsieh 2011**

Hsieh SH, Shih KC, Chou CW, et al. Evaluation of the efficacy and tolerability of miglitol in Chinese patients with type 2 diabetes mellitus inadequately controlled by diet and sulfonylureas. *Acta Diabetologica* 2011;**48**(1):71-7

**Hu 2007**

Hu ZY, Zhao JW. Effect of rosiglitazone on serum CRP and plasma PAI-1 in patients with early type 2 diabetic nephropathy. *Central Plains Medical Journal* 2007;**34**(20):27-8

**Hwang 2008**

Hwang YC, Lee EY, Lee WJ, et al. Effects of rosiglitazone on body fat distribution and insulin sensitivity in Korean type 2 diabetes mellitus patients. *Metab Clin Experiment* 2008;**57**(4):479-87

**Hygum 2020**

Hygum K, Harslof T, Jorgensen NR, et al. Bone resorption is unchanged by liraglutide in type 2 diabetes patients: a randomised controlled trial. *Bone* 2020;**132**

**Iacobellis 2020**

Iacobellis G, Gra-Menendez S. Effects of dapagliflozin on epicardial fat thickness in patients with type 2 diabetes and obesity. *Obesity* 2020;**28**(6):1068-74

**Ikonomidis 2018**

Ikonomidis I, Pavlidis G, Lambadiari V, et al. Effects of the glucagon like peptide-1 receptor agonist on arterial stiffness, LV myocardial deformation and oxidative stress in newly diagnosed type 2 diabetes after 6-month treatment. *European Heart Journal* 2018;**39**(Supplement 1):868-69

### **Ikonomidis 2020**

Ikonomidis I, Pavlidis G, Thymis J, et al. Effects of glucagon-like peptide-1 receptor agonists, sodium-glucose cotransporter-2 inhibitors, and their combination on endothelial glycocalyx, arterial function, and myocardial work index in patients with type 2 diabetes mellitus after 12-month treatment. *J Am Heart Assoc* 2020;**9**(9):e015716-

### **ILLUMINATE**

Kashiwagi A, Kazuta K, Goto K, et al. Ipragliflozin in combination with metformin for the treatment of Japanese patients with type 2 diabetes: ILLUMINATE, a randomized, double-blind, placebo-controlled study. *Diabetes Obes Metab* 2015;**17**(3):304-08

### **Inagaki 2012**

Inagaki N, Atsumi Y, Oura T, et al. Efficacy and safety profile of exenatide once weekly compared with insulin once daily in Japanese patients with type 2 diabetes treated with oral antidiabetes drug(s): results from a 26-week, randomized, open-label, parallel-group, multicenter, noninferiority study. *Clin Ther* 2012;**34**(9):1892-908

### **Inagaki 2013**

Inagaki N, Watada H, Murai M, et al. Linagliptin provides effective, well-tolerated add-on therapy to pre-existing oral antidiabetic therapy over 1 year in Japanese patients with type 2 diabetes. *Diabetes Obes Metab* 2013;**15**(9):833-43

### **Inagaki 2014**

Inagaki N, Kondo K, Yoshinari T, et al. Efficacy and safety of canagliflozin monotherapy in Japanese patients with type 2 diabetes inadequately controlled with diet and exercise: A 24-week, randomized, double-blind, placebo-controlled, Phase III study. *Expert Opin Pharmacother* 2014;**15**(11):1501-15

### **Inagaki 2015**

Inagaki N, Onouchi H, Maezawa H, et al. Once-weekly trelagliptin versus daily alogliptin in Japanese patients with type 2 diabetes: A randomised, double-blind, phase 3, non-inferiority study. *Lancet Diabetes Endocrinol* 2015;**3**(3):191-97

### **INICOM**

Lim S, Han KA, Yu J, et al. Efficacy and safety of initial combination therapy with gemigliptin and metformin compared with monotherapy with either drug in patients with type 2 diabetes: A double-blind randomized controlled trial (INICOM study). *Diabetes Obes Metab* 2017;**19**(1):87-97

### **Inoue 2019**

Inoue H, Morino K, Ugi S, et al. Ipragliflozin, a sodium-glucose cotransporter 2 inhibitor, reduces bodyweight and fat mass, but not muscle mass, in Japanese type 2 diabetes patients treated with insulin: a randomized clinical trial. *Journal of diabetes investigation* 2019;**10**(4):1012-21

### **Insulin Glargine 4014 Study**

Rosenstock J, Sugimoto D, Strange P, et al. Triple therapy in type 2 diabetes: insulin glargine or rosiglitazone added to combination therapy of sulfonylurea plus metformin in insulin-naive patients. *Diabetes Care* 2006;**29**(3):554-9

### **INTERVAL**

Strain WD, Lukashovich V, Kothny W, et al. Individualised treatment targets for elderly patients with type 2 diabetes using vildagliptin add-on or lone therapy (INTERVAL): a 24 week, randomised, double-blind, placebo-controlled study. *Lancet* 2013;**382**(9890):409-16

**Ito 2011**

Ito M, Abe M, Okada K, et al. The dipeptidyl peptidase-4 (DPP-4) inhibitor vildagliptin improves glycemic control in type 2 diabetic patients undergoing hemodialysis. *Endocrine J* 2011;**58**(11):979-87

**Ito 2017**

Ito D, Shimizu S, Inoue K, et al. Comparison of Ipragliflozin and Pioglitazone effects on Nonalcoholic fatty liver disease in patients with type 2 diabetes: A randomized, 24-week, open-label, active-controlled trial. *Diabetes Care* 2017;**40**(10):1364-72

**Jabbour 2014**

Jabbour SA, Hardy E, Sugg J, et al. Dapagliflozin is effective as add-on therapy to sitagliptin with or without metformin: A 24-Week, multicenter, randomized, double-blind, placebo-controlled study. *Diabetes Care* 2014;**37**(3):740-50

**Jacob 2007**

Jacob AN, Salinas K, Adams-Huet B, et al. Weight gain in type 2 diabetes mellitus. *Diabetes Obes Metab* 2007;**9**(3):386-93

**Jain 2006**

Jain R, Osei K, Kupfer S, et al. Long-term safety of pioglitazone versus glyburide in patients with recently diagnosed type 2 diabetes mellitus. *Pharmacotherapy* 2006;**26**(10):1388-95

**Jeon 2011**

Jeon HJ, Oh TK. Comparison of vildagliptin-metformin and glimepiride-metformin treatments in type 2 diabetic patients. *Diabetes Metab J* 2011;**35**(5):529-35

**Jeon 2018**

Jeon H, Ku E, Oh T. Dapagliflozin improves blood glucose in diabetes on triple oral hypoglycemic agents having inadequate glucose control. *Diabetes Res Clin Pract* 2018;**142**(pp 188-194)

**Jerums 1987**

Jerums G, Murray RM, Seeman E, et al. Lack of effect of gliclazide on early diabetic nephropathy and retinopathy: a two-year controlled study. *Diabetes Res Clin Pract* 1987;**3**(2):71-80

**Ji 2014**

Ji L, Ma J, Li H, et al. Dapagliflozin as monotherapy in drug-naive asian patients with type 2 diabetes mellitus: A randomized, blinded, prospective phase III study. *Clin Ther* 2014;**36**(1):84-100.e9

**Ji 2016**

Ji L, Han P, Wang X, et al. Randomized clinical trial of the safety and efficacy of sitagliptin and metformin co-administered to Chinese patients with type 2 diabetes mellitus. *Journal of Diabetes Investigation* 2016;**7**(5):727-36

**Ji 2017**

Ji L, Li L, Kuang J, et al. Efficacy and safety of fixed-dose combination therapy, alogliptin plus metformin, in Asian patients with type 2 diabetes: A phase 3 trial. *Diabetes Obes Metab* 2017;**19**(5):754-58

**Jian 2018**

Jian X, Yang QL, Xiao S, et al. The effects of a sodium-glucose cotransporter 2 inhibitor on diabetic nephropathy and serum oxidized low-density lipoprotein levels. *European review for medical and pharmacological sciences* 2018;**22**(12):3994-99

**Jibran 2006**

Jibran R, Suliman MI, Qureshi F, et al. Safety and efficacy of repaglinide compared with glibenclamide in the management of type 2 diabetic Pakistani patients. *Pak J Med Sci* 2006;**22**(4):385-90

**Johnston 1998**

Johnston PS, Feig PU, Coniff RF, et al. Long-term titrated-dose alpha-glucosidase inhibition in non-insulin-requiring Hispanic NIDDM patients. *Diabetes Care* 1998;**21**(3):409-15

**Johnston 1998a**

Johnston PS, Feig PU, Coniff RF, et al. Chronic treatment of African-American type 2 diabetic patients with alpha-glucosidase inhibition. *Diabetes Care* 1998;**21**(3):416-22

**Johnston 1998b**

Johnston PS, Lebovitz HE, Coniff RF, et al. Advantages of alpha-glucosidase inhibition as monotherapy in elderly type 2 diabetic patients. *J Clin Endocrinol Metab* 1998;**83**(5):1515-22

**Josse 2003**

Josse RG, Chiasson JL, Ryan EA, et al. Acarbose in the treatment of elderly patients with type 2 diabetes. *Diabetes Res Clin Pract* 2003;**59**(1):37-42

**Jovanovic 2000**

Jovanovic L, Dailey G, Huang WC, et al. Repaglinide in type 2 diabetes: a 24-week, fixed-dose efficacy and safety study. *J Clin Pharm* 2000;**40**(1):49-57

**Jovanovic 2004**

Jovanovic L, Hassman DR, Gooch B, et al. Treatment of type 2 diabetes with a combination regimen of repaglinide plus pioglitazone. *Diabetes Res Clin Pract* 2004;**63**(2):127-34

**Jung 2005**

Jung HS, Youn BS, Cho YM, et al. The effects of rosiglitazone and metformin on the plasma concentrations of resistin in patients with type 2 diabetes mellitus. *Metabol Clin Exper* 2005;**54**(3):314-20

**Juurinen 2009**

Juurinen L, Tiikkainen M, Saltevo J, et al. Nateglinide combination therapy with basal insulin and metformin in patients with Type 2 diabetes. *Diabetic Med* 2009;**26**(4):409-15

**Kadoglou 2007**

Kadoglou NP, Iliadis F, Liapis CD, et al. Beneficial effects of combined treatment with rosiglitazone and exercise on cardiovascular risk factors in patients with type 2 diabetes. *Diabetes Care* 2007;**30**(9):2242-4

**Kadoglou 2008**

Kadoglou NP, Iliadis F, Angelopoulou N, et al. Beneficial effects of rosiglitazone on novel cardiovascular risk factors in patients with Type 2 diabetes mellitus. *Diabet Med* 2008;**25**(3):333-40

**Kadoglou 2011**

Kadoglou NP, Kapelouzou A, Tsanikidis H, et al. Effects of rosiglitazone/metformin fixed-dose combination therapy and metformin monotherapy on serum vaspin, adiponectin and IL-6 levels in drug-naïve patients with type 2 diabetes. *Exp Clin Endocrinol Diabetes* 2011;**119**(2):63-8

**Kadowaki 2011**

Kadowaki T, Namba M, Imaoka T, et al. Improved glycemic control and reduced bodyweight with exenatide: A double-blind, randomized, phase 3 study in Japanese patients with suboptimally controlled type 2 diabetes over 24 weeks. *J Diabetes Invest* 2011;**2**(3):210-7

**Kadowaki 2017**

Kadowaki T, Inagaki N, Kondo K, et al. Efficacy and safety of canagliflozin as add-on therapy to teneligliptin in Japanese patients with type 2 diabetes mellitus: Results of a 24-week, randomized, double-blind, placebo-controlled trial. *Diabetes Obes Metab* 2017;**19**(6):874-82

**Kadowaki 2018**

Kadowaki T, Inagaki N, Kondo K, et al. Efficacy and safety of teneligliptin added to canagliflozin monotherapy in Japanese patients with type 2 diabetes mellitus: a multicentre, randomized, double-blind, placebo-controlled, parallel-group comparative study. *Diabetes, obesity & metabolism* 2018;**20**(2):453-57

**Kahl 2019**

Kahl S, Gancheva S, Strassburger K, et al. Empagliflozin effectively lowers hepatic steatosis and improves hepatocellular integrity in patients with well-controlled type 2 diabetes. *Inflammatory Intestinal Diseases* 2019;**4**(2):19

**Kaku 2009**

Kaku K. Efficacy and safety of therapy with metformin plus pioglitazone in the treatment of patients with type 2 diabetes: a double-blind, placebo-controlled, clinical trial. *Curr Med Res Opin* 2009;**25**(5):1111-9

**Kaku 2009a**

Kaku K, Daida H, Kashiwagi A, et al. Long-term effects of pioglitazone in Japanese patients with type 2 diabetes without a recent history of macrovascular morbidity. *Curr Med Res Opin* 2009;**25**(12):2925-32

**Kaku 2011**

Kaku K, Rasmussen MF, Nishida T, et al. Fifty-two-week, randomized, multicenter trial to compare the safety and efficacy of the novel glucagon-like peptide-1 analog liraglutide vs glibenclamide in patients with type2 diabetes. *J Diabetes Invest* 2011;**2**(6):441-7

**Kaku 2014**

Kaku K, Kiyosue A, Inoue S, et al. Efficacy and safety of dapagliflozin monotherapy in Japanese patients with type 2 diabetes inadequately controlled by diet and exercise. *Diabetes Obes Metab* 2014;**16**(11):1102-10

**Kaku 2017**

Kaku K, Sumino S, Katou M, et al. Randomized, double-blind, phase III study to evaluate the efficacy and safety of once-daily treatment with alogliptin and metformin hydrochloride in Japanese patients with type 2 diabetes. *Diabetes Obes Metab* 2017;**19**(3):463-67

**Kaku 2019**

Kaku K, Haneda M, Tanaka Y, et al. Linagliptin as add-on to empagliflozin in a fixed-dose combination in Japanese patients with type 2 diabetes: Glycaemic efficacy and safety profile in a two-part, randomized, placebo-controlled trial. *Diabetes, Obesity and Metabolism* 2019;**21**(1):136-45

**Kanazawa 2010**

Kanazawa I, Yamaguchi T, Yano S, et al. Baseline atherosclerosis parameter could assess the risk of bone loss during pioglitazone treatment in type 2 diabetes mellitus. *Osteoporos Int* 2010;**21**(12):2013-8

**Kanazawa 2011**

Kanazawa I, Yamamoto M, Yamaguchi T, et al. Effects of metformin and pioglitazone on serum pentosidine levels in type 2 diabetes mellitus. *Exp Clin Endocrinol Diabetes* 2011;**119**(6):362-5

**Kato 2015**

Kato H, Nagai Y, Ohta A, et al. Effect of sitagliptin on intrahepatic lipid content and body fat in patients with type 2 diabetes. *Diabetes Res Clin Pract* 2015;**109**(1):199-205

**Kawamori 2018**

Kawamori R, Haneda M, Suzaki K, et al. Empagliflozin as add-on to linagliptin in a fixed-dose combination in Japanese patients with type 2 diabetes: Glycaemic efficacy and safety profile in a 52-week, randomized, placebo-controlled trial. *Diabetes, Obesity and Metabolism* 2018;**20**(9):2200-09

**Kelly 2007**

Kelly AS, Thelen AM, Kaiser DR, et al. Rosiglitazone improves endothelial function and inflammation but not asymmetric dimethylarginine or oxidative stress in patients with type 2 diabetes mellitus. *Vasc Med* 2007;**12**(4):311-8

**Kendall 2005**

Kendall DM, Riddle MC, Rosenstock J, et al. Effects of exenatide (exendin-4) on glycemic control over 30 weeks in patients with type 2 diabetes treated with metformin and a sulfonylurea. *Diabetes Care* 2005;**28**(5):1083-91

**Khaloo 2019**

Khaloo P, Asadi Komeleh S, Alemi H, et al. Sitagliptin vs. pioglitazone as add-on treatments in patients with uncontrolled type 2 diabetes on the maximal dose of metformin plus sulfonylurea. *Journal of endocrinological investigation* 2019;**42**(7):851-57

**Khanolkar 2008**



Khanolkar MP, Morris RH, Thomas AW, et al. Rosiglitazone produces a greater reduction in circulating platelet activity compared with gliclazide in patients with type 2 diabetes mellitus--an effect probably mediated by direct platelet PPARgamma activation. *Atherosclerosis* 2008;**197**(2):718-24

**Kikuchi 2012**

Kikuchi M, Kaku K, Odawara M, et al. Efficacy and tolerability of rosiglitazone and pioglitazone in drug-naïve Japanese patients with type 2 diabetes mellitus: a double-blind, 28 weeks' treatment, comparative study. *Curr Med Res Opin* 2012;**28**(6):1007-16

**Kim 2014**

Kim SG, Kim DM, Woo JT, et al. Efficacy and safety of lobeglitazone monotherapy in patients with type 2 diabetes mellitus over 24-weeks: a multicenter, randomized, double-blind, parallel-group, placebo controlled trial. *PLoS ONE* 2014;**9**(4):e92843

**Kim 2020**

Kim SG, Kim KJ, Yoon KH, et al. Efficacy and safety of lobeglitazone versus sitagliptin as an add-on to metformin in patients with type 2 diabetes with two or more components of metabolic syndrome over 24 weeks. *Diabetes Obes Metab* 2020

**Kim Jeong 2019**

Kim JM, Kim SS, Kim JH, et al. Efficacy and safety of pioglitazone versus glimepiride after metformin and alogliptin combination therapy: A randomized, open-label, multicenter, parallel-controlled study. *Diabetes Metab J* 2019

**KIND-KM**

Tanaka K, Saisho Y, Kawai T, et al. Efficacy and safety of liraglutide monotherapy compared with metformin in Japanese overweight/obese patients with type 2 diabetes. *Endocrine J* 2015;**62**(5):399-409

**Kinoshita 2020**

Kinoshita T, Shimoda M, Nakashima K, et al. Comparison of the effects of three kinds of glucose-lowering drugs on non-alcoholic fatty liver disease in patients with type 2 diabetes: a randomized, open-label, three-arm, active control study. *J Diabetes Invest* 2020

**Kiyici 2009**

Kiyici S, Ersoy C, Kaderli A, et al. Effect of rosiglitazone, metformin and medical nutrition treatment on arterial stiffness, serum MMP-9 and MCP-1 levels in drug naive type 2 diabetic patients. *Diabetes Res Clin Pract* 2009;**86**(1):44-50

**Ko 2006**

Ko GT, Tsang PC, Wai HP, et al. Rosiglitazone versus bedtime insulin in the treatment of patients with conventional oral antidiabetic drug failure: a 1-year randomized clinical trial. *Adv Ther* 2006;**23**(5):799-808

**Koffert 2017**

Koffert JP, Mikkola K, Virtanen KA, et al. Metformin treatment significantly enhances intestinal glucose uptake in patients with type 2 diabetes: results from a randomized clinical trial. *Diabetes research and clinical practice* 2017;**131**:208-16

**Kohan 2014**

Kohan DE, Fioretto P, Tang W, et al. Long-term study of patients with type 2 diabetes and moderate renal impairment shows that dapagliflozin reduces weight and blood pressure but does not improve glycemic control. *Kidney Int* 2014;**85**(4):962-71

**Kondo 2016**

Kondo Y, Harada N, Hamasaki A, et al. Sitagliptin monotherapy has better effect on insulinogenic index than glimepiride monotherapy in Japanese patients with type 2 diabetes mellitus: A 52-week, multicenter, parallel-group randomized controlled trial. *Diabetol Metab Syndr* 2016;**8**:15

**Kothny 2013**

Kothny W, Foley J, Kozlovski P, et al. Improved glycaemic control with vildagliptin added to insulin, with or without metformin, in patients with type 2 diabetes mellitus. *Diabetes Obes Metab* 2013;**15**(3):252-7

**Krawczyk 2005**

Krawczyk A, Gajer G, Grzeszczak W, et al. The impact of metformin on metabolic control in obese type 2 diabetic patients treated with insulin. Preliminary observation. Polish. *Diabetologia Doswiadczalna i Kliniczna* 2005;**5**(1):47-51

**Kudo-Fujimaki 2014**

Kudo-Fujimaki K, Hirose T, Yoshihara T, et al. Efficacy and safety of nateglinide plus vildagliptin combination therapy compared with switching to vildagliptin in type 2 diabetes patients inadequately controlled with nateglinide. *J Diabetes Invest* 2014;**5**(4):400-09

**Kumashiro 2018**

Kumashiro N, Ando Y, Shigiyama F, et al. Comparison of canagliflozin and liraglutide as a replacement for bolus insulin in type 2 diabetes patients well-controlled by basalbolus insulin. *Diabetologia* 2018;**61**:S126-

**Laberge 2016**

Laberge A, Brassard P, Arsenault B, et al. Positive effect of the PPAR-gamma agonist rosiglitazone on hemodynamic response to exercise in type 2 diabetic men after coronary artery bypass graft surgery: A 1-yr randomized study. *Can J Cardiol* 2016;**32**(10 Supplement 1):S223-S24

**Lam 1998**

Lam KS, Tiu SC, Tsang MW, et al. Acarbose in NIDDM patients with poor control on conventional oral agents. A 24-week placebo-controlled study. *Diabetes Care* 1998;**21**(7):1154-8

**Lambadiari 2018**

Lambadiari V, Pavlidis G, Kousathana F, et al. Effects of 6-month treatment with the glucagon like peptide-1 analogue liraglutide on arterial stiffness, left ventricular myocardial deformation and oxidative stress in subjects with newly diagnosed type 2 diabetes. *Cardiovascular diabetology* 2018;**17**(1):8

**Langenfeld 2005**

Langenfeld MR, Forst T, Hohberg C, et al. Pioglitazone decreases carotid intima-media thickness independently of glycaemic control in patients with type 2 diabetes mellitus. Results from a controlled randomized study. *Circulation* 2005;**111**:2525-31

**LANTERN**

Kashiwagi A, Takahashi H, Ishikawa H, et al. A randomized, double-blind, placebo-controlled study on long-term efficacy and safety of ipragliflozin treatment in patients with type 2 diabetes mellitus and renal impairment: Results of the Long-Term ASP1941 Safety Evaluation in Patients with Type 2 Diabetes with Renal Impairment (LANTERN) study. *Diab Obes Metab* 2015;**17**(2):152-60

**Lawrence 2004**

Lawrence JM, Reid J, Taylor GJ, et al. Favorable effects of pioglitazone and metformin compared with gliclazide on lipoprotein subfractions in overweight patients with early type 2 diabetes. *Diabetes Care* 2004;**27**(1):41-6

**LEAD-1**

Marre M, Shaw J, Brändle M, et al. Liraglutide, a once-daily human GLP-1 analogue, added to a sulphonylurea over 26 weeks produces greater improvements in glycaemic and weight control compared with adding rosiglitazone or placebo in subjects with Type 2 diabetes (LEAD-1 SU). *Diabet Med* 2009;**26**(3):268-78

**LEAD-2**

Nauck M, Frid A, Hermansen K, et al. Efficacy and safety comparison of liraglutide, glimepiride, and placebo, all in combination with metformin, in type 2 diabetes. *Diabetes Care* 2009;**32**(1):84-90

**LEAD-3**

Garber A, Henry R, Ratner R, et al. Liraglutide versus glimepiride monotherapy for type 2 diabetes (LEAD-3 Mono): a randomised, 52-week, phase III, double-blind, parallel-treatment trial. *Lancet* 2009;**373**(9662):473-81

**LEAD-4**

Zinman B, Gerich J, Buse JB, et al. Efficacy and safety of the human glucagon-like peptide-1 analog liraglutide in combination with metformin and thiazolidinedione in patients with type 2 diabetes (LEAD-4 Met+TZD). *Diabetes Care* 2009;**32**(7):1224-30

**LEAD-5**

Russell-Jones D, Vaag A, Schmitz O, et al. Liraglutide vs insulin glargine and placebo in combination with metformin and sulphonylurea therapy in type 2 diabetes mellitus (LEAD-5 met+SU): a randomised controlled trial. *Diabetologia* 2009;**52**(10):2046-55

**LEADER**

Marso SP, Daniels GH, Brown-Frandsen K, et al. Liraglutide and cardiovascular outcomes in type 2 diabetes. *N Engl J Med* 2016;**375**:311-22

**Lebovitz 2001**

Lebovitz HE, Dole JF, Patwardhan R, et al. Rosiglitazone monotherapy is effective in patients with type 2 diabetes. *J Clin Endocrinol Metab* 2001;**86**(1):280-8

**Ledesma 2019**

Ledesma G, Umpierrez GE, Morley JE, et al. Efficacy and safety of linagliptin to improve glucose control in older people with type 2 diabetes on stable insulin therapy: A randomized trial. *Diabetes, Obesity and Metabolism* 2019

**Lee 2013**

Lee HW, Lee HC, Kim BW, et al. Effects of low dose pioglitazone on restenosis and coronary atherosclerosis in diabetic patients undergoing drug eluting stent implantation. *Yonsei Med J* 2013;**54**(6):1313-20

**Lee 2017**

Lee SH, Gantz I, Round E, et al. A randomized, placebo-controlled clinical trial evaluating the safety and efficacy of the once-weekly DPP-4 inhibitor omarigliptin in patients with type 2 diabetes mellitus inadequately controlled by glimepiride and metformin. *BMC Endocrine Disorders* 2017;**17**(1):70

**Leiter 2014**

Leiter LA, Carr MC, Stewart M, et al. Efficacy and safety of the once-weekly GLP-1 receptor agonist albiglutide versus sitagliptin in patients with type 2 diabetes and renal impairment: A randomized phase III study. *Diabetes Care* 2014;**37**(10):2723-30

**Leiter 2014a**

Leiter LA, Cefalu WT, De Bruin TWA, et al. Dapagliflozin added to usual care in individuals with type 2 diabetes mellitus with preexisting cardiovascular disease: A 24-week, multicenter, randomized, double-blind, placebo-controlled study with a 28-week extension. *J Am Geriatr Soc* 2014;**62**(7):1252-62

**Leonhardt 1991**

Leonhardt W, Hanefeld M, Fischer S, et al. Beneficial effects on serum lipids in noninsulin dependent diabetics by acarbose treatment. *Arzneimittel-Forschung* 1991;**41**(7):735-8

**Lewin 2007**

Lewin A, Lipetz R, Wu J, et al. Comparison of extended-release metformin in combination with a sulfonylurea (glyburide) to sulfonylurea monotherapy in adult patients with type 2 diabetes: a multicenter, double-blind, randomized, controlled, phase III study. *Clin Ther* 2007;**29**(5):844-55

**Lewin 2015**

Lewin A, DeFronzo RA, Patel S, et al. Initial combination of empagliflozin and linagliptin in subjects with type 2 diabetes. *Diabetes Care* 2015;**38**(3):394-402

**Li 2014**

Li CJ, Yu Q, Yu P, et al. Efficacy and safety comparison of add-on therapy with liraglutide, saxagliptin and vildagliptin, all in combination with current conventional oral hypoglycemic agents therapy in poorly controlled Chinese type 2 diabetes. *Exp Clin Endocrinol Diabetes* 2014;**122**(8):469-76

**Li 2014a**

Li JL, Feng ZP, Li QF, et al. Insulin glargine effectively achieves glycemic control and improves insulin resistance in patients with early type 2 diabetes that exhibit a high risk for cardiovascular disease. *Exp Ther Med* 2014;**8**(1):147-52

**Li 2017**

Li F, Shen Y, Sun R, et al. Effects of Vildagliptin Add-on Insulin Therapy on Nocturnal Glycemic Variations in Uncontrolled Type 2 Diabetes. *Diabetes therapy* 2017;**8**(5):1111-22

**Li 2019**

Li J-J, Zhang P, Fan B, et al. The efficacy of saxagliptin in T2DM patients with non-alcoholic fatty liver disease: preliminary data. *Revista da Associacao Medica Brasileira (1992)* 2019;**65**(1):33-37

**Li 2019a**

Li H, Xu X, Wang J, et al. A Randomized Study to Compare the Effects of Once-Weekly Dulaglutide Injection and Once-Daily Glimepiride on Glucose Fluctuation of Type 2 Diabetes Mellitus Patients: a 26-Week Follow-Up. *Journal of diabetes research* 2019;**2019**:6423987-

**Li 2020**

Li B, Luo YR, Tian F, et al. Sitagliptin attenuates the progression of coronary atherosclerosis in patients with coronary disease and type 2 diabetes. *Atherosclerosis* 2020;**300**:10-18

**LIBRA**

Kramer CK, Zinman B, Choi H, et al. The impact of chronic liraglutide therapy on glucagon secretion in type 2 diabetes: Insight from the LIBRA trial. *J Clin Endocrinol Metabol* 2015; 100(10):3702-9

**Lim 2017**

Lim S, Kim KM, Kim SG, et al. Effects of lobe-glitazone, a novel thiazolidinedione, on bone mineral density in patients with type 2 diabetes mellitus over 52 weeks. *Diabetes & metabolism journal* 2017;**41**(5):377-85

**Lin 2003**

Lin BJ, Wu HP, Huang HS, et al. Efficacy and tolerability of acarbose in Asian patients with type 2 diabetes inadequately controlled with diet and sulfonylureas. *J Diabetes Complications* 2003;**17**(4):179-85

**Linagliptin-LTC Trial**

Umpierrez GE, Cardona S, Chachkhiani D, et al. A randomized controlled study comparing a DPP4 inhibitor (Linagliptin) and basal insulin (Glargine) in patients with type 2 diabetes in long-term care and skilled nursing facilities: Linagliptin-LTC Trial. *J Am Med Directors Assoc* 2018;**19**(5):399

**Lindstrom 2000**

Lindstrom J, Tuomilehto J, Spengler M. Acarbose treatment does not change the habitual diet of patients with Type 2 diabetes mellitus. *Diabetic Med* 2000;**17**(1):20-5

**Lingvay 2018**

Lingvay I, Desouza CV, Lalic KS, et al. A 26-Week Randomized Controlled Trial of Semaglutide Once Daily Versus Liraglutide and Placebo in Patients With Type 2 Diabetes Suboptimally Controlled on Diet and Exercise With or Without Metformin. *Diabetes care* 2018;**41**(9):1926-37

**LIPER2**

Wagner AM, Miranda-Calderin G, Ugarte-Lopetegui MA, et al. Effect of liraglutide on physical performance in type 2 diabetes: Results of a randomized, double-blind, controlled trial (LIPER2). *Diabetes and Metabolism* 2019;**45**(3):268-75

**LIRA-ADD2SGLT2i**

Blonde L, Belousova L, Fainberg U, et al. Liraglutide as add-on to sodium-glucose co-transporter-2 inhibitors in patients with inadequately controlled type 2 diabetes: LIRA-ADD2SGLT2i, a 26-week, randomized, double-blind, placebo-controlled trial. *Diab Obes Metab* 2020

#### **Liraglutide-Detemir Study**

DeVries JH, Bain SC, Rodbard HW, et al. Sequential intensification of metformin treatment in type 2 diabetes with liraglutide followed by randomized addition of basal insulin prompted by A1C targets. *Diabetes Care* 2012;**35**(7):1446-54

#### **LIRA-RENAL**

Davies MJ, Bain SC, Atkin SL, et al. Efficacy and safety of liraglutide versus placebo as add-on to glucose-lowering therapy in patients with type 2 diabetes and moderate renal impairment (LIRA-RENAL): A randomized clinical trial. *Diabetes Care* 2016;**39**(2):222-30

#### **LIRA-SWITCH**

Bailey TS, Takacs R, Tinahones FJ, et al. Efficacy and safety of switching from sitagliptin to liraglutide in subjects with type 2 diabetes (LIRA-SWITCH): a randomized, double-blind, double-dummy, active-controlled 26-week trial. *Diabetes Obes Metab* 2016;**18**(12):1191-98

#### **Liu 2013**

Liu SC, Chien KL, Wang CH, et al. Efficacy and safety of adding pioglitazone or sitagliptin to patients with type 2 diabetes insufficiently controlled with metformin and a sulfonylurea. *Endocr Pract* 2013;**19**(6):980-88

#### **Liu 2014**

Liu B, Wang J, Wang G. Beneficial effects of pioglitazone on retardation of persistent atrial fibrillation progression in diabetes mellitus patients. *Int Heart J* 2014; 55(6):499-505

#### **Liu 2020**

Liu L, Yan H, Xia M, et al. Efficacy of exenatide and insulin glargine on nonalcoholic fatty liver disease in patients with type 2 diabetes mellitus. *Diabetes Metabol Res Rev* 2020

#### **Liutkus 2010**

Liutkus J, Rosas Guzman J, Norwood P, et al. A placebo-controlled trial of exenatide twice-daily added to thiazolidinediones alone or in combination with metformin. *Diabetes Obes Metab* 2010;**12**(12):1058-65

#### **LixiLan JP-L**

Kaneto H, Takami A, Spranger R, et al. Efficacy and safety of insulin glargine/lixisenatide fixed-ratio combination (iGlarLixi) in Japanese patients with type 2 diabetes mellitus inadequately controlled on basal insulin and oral antidiabetic drugs: the LixiLan JP-L Randomized Clinical Trial. *Diab Obes Metab* 2020

#### **LixiLan JP-O1**

Watada H, Takami A, Spranger R, et al. Efficacy and safety of 1: 1 fixed-ratio combination of insulin glargine and lixisenatide versus lixisenatide in Japanese patients with type 2 diabetes inadequately controlled on oral antidiabetic drugs: the LixiLan JP-O1 randomized clinical trial. *Diabetes Care* 2020;**43**:1249-57

#### **LixiLan JP-O2**

Terauchi Y, Nakama T, Spranger R, et al. Efficacy and safety of insulin glargine/lixisenatide fixed-ratio combination (iGlarLixi 1: 1) in Japanese patients with type 2 diabetes mellitus inadequately controlled on oral antidiabetic drugs: a randomized, 26-week, open-label, multicenter study: the LixiLan JP-O2 Randomized Clinical Trial. *Diabetes Obes Metab* 2020

**LixiLan-G**

Blonde L, Rosenstock J, Del Prato S, et al. Switching to iGlarLixi Versus Continuing Daily or Weekly GLP-1 RA in Type 2 Diabetes Inadequately Controlled by GLP-1 RA and Oral Antihyperglycemic Therapy: the LixiLan-G Randomized Clinical Trial. *Diabetes care* 2019

**LixiLan-L**

Aroda VR, Rosenstock J, Wysham C, et al. Efficacy and safety of LixiLan, a titratable fixed-ratio combination of insulin glargine plus lixisenatide in type 2 diabetes inadequately controlled on basal insulin and metformin: The LixiLan-L randomized trial. *Diabetes Care* 2016;**39**(11):1972-80

**Lou 2020**

Lou N, Wu X, Wang Y, et al. Liraglutide improves postprandial blood glucose, blood glucose levels, insulin resistance and physical distribution of t2dm patients with ms. *Int J Clin Experimental Med* 2020;**13**(2):518-24

**Lu 2016**

Lu CH, Min KW, Chuang LM, et al. Efficacy, safety, and tolerability of ipragliflozin in Asian patients with type 2 diabetes mellitus and inadequate glycemic control with metformin: Results of a phase 3 randomized, placebo-controlled, double-blind, multicenter trial. *J Diabetes Invest* 2016;**7**(3):366-73

**Lukashevich 2011**

Lukashevich V, Schweizer A, Shao Q, et al. Safety and efficacy of vildagliptin versus placebo in patients with type 2 diabetes and moderate or severe renal impairment: a prospective 24-week randomized placebo-controlled trial. *Diabetes Obes Metab* 2011;**13**(10):947-54

**Lund 2009**

Lund SS, Tarnow L, Frandsen M, et al. Combining insulin with metformin or an insulin secretagogue in non-obese patients with type 2 diabetes: 12 month, randomised, double blind trial. *BMJ* 2009;**339**:b4324

**LYDIA**

Htike ZZ, Yates T, Brady EM, et al. Rationale and design of the randomised controlled trial to assess the impact of liraglutide on cardiac function and structure in young adults with type 2 diabetes (the LYDIA study). *Cardiovascular Diabetology* 2016;**15**(1):102

**Ma 2015**

Ma L, Li J, Zhang L, et al. The effect of metformin and pioglitazone on glucagon of patients with diabetes and metabolic syndrome. [Chinese]. *Chinese Journal of Clinical Nutrition* 2015;**23**(2):65-72

**Macauley 2015**

Macauley M, Hollingsworth KG, Smith FE, et al. Effect of vildagliptin on hepatic steatosis. *J Clin Endocrinol Metabol* 2015; 100(4):1578-85

**Madsbad 2011**

Madsbad S, Kilhovd B, Lager I, et al. Comparison between repaglinide and glipizide in Type 2 diabetes mellitus: a 1-year multicentre study. *Diabetic Med* 2001;**18**(5):395-401

**Maffioli 2013**

Maffioli P, Fogari E, D'Angelo A, et al. Ultrasonography modifications of visceral and subcutaneous adipose tissue after pioglitazone or glibenclamide therapy combined with rosuvastatin in type 2 diabetic patients not well controlled by metformin. *Eur J Gastroenterol Hepatol* 2013;**25**(9):1113-22

**MAGNA VICTORIA**

Bizino MB, Jazet IM, Westenberg JJM, et al. Effect of liraglutide on cardiac function in patients with type 2 diabetes mellitus: Randomized placebo-controlled trial. *Cardiovascular Diabetology* 2019;**18**(1):55

**Marbury 1999**

Marbury T, Huang WC, Strange P, et al. Repaglinide versus glyburide: a one-year comparison trial. *Diabetes Res Clin Pract* 1999;**43**(3):155-66

**MARCH**

Yang W, Shan Z, Tian H, et al. Acarbose compared with metformin as initial therapy in patients with newly diagnosed type 2 diabetes: An open-label, non-inferiority randomised trial. *Lancet Diabetes Endocrinol* 2014;**2**(1):46-55

**Marena 1993**

Marena S, Pagani A, Montegrosso G, et al. Comparison of miglitol and glibenclamide in non insulin-dependent diabetic patients. *G Ital Diabetol* 1993;**13**(4):383-8

**Mari 2008**

Mari A, Scherbaum WA, Nilsson PM, et al. Characterization of the influence of vildagliptin on model-assessed -cell function in patients with type 2 diabetes and mild hyperglycemia. *J Clin Endocrinol Metab* 2008;**93**(1):103-9

**MARLINA-T2D trial**

Groop PH, Cooper ME, Perkovic V, et al. Linagliptin and its effects on hyperglycaemia and albuminuria in patients with type 2 diabetes and renal dysfunction: the randomized MARLINA-T2D trial. *Diabetes, Obesity and Metabolism* 2017;**19**(11):1610-19

**Marre 2002**

Marre M, Gaal L, Usadel KH, et al. Nateglinide improves glycaemic control when added to metformin monotherapy: results of a randomized trial with type 2 diabetes patients. *Diabetes Obes Metab* 2002;**4**(3):177-86

**Maruyama 2019**

Maruyama T, Takashima H, Tei R, et al. MON-300 Efficacy and safety of canagliflozin, a sodium glucose cotransporter 2 (SGLT2) inhibitor, in diabetic kidney disease: A randomized open-label prospective trial. *Kidney Int Rep* 2019;**4**(7 Supplement):S422-S23

**MASTER**

Mikada A, Narita T, Yokoyama H, et al. Effects of miglitol, sitagliptin, and initial combination therapy with both on plasma incretin responses to a mixed meal and visceral fat in over-weight



Japanese patients with type 2 diabetes. "the MASTER randomized, controlled trial". Diabetes Res Clin Pract 2014;**106**(3):538-47

**Mathieu 2015**

Mathieu C, Shankar RR, Lorber D, et al. A randomized clinical trial to evaluate the efficacy and safety of co-administration of sitagliptin with intensively titrated insulin glargine. Diabetes Ther 2015;**6**(2):127-42

**Mathieu 2016**

Mathieu C, Herrera Marmolejo M, Gonzalez Gonzalez JG, et al. Efficacy and safety of triple therapy with dapagliflozin add-on to saxagliptin plus metformin over 52 weeks in patients with type 2 diabetes. Diabetes Obes Metab 2016;**18**(11):1134-37

**Matthaei 2015**

Matthaei S, Catrinou D, Celinski A, et al. Randomized, double-blind trial of triple therapy with saxagliptin add-on to dapagliflozin plus metformin in patients with type 2 diabetes. Diabetes Care 2015;**38**(11):2018-24

**Matthaei 2015a**

Matthaei S, Bowering K, Rohwedder K, et al. Dapagliflozin improves glycemic control and reduces body weight as add-on therapy to metformin plus sulfonylurea: a 24-week randomized, double-blind clinical trial. Diabetes Care 2015;**38**(3):365-72

**Matthews 2005**

Matthews DR, Charbonnel BH, Hanefeld M, et al. Long-term therapy with addition of pioglitazone to metformin compared with the addition of gliclazide to metformin in patients with type 2 diabetes: a randomized, comparative study. Diabetes Metab Res Rev 2005;**21**(2):167-74

**Matthews 2010**

Matthews DR, Dejager S, Ahren B, et al. Vildagliptin add-on to metformin produces similar efficacy and reduced hypoglycaemic risk compared with glimepiride, with no weight gain: results from a 2-year study. Diabetes Obes Metab 2010;**12**(9):780-9

**Mattoo 2005**

Mattoo V, Eckland D, Widel M, et al. Metabolic effects of pioglitazone in combination with insulin in patients with type 2 diabetes mellitus whose disease is not adequately controlled with insulin therapy: results of a six-month, randomized, double-blind, prospective, multicenter, parallel-group study. Clin Ther 2005;**27**(5):554-67

**McCluskey 2004**

McCluskey D, Touger MS, Melis R, et al. Results of a randomized, double-blind, placebo-controlled study administering glimepiride to patients with type 2 diabetes mellitus inadequately controlled with rosiglitazone monotherapy. Clin Ther 2004;**26**(11):1783-90

**McGill 2013**

McGill JB, Sloan L, Newman J, et al. Long-term efficacy and safety of linagliptin in patients with type 2 diabetes and severe renal impairment: a 1-year, randomized, double-blind, placebo-controlled study. Diabetes Care 2013;**36**(2):237-44

**McGuire 2010**

McGuire DK, Abdullah SM, See R, et al. Randomized comparison of the effects of rosiglitazone vs. placebo on peak integrated cardiovascular performance, cardiac structure, and function. *Eur Heart J* 2010;**31**(18):2262-70

**MDI Liraglutide**

Lind M, Hirsch IB, Tuomilehto J, et al. Liraglutide in people treated for type 2 diabetes with multiple daily insulin injections: randomised clinical trial (MDI Liraglutide trial). *BMJ* 2015;**351**:h5364

**Meneghini 2010**

Meneghini LF, Traylor L, Schwartz SL. Improved glycemic control with insulin glargine versus pioglitazone as add-on therapy to sulfonylurea or metformin in patients with uncontrolled type 2 diabetes mellitus. *Endocr Pract* 2010;**16**(4):588-99

**Meneilly 2000**

Meneilly GS, Ryan EA, Radziuk J, et al. Effect of acarbose on insulin sensitivity in elderly patients with diabetes. *Diabetes Care* 2000;**23**(8):1162-7

**Milovanova 2019**

Milovanova L, Taranova M, Milovanova S, et al. DPP-4 inhibitors (linagliptin) impact on klotho serum level in patients with type 2 diabetes. *Diabetes Technol Ther* 2019;**21**(Supplement 1):A147

**Mita 2007**

Mita T, Watada H, Shimizu T, et al. Nateglinide reduces carotid intima-media thickening in type 2 diabetic patients under good glycemic control. *Arterioscler Thromb Vasc Biol* 2007;**27**(11):2456-62

**Mita 2019**

Mita T, Hiyoshi T, Yoshii H, et al. The Effect of Linagliptin versus Metformin Treatment-Related Quality of Life in Patients with Type 2 Diabetes Mellitus. *Diabetes therapy* 2019;**10**(1):119-34

**Mitrakou 1998**

Mitrakou A, Tountas N, Raptis AE, et al. Long-term effectiveness of a new alpha-glucosidase inhibitor (BAY m1099-miglitol) in insulin-treated type 2 diabetes mellitus. *Diabet Med* 1998;**15**(8):657-60

**Miyagawa 2015**

Miyagawa J, Odawara M, Takamura T, et al. Once-weekly glucagon-like peptide-1 receptor agonist dulaglutide is non-inferior to once-daily liraglutide and superior to placebo in Japanese patients with type 2 diabetes: a 26-week randomized phase III study. *Diabetes Obes Metab* 2015;**17**(10):974-83

**Miyazaki 2002**

Miyazaki Y, Matsuda M, DeFronzo RA. Dose-response effect of pioglitazone on insulin sensitivity and insulin secretion in type 2 diabetes. *Diabetes Care* 2002;**25**(3):517-23

**Mokta 2018**

Mokta JK, Ramesh, Sahai AK, et al. Comparison of Safety and Efficacy of Glimepiride-Metformin and Vildagliptin- Metformin Treatment in Newly Diagnosed Type 2 Diabetic Patients. *The Journal of the Association of Physicians of India* 2018;**66**(8):30-35

**Moretto 2008**

Moretto TJ, Milton DR, Ridge TD, et al. Efficacy and tolerability of exenatide monotherapy over 24 weeks in antidiabetic drug-naive patients with type 2 diabetes: a randomized, double-blind, placebo-controlled, parallel-group study. *Clin Ther* 2008;**30**(8):1448-60

**Morino 2018**

Morino K, Inoue H, Fuse K, et al. Ipragliflozin, a SGLT2 inhibitor, reduced body weight and fat mass but not muscle mass in Japanese type 2 diabetic patients treated with insulin-a randomized clinical trial. *Diabetes* 2018;**67**:A322-

**Moriwaki 2018**

Moriwaki K, Takeuchi T, Fujimoto N, et al. Effect of sitagliptin on coronary flow reserve assessed by magnetic resonance imaging in type 2 diabetic patients with coronary artery disease. *Circulation journal* 2018;**82**(8):2119-27

**Moses 2014**

Moses RG, Kalra S, Brook D, et al. A randomized controlled trial of the efficacy and safety of saxagliptin as add-on therapy in patients with type 2 diabetes and inadequate glycaemic control on metformin plus a sulphonylurea. *Diabetes Obes Metab* 2014;**16**(5):443-50

**Moses 2016**

Moses RG, Round E, Shentu Y, et al. A randomized clinical trial evaluating the safety and efficacy of sitagliptin added to the combination of sulfonylurea and metformin in patients with type 2 diabetes mellitus and inadequate glycemc control. *J Diabetes* 2016;**8**(5):701-11

**Mu 2017**

Mu Y, Pan C, Fan B, et al. Efficacy and safety of linagliptin/metformin single-pill combination as initial therapy in drug-naive Asian patients with type 2 diabetes. *Diabetes Res Clin Pract* 2017;**124**:48-56

**Müller-Wieland 2018**

Müller-Wieland D, Kellerer M, Cypryk K, et al. Efficacy and safety of dapagliflozin or dapagliflozin plus saxagliptin versus glimepiride as add-on to metformin in patients with type 2 diabetes. *Diabetes, obesity & metabolism* 2018;**20**(11):2598-607

**Nakamura 2001**

Nakamura T, Ushiyama C, Osada S, et al. Pioglitazone reduces urinary podocyte excretion in type 2 diabetes patients with microalbuminuria. *Metabolism* 2001;**50**(10):1193-6

**Nakamura 2004**

Nakamura T, Matsuda T, Kawagoe Y, et al. Effect of pioglitazone on carotid intima-media thickness and arterial stiffness in type 2 diabetic nephropathy patients. *Metabolism* 2004;**53**(10):1382-6

**Nakamura 2006**

Nakamura T, Sugaya T, Kawagoe Y, et al. Effect of pioglitazone on urinary liver-type fatty acid-binding protein concentrations in diabetes patients with microalbuminuria. *Diabetes Metab Res Rev* 2006;**22**(5):385-9

**Nar 2009**

Nar A, Gedik O. The effect of metformin on leptin in obese patients with type 2 diabetes mellitus and nonalcoholic fatty liver disease. *Acta Diabetol* 2009;**46**(2):113-8

**Nathan 1988**

Nathan DM, Roussel A, Godine JE. Glyburide or insulin for metabolic control in non-insulin-dependent diabetes mellitus. A randomized, double-blind study. *Ann Intern Med* 1988;**108**(3):334-40

**Nauck 2007a**

Nauck MA, Duran S, Kim D, et al. A comparison of twice-daily exenatide and biphasic insulin aspart in patients with type 2 diabetes who were suboptimally controlled with sulfonylurea and metformin: a non-inferiority study. *Diabetologia* 2007;**50**(2):259-67

**Nauck 2007b**

Nauck MA, Meininger G, Sheng D, et al. Efficacy and safety of the dipeptidyl peptidase-4 inhibitor, sitagliptin, compared with the sulfonylurea, glipizide, in patients with type 2 diabetes inadequately controlled on metformin alone: a randomized, double-blind, non-inferiority trial. *Diabetes Obes Metab* 2007;**9**(2):194-205

**Nauck 2009**

Nauck MA, Ellis GC, Fleck PR, et al. Efficacy and safety of adding the dipeptidyl peptidase-4 inhibitor alogliptin to metformin therapy in patients with type 2 diabetes inadequately controlled with metformin monotherapy: a multicentre, randomised, double-blind, placebo-controlled study. *Int J Clin Pract* 2009;**63**(1):46-55

**Nauck 2011**

Nauck MA, Prato S, Meier JJ, et al. Dapagliflozin versus glipizide as add-on therapy in patients with type 2 diabetes who have inadequate glycemic control with metformin: a randomized, 52-week, double-blind, active-controlled noninferiority trial. *Diabetes Care* 2011;**34**(9):2015-22

**Nauck 2016**

Nauck MA, Di Domenico M, Patel S, et al. Linagliptin and pioglitazone combination therapy versus monotherapy with linagliptin or pioglitazone: A randomised, double-blind, parallel-group, multinational clinical trial. *Diabetes Vasc Dis Res* 2016;**13**(4):286-98

**Neff 2016**

Neff KJ, Tobin LM, Hogan AE, et al. The effect of low dose liraglutide on renal inflammation in type 2 diabetic kidney disease: A randomised controlled study. *Diabet Med* 2016;**33**(Suppl 1):64

**Negro 2005**

Negro R, Mangieri T, Dazzi D, et al. Rosiglitazone effects on blood pressure and metabolic parameters in nondipper diabetic patients. *Diabetes Res Clin Pract* 2005;**70**(1):20-5

**Ning 2016**

Ning G, Li L, Ma J, et al. Vildagliptin as add-on therapy to insulin improves glycemic control without increasing risk of hypoglycemia in Asian, predominantly Chinese, patients with type 2 diabetes mellitus. *J Diabetes* 2016;**8**(3):345-53

**Nino 2017**

Nino A, Okuda I, Wilson TH, et al. Weekly glucagon-like peptide-1 receptor agonist albiglutide as monotherapy improves glycemic parameters in Japanese patients with type 2 diabetes mellitus: A randomized, double-blind, placebo-controlled study. *Journal of Diabetes Investigation* 2018;**9**(3):558-66

**Nishimura 2016**

Nishimura A, Usui S, Kumashiro N, et al. Efficacy and safety of repaglinide added to sitagliptin in Japanese patients with type 2 diabetes: A randomized 24-week open-label clinical trial. *Endocrine J* 2016;**63**(12):1087-98

**Nishio 2006**

Nishio K, Sakurai M, Kusuyama T, et al. A randomized comparison of pioglitazone to inhibit restenosis after coronary stenting in patients with type 2 diabetes. *Diabetes Care* 2006;**29**(1):101-6

**Nogueira 2014**

Nogueira KC, Furtado M, Fukui RT, et al. Left ventricular diastolic function in patients with type 2 diabetes treated with a dipeptidyl peptidase-4 inhibitor- a pilot study. *Diabetol Metab Syndr* 2014;**6**(1)

**Nowicki 2011**

Nowicki M, Rychlik I, Haller H, et al. Long-term treatment with the dipeptidyl peptidase-4 inhibitor saxagliptin in patients with type 2 diabetes mellitus and renal impairment: a randomised controlled 52-week efficacy and safety study. *Int J Clin Pract* 2011;**65**(12):1230-9

**Ogasawara 2009**

Ogasawara D, Shite J, Shinke T, et al. Pioglitazone reduces the necrotic-core component in coronary plaque in association with enhanced plasma adiponectin in patients with type 2 diabetes mellitus. *Circ J* 2009;**73**(2):343-51

**Oh 2019**

Oh TJ, Yu JM, Min KW, et al. Efficacy and safety of voglibose plus metformin in patients with type 2 diabetes mellitus: A randomized controlled trial. *Diabetes Metab J* 2019;**43**(3):276-86

**Ohira 2014**

Ohira M, Yamaguchi T, Saiki A, et al. Metformin reduces circulating malondialdehyde-modified low-density lipoprotein in type 2 diabetes mellitus. *Clin Invest Med* 2014;**37**(4):E243-51

**Ohira 2014a**

Ohira M, Yamaguchi T, Saiki A, et al. Pioglitazone improves the cardio-ankle vascular index in patients with type 2 diabetes mellitus treated with metformin. *Diabetes Metab Syndr Obes* 2014;**7**:313-19

**Omarigliptin 015 Protocol**

Gantz I, Okamoto T, Ito Y, et al. A randomized, placebo-controlled trial evaluating the safety and efficacy of adding omarigliptin to antihyperglycemic therapies in Japanese patients with type 2 diabetes and inadequate glycemic control. *Diabetes Ther* 2017;**8**(4):793-810

**Omarigliptin Protocol 020**

Gantz I, Okamoto T, Ito Y, et al. A randomized, placebo- and sitagliptin-controlled trial of the safety and efficacy of omarigliptin, a once-weekly dipeptidyl peptidase-4 inhibitor, in Japanese patients with type 2 diabetes. *Diab Obes Metab* 2017;**19**(11):1602-09

**Onoue 2020**

Onoue T, Goto M, Wada E, et al. Dipeptidyl peptidase-4 inhibitor anagliptin reduces fasting apolipoprotein B-48 levels in patients with type 2 diabetes: A randomized controlled trial. *PLoS ONE* 2020;**15**(1):e0228004

**Onuchin 2010**

Onuchin SG, Elsukova OS, Solov'ev OV, et al. Capabilities of hypoglycemic therapy in women with decompensated type 2 diabetes mellitus. *Terapevticheski Arkhiv* 2010;**82**(8):34-41

**Osman 2004**

Osman A, Otero J, Brizolara A, et al. Effect of rosiglitazone on restenosis after coronary stenting in patients with type 2 diabetes. *Am Heart J* 2004;**147**(5):e23

**Ovalle 2004**

Ovalle F, Bell DS. Effect of rosiglitazone versus insulin on the pancreatic beta-cell function of subjects with type 2 diabetes. *Diabetes Care* 2004;**27**(11):2585-9

**Owens 2011**

Owens DR, Swallow R, Dugi KA, et al. Efficacy and safety of linagliptin in persons with type 2 diabetes inadequately controlled by a combination of metformin and sulphonylurea: a 24-week randomized study. *Diabetic Med* 2011;**28**(11):1352-61

**Oyama 2008**

Oyama T, Saiki A, Endoh K, et al. Effect of acarbose, an alpha-glucosidase inhibitor, on serum lipoprotein lipase mass levels and common carotid artery intima-media thickness in type 2 diabetes mellitus treated by sulfonylurea. *J Atheroscler Thromb* 2008;**15**(3):154-9

**Pagano 1995**

Pagano G, Marena S, Corgiat-Mansin L, et al. Comparison of miglitol and glibenclamide in diet-treated type 2 diabetic patients. *Diabete Metab* 1995;**21**(3):162-7

**Pan 2008**

Pan C, Yang W, Barona JP, et al. Comparison of vildagliptin and acarbose monotherapy in patients with Type 2 diabetes: a 24-week, double-blind, randomized trial. *Diabetic Med* 2008;**25**(4):435-41

**Pan 2012**

Pan C, Xing X, Han P, et al. Efficacy and tolerability of vildagliptin as add-on therapy to metformin in Chinese patients with type 2 diabetes mellitus. *Diabetes Obes Metab* 2012;**14**(8):737-44

**Pan 2012a**

Pan CY, Yang W, Tou C, et al. Efficacy and safety of saxagliptin in drug-naïve Asian patients with type 2 diabetes mellitus: a randomized controlled trial. *Diabetes Metab Res Rev* 2012;**28**(3):268-75

**Pan 2015**

Pan C, Lu J, Li X, et al. Efficacy and safety of retagliptin in Chinese patients with type 2 diabetes mellitus. *Diabetes* 2015; 64:A307

**Park 2011**

Park JS, Cho MH, Nam JS, et al. Effect of pioglitazone on serum concentrations of osteoprotegerin in patients with type 2 diabetes mellitus. *Eur J Endocrinol* 2011;**164**(1):69-74

**Park 2014**

Park CY, Kang JG, Chon S, et al. Comparison between the therapeutic effect of metformin, glimepiride and their combination as an add-on treatment to insulin glargine in uncontrolled patients with type 2 diabetes. *PLoS ONE* 2014;**9**(3):e88779

**Park 2017**

Park J, Park SW, Yoon KH, et al. Efficacy and safety of evogliptin monotherapy in patients with type 2 diabetes and moderately elevated glycosylated haemoglobin levels after diet and exercise. *Diabetes, obesity & metabolism* 2017;**19**(12):1681-87

**Parmar Vinendra 2019**

Parmar Vinendra M, Goswami Sunita S. Efficacy and safety of teneligliptin as add-on therapy to conventional therapy in Indian patients with type 2 diabetes mellitus. *Asian J Pharm Clin Res* 2019;**12**(12):116-20

**Parthan 2018**

Parthan G, Bhansali S, Kurpad AV, et al. Effect of Linagliptin and Voglibose on metabolic profile in patients with Type 2 Diabetes: A randomized, double-blind, placebo-controlled trial. *BMC Pharmacology and Toxicology* 2018;**19**(1):38

**Patel 2013**

Kirkman MS, Shankar RR, Shankar S, et al. Treating postprandial hyperglycemia does not appear to delay progression of early type 2 diabetes: the Early Diabetes Intervention Program. *Diabetes Care* 2006;**29**(9):2095-101

**Pavithra 2019**

Pavithra D, Praveen D, Chowdary PR, et al. A prospective randomized control study on effect of liraglutide on cardiovascular outcomes in type II diabetes mellitus. *Drug Invention Today* 2019;**12**(11):2549-52

**Pavo 2003**

Pavo I, Jermendy G, Varkonyi TT, et al. Effect of pioglitazone compared with metformin on glycemic control and indicators of insulin sensitivity in recently diagnosed patients with type 2 diabetes. *J Clin Endocrinol Metab* 2003;**88**(4):1637-45

**Perez 2009**

Perez A, Zhao Z, Jacks R, et al. Efficacy and safety of pioglitazone/metformin fixed-dose combination therapy compared with pioglitazone and metformin monotherapy in treating patients with T2DM. *Curr Med Res Opin* 2009;**25**(12):2915-23

**PERISCOPE**

Nissen SE, Nicholls SJ, Wolski K, et al. Comparison of pioglitazone vs glimepiride on progression of coronary atherosclerosis in patients with type 2 diabetes: the PERISCOPE randomized controlled trial. *JAMA* 2008;**299**(13):1561-73

**Perriello 2006**

Perriello G, Pampanelli S, Pietro C, et al. Comparison of glycaemic control over 1 year with pioglitazone or gliclazide in patients with Type 2 diabetes. *Diabetic Med* 2006;**23**(3):246-52

**Petrica 2009**

Petrica L, Petrica M, Vlad A, et al. Nephro- and neuroprotective effects of rosiglitazone versus glimepiride in normoalbuminuric patients with type 2 diabetes mellitus: a randomized controlled trial. *Wiener Klinische Wochenschrift* 2009;**121**(23-24):765-75

**Petrica 2011**

Petrica L, Vlad A, Petrica M, et al. Pioglitazone delays proximal tubule dysfunction and improves cerebral vessel endothelial dysfunction in normoalbuminuric people with type 2 diabetes mellitus. *Diabetes Res Clin Pract* 2011;**94**(1):22-32

**Philis-Tsimikas 2013**

Philis-Tsimikas A, Del Prato S, Satman I, et al. Effect of insulin degludec versus sitagliptin in patients with type 2 diabetes uncontrolled on oral antidiabetic agents. *Diabetes Obes Metab* 2013;**15**(8):760-66

**Phillips 2001**

Phillips LS, Grunberger G, Miller E, et al. Once- and twice-daily dosing with rosiglitazone improves glycemic control in patients with type 2 diabetes. *Diabetes Care* 2001;**24**(2):308-15

**Phillips 2003**

Phillips P, Karrasch J, Scott R, et al. Acarbose improves glycemic control in overweight type 2 diabetic patients insufficiently treated with metformin. *Diabetes Care* 2003;**26**(2):269-73

**Phrommintikul 2019**

Phrommintikul A, Wongcharoen W, Kumfu S, et al. Effects of dapagliflozin vs vildagliptin on cardiometabolic parameters in diabetic patients with coronary artery disease: a randomised study. *British Journal of Clinical Pharmacology* 2019;**85**(6):1337-47

**PIOCOMB**

Hanefeld M, Pfützner A, Forst T, et al. Double-blind, randomized, multicentre, and active comparator controlled investigation of the effect of pioglitazone, metformin, and the combination of both on cardiovascular risk in patients with type 2 diabetes receiving stable basal insulin therapy: the PIOCOMB study. *Cardiovasc Diabetol* 2011;**10**:65

**PIOfix**

Pfützner A, Schöndorf T, Tschöpe D, et al. PIOfix-study: effects of pioglitazone/metformin fixed combination in comparison with a combination of metformin with glimepiride on diabetic dyslipidemia. *Diabetes Technol Ther* 2011;**13**(6):637-43

**Pioglitazone 001 study**

Aronoff S, Rosenblatt S, Braithwaite S, et al. Pioglitazone hydrochloride monotherapy improves glycemic control in the treatment of patients with type 2 diabetes: a 6-month randomized placebo-controlled dose-response study. The Pioglitazone 001 Study Group. *Diabetes Care* 2000;**23**(11):1605-11

**PIONEER**

Pfützner A, Marx N, Lübben G, et al. Improvement of cardiovascular risk markers by pioglitazone is independent from glycemic control: results from the pioneer study. *J Am Coll Cardiol* 2005;**45**(12):1925-31

**PIONEER 1**



Aroda VR, Rosenstock J, Terauchi Y, et al. PIONEER 1: Randomized Clinical Trial of the Efficacy and Safety of Oral Semaglutide Monotherapy in Comparison With Placebo in Patients With Type 2 Diabetes. *Diabetes Care* 2019;**42**(9):1724-32

#### **PIONEER 2**

Rodbard HW, Rosenstock J, Canani LH, et al. Oral Semaglutide Versus Empagliflozin in Patients With Type 2 Diabetes Uncontrolled on Metformin: The PIONEER 2 Trial. *Diabetes Care* 2019;**42**(12):2272-81

#### **PIONEER 3**

Rosenstock J, Allison D, Birkenfeld AL, et al. Effect of Additional Oral Semaglutide vs Sitagliptin on Glycated Hemoglobin in Adults with Type 2 Diabetes Uncontrolled with Metformin Alone or with Sulfonylurea: The PIONEER 3 Randomized Clinical Trial. *JAMA - Journal of the American Medical Association* 2019;**321**(15):1466-80

#### **PIONEER 4**

Pratley R, Amod A, Hoff ST, et al. Oral semaglutide versus subcutaneous liraglutide and placebo in type 2 diabetes (PIONEER 4): a randomised, double-blind, phase 3a trial. *The Lancet* 2019;**394**(10192):39-50

#### **PIONEER 5**

Blicher TM, Rosenlund S, Eriksson JW, et al. Efficacy and safety of oral semaglutide in patients with type 2 diabetes and moderate renal impairment (PIONEER 5): a placebo-controlled, randomised, phase 3a trial. *The Lancet Diabetes and Endocrinology* 2019;**7**(7):515-27

#### **PIONEER 6**

Husain M, Birkenfeld AL, Donsmark M, et al. Oral semaglutide and cardiovascular outcomes in patients with type 2 diabetes. *New England Journal of Medicine* 2019;**381**(9):841-51

#### **PIONEER 7**

Pieber TR, Bode B, Mertens A, et al. Efficacy and safety of oral semaglutide with flexible dose adjustment versus sitagliptin in type 2 diabetes (PIONEER 7): a multicentre, open-label, randomised, phase 3a trial. *The Lancet Diabetes and Endocrinology* 2019;**7**(7):528-39

#### **PIONEER 8**

Zinman B, Aroda VR, Buse JB, et al. Efficacy, safety, and tolerability of oral semaglutide versus placebo added to insulin with or without metformin in patients with type 2 diabetes: The PIONEER 8 Trial. *Diabetes Care* 2019;**42**(12):2262-71

#### **PIONEER 9**

Katagiri H, Deenadayalan S, Navarria A, et al. Dose-response, efficacy, and safety of oral semaglutide monotherapy in Japanese patients with type 2 diabetes (PIONEER 9): a 52-week, phase 2/3a, randomised, controlled trial. *Lancet Diabetes Endocrinol* 2020;**8**(5):377-91

#### **PioRAGE**

Koyama H, Tanaka S, Monden M, et al. Comparison of effects of pioglitazone and glimepiride on plasma soluble RAGE and RAGE expression in peripheral mononuclear cells in type 2 diabetes: Randomized controlled trial (PioRAGE). *Atherosclerosis* 2014;**234**(2):329-34

#### **PIRAMID**

van der Meer RW, Rijzewijk LJ, Jong HW, et al. Pioglitazone improves cardiac function and alters myocardial substrate metabolism without affecting cardiac triglyceride accumulation and high-energy phosphate metabolism in patients with well-controlled type 2 diabetes mellitus. *Circulation* 2009;**119**(15):2069-77

**Pistrosch 2012**

Pistrosch F, Passauer J, Herbrig K, et al. Effect of thiazolidinedione treatment on proteinuria and renal hemodynamic in type 2 diabetic patients with overt nephropathy. *Horm Metab Res* 2012;**44**(12):914-8

**Pistrosch 2013**

Pistrosch F, Köhler C, Schaper F, et al. Effects of insulin glargine versus metformin on glycemic variability, microvascular and beta-cell function in early type 2 diabetes. *Acta Diabetol* 2013;**50**(4):587-95

**Pi-Sunyer 2007**

Pi-Sunyer FX, Schweizer A, Mills D, et al. Efficacy and tolerability of vildagliptin monotherapy in drug-naïve patients with type 2 diabetes. *Diabetes Res Clin Pract* 2007;**76**(1):132-8

**Pop-Busui 2009**

Pop-Busui R, Oral E, Raffel D, et al. Impact of rosiglitazone and glyburide on nitrosative stress and myocardial blood flow regulation in type 2 diabetes mellitus. *Metabolism* 2009;**58**(7):989-94

**POPPS**

Takagi T, Okura H, Kobayashi Y, et al. A prospective, multicenter, randomized trial to assess efficacy of pioglitazone on in-stent neointimal suppression in type 2 diabetes: POPPS (Prevention of In-Stent Neointimal Proliferation by Pioglitazone Study). *JACC Cardiol Intv* 2009;**2**(6):524-31

**Pratley 2014**

Pratley RE, Fleck P, Wilson C. Efficacy and safety of initial combination therapy with alogliptin plus metformin versus either as monotherapy in drug-naive patients with type 2 diabetes: A randomized, double-blind, 6-month study. *Diabetes Obes Metab* 2014;**16**(7):613-21

**PRESERVE-BETA**

Gerich J, Raskin P, Jean-Louis L, et al. PRESERVE-beta: two-year efficacy and safety of initial combination therapy with nateglinide or glyburide plus metformin. *Diabetes Care* 2005;**28**(9):2093-9

**PREVENT-J**

Hirukawa H, Hashiramoto M, Tanizawa Y, et al. Remission of hyperglycemia after withdrawal of oral antidiabetic drugs in Japanese patients with early-stage type 2 diabetes. *Journal of Diabetes Investigation* 2018;**9**(5):1119-27

**PRIDE**

Tanaka A, Komukai S, Shibata Y, et al. Effect of pioglitazone on cardiometabolic profiles and safety in patients with type 2 diabetes undergoing percutaneous coronary artery intervention: a prospective, multicenter, randomized trial. *Heart and vessels* 2018;**33**(9):965-77

**PRIME V**

Koshizaka M, Ishikawa K, Ishibashi R, et al. Comparing the effects of ipragliflozin versus metformin on visceral fat reduction and metabolic dysfunction in Japanese patients with type 2

diabetes treated with sitagliptin: A prospective, multicentre, open-label, blinded-endpoint, randomized controlled study (PRIME-V study). *Diabetes, obesity & metabolism* 2019;**21**(8):1990-95

#### **PRISMA**

Genovese S, Passaro A, Brunetti P, et al. Pioglitazone randomised Italian study on metabolic syndrome (PRISMA): Effect of pioglitazone with metformin on HDL-C levels in type 2 diabetic patients. *J Endocrinol Invest* 2013;**36**(8):606-16

#### **PROActive**

Dormandy JA, Charbonnel B, Eckland DJ, et al. Secondary prevention of macrovascular events in patients with type 2 diabetes in the PROActive Study (PROspective pioglitAzone Clinical Trial In macroVascular Events): a randomised controlled trial. *Lancet* 2005;**366**(9493):1279-89

#### **PROLOGUE**

Oyama J, Murohara T, Kitakaze M, et al. The effect of sitagliptin on carotid artery atherosclerosis in type 2 diabetes: The PROLOGUE Randomized Controlled Trial. *PLoS Med* 2016;**13**(6):e1002051

#### **QUARTER**

Schernthaner G, Matthews DR, Charbonnel B, et al. Efficacy and safety of pioglitazone versus metformin in patients with type 2 diabetes mellitus: a double-blind, randomized trial. *J Clin Endocrinol Metab* 2004;**89**(12):6068-76

#### **Quatraro 1986**

Quatraro A, Consoli G, Ceriello A, et al. Combined insulin and sulfonylurea therapy in non-insulin-dependent diabetics with secondary failure to oral drugs: a one year follow-up. *Diabetes Metab* 1986;**12**(6):315-8

#### **Raghuveer 2020**

Raghuveer B, Netaji N. Efficacy of teneligliptin with metformin in type 2 diabetes mellitus patients. *National Journal of Physiology, Pharmacy and Pharmacology* 2020;**10**(8):663-66

#### **Rahman 2010**

Rahman S, Ismail A-S, Ismail SB, et al. Effect of rosiglitazone and ramipril on macrovasculopathy in patients with type 2 diabetes: Needs longer treatment and/or higher doses? *Clin Pharmacol Adv App* 2010;**2**(1):83-7

#### **Rahman 2011**

Rahman IU, Malik SA, Bashir M, et al. Monotherapy with metformin or glimepiride and changes in serum sialic acid in type 2 diabetes mellitus. *Br J Diabetes Vasc Dis* 2011;**11**(3):137-40

#### **Raji 2018**

Raji A, Scott R, Morgan J, et al. Safety and efficacy of sitagliptin compared with dapagliflozin in patients with type 2 diabetes, mild renal impairment, and inadequate glycaemic control on metformin +/- a sulfonylurea. *Diabetologia* 2018;**61**(Supplement 1):S379-S80

#### **Raskin 2001**

Raskin P, Rendell M, Riddle MC, et al. A randomized trial of rosiglitazone therapy in patients with inadequately controlled insulin-treated type 2 diabetes. *Diabetes Care* 2001;**24**(7):1226-32

**Raskin 2004**

Raskin P, McGill J, Saad MF, et al. Combination therapy for type 2 diabetes: repaglinide plus rosiglitazone. *Diabetic Med* 2004;**21**(4):329-35

**Raskin 2009**

Raskin P, Lewin A, Reinhardt R, et al. Twice-daily dosing of a repaglinide/metformin fixed-dose combination tablet provides glycaemic control comparable to rosiglitazone/metformin tablet. *Diabetes Obes Metab* 2009;**11**(9):865-73

**Raz 2008**

Raz I, Chen Y, Wu M, et al. Efficacy and safety of sitagliptin added to ongoing metformin therapy in patients with type 2 diabetes. *Curr Med Res Opin* 2008;**24**(2):537-50

**RECORD**

Home PD, Pocock SJ, Beck-Nielsen H, et al. Rosiglitazone evaluated for cardiovascular outcomes in oral agent combination therapy for type 2 diabetes (RECORD): a multicentre, randomised, open-label trial. *Lancet* 2009;**373**(9681):2125-35

**REFORM**

Singh JSS, Mordi IR, Vickneson K, et al. Dapagliflozin versus placebo on left ventricular remodeling in patients with diabetes and heart failure: The REFORM Trial. *Diabetes Care* 2020;**43**(6):1356-59

**REGO-F**

Terawaki Y, Iwaya C, Nomiya T, et al. Efficacy and safety of a combination of an insulin secretagogue and a dipeptidyl peptidase-4 inhibitor in Japanese patients with type 2 diabetes mellitus; the repaglinide glucose oscillation study in Fukuoka (REGO-F). *Diabetol Int* 2020

**RELEASE**

de Boer SA, Heerspink HJL, Juarez Orozco LE, et al. Effect of linagliptin on pulse wave velocity in early type 2 diabetes: A randomized, double-blind, controlled 26-week trial (RELEASE). *Diabetes Obes Metab* 2017;**19**(8):1147-54

**RESULT**

Rosenstock J, Goldstein BJ, Vinik AI, et al. Effect of early addition of rosiglitazone to sulphonylurea therapy in older type 2 diabetes patients (>60 years): the Rosiglitazone Early vs. SULphonylurea Titration (RESULT) study. *Diabetes Obes Metab* 2006;**8**(1):49-57

**REWIND**

Gerstein HC, Colhoun HM, Dagenais GR, et al. Dulaglutide and renal outcomes in type 2 diabetes: an exploratory analysis of the REWIND randomised, placebo-controlled trial. *Lancet* 2019;**394**(10193):131-38

**Reynolds 2002**

Reynolds LR, Konz EC, Frederich RC, et al. Rosiglitazone amplifies the benefits of lifestyle intervention measures in long-standing type 2 diabetes mellitus. *Diabetes Obes Metab* 2002;**4**(4):270-5

**Reynolds 2007**

Reynolds LR, Kingsley FJ, Karounos DG, et al. Differential effects of rosiglitazone and insulin glargine on inflammatory markers, glycemic control, and lipids in type 2 diabetes. *Diabetes Res Clin Pract* 2007;**77**(2):180-7

**Ristic 2006**

Ristic S, Collober-Maugeais C, Pecher E, et al. Comparison of nateglinide and gliclazide in combination with metformin, for treatment of patients with Type 2 diabetes mellitus inadequately controlled on maximum doses of metformin alone. *Diabetic Med* 2006;**23**(7):757-62

**Robbins 2007**

Robbins DC, Beisswenger PJ, Ceriello A, et al. Mealtime 50/50 basal + prandial insulin analogue mixture with a basal insulin analogue, both plus metformin, in the achievement of target HbA1c and pre- and postprandial blood glucose levels in patients with type 2 diabetes: a multinational, 24-week, randomized, open-label, parallel-group comparison. *Clin Ther* 2007;**29**(11):2349-64

**Roberts 2005**

Roberts VL, Stewart J, Issa M, et al. Triple therapy with glimepiride in patients with type 2 diabetes mellitus inadequately controlled by metformin and a thiazolidinedione: results of a 30-week, randomized, double-blind, placebo-controlled, parallel-group study. *Clin Ther* 2005;**27**(10):1535-47

**Rodbard 2016**

Rodbard HW, Seufert J, Aggarwal N, et al. Efficacy and safety of titrated canagliflozin in patients with type 2 diabetes mellitus inadequately controlled on metformin and sitagliptin. *Diabetes Obes Metab* 2016;**18**(8):812-19

**Rosenstock 1998**

Rosenstock J, Brown A, Fischer J, et al. Efficacy and safety of acarbose in metformin-treated patients with type 2 diabetes. *Diabetes Care* 1998;**21**(12):2050-5

**Rosenstock 2006**

Rosenstock J, Rood J, Cobitz A, et al. Initial treatment with rosiglitazone/metformin fixed-dose combination therapy compared with monotherapy with either rosiglitazone or metformin in patients with uncontrolled type 2 diabetes. *Diabetes Obes Metab* 2006;**8**(6):650-60

**Rosenstock 2007**

Rosenstock J, Baron MA, Dejager S, et al. Comparison of vildagliptin and rosiglitazone monotherapy in patients with type 2 diabetes: a 24-week, double-blind, randomized trial. *Diabetes Care* 2007;**30**(2):217-23

**Rosenstock 2007a**

Rosenstock J, Kim SW, Baron MA, et al. Efficacy and tolerability of initial combination therapy with vildagliptin and pioglitazone compared with component monotherapy in patients with type 2 diabetes. *Diabetes Obes Metab* 2007;**9**(2):175-85

**Rosenstock 2009**

Rosenstock J, Rendell MS, Gross JL, et al. Alogliptin added to insulin therapy in patients with type 2 diabetes reduces HbA(1C) without causing weight gain or increased hypoglycaemia. *Diabetes Obes Metab* 2009;**11**(12):1145-52

**Rosenstock 2010**

Rosenstock J, Inzucchi SE, Seufert J, et al. Initial combination therapy with alogliptin and pioglitazone in drug-naïve patients with type 2 diabetes. *Diabetes Care* 2010;**33**(11):2406-8

**Rosenstock 2012**

Rosenstock J, Vico M, Wei L, et al. Effects of dapagliflozin, an SGLT2 inhibitor, on HbA(1c), body weight, and hypoglycemia risk in patients with type 2 diabetes inadequately controlled on pioglitazone monotherapy. *Diabetes Care* 2012;**35**(7):1473-8

**Rosenstock 2013**

Rosenstock J, Wilson C, Fleck P. Alogliptin versus glipizide monotherapy in elderly type 2 diabetes mellitus patients with mild hyperglycaemia: A prospective, double-blind, randomized, 1-year study. *Diabetes Obes Metab* 2013;**15**(10):906-14

**Rosenstock 2015**

Rosenstock J, Hansen L, Zee P, et al. Dual add-on therapy in type 2 diabetes poorly controlled with metformin monotherapy: a randomized double-blind trial of saxagliptin plus dapagliflozin addition versus single addition of saxagliptin or dapagliflozin to metformin. *Diabetes Care* 2015;**38**(3):376-83

**Rosenstock 2016**

Rosenstock J, Chuck L, Gonzalez-Ortiz M, et al. Initial combination therapy with canagliflozin plus metformin versus each component as monotherapy for drug-naïve type 2 diabetes. *Diabetes Care* 2016;**39**(3):353-62

**Rosenstock 2019**

Rosenstock J, Perl S, Johnsson E, et al. Triple therapy with low-dose dapagliflozin plus saxagliptin versus dual therapy with each monocomponent, all added to metformin, in uncontrolled type 2 diabetes. *Diabetes, Obesity & Metabolism* 2019;**21**(9):2152-62

**Ross 2015**

Ross SA, Caballero AE, Del Prato S, et al. Initial combination of linagliptin and metformin compared with linagliptin monotherapy in patients with newly diagnosed type 2 diabetes and marked hyperglycaemia: A randomized, double-blind, active-controlled, parallel group, multinational clinical trial. *Diabetes Obes Metab* 2015;**17**(2):136-44

**SAIS1**

Furumoto T, Oba K, Tsutsui H, et al. A randomized controlled trial comparing the effects of sitagliptin and glimepiride on endothelial function and metabolic parameters: Sapporo athero-incretin study 1 (SAIS1). *PLoS ONE* 2016;**11**(10):e0164255

**Saleem 2011**

Saleem K, Yasin MA, Asrar A, et al. Comparison of repaglinide with glibenclamide in the reduction of HbA1C of type 2 diabetic patients. *Pakistan J Med Health Sci* 2011;**5**(1):23-6

**Salman 2001**

Salman S, Salman F, Satman I, et al. Comparison of acarbose and gliclazide as first-line agents in patients with type 2 diabetes. *Curr Med Res Opin* 2001;**16**(4):296-306

**Saloranta 2002**

Saloranta C, Hershon K, Ball M, et al. Efficacy and safety of nateglinide in type 2 diabetic patients with modest fasting hyperglycemia. *J Clin Endocrinol Metab* 2002;**87**(9):4171-6

**Samson 2011**

Samson SL, Sathyanarayana P, Jogi M, et al. Exenatide decreases hepatic fibroblast growth factor 21 resistance in non-alcoholic fatty liver disease in a mouse model of obesity and in a randomised controlled trial. *Diabetologia* 2011;**54**(12):3093-100

**Sato 2018**

Sato T, Aizawa Y, Yauasa S, et al. The effect of dapagliflozin treatment on epicardial adipose tissue volume. *Cardiovascular diabetology* 2018;**17**(1)

**SAVOR-TIMI 53**

Scirica BM, Bhatt DL, Braunwald E, et al. Saxagliptin and cardiovascular outcomes in patients with type 2 diabetes mellitus. *N Engl J Med* 2013;**369**(14):1317-26

**Saxagliptin 014 Study**

DeFronzo RA, Hissa MN, Garber AJ, et al. The efficacy and safety of saxagliptin when added to metformin therapy in patients with inadequately controlled type 2 diabetes with metformin alone. *Diabetes Care* 2009;**32**(9):1649-55

**SCALE**

Davies MJ, Bergenstal R, Bode B, et al. Efficacy of liraglutide for weight loss among patients with type 2 diabetes: The SCALE diabetes randomized clinical trial. *JAMA* 2015;**314**(7):687-99

**Scherbaum 2002**

Scherbaum WA, Göke B. Metabolic efficacy and safety of once-daily pioglitazone monotherapy in patients with type 2 diabetes: a double-blind, placebo-controlled study. *Horm Metab Res* 2002;**34**(10):589-95

**Scherbaum 2008**

Scherbaum WA, Schweizer A, Mari A, et al. Efficacy and tolerability of vildagliptin in drug-naive patients with type 2 diabetes and mild hyperglycaemia. *Diabetes Obes Metab* 2008;**10**(8):675-82

**Schweizer 2007**

Schweizer A, Couturier A, Foley JE, et al. Comparison between vildagliptin and metformin to sustain reductions in HbA1c over 1 year in drug-naive patients with Type 2 diabetes. *Diabet Med* 2007;**24**(9):955-61

**Schweizer 2009**

Schweizer A, Dejager S, Bosi E. Comparison of vildagliptin and metformin monotherapy in elderly patients with type 2 diabetes: a 24-week, double-blind, randomized trial. *Diabetes Obes Metab* 2009;**11**(8):804-12

**Segal 1997**

Segal P, Feig PU, Schernthaner G, et al. The efficacy and safety of miglitol therapy compared with glibenclamide in patients with NIDDM inadequately controlled by diet alone. *Diabetes Care* 1997;**20**(5):687-91

**Segal 2005**

Segal P, Eliahou HE, Petzinna D, et al. Long-term efficacy and tolerability of acarbose treatment in patients with type 2 diabetes mellitus. *Clin Drug Invest* 2005;**25**(9):589-95

**Seino 2011**

Seino Y, Rasmussen MF, Nishida T, et al. Glucagon-like peptide-1 analog liraglutide in combination with sulfonylurea safely improves blood glucose measures vs sulfonylurea monotherapy in Japanese patients with type 2 diabetes: Results of a 52-week, randomized, multicenter trial. *J Diabetes Invest* 2011;**2**(4):280-86

**Seino 2014**

Seino Y, Sasaki T, Fukatsu A, et al. Efficacy and safety of luseogliflozin as monotherapy in Japanese patients with type 2 diabetes mellitus: A randomized, double-blind, placebo-controlled, phase 3 study. *Curr Med Res Opin* 2014;**30**(7):1245-55

**Seino 2015**

Seino Y, Inagaki N, Haneda M, et al. Efficacy and safety of luseogliflozin added to various oral antidiabetic drugs in Japanese patients with type 2 diabetes mellitus. *J Diabetes Invest* 2015;**6**(4):443-53

**Seino 2016**

Seino Y, Kaneko S, Fukuda S, et al. Combination therapy with liraglutide and insulin in Japanese patients with type 2 diabetes: A 36-week, randomized, double-blind, parallel-group trial. *J Diabetes Invest* 2016;**7**(4):565-73

**Seino 2018**

Seino Y, Terauchi Y, Osonoi T, et al. Safety and efficacy of semaglutide once weekly vs sitagliptin once daily, both as monotherapy in Japanese people with type 2 diabetes. *Diabetes, Obesity and Metabolism* 2018;**20**(2):378-88

**Shaddinger 2019**

Shaddinger BC, Soffer J, Vlasakakis G, et al. Efficacy and safety of an albiglutide liquid formulation compared with the lyophilized formulation: A 26-week randomized, double-blind, repeat-dose study in patients with type 2 diabetes mellitus. *Diabetes Research and Clinical Practice* 2019;**152**:125-34

**Shah 2011**

Shah ZH, Saleem K, Mahboob F, et al. A comparative study of repaglinide and glibenclamide in type 2 diabetic patients. *Pakistan Journal of Medical and Health Sciences* 2011;**5**(3):476-9

**Shankar 2017**

Shankar RR, Bao Y, Han P, et al. Sitagliptin added to stable insulin therapy with or without metformin in Chinese patients with type 2 diabetes. *J Diabetes Invest* 2017;**8**(3):321-29

**Shankar 2017a**

Shankar RR, Inzucchi SE, Scarabello V, et al. A randomized clinical trial evaluating the efficacy and safety of the once-weekly dipeptidyl peptidase-4 inhibitor omarigliptin in patients with type 2 diabetes inadequately controlled on metformin monotherapy. *Curr Med Res Opin* 2017;**33**(10):1853-60

**Shestakova 2018**



Shestakova MV, Wilding JPH, Wilpshaar W, et al. A phase 3 randomized placebo-controlled trial to assess the efficacy and safety of ipragliflozin as an add-on therapy to metformin in Russian patients with inadequately controlled type 2 diabetes mellitus. *Diabetes Research and Clinical Practice* 2018;**146**:240-50

#### **Shibuya 2018**

Shibuya T, Fushimi N, Kawai M, et al. Luseogliflozin improves liver fat deposition compared to metformin in type 2 diabetes patients with non-alcoholic fatty liver disease: A prospective randomized controlled pilot study. *Diabetes, Obesity and Metabolism* 2018;**20**(2):438-42

#### **SIMPLE**

Abreu M, Tumyan A, Elhassan A, et al. A randomized trial comparing the efficacy and safety of treating patients with type 2 diabetes and highly elevated HbA1c levels with basal-bolus insulin or a glucagon-like peptide-1 receptor agonist plus basal insulin: The SIMPLE study. *Diabetes, Obesity & Metabolism* 2019;**21**(9):2133-41

#### **Sit2Mix Trial**

Linjawi S, Sothiratnam R, Sari R, et al. The study of once- and twice-daily biphasic insulin aspart 30 (BIAsp 30) with sitagliptin, and twice-daily BIAsp 30 without sitagliptin, in patients with type 2 diabetes uncontrolled on sitagliptin and metformin - The Sit2Mix trial. *Primary Care Diabetes* 2015;**9**(5):370-76

#### **Sitagliptin Study 019**

Rosenstock J, Brazg R, Andryuk PJ, et al. Efficacy and safety of the dipeptidyl peptidase-4 inhibitor sitagliptin added to ongoing pioglitazone therapy in patients with type 2 diabetes: a 24-week, multicenter, randomized, double-blind, placebo-controlled, parallel-group study. *Clin Ther* 2006;**28**(10):1556-68

#### **Sitagliptin Study 020**

Charbonnel B, Karasik A, Liu J, et al. Efficacy and safety of the dipeptidyl peptidase-4 inhibitor sitagliptin added to ongoing metformin therapy in patients with type 2 diabetes inadequately controlled with metformin alone. *Diabetes Care* 2006;**29**(12):2638-43

#### **Sitagliptin Study 021**

Aschner P, Kipnes MS, Lunceford JK, et al. Effect of the dipeptidyl peptidase-4 inhibitor sitagliptin as monotherapy on glycemic control in patients with type 2 diabetes. *Diabetes Care* 2006;**29**(12):2632-7

#### **Sitagliptin study 024**

Seck T, Nauck M, Sheng D, et al. Safety and efficacy of treatment with sitagliptin or glipizide in patients with type 2 diabetes inadequately controlled on metformin: a 2-year study. *Int J Clin Pract* 2010;**64**(5):562-76

#### **Sitagliptin Study 035**

Hermansen K, Kipnes M, Luo E, et al. Efficacy and safety of the dipeptidyl peptidase-4 inhibitor, sitagliptin, in patients with type 2 diabetes mellitus inadequately controlled on glimepiride alone or on glimepiride and metformin. *Diabetes Obes Metab* 2007;**9**(5):733-45

#### **Sitagliptin Study 036**

Goldstein BJ, Feinglos MN, Lunceford JK, et al. Effect of initial combination therapy with sitagliptin, a dipeptidyl peptidase-4 inhibitor, and metformin on glycemic control in patients with type 2 diabetes. *Diabetes Care* 2007;**30**(8):1979-87

**Sitagliptin Study 049**

Aschner P, Katzeff HL, Guo H, et al. Efficacy and safety of monotherapy of sitagliptin compared with metformin in patients with type 2 diabetes. *Diabetes Obes Metab* 2010;**12**(3):252-61

**Sitagliptin Study 051**

Vilsbøll T, Rosenstock J, Yki-Järvinen H, et al. Efficacy and safety of sitagliptin when added to insulin therapy in patients with type 2 diabetes. *Diabetes Obes Metab* 2010;**12**(2):167-77

**SMART**

Du J, Liang L, Fang H, et al. Efficacy and safety of saxagliptin compared with acarbose in Chinese patients with type 2 diabetes mellitus uncontrolled on metformin monotherapy: Results of a Phase IV open-label randomized controlled study (the SMART study). *Diabetes, Obesity and Metabolism* 2017;**19**(11):1513-20

**Smith 2005**

Smith SR, Jonge L, Volaufova J, et al. Effect of pioglitazone on body composition and energy expenditure: a randomized controlled trial. *Metabolism* 2005;**54**(1):24-32

**Softeland 2017**

Softeland E, Meier JJ, Vangen B, et al. Empagliflozin as add-on therapy in patients with type 2 diabetes inadequately controlled with linagliptin and metformin: A 24-week randomized, double-blind, parallel-group trial. *Diabetes Care* 2017;**40**(2):201-09

**Sohn 2008**

Sohn TS, Lee JJ, Kim IJ, et al. The effect of rosiglitazone and metformin therapy, as an initial therapy, in patients with type 2 diabetes mellitus. *Korean Diabetes J* 2008;**32**(5):445-52

**Sone 2019**

Sone H, Kaneko T, Shiki K, et al. Efficacy and safety of empagliflozin as add-on to insulin in Japanese patients with type 2 diabetes: a randomised, double-blind, placebo-controlled trial. *Diabetes Obes Metab* 2019

**South Danish Diabetes Study**

Gram J, Henriksen JE, Grodum E, et al. Pharmacological treatment of the pathogenetic defects in type 2 diabetes: the randomized multicenter South Danish Diabetes Study. *Diabetes Care* 2011;**34**(1):27-33

**SPEAD-A**

Mita T, Katakami N, Yoshii H, et al. Alogliptin, a Dipeptidyl Peptidase 4 Inhibitor, Prevents the Progression of Carotid Atherosclerosis in Patients with Type 2 Diabetes: The Study of Preventive Effects of Alogliptin on Diabetic Atherosclerosis (SPEAD-A). *Diabetes Care* 2016;**39**(1):139-48

**SPECIFY study**

Gu T, Zhu L, Niu Q, et al. Efficacy and safety of saxagliptin and glimepiride in patients with type 2 diabetes inadequately controlled with metformin monotherapy: Results from the SPECIFY study. *Diabetologia* 2018;**61**(Supplement 1):S379

**Spengler 1989**

Spengler N, Hansel G. Efficacy of 6 months monotherapy with glucosidase inhibitor acarbose versus sulphonylurea glibenclamid on metabolic control of dietary treated type II diabetics abstract. Eur J Clin Invest 1989;**19**((2 Pt II)):A71

**SPIKE**

Mita T, Katakami N, Shiraiwa T, et al. Sitagliptin attenuates the progression of carotid intima-media thickening in insulin-treated patients with type 2 diabetes: The sitagliptin preventive study of intima-media thickness evaluation (SPIKE): A randomized controlled trial. Diabetes Care 2016;**39**(3):455-64

**SPOTLIGHT**

Kashiwagi A, Shiga T, Akiyama N, et al. Efficacy and safety of ipragliflozin as an add-on to pioglitazone in Japanese patients with inadequately controlled type 2 diabetes: a randomized, double-blind, placebo-controlled study (the SPOTLIGHT study). Diabetol Int 2015;**6**(2):104-16

**SPREAD-DIMCAD**

Hong J, Zhang Y, Lai S, et al. Effects of metformin versus glipizide on cardiovascular outcomes in patients with type 2 diabetes and coronary artery disease. Diabetes Care 2013;**36**(5):1304-11

**Sridhar 2013**

Sridhar S, Walia R, Sachdeva N, et al. Effect of pioglitazone on testosterone in eugonadal men with type 2 diabetes mellitus: a randomized double-blind placebo-controlled study. Clin Endocrinol 2013;**78**(3):454-9

**St. John Sutton 2002**

St. John Sutton M, Rendell M, Dandona P, et al. A comparison of the effects of rosiglitazone and glyburide on cardiovascular function and glycaemic control in patients with type 2 diabetes. Diabetes Care 2002;**25**(11):2058-64

**Standl 1999**

Standl E, Baumgartl HJ, Füchtenbusch M, et al. Effect of acarbose on additional insulin therapy in type 2 diabetic patients with late failure of sulphonylurea therapy. Diabetes Obes Metab 1999;**1**(4):215-20

**Standl 2001**

Standl E, Schernthaner G, Rybka J, et al. Improved glycaemic control with miglitol in inadequately-controlled type 2 diabetics. Diabetes Res Clin Pract 2001;**51**(3):205-13

**START**

Dou J, Ma J, Liu J, et al. Efficacy and safety of saxagliptin in combination with metformin as initial therapy in Chinese patients with type 2 diabetes: Results from the START study, a multicentre, randomized, double-blind, active-controlled, phase 3 trial. Diabetes, Obesity and Metabolism 2018;**20**(3):590-98

**START-J**

Terauchi Y, Yamada Y, Ishida H, et al. Efficacy and safety of sitagliptin as compared with glimepiride in Japanese patients with type 2 diabetes mellitus aged >60 years (START-J trial). Diabetes Obes Metab 2017;**19**:1188-92

**Stewart 2006**

Stewart MW, Cirkel DT, Furuseth K, et al. Effect of metformin plus rosiglitazone compared with metformin alone on glycaemic control in well-controlled Type 2 diabetes. *Diabet Med* 2006;**23**(10):1069-78

**Stocker 2007**

Stocker DJ, Taylor AJ, Langley RW, et al. A randomized trial of the effects of rosiglitazone and metformin on inflammation and subclinical atherosclerosis in patients with type 2 diabetes. *Am Heart J* 2007;**153**(3):445.e1-6

**STOP-OB**

Kitazawa T, Seino H, Ohashi H, et al. Comparison of tofogliflozin versus glimepiride as the third oral agent added to metformin plus a dipeptidyl peptidase-4 inhibitor in Japanese patients with type 2 diabetes: A randomized, 24-week, open-label, controlled trial (STOP-OB). *Diabetes Obes Metab* 2020;**22**:1659-63

**Strojek 2009**

Strojek K, Bebakar WM, Khutsoane DT, et al. Once-daily initiation with biphasic insulin aspart 30 versus insulin glargine in patients with type 2 diabetes inadequately controlled with oral drugs: an open-label, multinational RCT. *Curr Med Res Opin* 2009;**25**(12):2887-94

**Strojek 2011**

Strojek K, Yoon KH, Hrubá V, et al. Effect of dapagliflozin in patients with type 2 diabetes who have inadequate glycaemic control with glimepiride: a randomized, 24-week, double-blind, placebo-controlled trial. *Diabetes Obes Metab* 2011;**13**(10):928-38

**Strøm Halden 2019**

Strøm Halden TA, Kvitne KE, Midtvedt K, et al. Efficacy and safety of empagliflozin in renal transplant recipients with posttransplant diabetes mellitus. *Diabetes Care* 2019;**42**(6):1067-74

**Su 2014**

Su Y, Su YL, Lv LF, et al. A randomized controlled clinical trial of vildagliptin plus metformin combination therapy in patients with type II diabetes mellitus. *Exp Ther Med* 2014;**7**(4):799-803

**SUCCESS**

Yokoh H, Kobayashi K, Sato Y, et al. Efficacy and safety of the dipeptidyl peptidase-4 inhibitor sitagliptin compared with alpha-glucosidase inhibitor in Japanese patients with type 2 diabetes inadequately controlled on metformin or pioglitazone alone (Study for an Ultimate Combination Therapy to Control Diabetes with Sitagliptin-1): A multicenter, randomized, open-label, non-inferiority trial. *Journal of Diabetes Investigation* 2015;**6**(2):182-91

**SUMER**

Tamez-Perez HE, Grupo de Estudio Sumer. [Efficacy and safety of initial treatment with glimepiride versus sitagliptin in type 2 diabetes]. *Revista Medica del Instituto Mexicano del Seguro Social* 2015;**53**(2):142-8

**Sun 2006**

Sun Z, Ren X, Jin H, et al. Effect of pioglitazone on serum advanced glycosylation end product peptide and monocyte chemoattractant protein-1 in type 2 diabetic patients. *Jiangsu Medical Journal* 2006;**32**(2):101-3

#### **Sun 2016**

Sun W, Zeng C, Liao L, et al. Comparison of acarbose and metformin therapy in newly diagnosed type 2 diabetic patients with overweight and/or obesity. *Current Medical Research and Opinion* 2016;**32**(8):1389-96

#### **SUPER**

Chen Y, Liu X, Li Q, et al. Saxagliptin add-on therapy in Chinese patients with type 2 diabetes inadequately controlled by insulin with or without metformin: Results from the SUPER study, a randomized, double-blind, placebo-controlled trial. *Diabetes, obesity & metabolism* 2018;**20**(4):1044-49

#### **SUSTAIN 1**

Sorli C, Harashima SI, Tsoukas GM, et al. Efficacy and safety of once-weekly semaglutide monotherapy versus placebo in patients with type 2 diabetes (SUSTAIN 1): a double-blind, randomised, placebo-controlled, parallel-group, multinational, multicentre phase 3a trial. *Lancet Diabetes Endocrinol* 2017;**5**(4):251-60

#### **SUSTAIN 2**

Ahren B, Comas LM, Kumar H, et al. Efficacy and safety of once-weekly semaglutide vs. Sitagliptin as add-on to metformin and/or thiazolidinediones after 56 weeks in subjects with type 2 diabetes (SUSTAIN 2). *Diabetes* 2016;**65**(Supplement 1):A48

#### **SUSTAIN 2**

Ahrén B, Masmiquel L, Kumar H, et al. Efficacy and safety of once-weekly semaglutide versus once-daily sitagliptin as an add-on to metformin, thiazolidinediones, or both, in patients with type 2 diabetes (SUSTAIN 2): A 56-week, double-blind, phase 3a, randomised trial. *Lancet Diabetes Endocrinol* 2017;**5**(5):341-54

#### **SUSTAIN 4**

Aroda VR, Bain SC, Cariou B, et al. Efficacy and safety of once-weekly semaglutide versus once-daily insulin glargine as add-on to metformin (with or without sulfonylureas) in insulin-naive patients with type 2 diabetes (SUSTAIN 4): A randomised, open-label, parallel-group, multicentre, multinational, phase 3a trial. *Lancet Diabetes Endocrinol* 2017;**5**(5):355-66

#### **SUSTAIN 5**

Rodbard HW, Lingvay I, Reed J, et al. Semaglutide Added to Basal Insulin in Type 2 Diabetes (SUSTAIN 5): A Randomized, Controlled Trial. *Journal of Clinical Endocrinology and Metabolism* 2018;**103**(6):2291-301

#### **SUSTAIN 6**

Marso SP, Bain SC, Consoli A, et al. Semaglutide and cardiovascular outcomes in patients with type 2 diabetes. *N Engl J Med* 2016;**375**(19):1834-44

#### **SUSTAIN 8**

Lingvay I, Catarig AM, Frias JP, et al. Efficacy and safety of once-weekly semaglutide versus daily canagliflozin as add-on to metformin in patients with type 2 diabetes (SUSTAIN 8): a double-blind, phase 3b, randomised controlled trial. *Lancet Diabetes Endocrinol* 2019;**7**(11):834-44

**SUSTAIN 9**

Zinman B, Bhosekar V, Busch R, et al. Semaglutide once weekly as add-on to SGLT-2 inhibitor therapy in type 2 diabetes (SUSTAIN 9): a randomised, placebo-controlled trial. *The Lancet Diabetes & Endocrinology* 2019;**7**(5):356-67

**SUSTAIN - CHINA MRCT**

Nct. Efficacy and safety of semaglutide once-weekly versus sitagliptin once-daily as add-on to metformin in subjects with type 2 diabetes (SUSTAIN - CHINA MRCT).

<https://clinicaltrials.gov/show/nct03061214> 2017

**Suzuki 2014**

Suzuki K, Tanaka S, Aoki C, et al. Greater efficacy and improved endothelial dysfunction in untreated type 2 diabetes with liraglutide versus sitagliptin. *Dokkyo Journal of Medical Sciences* 2014;**41**(3):211-20

**SWIM**

Kesavadev J, Pillai PBS, Shankar A, et al. Sitagliptin 100 mg vs glimepiride 1-3 mg as an add-on to insulin and metformin in type 2 diabetes (SWIM). *Endocrine Connections* 2017;**6**(8):748-57

**Takagi 2003**

Takagi T, Yamamuro A, Tamita K, et al. Pioglitazone reduces neointimal tissue proliferation after coronary stent implantation in patients with type 2 diabetes mellitus: an intravascular ultrasound scanning study. *Am Heart J* 2003;**146**(2):E5

**Takase 2007**

Takase H, Nakazawa A, Yamashita S, et al. Pioglitazone produces rapid and persistent reduction of vascular inflammation in patients with hypertension and type 2 diabetes mellitus who are receiving angiotensin II receptor blockers. *Metabolism* 2007;**56**(4):559-64

**Takashima 2018**

Takashima H, Yoshida Y, Nagura C, et al. Renoprotective effects of canagliflozin, a sodium glucose cotransporter 2 inhibitor, in type 2 diabetes patients with chronic kidney disease: A randomized open-label prospective trial. *Diabetes and Vascular Disease Research* 2018;**15**(5):469-72

**Tao 2018**

Tao T, Wu P, Wang Y, et al. Comparison of glycemic control and beta-cell function in new onset T2DM patients with PCOS of metformin and saxagliptin monotherapy or combination treatment. *BMC Endocrine Disorders* 2018;**18**(1):14

**Taskinen 2011**

Taskinen MR, Rosenstock J, Tamminen I, et al. Safety and efficacy of linagliptin as add-on therapy to metformin in patients with type 2 diabetes: a randomized, double-blind, placebo-controlled study. *Diabetes Obes Metab* 2011;**13**(1):65-74

**TECOS**

Green JB, Bethel MA, Armstrong PW, et al. Effect of sitagliptin on cardiovascular outcomes in type 2 diabetes. *N Engl J Med* 2015;**373**(3):232-42

**T-Emerge 1**

Raz I, Fonseca V, Kipnes M, et al. Efficacy and safety of taspoglutide monotherapy in drug-naive type 2 diabetic patients after 24 weeks of treatment: results of a randomized, double-blind, placebo-controlled phase 3 study (T-Emerge 1). *Diabetes Care* 2012;**35**(3):485-7

### **T-Emerge 3**

Henry RR, Mudaliar S, Kanitra L, et al. Efficacy and safety of taspoglutide in patients with type 2 diabetes inadequately controlled with metformin plus pioglitazone over 24 weeks: T-Emerge 3 trial. *J Clin Endocrinol Metab* 2012;**97**(7):2370-9

### **T-Emerge 4**

Bergental RM, Forti A, Chiasson JL, et al. Efficacy and safety of taspoglutide versus sitagliptin for type 2 diabetes mellitus (T-Emerge 4 Trial). *Diabetes Ther* 2012;**3**(1):1-19

### **T-Emerge 5**

Nauck M, Horton E, Andjelkovic M, et al. Taspoglutide, a once-weekly glucagon-like peptide 1 analogue, vs. insulin glargine titrated to target in patients with Type 2 diabetes: an open-label randomized trial. *Diabetic Med* 2013;**30**(1):109-13

### **T-Emerge 6**

Pratley RE, Urosevic D, Boldrin M, et al. Efficacy and tolerability of taspoglutide versus pioglitazone in subjects with type 2 diabetes uncontrolled with sulphonylurea or sulphonylurea-metformin therapy: a randomized, double-blind study (T-emerge 6). *Diabetes Obes Metab* 2013;**15**(3):234-40

### **T-Emerge 7**

Hollander P, Lasko B, Barnett AH, et al. Effects of taspoglutide on glycemic control and body weight in obese patients with type 2 diabetes (T-Emerge 7 study). *Obesity* 2013;**21**(2):238-47

### **Teramoto 2007**

Teramoto T, Yamada N, Shirai K, et al. Effects of pioglitazone hydrochloride on Japanese patients with type 2 diabetes mellitus. *J Atheroscler Thromb* 2007;**14**(2):86-93

### **Teupe 1991**

Teupe B, Bergis K. Prospective randomized two-years clinical study comparing additional metformin treatment with reducing diet in type 2 diabetes. *Diabète Metab* 1991;**17**(1 Pt 2):213-7

### **Thrasher 2014**

Thrasher J, Daniels K, Patel S, et al. Efficacy and safety of linagliptin in black/African American patients with type 2 diabetes: A 6-month, randomized, double-blind, placebo-controlled study. *Endocrine Pract* 2014;**20**(5):412-20

### **TIDE**

Punthakee Z, Bosch J, Dagenais G, et al. Design, history and results of the Thiazolidinedione Intervention with vitamin D Evaluation (TIDE) randomised controlled trial. *Diabetologia* 2012;**55**(1):36-45

### **Tinahones 2017**

Tinahones FJ, Gallwitz B, Nordaby M, et al. Linagliptin as add-on to empagliflozin and metformin in patients with type 2 diabetes: Two 24-week randomized, double-blind, double-dummy, parallel-group trials. *Diabetes Obes Metab* 2017;**19**(2):266-74

**Tofogliflozin 003**

Kaku K, Watada H, Iwamoto Y, et al. Efficacy and safety of monotherapy with the novel sodium/glucose cotransporter-2 inhibitor tofogliflozin in Japanese patients with type 2 diabetes mellitus: A combined Phase 2 and 3 randomized, placebo-controlled, double-blind, parallel-group comparative study. *Cardiovasc Diabetol* 2014;**13**(1):65

**Tolman 2009**

Tolman KG, Freston JW, Kupfer S, et al. Liver safety in patients with type 2 diabetes treated with pioglitazone: results from a 3-year, randomized, comparator-controlled study in the US. *Drug Safety* 2009;**32**(9):787-800

**TOPSCORE**

Kato Y, Iwata A, Zhang B, et al. Effects of dipeptidyl peptidase-4 inhibitor sitagliptin on coronary atherosclerosis as assessed by intravascular ultrasound in type 2 diabetes mellitus with coronary artery disease. *IJC Metab Endocr* 2017;**16**:1-9

**TOSCA.IT**

Vaccaro O, Masulli M, Nicolucci A, et al. Effects on the incidence of cardiovascular events of the addition of pioglitazone versus sulfonylureas in patients with type 2 diabetes inadequately controlled with metformin (TOSCA.IT): a randomised, multicentre trial. *The lancet Diabetes & endocrinology* 2017;**5**(11):887-97

**Tripathy 2013**

Tripathy D, Daniele G, Fiorentino TV, et al. Pioglitazone improves glucose metabolism and modulates skeletal muscle TIMP-3-TACE dyad in type 2 diabetes mellitus: A randomised, double-blind, placebo-controlled, mechanistic study. *Diabetologia* 2013;**56**(10):2153-63

**TROICA**

Ahn CH, Han KA, Yu JM, et al. Efficacy and safety of gemigliptin, a dipeptidyl peptidase-4 inhibitor, in patients with type 2 diabetes mellitus inadequately controlled with combination treatment of metformin and sulphonylurea: A 24-week, multicentre, randomized, double-blind, placebo-controlled study (TROICA study). *Diabetes Obes Metab* 2017;**19**(5):635-43

**Truitt 2010**

Truitt KE, Goldberg RB, Rosenstock J, et al. A 26-week, placebo- and pioglitazone-controlled, dose-ranging study of rivoglitazone, a novel thiazolidinedione for the treatment of type 2 diabetes. *Curr Med Res Opin* 2010;**26**(6):1321-31

**Türkmen Kemal 2007**

Türkmen Kemal Y, Güvener Demirag N, Yildirim A, et al. Effects of rosiglitazone on plasma brain natriuretic peptide levels and myocardial performance index in patients with type 2 diabetes mellitus. *Acta Diabetologica* 2007;**44**(3):149-56

**UKPDS 44**

Holman RR, Cull CA, Turner RC. A randomized double-blind trial of acarbose in type 2 diabetes shows improved glycemic control over 3 years (U.K. Prospective Diabetes Study 44). *Diabetes Care* 1999;**22**(6):960-4

**Umpierrez 2006**



Umpierrez G, Issa M, Vlahjanic A. Glimepiride versus pioglitazone combination therapy in subjects with type 2 diabetes inadequately controlled on metformin monotherapy: results of a randomized clinical trial. *Curr Med Res Opin* 2006;**22**(4):751-9

#### **Vähätalo 2007**

Vähätalo M, Rönnemaa T, Viikari J. Recognition of fasting or overall hyperglycaemia when starting insulin treatment in patients with type 2 diabetes in general practice. *Scand J Prim Health Care* 2007;**25**(3):147-53

#### **van Eyk 2019**

Van Eyk HJ, Paiman EHM, Bizino MB, et al. A double-blind, placebo-controlled, randomised trial to assess the effect of liraglutide on ectopic fat accumulation in South Asian type 2 diabetes patients. *Cardiovascular Diabetology* 2019;**18**(1):87

#### **Van Gaal 2014**

Van Gaal L, Souhami E, Zhou T, et al. Efficacy and safety of the glucagon-like peptide-1 receptor agonist lixisenatide versus the dipeptidyl peptidase-4 inhibitor sitagliptin in young (<50 years) obese patients with type 2 diabetes mellitus. *J Clin Transl Endocrinol* 2014;**1**(2):31-37

#### **Vanderheiden 2016**

Vanderheiden A, Harrison L, Warshauer J, et al. Effect of adding liraglutide vs placebo to a high-dose insulin regimen in patients with type 2 diabetes a randomized clinical trial. *JAMA Int Med* 2016;**176**(7):939-47

#### **Varghese 2009**

Varghese A, Yee MS, Chan CF, et al. Effect of rosiglitazone on progression of atherosclerosis: insights using 3D carotid cardiovascular magnetic resonance. *J Cardiovasc Magn Reson* 2009;**11**:24

#### **Veleba 2015**

Veleba J, Janovska P, Kuda O, et al. Combined intervention with pioglitazone and n-3 fatty acids in metformin-treated type 2 diabetic patients: Improvement of lipid metabolism. *Nutrition and Metabolism* 2015;**12**(1):52

#### **VERTIS Asia**

Ji L, Liu Y, Miao H, et al. Safety and efficacy of ertugliflozin in Asian patients with type 2 diabetes mellitus inadequately controlled with metformin monotherapy: VERTIS Asia. *Diabetes, Obesity & Metabolism* 2019;**21**(6):1474-82

#### **VERTIS CV**

McGuire DK, Cannon CP, Pratley R, et al. Design and baseline characteristics of the eValuation of ERTugliflozin efficacy and Safety CardioVascular outcomes trial (VERTIS-CV). *Diabetologia* 2018;**61**(Supplement 1):S305-S06

#### **VERTIS FACTORIAL**

Pratley RE, Eldor R, Raji A, et al. Ertugliflozin plus sitagliptin versus either individual agent over 52 weeks in patients with type 2 diabetes mellitus inadequately controlled with metformin: The VERTIS FACTORIAL randomized trial. *Diabetes, Obesity and Metabolism* 2018;**20**(5):1111-20

#### **VERTIS MET**

Charbonnel B, Pascu R, Frias J, et al. Efficacy and safety of ertugliflozin in patients with type 2 diabetes inadequately controlled with metformin monotherapy: VERTIS MET trial. *Diabetologia* 2017;**60**(1 Supplement 1):S406-S07

#### **VERTIS MONO**

Terra SG, Focht K, Davies M, et al. Phase III, efficacy and safety study of ertugliflozin monotherapy in people with type 2 diabetes mellitus inadequately controlled with diet and exercise alone. *Diabetes Obes Metab* 2017;**19**(5):721-28

#### **VERTIS RENAL**

Grunberger G, Camp S, Johnson J, et al. Ertugliflozin in patients with stage 3 chronic kidney disease and type 2 diabetes mellitus: The VERTIS RENAL Randomized Study. *Diabetes therapy* 2018;**9**(1):49-66

#### **VERTIS SITA2**

Dagogo-Jack S, Liu J, Eldor R, et al. Efficacy and safety of the addition of ertugliflozin in patients with type 2 diabetes mellitus inadequately controlled with metformin and sitagliptin: the VERTIS SITA2 placebo-controlled randomized study. *Diabetes, obesity & metabolism* 2018;**20**(3):530-40

#### **VERTIS SU**

Hollander P, Liu J, Hill J, et al. Ertugliflozin Compared with Glimepiride in Patients with Type 2 Diabetes Mellitus Inadequately Controlled on Metformin: the VERTIS SU Randomized Study. *Diabetes therapy* 2018;**9**(1):193-207

#### **Vianna 2017**

Vianna AGD, Lacerda CS, Pechmann LM, et al. A randomized controlled trial to compare the effects of sulphonylurea gliclazide MR (modified release) and the DPP-4 inhibitor vildagliptin on glycemic variability and control measured by continuous glucose monitoring (CGM) in Brazilian women with type 2 diabetes. *Diabetes Research and Clinical Practice* 2018;**139**:357-65

#### **VICTORY**

Bertrand OF, Poirier P, Rodés-Cabau J, et al. Cardiometabolic effects of rosiglitazone in patients with type 2 diabetes and coronary artery bypass grafts: A randomized placebo-controlled clinical trial. *Atherosclerosis* 2010;**211**(2):565-73

#### **VISION**

Ji LN, Pan CY, Lu JM, et al. Efficacy and safety of combination therapy with vildagliptin and metformin versus metformin uptitration in Chinese patients with type 2 diabetes inadequately controlled with metformin monotherapy: a randomized, open-label, prospective study (VISION). *Diabetes Obes Metab* 2016;**18**(8):775-82

#### **VIVIDD**

McMurray JJV, Ponikowski P, Bolli GB, et al. Effects of vildagliptin on ventricular function in patients with type 2 diabetes mellitus and heart failure: A randomized placebo-controlled trial. *JACC: Heart Failure* 2018;**6**(1):8-17

#### **Vongthavaravat 2002**

Vongthavaravat V, Wajchenberg BL, Waitman JN, et al. An international study of the effects of rosiglitazone plus sulphonylurea in patients with type 2 diabetes. *Curr Med Res Opin* 2002;**18**(8):456-61

**Wajcberg 2007**

Wajcberg E, Sriwijitkamol A, Musi N, et al. Relationship between vascular reactivity and lipids in Mexican-Americans with type 2 diabetes treated with pioglitazone. *J Clin Endocrinol Metab* 2007;**92**(4):1256-62

**Wang 2005**

Wang G, Wei J, Guan Y, et al. Peroxisome proliferator-activated receptor-gamma agonist rosiglitazone reduces clinical inflammatory responses in type 2 diabetes with coronary artery disease after coronary angioplasty. *Metabolism* 2005;**54**(5):590-7

**Wang 2013**

Wang H, Ni Y, Yang S, et al. The effects of gliclazide, metformin, and acarbose on body composition in patients with newly diagnosed type 2 diabetes mellitus. *Curr Ther Res Clin Exp* 2013;**75**:88-92

**Wang 2015**

Wang MM, Lin S, Chen YM, et al. Saxagliptin is similar in glycaemic variability more effective in metabolic control than acarbose in aged type 2 diabetes inadequately controlled with metformin. *Diabetes Res Clin Pract* 2015;**108**(3):e67-e70

**Wang 2016**

Wang W, Yang J, Yang G, et al. Efficacy and safety of linagliptin in Asian patients with type 2 diabetes mellitus inadequately controlled by metformin: A multinational 24-week, randomized clinical trial. *J Diabetes* 2016;**8**(2):229-37

**Wang 2016a**

Wang Y, Xu L, Yuan L, et al. Sodium-glucose co-transporter-2 inhibitors suppress atrial natriuretic peptide secretion in patients with newly diagnosed Type 2 diabetes. *Diabetic Med* 2016;**33**(12):1732-36

**Wang 2017**

Wang W, Ning G, Ma J, et al. A randomized clinical trial of the safety and efficacy of sitagliptin in patients with type 2 diabetes mellitus inadequately controlled by acarbose alone. *Curr Med Res Opin* 2017;**33**(4):693-99

**Wang 2019**

Wang W, Nevarez L, Filippova E, et al. Efficacy and safety of once-weekly dulaglutide versus insulin glargine in mainly Asian patients with type 2 diabetes mellitus on metformin and/or a sulphonylurea: A 52-week open-label, randomized phase III trial. *Diabetes, obesity & metabolism* 2019;**21**(2):234-43

**Wang 2020**

Wang Q, Wang D, Cheng A, et al. Comparison between the effects of sitagliptin and liraglutide on blood glucose and cognitive function of patients with both type 2 diabetes mellitus and post-stroke mild cognitive impairment. *Int J Clin Experimental Med* 2020;**13**(2):1219-27

**Watanabe 2005**

Watanabe I, Tani S, Anazawa T, et al. Effect of pioglitazone on arteriosclerosis in comparison with that of glibenclamide. *Diabetes Res Clin Pract* 2005;**68**(2):104-10

**Wolever 2000**

Wolever TMS, Assiff L, Basu T, et al. Miglitol, an alpha-glucosidase inhibitor, prevents the metformin-induced fall in serum folate and vitamin B12 in subjects with type 2 diabetes. *Nutr Res* 2000;**20**(10):1447-56

**Wolffenbittel 1999**

Wolffenbittel BH, Landgraf R. A 1-year multicenter randomized double-blind comparison of repaglinide and glyburide for the treatment of type 2 diabetes. Dutch and German Repaglinide Study Group. *Diabetes Care* 1999;**22**(3):463-7

**Wolffenbittel 2000**

Wolffenbittel BH, Gomis R, Squatrito S, et al. Addition of low-dose rosiglitazone to sulphonylurea therapy improves glycaemic control in Type 2 diabetic patients. *Diabetic Med* 2000;**17**(1):40-7

**Wong 2005**

Wong TY, Szeto CC, Chow KM, et al. Rosiglitazone reduces insulin requirement and C-reactive protein levels in type 2 diabetic patients receiving peritoneal dialysis. *Am J Kidney Dis* 2005;**46**(4):713-9

**Wu 2014**

Wu S, Li X, Zhang H. Effects of metformin on endothelial function in type 2 diabetes. *Exp Ther Med* 2014;**7**(5):1349-53

**Wu 2015**

Wu W, Li Y, Chen X, et al. Effect of linagliptin on glycemic control in Chinese patients with newly-diagnosed, drug-naive type 2 diabetes mellitus: A randomized controlled trial. *Med Sci Monit* 2015;**21**:2678-84

**Xiao 2015**

Xiao CC, Ren A, Yang J, et al. Effects of pioglitazone and glipizide on platelet function in patients with type 2 diabetes. *Eur Rev Med Pharmacol Sci* 2015;**19**(6):963-70

**Xiao 2016**

Xiao X, Cui X, Zhang J, et al. Effects of sitagliptin as initial therapy in newly diagnosed elderly type 2 diabetics: A randomized controlled study. *Experimental and Therapeutic Medicine* 2016;**12**(5):3002-08

**Xu 2017**

Xu W, Mu Y, Zhao J, et al. Efficacy and safety of metformin and sitagliptin based triple antihyperglycemic therapy (STRATEGY): a multicenter, randomized, controlled, non-inferiority clinical trial. *Sci China Life Sci* 2017;**60**(3):225-38

**Yabiku 2017**

Yabiku K, Mutoh A, Miyagi K, et al. Effects of oral antidiabetic drugs on changes in the liver-to-spleen ratio on computed tomography and inflammatory biomarkers in patients with type 2 diabetes and nonalcoholic fatty liver disease. *Clin Ther* 2017;**39**(3):558-66

**Yale 2013**

Yale JF, Bakris G, Cariou B, et al. Efficacy and safety of canagliflozin in subjects with type 2 diabetes and chronic kidney disease. *Diabetes Obes Metab* 2013;**15**(5):463-73

**Yamakage 2019**

Yamakage H, Tanaka M, Inoue T, et al. Effects of dapagliflozin on the serum levels of fibroblast growth factor 21 and myokines and muscle mass in Japanese patients with type 2 diabetes: A randomized, controlled trial. *J Diabetes Investig* 2019

**Yamamoto 2018**

Yamamoto S, Hayashi T, Ohara M, et al. Comparison of liraglutide plus basal insulin and basal-bolus insulin therapy (BBIT) for glycemic control, body weight stability, and treatment satisfaction in patients treated using BBIT for type 2 diabetes without severe insulin deficiency: a randomized prospective pilot study. *Diabetes research and clinical practice* 2018;**140**:339-46

**Yamanouchi 2005**

Yamanouchi T, Sakai T, Igarashi K, et al. Comparison of metabolic effects of pioglitazone, metformin, and glimepiride over 1 year in Japanese patients with newly diagnosed Type 2 diabetes. *Diabet Med* 2005;**22**(8):980-5

**Yamasaki 2005**

Yamasaki Y, Katakami N, Hayaishi-Okano R, et al. a-glucosidase inhibitor reduces the progression of carotid intima-media thickness. *Diabetes Res Clin Pract* 2005;**67**(3):204-10

**Yan 2019**

Yan J, Yao B, Kuang H, et al. Liraglutide, Sitagliptin, and Insulin Glargine Added to Metformin: The Effect on Body Weight and Intrahepatic Lipid in Patients With Type 2 Diabetes Mellitus and Nonalcoholic Fatty Liver Disease. *Hepatology* 2019;**69**(6):2414-26

**Yang 2002**

Yang WS, Jeng CY, Wu TJ, et al. Synthetic peroxisome proliferator-activated receptor-gamma agonist, rosiglitazone, increases plasma levels of adiponectin in type 2 diabetic patients. *Diabetes Care* 2002;**25**(2):376-80

**Yang 2011**

Yang W, Pan CY, Tou C, et al. Efficacy and safety of saxagliptin added to metformin in Asian people with type 2 diabetes mellitus: a randomized controlled trial. *Diabetes Res Clin Pract* 2011;**94**(2):217-24

**Yang 2012**

Yang W, Guan Y, Shentu Y, et al. The addition of sitagliptin to ongoing metformin therapy significantly improves glycemic control in Chinese patients with type 2 diabetes. *J Diabetes* 2012;**4**(3):227-37

**Yang 2013**

Yang SJ, Min KW, Gupta SK, et al. A multicentre, multinational, randomized, placebo-controlled, double-blind, phase 3 trial to evaluate the efficacy and safety of gemigliptin (LC15-0444) in patients with type 2 diabetes. *Diabetes Obes Metab* 2013;**15**(5):410-16

**Yang 2015**

Yang HK, Min KW, Park SW, et al. A randomized, placebo-controlled, double-blind, phase 3 trial to evaluate the efficacy and safety of anagliptin in drug-naive patients with type 2 diabetes. *Endocrine J* 2015;**62**(5):449-62

**Yang 2015a**

Yang W, Xing X, Lv X, et al. Vildagliptin added to sulfonylurea improves glycemic control without hypoglycemia and weight gain in Chinese patients with type 2 diabetes mellitus. *J Diabetes* 2015;**7**(2):174-81

**Yang 2016**

Yang W, Han P, Min KW, et al. Efficacy and safety of dapagliflozin in Asian patients with type 2 diabetes after metformin failure: A randomized controlled trial. *J Diabetes* 2016;**8**(6):796-808

**Yang 2018**

Yang W, Ma J, Li Y, et al. Dapagliflozin as add-on therapy in Asian patients with type 2 diabetes inadequately controlled on insulin with or without oral antihyperglycemic drugs: A randomized controlled trial. *Journal of Diabetes* 2018;**10**(7):589-99

**Yee 2010**

Yee MS, Pavitt DV, Dhanjil S, et al. The effects of rosiglitazone on atherosclerotic progression in patients with Type 2 diabetes at high cardiovascular risk. *Diabet Med* 2010;**27**(12):1392-400

**Yki-Jarvinen 1999**

Yki-Järvinen H, Ryysy L, Nikkilä K, et al. Comparison of bedtime insulin regimens in patients with type 2 diabetes mellitus. A randomized, controlled trial. *Ann Intern Med* 1999;**130**(5):389-96

**Yki-Jarvinen 2013**

Yki-Jarvinen H, Rosenstock J, Duran-Garcia S, et al. Effects of adding linagliptin to basal insulin regimen for inadequately controlled type 2 diabetes: A >52-week randomized, double-blind study. *Diabetes Care* 2013;**36**(12):3875-81

**Yoon 2011**

Yoon KH, Shockey GR, Teng R, et al. Effect of initial combination therapy with sitagliptin, a dipeptidyl peptidase-4 inhibitor, and pioglitazone on glycemic control and measures of beta-cell function in patients with type 2 diabetes. *Int J Clin Pract* 2011;**65**(2):154-64

**Yoon 2011a**

Yoon KH, Shin JA, Kwon HS, et al. Comparison of the efficacy of glimepiride, metformin, and rosiglitazone monotherapy in Korean drug-naive type 2 diabetic patients: The practical evidence of antidiabetic monotherapy study. *Diabetes Metabol J* 2011; 35(1):26-33

**Yuan 2012**

Yuan GH, Song WL, Huang YY, et al. Efficacy and tolerability of exenatide monotherapy in obese patients with newly diagnosed type 2 diabetes: a randomized, 26 weeks metformin-controlled, parallel-group study. *Chinese Med J* 2012;**125**(15):2677-81

**Zang 2016**

Zang L, Liu Y, Geng J, et al. Efficacy and safety of liraglutide versus sitagliptin, both in combination with metformin, in Chinese patients with type 2 diabetes: a 26-week, open-label, randomized, active comparator clinical trial. *Diabetes Obes Metab* 2016;**18**(8):803-11

**ZEUS II**

Cho YM, Deerochanawong C, Seekaew S, et al. Efficacy and safety of gemigliptin as add-on therapy to insulin with or without metformin in patients with type 2 diabetes mellitus (ZEUS II study). *Diabetes, obesity & metabolism* 2019

**Zhang 2020**

Zhang LY, Qu XN, Sun ZY, et al. Effect of liraglutide therapy on serum fetuin A in patients with type 2 diabetes and non-alcoholic fatty liver disease. *Clin Res Hepatol Gastroenterol* 2020

**Zheng 2019**

Zheng HH, Lei Y, Chen XH, et al. Retinal neuroprotective effect of GLP-1 analogs liraglutide in early diabetic retinopathy. *International Eye Science* 2019;**19**(2):275-79

**Zhu 2003**

Zhu XX, Pan CY, Li GW, et al. Addition of rosiglitazone to existing sulfonylurea treatment in Chinese patients with type 2 diabetes and exposure to hepatitis B or C. *Diabetes Technol Ther* 2003;**5**(1):33-42

**Zib 2007**

Zib I, Jacob AN, Lingvay I, et al. Effect of pioglitazone therapy on myocardial and hepatic steatosis in insulin-treated patients with type 2 diabetes. *J Invest Med* 2007;**55**(5):230-6

**Appendix 3 Risk of bias in included studies**

| Study                 | Trial registration | Number of participants | Random sequence generation (selection bias) | Allocation concealment (selection bias) | Blinding of participants and investigators (performance and detection bias) | Blinding of outcome assessment (performance and detection bias) | Incomplete data (attrition bias) | Selective reporting (reporting bias) |
|-----------------------|--------------------|------------------------|---------------------------------------------|-----------------------------------------|-----------------------------------------------------------------------------|-----------------------------------------------------------------|----------------------------------|--------------------------------------|
| 3D                    | UMIN000003784      | 80                     | Low                                         | Low                                     | High                                                                        | Unclear                                                         | Low                              | High                                 |
| 4B                    | NCT00960661        | 627                    | Low                                         | Unclear                                 | High                                                                        | Unclear                                                         | Low                              | Low                                  |
| 4T                    | ISCRTN51125379     | 473                    | Low                                         | Low                                     | High                                                                        | Unclear                                                         | Low                              | Low                                  |
| 1860-LIRA-DPP-4       | NCT00700817        | 665                    | Low                                         | Low                                     | High                                                                        | Unclear                                                         | High                             | Low                                  |
| Abe 2008              | Not provided       | 63                     | Unclear                                     | Unclear                                 | High                                                                        | Unclear                                                         | Low                              | High                                 |
| Abe 2016              | UMIN000018445      | 82                     | Unclear                                     | Unclear                                 | High                                                                        | Unclear                                                         | Low                              | High                                 |
| ACTION-J              | UMIN000002333      | 54                     | Low                                         | Unclear                                 | High                                                                        | Unclear                                                         | Low                              | High                                 |
| ADOPT                 | NCT00279045        | 4360                   | Unclear                                     | Low                                     | Low                                                                         | Low                                                             | High                             | Low                                  |
| Ahmann 2015           | NCT01617434        | 450                    | Unclear                                     | Low                                     | Low                                                                         | Unclear                                                         | Low                              | High                                 |
| Ahrén 2004            | Not applicable     | 71                     | Unclear                                     | Low                                     | Low                                                                         | Unclear                                                         | Low                              | High                                 |
| Allegretti 2019       | NCT02836873        | 312                    | Low                                         | Low                                     | Low                                                                         | Low                                                             | Low                              | High                                 |
| Alogliptin Study 007  | NCT00286468        | 500                    | Unclear                                     | Low                                     | Low                                                                         | Unclear                                                         | High                             | Low                                  |
| Alogliptin Study 009  | NCT00286494        | 493                    | Low                                         | Low                                     | Low                                                                         | Unclear                                                         | Low                              | Low                                  |
| Alogliptin Study 010  | NCT00286455        | 328                    | Unclear                                     | Unclear                                 | High                                                                        | Unclear                                                         | Unclear                          | High                                 |
| Alvarsson 2003        | Not applicable     | 51                     | Unclear                                     | Unclear                                 | High                                                                        | Unclear                                                         | High                             | Low                                  |
| APOLLO                | NCT00311818        | 415                    | Low                                         | Low                                     | High                                                                        | Unclear                                                         | Low                              | High                                 |
| Apovian 2010          | Not provided       | 194                    | Unclear                                     | Low                                     | Low                                                                         | Unclear                                                         | High                             | High                                 |
| APPROACH              | NCT00116831        | 672                    | Low                                         | Low                                     | Low                                                                         | Low                                                             | High                             | Low                                  |
| APRIME                | UMIN000004367      | 63                     | Unclear                                     | Unclear                                 | High                                                                        | Unclear                                                         | High                             | Low                                  |
| Araki 2015            | NCT01368081        | 336                    | Low                                         | Low                                     | High                                                                        | Unclear                                                         | Low                              | Low                                  |
| Araki 2015a           | NCT01584232        | 361                    | Low                                         | Low                                     | High                                                                        | Low                                                             | Low                              | Low                                  |
| Arechavaleta 2011     | NCT00701090        | 1035                   | Low                                         | Low                                     | Low                                                                         | Unclear                                                         | High                             | Low                                  |
| Arjona Ferreira 2013  | NCT00509236        | 129                    | Low                                         | Low                                     | Low                                                                         | Unclear                                                         | High                             | Low                                  |
| Arjona Ferreira 2013a | NCT00509262        | 423                    | Low                                         | Low                                     | Low                                                                         | Unclear                                                         | High                             | Low                                  |
| Arturi 2017           | Not provided       | 32                     | Unclear                                     | Unclear                                 | High                                                                        | Unclear                                                         | Low                              | High                                 |
| Asian Acarbose Study  | Not provided       | 121                    | Unclear                                     | Low                                     | Low                                                                         | Unclear                                                         | Low                              | High                                 |
| Aso 2019              | Not provided       | 57                     | Unclear                                     | Unclear                                 | High                                                                        | Unclear                                                         | Unclear                          | High                                 |
| Avilés-Santa 1999     | Not provided       | 43                     | Unclear                                     | Low                                     | Low                                                                         | Unclear                                                         | Low                              | High                                 |
| AWARD-1               | NCT01064687        | 976                    | Low                                         | Low                                     | Low                                                                         | Unclear                                                         | High                             | Low                                  |
| AWARD-2               | NCT01075282        | 807                    | Low                                         | Low                                     | High                                                                        | Low                                                             | Low                              | Low                                  |
| AWARD-3               | NCT01126580        | 807                    | Low                                         | Low                                     | Low                                                                         | Unclear                                                         | High                             | Low                                  |
| AWARD-4               | NCT01191268        | 884                    | Low                                         | Low                                     | High                                                                        | Low                                                             | High                             | Low                                  |
| AWARD-5               | NCT00734474        | 1098                   | Unclear                                     | Low                                     | Low                                                                         | Unclear                                                         | Low                              | Low                                  |
| AWARD-7               | NCT01621178        | 577                    | Low                                         | Low                                     | High                                                                        | Low                                                             | Low                              | Low                                  |
| AWARD-8               | NCT01769378        | 299                    | Unclear                                     | Low                                     | Low                                                                         | Unclear                                                         | Low                              | Low                                  |
| AWARD-9               | NCT02152371        | 300                    | Low                                         | Low                                     | Low                                                                         | Low                                                             | Low                              | Low                                  |
| AWARD-10              | NCT02597049        | 424                    | Low                                         | Low                                     | Low                                                                         | Low                                                             | Low                              | Low                                  |
| AWARD-CHN1            | NCT01644500        | 737                    | Low                                         | Low                                     | Low                                                                         | Low                                                             | Low                              | Low                                  |
| Ba 2017               | NCT01590771        | 498                    | Low                                         | Low                                     | Low                                                                         | Low                                                             | Low                              | Low                                  |
| Bachmann 2003         | Not applicable     | 373                    | Unclear                                     | Low                                     | Low                                                                         | Unclear                                                         | Unclear                          | Low                                  |
| Bailey 2010           | NCT00528879        | 546                    | Low                                         | Low                                     | Low                                                                         | Unclear                                                         | Low                              | Low                                  |
| Bailey 2012           | Not provided       | 282                    | Low                                         | Low                                     | Low                                                                         | Unclear                                                         | Low                              | High                                 |
| Bajaj 2014            | NCT00996658        | 272                    | Low                                         | Low                                     | Low                                                                         | Low                                                             | High                             | Low                                  |
| Bakris 2006           | Not provided       | 389                    | Unclear                                     | Low                                     | Low                                                                         | Unclear                                                         | High                             | High                                 |
| BALANCE               | NCT02126358        | 193                    | Unclear                                     | Unclear                                 | High                                                                        | Unclear                                                         | Unclear                          | High                                 |
| Banerji 1995          | Not applicable     | 20                     | Unclear                                     | Low                                     | Low                                                                         | Unclear                                                         | High                             | High                                 |
| Barnett 2003          | Not applicable     | 171                    | Unclear                                     | Low                                     | Low                                                                         | Unclear                                                         | Low                              | High                                 |
| Barnett 2012          | NCT00757588        | 455                    | Low                                         | Low                                     | Low                                                                         | Unclear                                                         | High                             | Low                                  |
| Barnett 2013          | NCT01084005        | 241                    | Low                                         | Low                                     | Low                                                                         | Low                                                             | Low                              | Low                                  |



|                       |                  |       |         |         |      |         |         |      |
|-----------------------|------------------|-------|---------|---------|------|---------|---------|------|
| Barzilai 2011         | NCT00305604      | 206   | Unclear | Low     | Low  | Unclear | High    | High |
| Bayrasheva 2020       | Not provided     | 44    | Low     | Low     | High | Unclear | Unclear | High |
| BEGIN: ADD TO GLP-1   | NCT01664247      | 346   | Unclear | Low     | Low  | Unclear | High    | Low  |
| BEGIN: VICTOZA ADD-ON | NCT01388361      | 177   | Unclear | Unclear | High | Unclear | Low     | Low  |
| Berberoglu 2010       | Not provided     | 49    | Unclear | Unclear | High | Unclear | High    | High |
| Bergenstal 2009       | NCT00097877      | 372   | Low     | Low     | High | Unclear | High    | Low  |
| Berndt-Zipfel 2013    | Not provided     | 44    | Unclear | Unclear | High | Unclear | Unclear | High |
| BEST                  | NCT00420511      | 21    | Unclear | Low     | Low  | Unclear | High    | High |
| BETA                  | NCT00562172      | 75    | Unclear | Unclear | High | Unclear | High    | High |
| Bi 2013               | ChiCTR-TRC-      | 160   | Low     | Unclear | High | Unclear | Unclear | High |
| Bilezikian 2013       | NCT00679939      | 225   | Low     | Low     | Low  | Unclear | High    | Low  |
| Birkeland 1994a       | Not applicable   | 36    | Unclear | Unclear | High | Unclear | Low     | High |
| Bode 2013             | NCT01106651      | 714   | Low     | Low     | Low  | Unclear | High    | Low  |
| Bolinder 2012         | NCT00855166      | 182   | Low     | Low     | Low  | Unclear | High    | Low  |
| Bolli 2009            | Not provided     | 576   | Unclear | Low     | Low  | Unclear | Unclear | Low  |
| Borges 2011           | NCT00386100      | 688   | Unclear | Low     | Low  | Unclear | High    | Low  |
| Bosi 2007             | NCT00099892      | 544   | Unclear | Low     | Low  | Unclear | High    | Low  |
| Bosi 2009             | NCT00382096 and  | 589   | Unclear | Low     | Low  | Unclear | Low     | Low  |
| Bosi 2011             | NCT00432276      | 803   | Unclear | Low     | Low  | Unclear | Low     | Low  |
| Bouchi 2017           | UMIN000015867    | 19    | Unclear | Unclear | High | Unclear | Low     | High |
| Braun 1996            | Not applicable   | 152   | Unclear | Low     | Low  | Unclear | High    | High |
| BRL-049653/334        | Not provided     | 200   | Unclear | Low     | Low  | Unclear | High    | High |
| Bryson 2016           | Not provided     | 447   | Unclear | Low     | Low  | Unclear | Unclear | Low  |
| Bunck 2009            | NCT00097500      | 69    | Unclear | Unclear | High | Unclear | High    | High |
| Buse 2011             | NCT00765817      | 260   | Low     | Low     | Low  | Unclear | Low     | Low  |
| Camerini-Davalos 1988 | Not applicable   | 147   | Low     | Low     | Low  | Low     | High    | High |
| Camerini-Davalos 1984 | Not applicable   | 70    | Low     | Low     | Low  | Unclear | Low     | High |
| Campbell 1994         | Not applicable   | 48    | Unclear | Unclear | High | Unclear | Low     | High |
| CANDLE                | UMIN000017669    | 245   | Unclear | Unclear | High | Unclear | High    | Low  |
| CANATATA-D            | NCT01106677      | 1284  | Low     | Low     | Low  | Unclear | Low     | Low  |
| CANTATA-D2            | NCT01137812      | 756   | Low     | Low     | Low  | Unclear | High    | Low  |
| CANTATA-M             | NCT01081834      | 584   | Unclear | Low     | Low  | Unclear | High    | Low  |
| CANTATA-MSU           | NCT01106625      | 469   | Low     | Low     | Low  | Unclear | High    | Low  |
| CANTATA-SU            | NCT00968812      | 1450  | Low     | Low     | Low  | Unclear | Low     | High |
| CANVAS/CANVAS-R       | NCT01032629/NCT0 | 10142 | Low     | Low     | Low  | Unclear | Low     | Low  |
| Carlson 2019          | Not provided     | 33    | Unclear | Unclear | High | Unclear | High    | High |
| CARMELINA             | NCT01897532      | 6991  | Low     | Low     | Low  | Low     | Low     | Low  |
| CAROLINA              | NCT01243424      | 6042  | Low     | Low     | Low  | Low     | Low     | Low  |
| Casner 1988           | Not applicable   | 64    | Unclear | Unclear | High | Unclear | High    | High |
| Cefalu 2015           | NCT01031680      | 922   | Low     | Low     | Low  | Unclear | Low     | Low  |
| Chacra 2017           | NCT01698775      | 213   | Unclear | Low     | Low  | Unclear | Low     | Low  |
| Chakraborty 2011      | Not provided     | 208   | Unclear | Unclear | High | Unclear | High    | High |
| Charbonnel 2013       | NCT01296412      | 653   | Low     | Low     | High | Unclear | High    | High |
| Charpentier 2009      | Not provided     | 299   | Unclear | Low     | Low  | Unclear | High    | Low  |
| Charpentier 2017      | Not provided     | 359   |         |         |      |         |         |      |
| Chavez 2015           | Not provided     | 21    | Unclear | Unclear | High | Unclear | Unclear | High |
| Chen 2015             | NCT01214239      | 299   | High    | Low     | Low  | Unclear | High    | High |
| Chen 2016             | NCT01175486      | 60    | Unclear | Unclear | High | Unclear | Low     | High |
| Chiasson 1994         | Not applicable   | 354   | Unclear | Unclear | High | Unclear | High    | High |
| Chiasson 2001         | Not applicable   | 248   | Unclear | Low     | Low  | Unclear | Low     | Low  |
| CHICAGO               | NCT00225264      | 462   | Unclear | Low     | Low  | Unclear | Low     | Low  |
| Chien 2011            | Not provided     | 97    | Unclear | Unclear | High | Unclear | Unclear | High |
| Cho 2019              | UMIN000022804    | 71    | Unclear | Unclear | High | Unclear | Low     | High |
| Choi 2004             | Not applicable   | 55    | Unclear | Unclear | High | Unclear | High    | High |
| Chou 2008             | SB-797620/004    | 457   | Unclear | Low     | Low  | Unclear | Low     | Low  |
| Chou 2012             | NCT00484198      | 1912  | Unclear | Low     | Low  | Low     | High    | Low  |
| CIMT                  | NCT00657943      | 412   | Low     | Low     | Low  | Unclear | High    | High |
| Civera 2008           | Not provided     | 24    | Unclear | Unclear | High | Unclear | Low     | Low  |

|                   |                |       |         |         |      |         |      |      |
|-------------------|----------------|-------|---------|---------|------|---------|------|------|
| COMPASS           | UMIN00004716   | 130   | Low     | Unclear | High | Unclear | High | High |
| CompoSIT-I        | NCT02738879    | 746   | Low     | Low     | Low  | Unclear | High | Low  |
| CompoSIT-R        | NCT02532855    | 614   | Low     | Low     | Low  | Unclear | Low  | Low  |
| CONFIDENCE        | NCT01147627    | 416   | Low     | Low     | High | Unclear | High | High |
| Coniff 1994       | Not applicable | 189   | Unclear | Low     | Low  | Unclear | High | High |
| Coniff 1995       | Not applicable | 129   | Unclear | Low     | Low  | Unclear | High | Low  |
| Coniff 1995a      | Not applicable | 207   | Unclear | Low     | Low  | Unclear | Low  | High |
| Costa 1997        | Not applicable | 65    | Unclear | Low     | Low  | Unclear | High | High |
| CRENCE            | NCT02065791    | 4401  | Low     | Low     | Low  | Low     | Low  | Low  |
| Cusi 2019         | NCT02009488    | 56    | Low     | Low     | Low  | Unclear | High | High |
| CV181-011         | NCT00121641    | 401   | Unclear | Low     | Low  | Unclear | High | Low  |
| CV181-013         | NCT00295633    | 565   | Low     | Low     | Low  | Unclear | High | Low  |
| CV181-039         | NCT00327015    | 971   | Low     | Low     | Low  | Unclear | High | Low  |
| da Silva 2016     | NCT02607410    | 35    | Unclear | Unclear | High | Unclear | Low  | High |
| Dailey 2004       | Not applicable | 365   | Unclear | Low     | Low  | Unclear | High | Low  |
| Dapagliflozin 006 | NCT00673231    | 807   | Low     | Low     | Low  | Low     | Low  | Low  |
| DAPA-HF           | NCT03036124    | 2139  | Low     | Low     | Low  | Low     | Low  | Low  |
| Dargie 2007       | GSK 49653/211  | 224   | Low     | Low     | Low  | Unclear | High | Low  |
| Davidson 2007     | Not provided   | 245   | Unclear | Low     | Low  | Unclear | High | High |
| Davies 2013       | NCT01003184    | 216   | Low     | Low     | High | Unclear | High | High |
| Davies 2017       | NCT01923181    | 421   | Low     | Low     | High | Unclear | Low  | Low  |
| DECLARE-TIMI 58   | NCT01730534    | 17160 | Low     | Low     | Low  | Low     | Low  | Low  |
| DeFronzo 1995     | Not applicable | 419   | Unclear | Low     | Low  | Unclear | High | Low  |
| DeFronzo 2005     | Not applicable | 336   | Unclear | Low     | Low  | Low     | High | High |
| DeFronzo 2012     | NCT00328627    | 386   | Unclear | Low     | Low  | Unclear | High | Low  |
| DeFronzo 2015     | NCT01422876    | 405   | Low     | Low     | Low  | Unclear | High | Low  |
| Dei Cas 2017      | NCT01822548    | 64    | Low     | Unclear | High | Unclear | High | High |
| Dejager 2007      | NCT00099905    | 632   | Unclear | Low     | Low  | Unclear | Low  | High |
| Del Prato 2003    | Not applicable | 428   | Unclear | Low     | Low  | Unclear | High | High |
| Del Prato 2011    | Not provided   | 503   | Unclear | Low     | Low  | Unclear | Low  | High |
| Del Prato 2014    | NCT00856284    | 2639  | Unclear | Low     | Low  | Low     | High | Low  |
| DELIGHT           | NCT02547935    | 293   | Low     | Low     | Low  | Low     | Low  | High |
| Deng 2017         | Not provided   | 72    | Unclear | Low     | High | Unclear | Low  | High |
| DERIVE            | NCT02413398    | 321   | Low     | Low     | Low  | Unclear | Low  | Low  |
| Derosa 2003       | Not applicable | 124   | Unclear | Unclear | High | Unclear | Low  | High |
| Derosa 2003a      | Not applicable | 112   | Unclear | Unclear | High | Unclear | Low  | High |
| Derosa 2004       | Not applicable | 164   | Unclear | Unclear | High | Unclear | Low  | High |
| Derosa 2005       | Not applicable | 95    | Low     | Low     | Low  | Unclear | Low  | High |
| Derosa 2007       | Not provided   | 248   | Low     | Low     | Low  | Unclear | Low  | High |
| Derosa 2009       | Not provided   | 350   | Low     | Low     | Low  | Unclear | High | High |
| Derosa 2009a      | Not provided   | 271   | Low     | Low     | Low  | Unclear | Low  | High |
| Derosa 2010       | Not provided   | 151   | Unclear | Unclear | High | Unclear | Low  | High |
| Derosa 2010a      | Not provided   | 128   | Unclear | Unclear | High | Unclear | Low  | High |
| Derosa 2011       | Not provided   | 188   | Unclear | Unclear | High | Unclear | High | High |
| Derosa 2011a      | Not provided   | 111   | Unclear | Unclear | High | Unclear | High | High |
| Derosa 2012       | Not provided   | 178   | Unclear | Unclear | High | Unclear | High | High |
| Derosa 2012a      | Not provided   | 167   | Unclear | Unclear | High | Unclear | High | High |
| Derosa 2013       | Not provided   | 171   | Unclear | Low     | Low  | Unclear | Low  | High |
| Derosa 2014       | Not provided   | 167   | Unclear | Low     | Low  | Unclear | High | High |
| Derosa 2014a      | Not provided   | 205   | Unclear | Low     | Low  | Unclear | Low  | High |
| DIA3004           | NCT01064414    | 269   | Low     | Low     | Low  | Unclear | High | Low  |
| Distiller 2014    | Not provided   | 28    | Unclear | Unclear | High | Unclear | Low  | High |
| DIVERSITY-CVR     | UMIN00028014   | 340   | Low     | Low     | High | Low     | High | High |
| Dobs 2013         | NCT00350779    | 278   | Low     | Low     | Low  | Unclear | High | Low  |
| Dorkhan 2009      | Not provided   | 30    | Unclear | Unclear | High | Unclear | Low  | High |
| Douek 2005        | Not provided   | 183   | Unclear | Low     | Low  | Unclear | High | High |
| Drent 2002        | Not applicable | 465   | Unclear | Low     | Low  | Unclear | High | Low  |
| DUAL-I            | NCT01336023    | 829   | Low     | Low     | High | Low     | Low  | High |

|                         |                |       |         |         |      |         |         |      |
|-------------------------|----------------|-------|---------|---------|------|---------|---------|------|
| DUAL-I CHINA            | NCT03172494    | 359   | Low     | Low     | Low  | Low     | Low     | Low  |
| DUAL-I JAPAN            | NCT02607306    | 544   | Low     | Low     | High | Low     | Low     | Low  |
| DUAL-II                 | NCT01392573    | 398   | Low     | Low     | High | Unclear | Low     | Low  |
| DUAL-II CHINA           | NCT03175120    | 453   | Low     | Low     | Low  | Low     | Low     | Low  |
| DUAL-III                | NCT01676116    | 438   | Unclear | Unclear | High | Unclear | High    | High |
| DUAL-VIII               | NCT02501161    | 1012  | Low     | Low     | High | Low     | High    | Low  |
| DUAL-IX                 | NCT02773368    | 420   | Low     | Low     | High | Low     | High    | Low  |
| DUET-Beta               | Not provided   | 48    | Unclear | Unclear | High | Unclear | Unclear | High |
| DURATION-2              | NCT00637273    | 491   | Low     | Low     | Low  | Unclear | High    | Low  |
| DURATION-3              | NCT00641056    | 456   | Low     | Low     | High | Low     | High    | Low  |
| DURATION-4              | NCT00676338    | 820   | Low     | Low     | Low  | Unclear | High    | Low  |
| DURATION-7              | NCT02229383    | 461   | Low     | Low     | Low  | Low     | High    | Low  |
| DURATION-8              | NCT02229396    | 464   | Low     | Low     | Low  | Low     | Low     | Low  |
| DURATION-NEO-2          | NCT01652729    | 364   | Low     | Low     | Low  | Low     | Low     | Low  |
| EAGLE                   | Not provided   | 978   | Unclear | Unclear | High | Unclear | High    | High |
| EASIE                   | NCT00751114    | 515   | Low     | Low     | High | Unclear | High    | Low  |
| Ebato 2009              | Not provided   | 26    | Unclear | Unclear | High | Unclear | Low     | High |
| EDIT                    | UMIN000004678  | 50    | Low     | Unclear | High | Unclear | Low     | High |
| Efstathiou 2015         | Not provided   | 66    | Unclear | Unclear | High | Unclear | Unclear | High |
| ELEGANT                 | NCT01392898    | 50    | Low     | Unclear | High | Unclear | Low     | High |
| ELIXA                   | NCT01147250    | 6068  | Low     | Low     | Low  | Low     | Low     | Low  |
| ELLENA-IT               | UMIN000027614  | 61    | Low     | Low     | High | Unclear | Low     | Low  |
| EMBLEM                  | UMIN000024502  | 117   | Low     | Low     | Low  | Unclear | High    | High |
| EMIT                    | NCT01242215    | 243   | Unclear | Low     | Low  | Unclear | High    | High |
| EMLIFA001               | NCT02637973    | 84    | Low     | Low     | Low  | Unclear | High    | High |
| EMPA-HEART CardioLink-6 | NCT01011868    | 97    | Low     | Low     | Low  | Low     | Low     | Low  |
| EMPA-REG BASAL          | NCT01011868    | 494   | Low     | Low     | Low  | Unclear | High    | Low  |
| EMPA-REG H2H-SU         | NCT02998970    | 1549  | Low     | Low     | Low  | Unclear | High    | Low  |
| EMPA-REG MDI            | NCT01306214    | 563   | Unclear | Low     | Low  | Unclear | Low     | Low  |
| EMPA-REG MET            | NCT01159600    | 637   | Low     | Low     | Low  | Unclear | Low     | Low  |
| EMPA-REG METSU          | NCT01159600    | 669   | Low     | Low     | Low  | Unclear | Low     | Low  |
| EMPA-REG MONO           | NCT01177813    | 899   | Low     | Low     | Low  | Unclear | Low     | Low  |
| EMPA-REG OUTCOME        | NCT01131676    | 7020  | Low     | Low     | Low  | Unclear | Low     | Low  |
| EMPA-REG PIO            | NCT01210001    | 498   | Low     | Low     | Low  | Unclear | Low     | Low  |
| EMPA-REG RENAL          | NCT01164501    | 741   | Low     | Low     | Low  | Unclear | Low     | High |
| Engelbrechtsen 2016     | NCT02094183    | 42    | Unclear | Unclear | High | Unclear | High    | High |
| Erem 2014               | Not provided   | 57    | Unclear | Unclear | High | Unclear | Low     | Low  |
| ESPECIAL-ACS            | UMIN000007900  | 41    | Unclear | Unclear | High | Unclear | High    | Low  |
| Esposito 2004           | Not applicable | 175   | Low     | Unclear | High | Unclear | Low     | High |
| Esposito 2011           | Not provided   | 110   | Low     | Unclear | High | Unclear | Low     | Low  |
| Essen Study             | Not applicable | 85    | Low     | Unclear | High | Unclear | Low     | High |
| EUREXA                  | NCT00359762    | 1029  | Low     | Unclear | High | Unclear | High    | Low  |
| EUREXA extension        | NCT00359762    | 154   | Low     | Unclear | High | Unclear | High    | Low  |
| EXAMINE                 | NCT00968708    | 5380  | Unclear | Low     | Low  | Unclear | Low     | Low  |
| Exenatide-113           | Not applicable | 377   | Unclear | Low     | Low  | Unclear | High    | High |
| EXSCEL                  | NCT01144338    | 14752 | Low     | Low     | Low  | Low     | Low     | Low  |
| Feng 2017               | NCT03068065    | 93    | Unclear | Unclear | High | Unclear | Low     | High |
| Ferdinand 2019          | NCT02182830    | 150   | Unclear | Low     | Low  | Unclear | High    | Low  |
| Fernandez 2008          | Not provided   | 20    | Unclear | Unclear | High | Unclear | Low     | High |
| Ferrannini 2010         | NCT00528372    | 485   | Unclear | Low     | Low  | Unclear | Low     | Low  |
| FIGHT                   | NCT01800968    | 178   | Low     | Low     | Low  | Low     | Low     | Low  |
| Filozof 2010            | Not provided   | 1007  | Unclear | Low     | Low  | Low     | High    | High |
| Finn 2009               | NCT00116792    | 65    | Low     | Low     | Low  | Unclear | Low     | High |
| Fischer 1998            | Not applicable | 495   | Unclear | Low     | Low  | Unclear | High    | High |
| Foley 2009              | NCT00102388    | 1092  | Unclear | Low     | Low  | Unclear | High    | High |
| Foley 2011              | NCT00260156    | 59    | Unclear | Low     | Low  | Unclear | Low     | High |
| Fonseca 2000            | Not applicable | 348   | Low     | Low     | Low  | Low     | Low     | Low  |
| Fonseca 2003            | Not applicable | 402   | Unclear | Low     | Low  | Unclear | High    | High |

|                               |                  |      |         |         |         |         |         |      |
|-------------------------------|------------------|------|---------|---------|---------|---------|---------|------|
| Fonseca 2007                  | NCT00099931      | 296  | Unclear | Low     | Low     | Unclear | Low     | Low  |
| Fonseca 2013                  | NCT00885352      | 313  | Unclear | Low     | Low     | Unclear | Low     | Low  |
| Forst 2003                    | Not applicable   | 143  | Unclear | Unclear | High    | Unclear | Unclear | High |
| Forst 2005                    | Not applicable   | 173  | Unclear | Unclear | High    | Unclear | High    | High |
| Forst 2014                    | NCT01106690      | 342  | Low     | Low     | Low     | Unclear | Low     | Low  |
| Forst 2015                    | NCT01649466      | 161  | Unclear | Unclear | High    | Unclear | High    | Low  |
| Frederich 2012                | NCT00316082      | 365  | Unclear | Unclear | Unclear | Unclear | High    | Low  |
| FREEDOM-1                     | NCT01455857      | 460  | Low     | Low     | Low     | Low     | High    | High |
| Frias 2018                    | NCT03131687      | 105  | Low     | Low     | Low     | Low     | High    | Low  |
| Gaal 2001                     | Not applicable   | 152  | Unclear | Low     | Low     | Unclear | High    | High |
| Gallwitz 2011                 | NCT00434954      | 494  | Unclear | Unclear | Unclear | Unclear | High    | High |
| Gallwitz 2012                 | NCT00622284      | 1552 | Low     | Low     | Low     | Unclear | High    | Low  |
| Gantz 2017                    | NCT01703208      | 4202 | Low     | Low     | Low     | Low     | High    | Low  |
| Gantz 2017a                   | NCT01814748      | 303  | Low     | Low     | Low     | Low     | High    | Low  |
| Garber 2006                   | Not provided     | 318  | Unclear | Low     | Low     | Unclear | High    | High |
| Garber 2007                   | NCT00099853      | 463  | Unclear | Low     | Low     | Unclear | High    | High |
| Garber 2008                   | NCT00099944      | 515  | Unclear | Low     | Low     | Unclear | High    | Low  |
| Gastaldelli 2014              | NCT00381342      | 79   | Unclear | Low     | Low     | Unclear | High    | High |
| GENERATION                    | NCT01006603      | 720  | Low     | Low     | Low     | Unclear | High    | Low  |
| Gentile 2001                  | Not applicable   | 100  | Unclear | Low     | Low     | Unclear | Low     | High |
| GetGoal-Duo-1                 | NCT00975286      | 446  | Low     | Low     | Low     | Low     | Low     | Low  |
| GetGoal-Duo-2                 | NCT01768559      | 894  | Low     | Low     | High    | Unclear | High    | Low  |
| GetGoal-F1                    | NCT00763451      | 482  | Unclear | Low     | Low     | Unclear | Low     | High |
| GetGoal-L                     | NCT00715624      | 496  | Low     | Low     | Low     | Unclear | High    | Low  |
| GetGoal-L-C                   | NCT01632163      | 448  | Low     | Low     | Low     | Unclear | High    | High |
| GetGoal-L Asia                | NCT00866658      | 311  | Unclear | Low     | Low     | Unclear | High    | Low  |
| GetGoal-M                     | NCT00712673      | 680  | Unclear | Low     | Low     | Unclear | High    | Low  |
| GetGoal-M-Asia                | NCT01169779      | 390  | Low     | Low     | Low     | Unclear | High    | Low  |
| GetGoal-O                     | NCT01798706      | 350  | Unclear | Low     | Low     | Unclear | Low     | Low  |
| GetGoal-P                     | NCT00763815      | 484  | Unclear | Low     | Low     | Unclear | Low     | Low  |
| GetGoal-S                     | NCT00713830      | 859  | Unclear | Low     | Low     | Unclear | High    | Low  |
| Giles 2008                    | NCT00521820      | 518  | Unclear | Low     | Low     | Unclear | High    | Low  |
| Giugliano 1993                | Not applicable   | 50   | Unclear | Low     | Low     | Unclear | Unclear | High |
| GLAC                          | Not applicable   | 200  | Unclear | Unclear | High    | Unclear | High    | High |
| GLAD                          | Not applicable   | 244  | Low     | Low     | Low     | Unclear | High    | High |
| GLAL                          | Not applicable   | 567  | Unclear | Unclear | High    | Unclear | High    | High |
| Glimepiride Combination Group | Not applicable   | 145  | Unclear | Low     | Low     | Unclear | High    | Low  |
| Göke 2002                     | Not applicable   | 265  | Unclear | Low     | High    | Unclear | High    | High |
| Göke 2010                     | Not provided     | 858  | Low     | Low     | Low     | Unclear | High    | Low  |
| Gómez-Perez 2002              | Not applicable   | 105  | Unclear | Low     | Low     | Unclear | Low     | High |
| Gomis 2011                    | NCT00641043      | 389  | Low     | Low     | Low     | Unclear | High    | High |
| Goodman 2009                  | Not provided     | 370  | Unclear | Low     | Low     | Unclear | High    | High |
| Grant 1996                    | Not applicable   | 75   | Unclear | Unclear | High    | Unclear | High    | High |
| GRAVITAS                      | ISCTRN13643081   | 80   | Unclear | Low     | Low     | Unclear | High    | Low  |
| Grey 2014                     | ACTRN12607000610 | 86   | Low     | Low     | Low     | Unclear | High    | High |
| Gudipaty 2014                 | NCT00775684      | 47   | Unclear | Unclear | High    | Unclear | High    | High |
| Gurkan 2014                   | Not provided     | 34   | Unclear | Unclear | High    | Unclear | Unclear | High |
| Gutniak 1987                  | Not applicable   | 20   | Unclear | Unclear | High    | Unclear | Unclear | High |
| Güvener 1999                  | Not applicable   | 40   | Unclear | Low     | Low     | Unclear | Unclear | High |
| Guzman 2017                   | NCT02111096      | 174  | Low     | Low     | Low     | Low     | High    | High |
| Haak 2012                     | NCT00798161      | 791  | Unclear | Low     | Low     | Unclear | High    | Low  |
| Hadjadj 2016                  | NCT01719003      | 665  | Low     | Low     | Low     | Unclear | Low     | High |
| Halimi 2000                   | Not applicable   | 152  | Unclear | Low     | Low     | Unclear | Low     | High |
| Hällsten 2002                 | Not applicable   | 31   | Unclear | Low     | Low     | Unclear | Low     | High |
| Halvorsen 2019                | NCT01377844      | 286  | Unclear | Low     | Low     | Low     | High    | Low  |
| Halvorsen 2019a               | NCT03115112      | 384  | Low     | Low     | Low     | Low     | Unclear | Low  |
| Han 2016                      | Not provided     | 219  | Unclear | Unclear | Low     | Unclear | Unclear | High |
| Han 2018                      | NCT02452632      | 143  | Low     | Low     | Low     | Unclear | High    | High |

|                         |                 |      |         |         |         |         |         |      |
|-------------------------|-----------------|------|---------|---------|---------|---------|---------|------|
| Handelsman 2017         | NCT01682759     | 751  | Low     | Low     | Low     | Low     | High    | Low  |
| Handelsman 2019         | NCT02284893     | 461  | Low     | Low     | Low     | Unclear | High    | Low  |
| Haneda 2016             | JapicCTI-111507 | 145  | Unclear | Low     | Low     | Unclear | High    | High |
| Hanefeld 1991           | Not applicable  | 100  | Unclear | Low     | Low     | Unclear | Low     | High |
| Hanefeld 2004           | Not applicable  | 639  | Unclear | Low     | Low     | Unclear | High    | High |
| Hanefeld 2007           | Not provided    | 598  | Unclear | Low     | Low     | Unclear | High    | Low  |
| HARMONY 1               | NCT00849056     | 310  | Low     | Low     | Low     | Low     | High    | Low  |
| HARMONY 2               | NCT00849017     | 301  | Low     | Low     | Low     | Unclear | High    | Low  |
| HARMONY 3               | NCT00838903     | 1012 | Unclear | Low     | Low     | Unclear | High    | Low  |
| HARMONY 4               | NCT00838916     | 745  | Low     | Low     | High    | Low     | High    | High |
| HARMONY 5               | NCT00839527     | 685  | Low     | Low     | Low     | Low     | High    | Low  |
| HARMONY 6               | NCT00976391     | 566  | Unclear | Low     | Low     | Unclear | Low     | High |
| HARMONY OUTCOMES        | NCT02465515     | 9463 | Low     | Low     | Low     | Low     | Low     | Low  |
| Hartemann-Heurtier 2009 | NCT00159211     | 27   | Unclear | Low     | Low     | Unclear | Low     | High |
| Hartley 2015            | NCT01189890     | 480  | Low     | Low     | Low     | Unclear | High    | Low  |
| Hasche 1999             | Not applicable  | 74   | Unclear | Low     | Low     | Unclear | Low     | High |
| Hattori 2017            | UMIN000004674   | 74   | Unclear | Unclear | High    | Unclear | Low     | High |
| Hattori 2018            | UMIN000021552   | 102  | Unclear | Unclear | High    | Unclear | Unclear | High |
| HEELA                   | Not provided    | 235  | Unclear | Unclear | High    | Unclear | High    | High |
| Hegele 1995             | Not applicable  | 141  | Unclear | Unclear | Unclear | Unclear | High    | High |
| Heine 2005              | NCT00082381     | 549  | Low     | Low     | High    | Unclear | High    | High |
| Heliövaara 2007         | Not provided    | 59   | Unclear | Low     | Low     | Unclear | Unclear | High |
| Henry 2012              | NCT00643851     | 831  | Low     | Low     | Low     | Unclear | High    | Low  |
| Henry 2014              | NCT00722371     | 751  | Unclear | Unclear | Unclear | Unclear | High    | Low  |
| Hermann 1999            | Not applicable  | 35   | Unclear | Low     | Low     | Unclear | High    | High |
| Hiramatsu 2018          | Not provided    | 139  | Unclear | Unclear | High    | Unclear | High    | High |
| Hirano 2009             | Not provided    | 61   | Low     | Low     | Unclear | Unclear | Low     | High |
| Hirano 2012             | Not provided    | 44   | Low     | Unclear | Unclear | Unclear | Low     | High |
| Hollander 2007          | NCT00054782     | 670  | Unclear | Low     | Low     | Low     | High    | High |
| HOME                    | NCT00375388     | 390  | Low     | Low     | Low     | Unclear | Low     | Low  |
| Home 2018               | NCT01717313     | 329  | Unclear | Low     | Low     | Unclear | High    | Low  |
| Hong 2013               | Not provided    | 50   | Unclear | Unclear | Unclear | Unclear | High    | High |
| Hong 2015               | Not provided    | 72   | Unclear | Unclear | High    | Unclear | High    | Low  |
| Hong 2016               | Not provided    | 142  | Unclear | Low     | Low     | Unclear | High    | High |
| Horton 2000             | Not applicable  | 529  | Low     | Low     | Low     | Unclear | High    | Low  |
| Hotta 1993              | Not applicable  | 37   | Unclear | Low     | Low     | Unclear | High    | High |
| Hsieh 2011              | Not provided    | 105  | Unclear | Unclear | Unclear | Unclear | High    | High |
| Hu 2007                 | Not provided    | 78   | Unclear | Low     | Low     | Unclear | Unclear | High |
| Hwang 2008              | Not provided    | 90   | Unclear | Unclear | High    | Unclear | High    | High |
| Hygum 2020              | NCT02473809     | 60   | Unclear | Low     | Low     | Low     | Low     | High |
| Iacobellis 2017         | NCT02014740     | 95   | Unclear | Unclear | High    | Unclear | High    | High |
| ILLUMINATE              | Not provided    | 60   | Unclear | Low     | Low     | Unclear | Low     | Low  |
| Ikonomidis 2018         | NCT03878706     | 80   | Unclear | Unclear | High    | Unclear | Unclear | High |
| Ikonomidis 2020         | NCT01135433     | 168  | Unclear | Unclear | High    | Unclear | Unclear | High |
| Inagaki 2012            | NCT00935532     | 427  | Low     | Low     | High    | Unclear | High    | Low  |
| Inagaki 2013            | NCT01204294     | 206  | Unclear | Unclear | High    | Unclear | Low     | Low  |
| Inagaki 2014            | NCT01413204     | 272  | Unclear | Low     | Low     | Unclear | Low     | Low  |
| Inagaki 2015            | NCT01632007     | 245  | Low     | Low     | Low     | Unclear | Low     | High |
| INICOM                  | NCT01787396     | 292  | Unclear | Low     | Low     | Unclear | High    | High |
| Inoue 2019              | UMIN000018839   | 49   | Low     | Low     | High    | Unclear | High    | High |
| Insulin Glargine 4014   | Not provided    | 216  | Unclear | Unclear | High    | Unclear | Low     | High |
| INTERVAL                | NCT01257451     | 278  | Low     | Low     | Low     | Unclear | Low     | Low  |
| Ito 2011                | Not provided    | 60   | Unclear | Unclear | High    | Unclear | High    | High |
| Ito 2017                | UMIN000022651   | 66   | Low     | Unclear | High    | Unclear | Low     | High |
| Jabbour 2014            | NCT00984867     | 451  | Unclear | Low     | Low     | Unclear | High    | Low  |
| Jacob 2007              | Not provided    | 57   | Unclear | Unclear | High    | Unclear | High    | High |
| Jain 2006               | Not provided    | 502  | Unclear | Low     | Low     | Unclear | High    | Low  |
| JEDIS-1                 | Not provided    | 49   | Unclear | Unclear | High    | Unclear | High    | High |

|                    |                |     |         |         |         |         |         |      |
|--------------------|----------------|-----|---------|---------|---------|---------|---------|------|
| Jeon 2011          | Not provided   | 102 | Unclear | Unclear | High    | Unclear | Low     | High |
| Jeon 2018          | Not provided   | 310 | Unclear | Unclear | High    | Unclear | Unclear | High |
| Jerums 1987        | Not applicable | 40  | Unclear | Low     | Low     | Unclear | High    | High |
| Ji 2014            | NCT01095653    | 393 | Low     | Low     | Low     | Unclear | High    | High |
| Ji 2016            | Not provided   | 497 | Low     | Low     | Low     | Unclear | High    | Low  |
| Ji 2017            | Not provided   | 484 | Unclear | Low     | Low     | Unclear | High    | High |
| Jian 2018          | Not provided   | 126 | Unclear | Unclear | High    | Unclear | Unclear | High |
| Jibran 2006        | Not provided   | 100 | Unclear | Unclear | Unclear | Unclear | Unclear | High |
| Johnston 1998      | Not applicable | 385 | Unclear | Low     | Low     | Unclear | High    | High |
| Johnston 1998a     | Not applicable | 340 | Unclear | Low     | Low     | Unclear | Low     | High |
| Johnston 1998b     | Not applicable | 364 | Unclear | Low     | Low     | Unclear | Low     | Low  |
| Josse 2003         | Not applicable | 192 | Unclear | Low     | Low     | Unclear | Low     | High |
| Jovanovic 2000     | Not applicable | 361 | Unclear | Low     | Low     | Unclear | High    | High |
| Jovanovic 2004     | Not applicable | 123 | Unclear | Unclear | High    | Unclear | Low     | High |
| Jung 2005          | Not applicable | 30  | Unclear | Unclear | Unclear | Unclear | Low     | High |
| Juurinen 2009      | Not provided   | 81  | Unclear | Low     | Low     | Unclear | Low     | High |
| Kadoglou 2007      | NCT00306176    | 50  | Unclear | Unclear | Unclear | Unclear | Low     | High |
| Kadoglou 2008      | Not provided   | 70  | Unclear | Unclear | High    | Unclear | Low     | High |
| Kadoglou 2011      | Not provided   | 140 | Unclear | Unclear | High    | Unclear | Low     | High |
| Kadowaki 2011      | NCT00577824    | 179 | Unclear | Low     | Low     | Unclear | High    | Low  |
| Kadowaki 2017      | NCT02354235    | 138 | Unclear | Low     | Low     | Unclear | High    | Low  |
| Kadowaki 2018      | NCT02354222    | 154 | Unclear | Low     | Low     | Unclear | High    | Low  |
| Kaku 2009          | UMIN000001110  | 169 | Unclear | Low     | Low     | Unclear | High    | High |
| Kaku 2009a         | UMIN000001363  | 587 | Unclear | Unclear | Unclear | Low     | High    | Low  |
| Kaku 2011          | NCT00393718    | 400 | Unclear | Unclear | High    | Unclear | High    | Low  |
| Kaku 2014          | Not provided   | 261 | Unclear | Low     | Low     | Unclear | High    | High |
| Kaku 2017          | Not provided   | 374 | Unclear | Low     | Low     | Unclear | Low     | Low  |
| Kaku 2019          | NCT02489968    | 447 | Low     | Low     | High    | Unclear | Low     | Low  |
| Kanazawa 2010      | UMIN000001997  | 55  | Unclear | Unclear | High    | Unclear | Low     | High |
| Kanazawa 2011      | UMIN000002099  | 66  | Unclear | Unclear | High    | Unclear | Low     | Low  |
| Kato 2015          | UMIN000013356  | 20  | Unclear | Unclear | High    | Unclear | Low     | High |
| Kawamori 2018      | NCT02453555    | 275 | Low     | Low     | Low     | Low     | Low     | Low  |
| Kelly 2007         | NCT00123643    | 36  | Unclear | Low     | Low     | Unclear | Low     | Low  |
| Kendall 2005       | Not applicable | 733 | Unclear | Low     | Low     | Unclear | High    | High |
| Khaloo 2019        | NCT03125694    | 250 | Unclear | Unclear | High    | Unclear | Low     | High |
| Khanolkar 2008     | Not provided   | 50  | Unclear | Unclear | High    | Unclear | Low     | High |
| Kikuchi 2012       | NCT00297063    | 372 | Unclear | Low     | Low     | Unclear | High    | Low  |
| Kim 2014           | NCT01001611    | 173 | Unclear | Low     | Low     | Unclear | Low     | High |
| Kim 2019           | NCT02426294    | 135 | Unclear | Unclear | High    | Unclear | High    | High |
| Kim 2020           | Not provided   | 243 | Unclear | Low     | Low     | Unclear | High    | Low  |
| KIND-LM            | UMIN000004243  | 46  | Unclear | Unclear | High    | Unclear | Low     | High |
| Kinoshita 2020     | UMIN000021291  | 98  | Low     | Low     | High    | Unclear | High    | High |
| Kiyici 2009        | Not provided   | 50  | Unclear | Unclear | High    | Unclear | Low     | High |
| Ko 2006            | Not provided   | 112 | Unclear | Unclear | High    | Unclear | High    | High |
| Koffert 2017       | NCT02526615    | 41  | Unclear | Unclear | High    | Unclear | Unclear | High |
| Kohan 2014         | NCT00663260    | 252 | Low     | Low     | Low     | Low     | Low     | Low  |
| Kondo 2016         | UMIN00004791   | 171 | Unclear | Unclear | High    | Unclear | High    | High |
| Kothny 2013        | Not provided   | 449 | Low     | Low     | Low     | Unclear | High    | Low  |
| Krawczyk 2005      | Not applicable | 40  | Unclear | Unclear | High    | High    | High    | High |
| Kudo-Fujimaki 2014 | UMIN000004010  | 40  | Unclear | Unclear | High    | Unclear | Low     | High |
| Kumashiro 2018     | Not provided   | 34  | Unclear | Unclear | High    | Unclear | High    | High |
| Laberge 2016       | Not provided   | 116 | Unclear | Unclear | Unclear | Unclear | Unclear | High |
| Lam 1998           | Not applicable | 89  | Unclear | Low     | Low     | Unclear | Low     | High |
| Lambadiari 2018    | NCT03010683    | 60  | Unclear | Unclear | High    | Unclear | Unclear | High |
| Langenfeld 2005    | Not applicable | 179 | Unclear | Unclear | High    | Unclear | High    | High |
| LANTERN            | NCT01316094    | 165 | Unclear | Low     | Low     | Unclear | High    | High |
| Lawrence 2004      | Not applicable | 65  | Unclear | Unclear | High    | Low     | Unclear | High |
| LEAD-1             | Not provided   | 809 | Unclear | Low     | Low     | Unclear | High    | Low  |

|                           |                |      |         |         |      |         |         |      |
|---------------------------|----------------|------|---------|---------|------|---------|---------|------|
| LEAD-2                    | NCT00318461    | 1091 | Low     | Low     | Low  | Unclear | High    | Low  |
| LEAD-3                    | NCT00294723    | 745  | Low     | Low     | Low  | Unclear | High    | Low  |
| LEAD-4                    | NCT00333151    | 533  | Low     | Low     | Low  | Unclear | High    | Low  |
| LEAD-5                    | NCT00331851    | 581  | Low     | Low     | High | Unclear | Low     | High |
| LEADER                    | NCT01179048    | 9340 | Low     | Low     | Low  | Low     | Low     | Low  |
| Lebovitz 2001             | Not applicable | 493  | Unclear | Low     | Low  | Unclear | Low     | High |
| Ledesma 2019              | NCT02240680    | 302  | Unclear | Low     | Low  | Unclear | High    | Low  |
| Lee 2013                  | Not provided   | 121  | Unclear | Low     | Low  | Unclear | Unclear | Low  |
| Lee 2017                  | NCT01704261    | 307  | Low     | Low     | Low  | Low     | High    | Low  |
| Leiter 2014               | NCT01098539    | 495  | Low     | Low     | Low  | Low     | Low     | Low  |
| Leiter 2014a              | NCT01042977    | 965  | Low     | Low     | Low  | Unclear | Low     | Low  |
| Leonhardt 1991            | Not applicable | 94   | Unclear | Low     | Low  | Unclear | Low     | High |
| Lewin 2007                | Not provided   | 575  | Unclear | Low     | Low  | Unclear | High    | High |
| Lewin 2015                | NCT01422876    | 398  | Low     | Low     | Low  | Unclear | Low     | Low  |
| Li 2014                   | Not provided   | 203  | Low     | Unclear | High | Unclear | High    | High |
| Li 2014b                  | Not provided   | 42   | Unclear | Unclear | High | Unclear | Unclear | High |
| Li 2017                   | Not provided   | 33   | Unclear | Low     | Low  | Unclear | Low     | High |
| Li 2019                   | Not provided   | 64   | Unclear | Unclear | High | Unclear | Low     | High |
| Li 2019a                  | NCT01644500    | 23   | Unclear | Unclear | High | Unclear | Unclear | High |
| Li 2020                   | NCT02655757    | 149  | Low     | Unclear | High | Low     | High    | Low  |
| LIBRA                     | NCT01270789    | 51   | Low     | Low     | Low  | Unclear | Low     | High |
| Lim 2017                  | Not applicable | 170  | Unclear | Low     | Low  | Unclear | Low     | High |
| Lin 2003                  | Not applicable | 65   | Unclear | Low     | Low  | Unclear | High    | Low  |
| Linagliptin-LTC Trial     | NCT02061969    | 140  | Low     | Low     | High | Unclear | Low     | Low  |
| Lindström 1999            | Not applicable | 107  | Unclear | Low     | Low  | Unclear | High    | High |
| Lingvay 2018              | NCT02461589    | 641  | Low     | Low     | Low  | Unclear | Low     | Low  |
| LIPER2                    | EudraCT number | 24   | Unclear | Low     | Low  | Unclear | High    | High |
| Liraglutide-Detemir Study | NCT00856986    | 323  | Unclear | Low     | Low  | Unclear | High    | Low  |
| LIRA-ADD2SGLT2i           | NCT02964247    | 303  | Low     | Low     | Low  | Unclear | Low     | Low  |
| LIRA-RENAL                | NCT01620489    | 277  | Low     | Low     | Low  | Unclear | High    | Low  |
| LIRA-SWITCH               | NCT01907854    | 406  | Low     | Low     | Low  | Unclear | High    | High |
| Liu 2013                  | NCT01195090    | 119  | Unclear | Unclear | High | Unclear | Low     | High |
| Liu 2014                  | Not provided   | 146  | Low     | Low     | Low  | Unclear | Low     | High |
| Liu 2020                  | NCT02303730    | 71   | Low     | Low     | High | Unclear | High    | Low  |
| Liutkus 2010              | Not provided   | 165  | Unclear | Low     | Low  | Unclear | High    | Low  |
| LixiLan-G                 | NCT02787551    | 514  | Low     | Low     | High | Low     | Low     | Low  |
| LixiLan JP-L              | NCT02752412    | 512  | Low     | Low     | High | Unclear | Low     | Low  |
| LixiLan JP-O1             | NCT02749890    | 321  | Low     | Low     | High | Unclear | High    | Low  |
| LixiLan JP-O2             | NCT02752828    | 521  | Low     | Low     | High | Unclear | Low     | Low  |
| LixiLan-L                 | NCT02058160    | 736  | Low     | Low     | High | Low     | Low     | Low  |
| Lou 2020                  | Not reported   | 86   | Unclear | Unclear | High | Unclear | Unclear | High |
| Lu 2016                   | NCT01505426    | 170  | Low     | Low     | Low  | Unclear | High    | High |
| Lukashevich 2011          | Not provided   | 515  | Unclear | Low     | Low  | Unclear | Low     | High |
| Lund 2009                 | NCT00118963    | 101  | Low     | Low     | Low  | Unclear | Low     | High |
| LYDIA                     | NCT02043054    | 76   | Low     | Low     | High | Unclear | High    | Low  |
| Ma 2015                   | Not provided   | 60   | Unclear | Unclear | High | Unclear | Low     | High |
| Macauley 2015             | NCT01356381    | 44   | Unclear | Low     | Low  | Unclear | Low     | High |
| Madsbad 2001              | Not applicable | 256  | Unclear | Low     | Low  | Unclear | High    | High |
| Maffioli 2013             | Not provided   | 170  | Unclear | Low     | Low  | Unclear | Low     | High |
| MAGNA VICTORIA            | NCT01761318    | 49   | Unclear | Low     | Low  | Unclear | Low     | High |
| Marbury 1999              | Not applicable | 576  | Unclear | Low     | Low  | Unclear | High    | Low  |
| MARCH                     | ChiCTR-TRC-    | 784  | Low     | Low     | Low  | Unclear | High    | Low  |
| Marena 1993               | Not applicable | 20   | Unclear | Low     | Low  | Unclear | Unclear | High |
| Mari 2008                 | NCT00101712    | 306  | Unclear | Low     | Low  | Unclear | High    | High |
| MARLINA-T2D               | NCT01792518    | 360  | Unclear | Low     | Low  | Unclear | Unclear | High |
| Marre 2002                | Not applicable | 468  | Low     | Low     | Low  | Unclear | Low     | High |
| Maruyama 2019             | Not provided   | 44   | Unclear | Unclear | High | Unclear | Unclear | High |
| MASTER                    | UMIN00001671   | 28   | Unclear | Unclear | High | Unclear | Low     | High |



|                            |                |      |         |         |         |         |         |      |
|----------------------------|----------------|------|---------|---------|---------|---------|---------|------|
| Mathieu 2015               | NCT01462266    | 658  | Unclear | Low     | Low     | Unclear | Low     | Low  |
| Mathieu 2016               | NCT01646320    | 320  | Unclear | Low     | Low     | Unclear | Low     | Low  |
| Matthaei 2015              | NCT01619059    | 322  | Unclear | Low     | Low     | Unclear | Low     | Low  |
| Matthaei 2015a             | NCT01392677    | 218  | Low     | Low     | Low     | Unclear | Low     | High |
| Matthews 2005              | Not applicable | 630  | Unclear | Low     | Low     | Unclear | High    | Low  |
| Matthews 2010              | EudraCT 2004-  | 3118 | Unclear | Low     | Low     | Unclear | High    | Low  |
| Mattoo 2005                | Not applicable | 289  | Low     | Low     | Low     | Unclear | Low     | High |
| McCluskey 2004             | Not applicable | 40   | Unclear | Low     | Low     | Unclear | Low     | High |
| McGill 2013                | Not provided   | 133  | Unclear | Low     | Low     | Low     | High    | Low  |
| McGuire 2010               | NCT00424762    | 150  | Unclear | Low     | Low     | Unclear | High    | High |
| MDI Liraglutide            | EudraCT 2012-  | 124  | Unclear | Low     | Low     | Unclear | Low     | High |
| Meneghini 2010             | Not provided   | 247  | Unclear | Unclear | High    | Unclear | High    | High |
| Meneilly 2000              | Not applicable | 45   | Unclear | Low     | Low     | Unclear | Unclear | High |
| Milovanova 2019            | Not provided   | 42   | Unclear | Unclear | High    | Unclear | Unclear | High |
| Mita 2007                  | Not provided   | 70   | Low     | Unclear | High    | Unclear | Low     | High |
| Mita 2019                  | UMIN00022953   | 43   | Unclear | Unclear | High    | Unclear | Low     | High |
| Mitrakou 1998              | Not applicable | 120  | Unclear | Low     | Low     | Unclear | Low     | High |
| Miyagawa 2015              | NCT01558271    | 492  | Low     | Low     | Low     | Low     | Low     | Low  |
| Miyazaki 2002              | Not applicable | 58   | Low     | Low     | High    | Unclear | Unclear | High |
| Mokta 2018                 | Not provided   | 217  | Unclear | Unclear | High    | Unclear | Low     | High |
| Moretto 2008               | NCT00381342    | 233  | Low     | Low     | Low     | Unclear | Low     | Low  |
| Morino 2018                | Not provided   | 46   | Unclear | Unclear | High    | Unclear | Unclear | High |
| Moriwaki 2018              | UMIN00012562   | 28   | Unclear | Unclear | High    | Unclear | Low     | High |
| Moses 2014                 | Not provided   | 257  | Unclear | Low     | Low     | Unclear | Low     | Low  |
| Moses 2016                 | NCT01076075    | 427  | Unclear | Low     | Low     | Unclear | High    | Low  |
| Mu 2017                    | NCT01708902    | 436  | Unclear | Low     | Low     | Unclear | Low     | Low  |
| Müller-Wieland 2018        | NCT02471404    | 939  | Low     | Low     | Low     | Unclear | High    | Low  |
| Nakamura 2001              | Not applicable | 28   | Unclear | Low     | Low     | Unclear | Low     | High |
| Nakamura 2004              | Not applicable | 45   | Unclear | Unclear | High    | Unclear | Low     | High |
| Nakamura 2006              | Not provided   | 68   | Unclear | Unclear | High    | Unclear | Low     | High |
| Nar 2009                   | Not provided   | 34   | Unclear | Unclear | High    | Unclear | Unclear | High |
| Nathan 1988                | Not applicable | 31   | Low     | Low     | Low     | Unclear | Unclear | High |
| Nauck 2007a                | Not provided   | 501  | Low     | Low     | High    | Unclear | High    | High |
| Nauck 2007b                | NCT00094770    | 1172 | Unclear | Low     | Low     | Unclear | High    | Low  |
| Nauck 2009                 | NCT00286442    | 527  | Low     | Low     | Low     | Unclear | High    | Low  |
| Nauck 2011                 | NCT00660907    | 814  | Low     | Low     | Low     | Unclear | High    | Low  |
| Nauck 2016                 | NCT01183013    | 544  | Low     | Low     | Low     | Unclear | High    | High |
| Neff 2016                  | NCT01847313    | 20   | Unclear | Unclear | Unclear | Unclear | High    | High |
| Negro 2005                 | Not applicable | 38   | Unclear | Unclear | High    | Unclear | Unclear | High |
| Ning 2016                  | NCT01582230    | 293  | Low     | Low     | Low     | Unclear | Low     | High |
| Nino 2017                  | NCT01733758    | 387  | Low     | Low     | Low     | Unclear | High    | Low  |
| Nishimura 2016             | UMIN00011420   | 40   | Unclear | Unclear | High    | Unclear | Low     | High |
| Nishio 2006                | Not provided   | 54   | Unclear | Unclear | High    | Unclear | Unclear | High |
| Nogueira 2014              | Not provided   | 35   | Unclear | Unclear | High    | Unclear | High    | High |
| Nowicki 2011               | NCT00614939    | 170  | Low     | Low     | Low     | Unclear | High    | Low  |
| Ogasawara 2009             | Not provided   | 54   | Unclear | Unclear | High    | Unclear | Low     | High |
| Oh 2019                    | NCT01370707    | 187  | Unclear | Low     | Low     | Unclear | High    | High |
| Ohira 2014                 | Not provided   | 70   | Unclear | Unclear | High    | Unclear | Unclear | High |
| Ohira 2014a                | Not provided   | 60   | Unclear | Low     | High    | Unclear | Low     | High |
| Omariglitin Study 015      | NCT01697592    | 585  | Low     | Low     | Low     | Unclear | Low     | Low  |
| Omarigliptin Protocol 2010 | NCT01703221    | 394  | Low     | Low     | Low     | Unclear | Low     | Low  |
| Onoue 2020                 | UMIN00014531   | 24   | Low     | Low     | High    | Unclear | Low     | High |
| Onuchin 2010               | None           | 184  | Unclear | Unclear | High    | High    | Low     | High |
| Osman 2004                 | Not applicable | 16   | Unclear | Low     | Low     | Unclear | Low     | Low  |
| Ovalle 2004                | Not applicable | 17   | Unclear | Unclear | High    | Unclear | Low     | High |
| Owens 2011                 | NCT00602472    | 1058 | Unclear | Low     | Low     | Unclear | Low     | High |
| Oyama 2008                 | Not provided   | 84   | Unclear | Low     | High    | Unclear | Unclear | High |
| Pagano 1995                | Not applicable | 96   | Unclear | Unclear | High    | Unclear | Low     | High |



|                      |                |      |         |         |      |         |         |      |
|----------------------|----------------|------|---------|---------|------|---------|---------|------|
| Pan 2008             | NCT00110240    | 661  | Unclear | Low     | Low  | Unclear | High    | Low  |
| Pan 2012             | Not provided   | 438  | Unclear | Low     | Low  | Unclear | Low     | Low  |
| Pan 2012a            | NCT00698932    | 568  | Low     | Low     | Low  | Unclear | High    | Low  |
| Pan 2015             | Not provided   | 461  | Unclear | Low     | Low  | Unclear | Unclear | High |
| Park 2011            | Not provided   | 68   | Unclear | Unclear | High | Unclear | Unclear | High |
| Park 2014            | NCT00708578    | 67   | Unclear | Unclear | High | Unclear | Low     | High |
| Park 2017            | NCT02946541    | 160  | Unclear | Low     | Low  | Unclear | High    | High |
| Parmar Vinendra 2019 | Not provided   | 130  | Unclear | Unclear | High | Unclear | Low     | Low  |
| Parthan 2018         | NCT02097342    | 30   | Low     | Low     | High | Unclear | High    | High |
| Patel 2013           | Not provided   | 219  | Unclear | Low     | Low  | Unclear | High    | High |
| Pavithra 2019        | Not provided   | 80   | Unclear | Unclear | High | Unclear | Unclear | High |
| Pavo 2003            | Not applicable | 206  | Unclear | Low     | Low  | Unclear | Low     | High |
| Perez 2009           | NCT00727857    | 399  | Unclear | Low     | Low  | Unclear | High    | Low  |
| PERISCOPE            | NCT00225277    | 547  | Low     | Low     | Low  | Low     | High    | Low  |
| Periello 2006        | Not provided   | 283  | Unclear | Low     | Low  | Unclear | Unclear | High |
| Petrica 2009         | Not provided   | 44   | Unclear | Unclear | High | High    | Low     | High |
| Petrica 2011         | Not provided   | 78   | Unclear | Unclear | High | Unclear | Low     | High |
| Philis-Tsimikas 2013 | NCT01046110    | 458  | Low     | Low     | High | Low     | High    | Low  |
| Phillips 2001        | Not applicable | 908  | Unclear | Low     | Low  | Unclear | High    | High |
| Phillips 2003        | Not applicable | 83   | Unclear | Low     | Low  | Unclear | High    | High |
| Phrommintikul 2019   | NCT03178591    | 49   | Low     | Low     | Low  | Unclear | High    | Low  |
| PIOCOMB              | Not provided   | 82   | Unclear | Low     | Low  | Unclear | Unclear | High |
| PIOfix               | NCT00770653    | 305  | Unclear | Low     | Low  | Unclear | High    | High |
| Pioglitazone 001     | Not applicable | 399  | Unclear | Low     | Low  | Unclear | High    | High |
| PIONEER              | Not applicable | 173  | Unclear | Unclear | High | Unclear | High    | High |
| PIONEER 1            | NCT02906930    | 703  | Low     | Low     | Low  | Low     | Low     | Low  |
| PIONEER 2            | NCT02863328    | 822  | Low     | Low     | High | Low     | High    | Low  |
| PIONEER 3            | NCT02607865    | 1864 | Low     | Low     | Low  | Low     | Low     | Low  |
| PIONEER 4            | NCT02863419    | 711  | Low     | Low     | Low  | Low     | Low     | Low  |
| PIONEER 5            | NCT02827708    | 324  | Low     | Low     | Low  | Low     | Low     | Low  |
| PIONEER 6            | NCT02692716    | 3183 | Low     | Low     | Low  | Low     | Low     | Low  |
| PIONEER 7            | NCT02849080    | 504  | Low     | Low     | Low  | Low     | High    | Low  |
| PIONEER 8            | NCT03021187    | 731  | Low     | Low     | Low  | Low     | Low     | Low  |
| PIONEER 9            | NCT03018028    | 243  | Low     | Low     | Low  | Low     | Low     | Low  |
| PioRAGE              | UMIN000002055  | 63   | Low     | Unclear | High | Unclear | Low     | High |
| PIRAMID 2009         | ISRCTN53177482 | 78   | Unclear | Low     | Low  | Unclear | Low     | High |
| Pistrosch 2012       | NCT00324675    | 28   | Unclear | Low     | Low  | Unclear | Unclear | High |
| Pistrosch 2013       | NCT00857870    | 75   | Unclear | Unclear | High | Unclear | High    | High |
| Pi-Sunyer 2007       | NCT00120536    | 354  | Unclear | Low     | Low  | Unclear | High    | High |
| Pop-Busui 2009       | NCT00549874    | 27   | Unclear | Unclear | High | Unclear | High    | High |
| POPPS                | Not provided   | 97   | Unclear | Unclear | High | Unclear | Unclear | High |
| Pratley 2014         | NCT01023581    | 559  | Unclear | Low     | Low  | Low     | High    | Low  |
| PRESERVE-beta        | Not applicable | 428  | Unclear | Low     | Low  | Unclear | High    | High |
| PREVENT-J            | UMIN000021552  | 278  | Unclear | Unclear | High | Unclear | High    | High |
| PRIDE                | Not provided   | 94   | Low     | Unclear | High | Unclear | High    | Low  |
| PRIME-V study        | UMIN000015170  | 98   | Unclear | Unclear | High | Unclear | Low     | High |
| PRISMA               | NCT00772174    | 213  | Unclear | Low     | Low  | Unclear | Low     | Low  |
| PROactive            | NCT00174993    | 5238 | Low     | Low     | Low  | Low     | Low     | Low  |
| PROLOGUE             | UMIN000004490  | 463  | Low     | Low     | High | Low     | Low     | Low  |
| QUARTER              | Not applicable | 1194 | Low     | Low     | Low  | Unclear | Low     | High |
| Quatraro 1986        | Not applicable | 30   | Unclear | Unclear | High | Unclear | Unclear | High |
| Raghuv eer 2020      | Not provided   | 100  | Unclear | Unclear | High | Unclear | Unclear | High |
| Rahman 2010          | NCT00489229    | 22   | Unclear | Low     | Low  | Unclear | Low     | Low  |
| Rahman 2011          | Not provided   | 204  | Unclear | Unclear | High | Unclear | Unclear | High |
| Raji 2018            | Not provided   | 613  | Unclear | Unclear | high | Unclear | Unclear | High |
| Raskin 2001          | Not applicable | 318  | Low     | Low     | Low  | Unclear | High    | High |
| Raskin 2004          | Not applicable | 125  | Unclear | Unclear | High | Unclear | High    | High |
| Raskin 2009          | Not provided   | 657  | Unclear | Unclear | High | Unclear | High    | Low  |

|                  |                 |       |         |         |         |         |         |      |
|------------------|-----------------|-------|---------|---------|---------|---------|---------|------|
| Raz 2008         | NCT00337610     | 190   | Low     | Low     | Low     | Unclear | Low     | Low  |
| RECORD           | NCT00379769     | 4447  | Unclear | Unclear | High    | Low     | Low     | Low  |
| REGO-F           | NCT02397421     | 56    | Unclear | Unclear | High    | Unclear | High    | High |
| REFORM           | UMIN000018321   | 72    | Low     | Low     | Low     | Unclear | Unclear | Low  |
| RELEASE          | NCT02015299     | 44    | Unclear | Low     | Low     | Unclear | High    | High |
| RESULT           | Not provided    | 227   | Unclear | Low     | Low     | Unclear | High    | Low  |
| REWIND           | NCT01394952     | 9901  | Low     | Low     | Low     | Low     | Low     | Low  |
| Reynolds 2002    | Not applicable  | 18    | Unclear | Unclear | High    | Unclear | High    | High |
| Reynolds 2007    | Not provided    | 40    | Unclear | Unclear | High    | Unclear | Low     | High |
| Ristic 2006      | Not provided    | 262   | Low     | Low     | Low     | Unclear | High    | Low  |
| Robbins 2007     | NCT00191464     | 317   | Unclear | Low     | High    | Unclear | High    | High |
| Roberts 2005     | Not applicable  | 168   | Unclear | Low     | Low     | Unclear | High    | Low  |
| Rodbard 2016     | Not provided    | 216   | Low     | Low     | Low     | Unclear | High    | High |
| Rosenstock 1998  | Not applicable  | 148   | Unclear | Low     | Low     | Unclear | High    | High |
| Rosenstock 2006  | Not provided    | 313   | Unclear | Low     | Low     | Unclear | High    | Low  |
| Rosenstock 2007  | NCT00099918     | 786   | Unclear | Low     | Low     | Unclear | Low     | Low  |
| Rosenstock 2007a | NCT00101803     | 315   | Unclear | Low     | Low     | Unclear | High    | High |
| Rosenstock 2009  | NCT00286429     | 390   | Low     | Low     | Low     | Unclear | High    | Low  |
| Rosenstock 2010  | NCT00395512     | 327   | Unclear | Low     | Low     | Unclear | High    | High |
| Rosenstock 2012  | NCT00683878     | 420   | Unclear | Low     | Low     | Unclear | High    | Low  |
| Rosenstock 2013  | NCT00707993     | 441   | Unclear | Low     | Low     | Unclear | High    | Low  |
| Rosenstock 2015  | NCT01606007     | 355   | Unclear | Low     | Low     | Unclear | High    | Low  |
| Rosenstock 2016  | NCT01809327     | 712   | Low     | Low     | Low     | Unclear | Low     | Low  |
| Rosenstock 2019  | NCT02681094     | 590   | Low     | Low     | Low     | Unclear | Low     | Low  |
| Ross 2015        | NCT01512979     | 316   | Low     | Low     | Low     | Unclear | High    | Low  |
| SAIS1            | UMIN000004955   | 103   | Unclear | Unclear | High    | Unclear | High    | Low  |
| Saleem 2011      | Not provided    | 100   | Unclear | Unclear | High    | Unclear | Unclear | High |
| Salman 2001      | Not applicable  | 57    | Unclear | Unclear | High    | Unclear | Low     | High |
| Saloranta 2002   | Not applicable  | 675   | Unclear | Low     | Low     | Unclear | Unclear | Low  |
| Samson 2011      | NCT01432405     | 21    | Low     | Low     | High    | High    | Unclear | High |
| Sato 2019        | UMIN000004985   | 41    | Unclear | Unclear | High    | Unclear | Unclear | High |
| SAVOR -TIMI 53   | NCT01107886     | 16492 | Low     | Low     | Low     | Low     | Low     | Low  |
| Saxagliptin 014  | NCT00121667     | 743   | Low     | Low     | Low     | Unclear | High    | Low  |
| SCALE Diabetes   | NCT01272232     | 855   | Low     | Low     | Low     | Unclear | Low     | Low  |
| Scherbaum 2002   | Not applicable  | 233   | Unclear | Low     | Low     | Unclear | High    | High |
| Scherbaum 2008   | NCT00101712     | 306   | Unclear | Low     | Low     | Unclear | Low     | Low  |
| Schweizer 2007   | NCT00099866     | 780   | Unclear | Low     | Low     | Unclear | High    | Low  |
| Schweizer 2009   | NCT00246619     | 335   | Unclear | Low     | Low     | Unclear | High    | Low  |
| Segal 1997       | Not applicable  | 119   | Unclear | Low     | Low     | Unclear | High    | High |
| Segal 2005       | Not applicable  | 139   | Unclear | Low     | Low     | Unclear | High    | Low  |
| Seino 2011       | NCT00395746     | 264   | Unclear | Low     | Low     | Unclear | High    | Low  |
| Seino 2014       | JapicCTI-111661 | 158   | Unclear | Low     | Low     | Unclear | Low     | Low  |
| Seino 2015       | JapicCTI-111507 | 221   | Unclear | Low     | Low     | Unclear | Low     | High |
| Seino 2016       | NCT01572740     | 257   | Low     | Low     | Low     | Unclear | Low     | Low  |
| Seino 2018       | NCT02254291     | 308   | Low     | Low     | High    | Low     | Low     | Low  |
| Shaddinger 2019  | NCT02683746     | 308   | Low     | Low     | Low     | Low     | High    | Low  |
| Shah 2011        | Not provided    | 200   | Unclear | Unclear | Unclear | Unclear | Unclear | High |
| Shankar 2017     | NCT01590797     | 467   | Unclear | Low     | Low     | Unclear | Low     | Low  |
| Shankar 2017a    | NCT01755156     | 402   | Unclear | Low     | Low     | Unclear | Low     | High |
| Shestakova 2018  | NCT02794792     | 165   | Low     | Low     | Low     | Unclear | Low     | Low  |
| Shibuya 2018     | UMIN000016090   | 32    | Unclear | Unclear | High    | Unclear | Low     | High |
| SIMPLE           | NCT01966978     | 120   | Unclear | Unclear | High    | Unclear | High    | Low  |
| Sit2Mix          | Not provided    | 389   | Unclear | Unclear | High    | Unclear | High    | High |
| Sitagliptin 019  | NCT00086502     | 353   | Unclear | Low     | Low     | Unclear | High    | High |
| Sitagliptin 020  | NCT0086515      | 701   | Unclear | Low     | Low     | Unclear | High    | High |
| Sitagliptin 021  | NCT00087516     | 726   | Unclear | Low     | Low     | Unclear | Low     | High |
| Sitagliptin 024  | NCT00094770     | 1172  | Unclear | Low     | Low     | Unclear | High    | Low  |
| Sitagliptin 035  | Not provided    | 441   | Low     | Low     | Low     | Unclear | High    | High |

|                             |                |       |         |         |           |         |         |      |
|-----------------------------|----------------|-------|---------|---------|-----------|---------|---------|------|
| Sitagliptin 036             | NCT00103857    | 355   | Unclear | Low     | Low       | Unclear | Low     | Low  |
| Sitagliptin 049             | NCT00449930    | 1050  | Low     | Low     | Low       | Unclear | High    | Low  |
| Sitagliptin 051             | NCT00395343    | 641   | Low     | Unclear | Unclear   | Unclear | Low     | Low  |
| SMART                       | NCT02243176    | 485   | Low     | Low     | High      | Unclear | Low     | Low  |
| Smith 2005                  | Not applicable | 48    | Unclear | Low     | Low       | Unclear | Unclear | High |
| Søfteland 2017              | NCT01734785    | 333   | Low     | Low     | Low       | Unclear | Low     | Low  |
| Sohn 2008                   | Not provided   | 19    | Unclear | Unclear | High      | Unclear | High    | High |
| Sone 2019                   | NCT02589639    | 266   | Low     | Low     | Low       | Unclear | Low     | Low  |
| South Danish Diabetes Study | Not provided   | 140   | Low     | Unclear | High      | High    | High    | High |
| SPEAD-A                     | UMIN00005311   | 341   | Unclear | Unclear | High      | Unclear | Low     | Low  |
| SPECIFY                     | NCT02280486    | 388   | Low     | Low     | High      | Unclear | High    | High |
| Spengler 1989               | Not applicable | 55    | Unclear | Unclear | High risk | Unclear | Unclear | High |
| SPIKE                       | UMIN00007396   | 282   | Unclear | Unclear | High      | Unclear | Low     | Low  |
| SPOTLIGHT                   | NCT01225081    | 152   | Unclear | Unclear | High      | Unclear | High    | High |
| SPREAD-DIMCAD               | NCT00513630    | 304   | Low     | Low     | Low       | Low     | Unclear | Low  |
| Sridhar 2013                | NCT01206400    | 50    | Unclear | Low     | Low       | Unclear | Low     | High |
| St. John Sutton 2002        | Not applicable | 203   | Unclear | Unclear | High      | Unclear | Unclear | High |
| Standl 1999                 | Not applicable | 48    | Unclear | Low     | Low       | Unclear | High    | High |
| Standl 2001                 | Not applicable | 133   | Unclear | Low     | Low       | Unclear | High    | High |
| START                       | NCT02273050    | 424   | Low     | Low     | Low       | Unclear | High    | Low  |
| START-J                     | NCT01183104;   | 305   | Low     | Unclear | High      | Unclear | Low     | Low  |
| Stewart 2006                | Not provided   | 526   | Unclear | Low     | Low       | Unclear | High    | High |
| Stocker 2007                | Not provided   | 92    | Low     | Unclear | High      | Unclear | High    | High |
| STOP-OB                     | UMIN000026161  | 64    | Unclear | Unclear | High      | Unclear | Low     | High |
| Strojek 2009                | NCT00469092    | 480   | Low     | Low     | High      | Unclear | Low     | Low  |
| Strojek 2011                | NCT00680745    | 596   | Low     | Low     | Low       | Unclear | Low     | Low  |
| Strøm Halden 2019           | NCT03157414    | 44    | Low     | Low     | Low       | Unclear | High    | Low  |
| Su 2014                     | Not provided   | 600   | Unclear | Low     | Low       | Unclear | High    | High |
| SUCCESS                     | UMIN000004675  | 119   | Unclear | Unclear | High      | Unclear | Low     | Low  |
| SUMER                       | Not provided   | 400   | Unclear | Unclear | High      | Unclear | High    | Low  |
| Sun 2006                    | Not provided   | 60    | Unclear | Unclear | Unclear   | Unclear | Low     | High |
| Sun 2016                    | ChiCTR-TRC-    | 108   | Unclear | Unclear | High      | Unclear | Low     | Low  |
| SUPER                       | NCT02104804    | 462   | Unclear | Low     | Low       | Unclear | Low     | Low  |
| SUSTAIN 1                   | NCT02054897    | 387   | Low     | Low     | Low       | Low     | Low     | Low  |
| SUSTAIN 2                   | NCT01930188    | 1225  | Low     | Low     | Low       | Unclear | High    | High |
| SUSTAIN 4                   | NCT02128932    | 1082  | Low     | Low     | Low       | Low     | Low     | Low  |
| SUSTAIN 5                   | NCT02305381    | 396   | Low     | Low     | Low       | Low     | Low     | Low  |
| SUSTAIN 6                   | NCT01720446    | 3297  | Low     | Low     | Low       | Low     | Low     | Low  |
| SUSTAIN 8                   | NCT03136484    | 788   | Low     | Low     | Low       | Low     | Low     | Low  |
| SUSTAIN 9                   | NCT03086330    | 302   | Low     | Low     | Low       | Low     | Low     | Low  |
| SUSTAIN CHINA MRCT          | NCT03061214    | 868   | Low     | Low     | Low       | Low     | High    | Low  |
| Suzuki 2014                 | Not provided   | 40    | Unclear | Unclear | High      | Unclear | High    | High |
| SWIM                        | NCT01341717    | 440   | Low     | Low     | High      | Unclear | Low     | High |
| Takagi 2003                 | Not applicable | 44    | Unclear | Unclear | High      | Unclear | Unclear | High |
| Takase 2007                 | Not provided   | 39    | Low     | Low     | High      | Unclear | Low     | High |
| Takashima 2018              | UMIN000031454  | 40    | Unclear | Unclear | High      | Unclear | Unclear | High |
| Tao 2018                    | ChiCTR-IPR-    | 42    | Low     | Unclear | High      | Unclear | High    | High |
| Taskinen 2011               | NCT00601250    | 700   | Unclear | Low     | Low       | Unclear | Low     | High |
| TECOS                       | NCT00790205    | 14671 | Low     | Low     | Low       | Low     | Low     | Low  |
| T-Emerge 1                  | NCT00744926    | 373   | Unclear | Low     | Low       | Unclear | High    | Low  |
| T-Emerge 3                  | NCT00744367    | 326   | Unclear | Low     | Low       | Unclear | High    | Low  |
| T-Emerge 4                  | NCT00754988    | 666   | Unclear | Low     | Low       | Unclear | Low     | High |
| T-Emerge 5                  | NCT00755287    | 1049  | Unclear | Unclear | High      | Unclear | High    | High |
| T-Emerge 6                  | NCT00909597    | 760   | Unclear | Low     | Low       | Unclear | High    | Low  |
| T-Emerge 7                  | NCT00823992    | 305   | Unclear | Unclear | Unclear   | Low     | High    | Low  |
| Teramoto 2007               | Not provided   | 92    | Unclear | Unclear | High      | Unclear | Low     | High |
| Teupe 1991                  | Not applicable | 100   | Unclear | Unclear | Unclear   | Unclear | High    | Low  |
| Thrasher 2014               | NCT01194830    | 226   | Low     | Low     | Low       | Unclear | Low     | Low  |

|                     |                  |      |         |         |         |         |         |      |
|---------------------|------------------|------|---------|---------|---------|---------|---------|------|
| TIDE                | NCT00879970      | 1332 | Unclear | Low     | Low     | Low     | High    | Low  |
| Tinahones 2017      | NCT01778049      | 478  | Low     | Low     | Low     | Unclear | Low     | Low  |
| Tofogliflozin 003   | Japic CTI-101349 | 220  | Unclear | Low     | Low     | Unclear | High    | Low  |
| Tolman 2009         | NCT00494312      | 2120 | Unclear | Low     | Low     | Unclear | High    | Low  |
| TOPSCORE            | UMIN000017861    | 75   | Unclear | Unclear | High    | Unclear | High    | High |
| TOSCA.IT            | NCT00700856      | 3028 | Low     | Low     | High    | Low     | High    | Low  |
| Tripathy 2013       | NCT01223196      | 29   | Unclear | Unclear | High    | Unclear | High    | High |
| TROICA              | NCT01990469      | 218  | Unclear | Low     | Low     | Unclear | High    | Low  |
| Truitt 2010         | NCT00143520      | 532  | Unclear | Low     | Low     | Unclear | High    | Low  |
| Türkmen Kemal 2007  | Not provided     | 46   | Unclear | Unclear | Unclear | Unclear | Low     | High |
| UKPDS 44            | Not applicable   | 1946 | Unclear | Low     | Low     | Unclear | High    | High |
| Umpierrez 2006      | Not provided     | 203  | Unclear | Unclear | High    | Unclear | High    | High |
| Vähätalo 2007       | Not provided     | 41   | Unclear | Unclear | Unclear | Unclear | Unclear | High |
| Van Eyk 2019        | NCT02660047      | 47   | Unclear | Low     | Low     | Low     | Low     | High |
| Van Gaal 2014       | NCT00976937      | 319  | Unclear | Low     | Low     | Unclear | High    | Low  |
| Vanderheiden 2016   | NCT01505673      | 71   | Low     | Low     | Low     | Unclear | Low     | High |
| Varghese 2009       | Not provided     | 57   | Unclear | Low     | Low     | Unclear | High    | High |
| Veleba 2015         | EudraCT number   | 69   | Low     | Unclear | High    | Unclear | High    | High |
| VERTIS Asia         | NCT02630706      | 506  | Low     | Low     | Low     | Low     | Low     | Low  |
| VERTIS CV           | NCT01986881      | 8246 | Low     | Low     | Low     | Low     | Low     | Low  |
| VERTIS FACTORIAL    | NCT02099110      | 745  | Low     | Low     | Low     | Unclear | Low     | Low  |
| VERTIS-MET          | NCT02033889      | 621  | Low     | Low     | Low     | Unclear | Low     | Low  |
| VERTIS MONO         | NCT01958671      | 461  | Low     | Low     | Low     | Unclear | Low     | Low  |
| VERTIS RENAL        | NCT01986855      | 467  | Low     | Low     | Low     | Unclear | High    | Low  |
| VERTIS SITA2        | NCT02036515      | 464  | Low     | Low     | Low     | Unclear | Low     | Low  |
| VERTIS SU           | NCT01999218      | 1326 | Low     | Low     | Low     | Unclear | High    | Low  |
| Vianna 2017         | NCT01679899      | 42   | Low     | Unclear | High    | Low     | Low     | High |
| VICTORY             | NCT00169832      | 193  | Unclear | Low     | Low     | Unclear | Low     | Low  |
| VISION              | NCT01541956      | 2985 | Unclear | Unclear | High    | Unclear | Low     | Low  |
| VIVIDD              | NCT00894868      | 254  | Low     | Low     | Low     | Low     | High    | Low  |
| Vongthavaravat 2002 | Not applicable   | 348  | Unclear | Unclear | High    | Unclear | High    | High |
| Wajcberg 2007       | Not provided     | 31   | Unclear | Low     | Low     | Unclear | Unclear | High |
| Wang 2005           | Not applicable   | 70   | Unclear | Unclear | High    | Unclear | Low     | Low  |
| Wang 2013           | Not provided     | 90   | Low     | Unclear | High    | Unclear | Low     | High |
| Wang 2015           | Not provided     | 90   | Unclear | Unclear | High    | Unclear | High    | High |
| Wang 2016           | NCT01215097      | 306  | Low     | Low     | Low     | Unclear | Low     | Low  |
| Wang 2016a          | Not provided     | 28   | Unclear | Unclear | Unclear | Unclear | Unclear | High |
| Wang 2017           | NCT01177384      | 381  | Low     | Low     | Low     | Unclear | High    | Low  |
| Wang 2019           | NCT01648582      | 744  | Low     | Low     | High    | Low     | Low     | Low  |
| Wang 2020           | Not provided     | 60   | Low     | Unclear | high    | Unclear | Unclear | High |
| Watanabe 2005       | Not applicable   | 27   | Unclear | Unclear | High    | Unclear | Low     | High |
| Wolever 2000        | Not applicable   | 152  | Unclear | Unclear | High    | Unclear | High    | High |
| Wolffenbuttel 1999  | Not applicable   | 310  | Unclear | Low     | Low     | Unclear | High    | High |
| Wolffenbuttel 2000  | Not applicable   | 584  | Unclear | Low     | Low     | Unclear | High    | High |
| Wong 2005           | Not applicable   | 52   | Low     | Unclear | High    | Unclear | Low     | Low  |
| Wu 2014             | Not applicable   | 93   | Unclear | Unclear | High    | Unclear | Unclear | High |
| Wu 2015             | Not provided     | 57   | Low     | Low     | Low     | Unclear | Low     | High |
| Xiao 2015           | Not provided     | 80   | Low     | Low     | High    | Unclear | Low     | High |
| Xiao 2016           | Not provided     | 41   | Low     | Low     | High    | Unclear | Low     | Low  |
| Xu 2017             | NCT017909305     | 2195 | Low     | Low     | High    | Unclear | Low     | Low  |
| Yakibu 2017         | ISCTRN33414972   | 366  | Low     | Unclear | High    | Unclear | Low     | High |
| Yale 2013           | Not provided     | 269  | Low     | Low     | Low     | Unclear | High    | High |
| Yamakage 2019       | UMIN000021479    | 54   | Low     | Low     | High    | Unclear | Low     | High |
| Yamamoto 2018       | UMIN000028313    | 25   | Unclear | Unclear | High    | Unclear | High    | High |
| Yamanouchi 2005     | Not applicable   | 114  | Low     | Low     | High    | Unclear | Low     | High |
| Yamasaki 2005       | Not applicable   | 103  | Unclear | Unclear | High    | Unclear | Unclear | High |
| Yan 2019            | NCT02147925      | 75   | Low     | Unclear | High    | Unclear | Low     | High |
| Yang 2002           | Not applicable   | 64   | Unclear | Low     | Low     | Unclear | Unclear | High |

|                   |                |      |         |         |         |         |         |      |
|-------------------|----------------|------|---------|---------|---------|---------|---------|------|
| Yang 2011         | NCT00661362    | 570  | Low     | Low     | Low     | Unclear | High    | Low  |
| Yang 2012         | NCT00813995    | 395  | Low     | Low     | Low     | Unclear | Low     | Low  |
| Yang 2013         | Not provided   | 182  | Unclear | Low     | Low     | Unclear | Low     | High |
| Yang 2015         | Not provided   | 109  | Unclear | Low     | Low     | Unclear | High    | High |
| Yang 2015a        | NCT01357252    | 279  | Unclear | Low     | Low     | Unclear | Low     | Low  |
| Yang 2016         | NCT01095666    | 444  | Low     | Low     | Low     | Unclear | High    | Low  |
| Yang 2018         | NCT02096705    | 272  | Low     | Low     | Low     | Unclear | Low     | Low  |
| Yee 2010          | NCT00231387    | 57   | Unclear | Low     | Low     | Unclear | Low     | Low  |
| Yki-Järvinen 1999 | Not applicable | 31   | Low     | Unclear | High    | Unclear | Low     | High |
| Yki-Järvinen 2013 | NCT00954447    | 1261 | Low     | Low     | Low     | Unclear | Low     | Low  |
| Yoon 2011         | NCT00397631    | 520  | Unclear | Low     | Low     | High    | High    | Low  |
| Yoon 2011a        | Not provided   | 349  | Unclear | Low     | Low     | Unclear | High    | High |
| Yuan 2012         | Not provided   | 59   | Low     | Unclear | High    | Unclear | Low     | High |
| Zang 2016         | NCT02008682    | 368  | Low     | Low     | Low     | Unclear | Low     | Low  |
| ZEUS II           | NCT02831361    | 283  | Low     | Low     | Low     | Unclear | Low     | Low  |
| Zhang 2020        | Not provided   | 60   | Low     | Low     | High    | Unclear | Unclear | High |
| Zheng 2019        | Not provided   | 91   | Unclear | Unclear | Unclear | Unclear | Unclear | High |
| Zhu 2003          | Not applicable | 554  | Unclear | Unclear | Unclear | Unclear | High    | Low  |
| Zib 2007          | Not provided   | 32   | Unclear | Unclear | High    | Unclear | Low     | High |

## Appendix 4 Network plots for each outcome

The size of the circle in each network is proportional to the number of participants randomly assigned to the treatment comparison. The width of each line is proportional to the number of trials comparing the two connected treatments. When a line is absent, this indicates that there were no head-to-head trials of the corresponding treatments reporting the outcome of interest. The number provided for each treatment class indicates the number of patients assigned to the treatment in the network.

**Figure 1 Network plot for all-cause mortality**

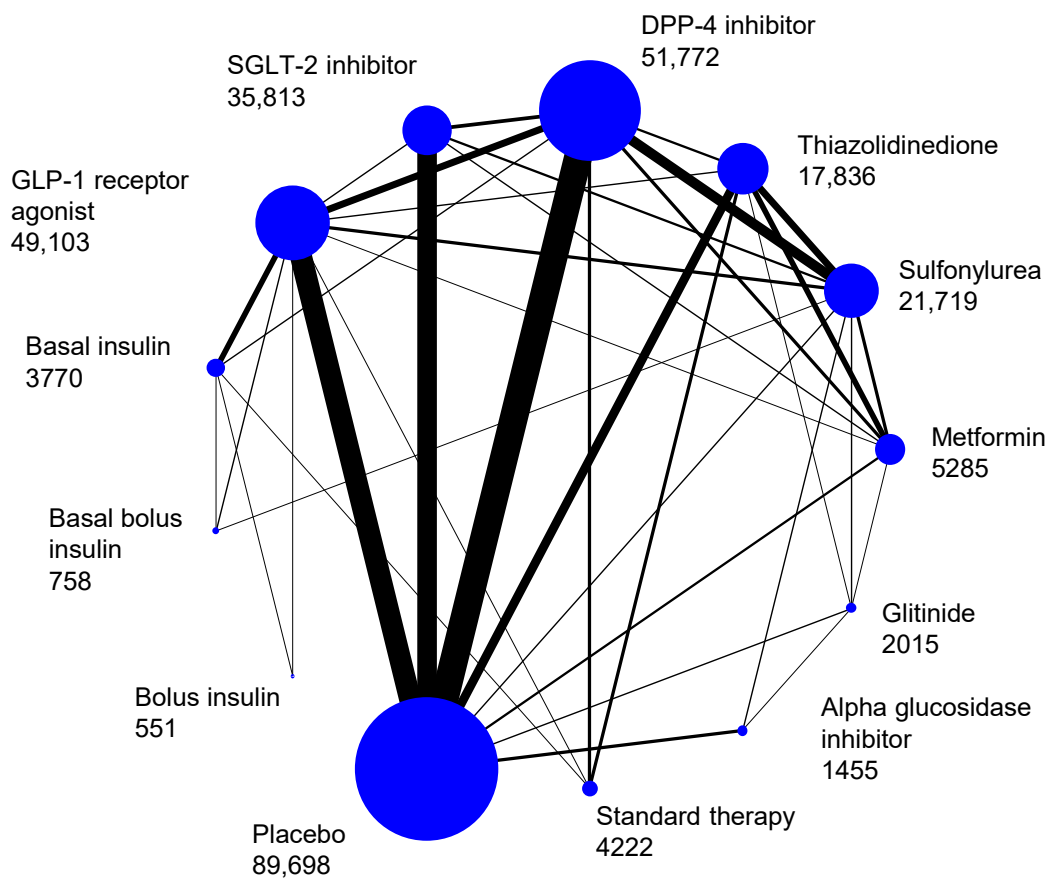

**Figure 2 Network plot for cardiovascular mortality**

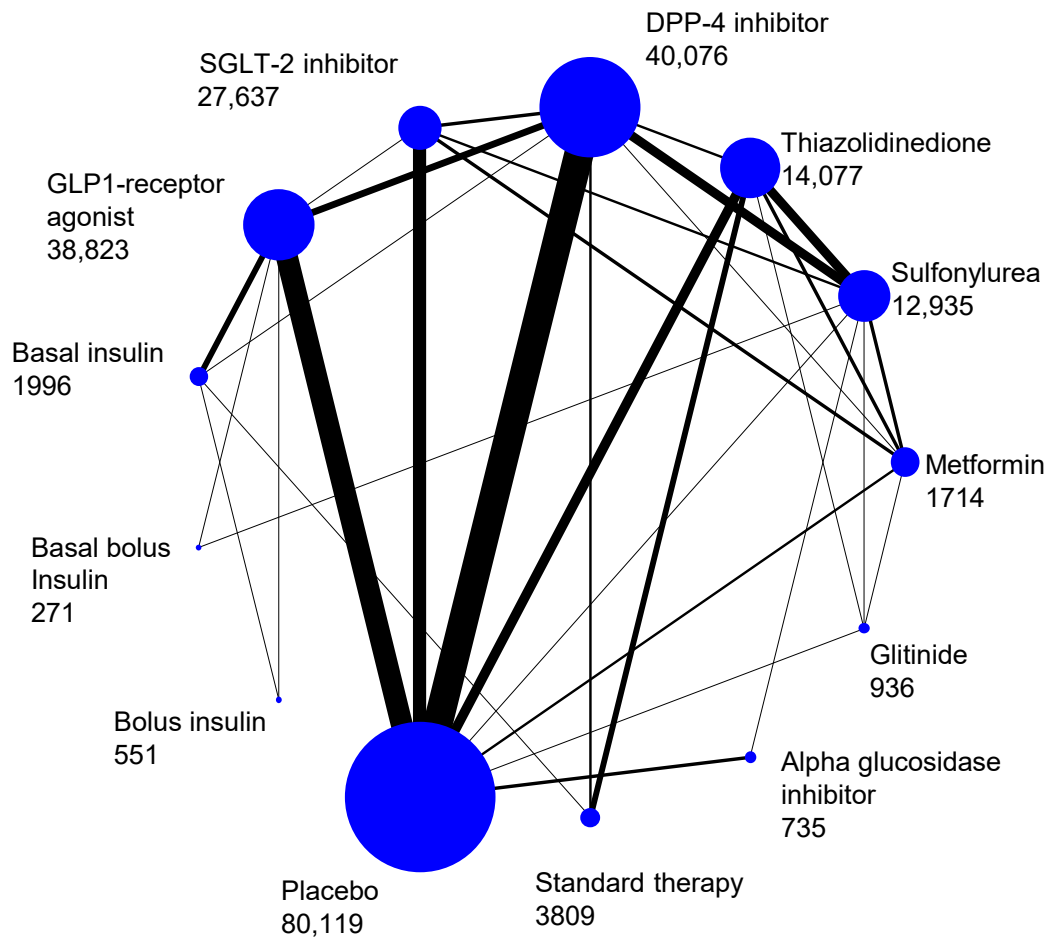

**Figure 3 Network plot for nonfatal myocardial infarction**

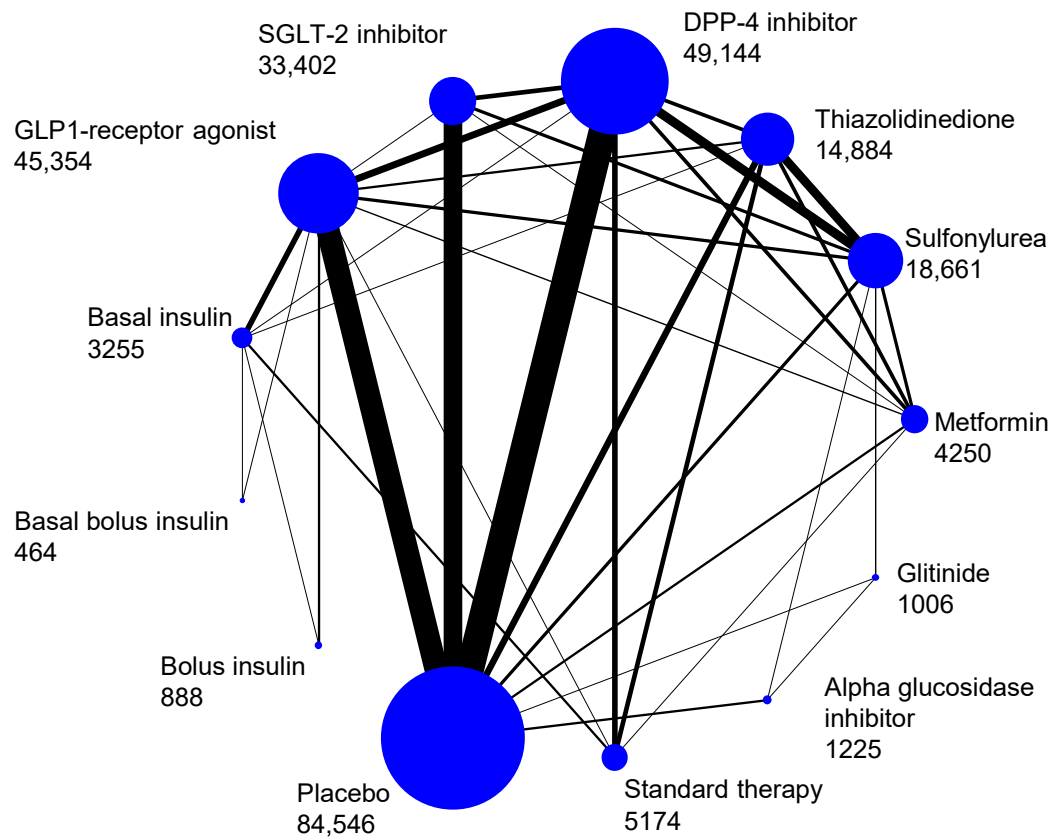



**Figure 4 Network plot for nonfatal stroke**

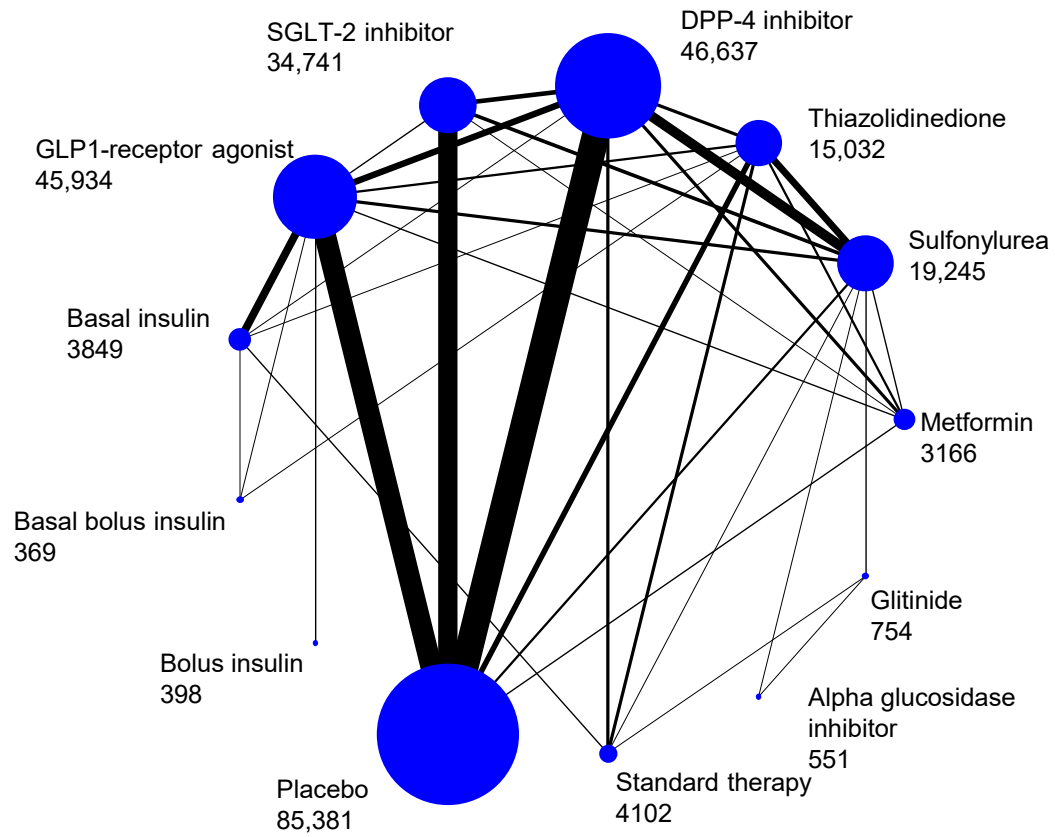

Figure 5 Network plot for kidney failure

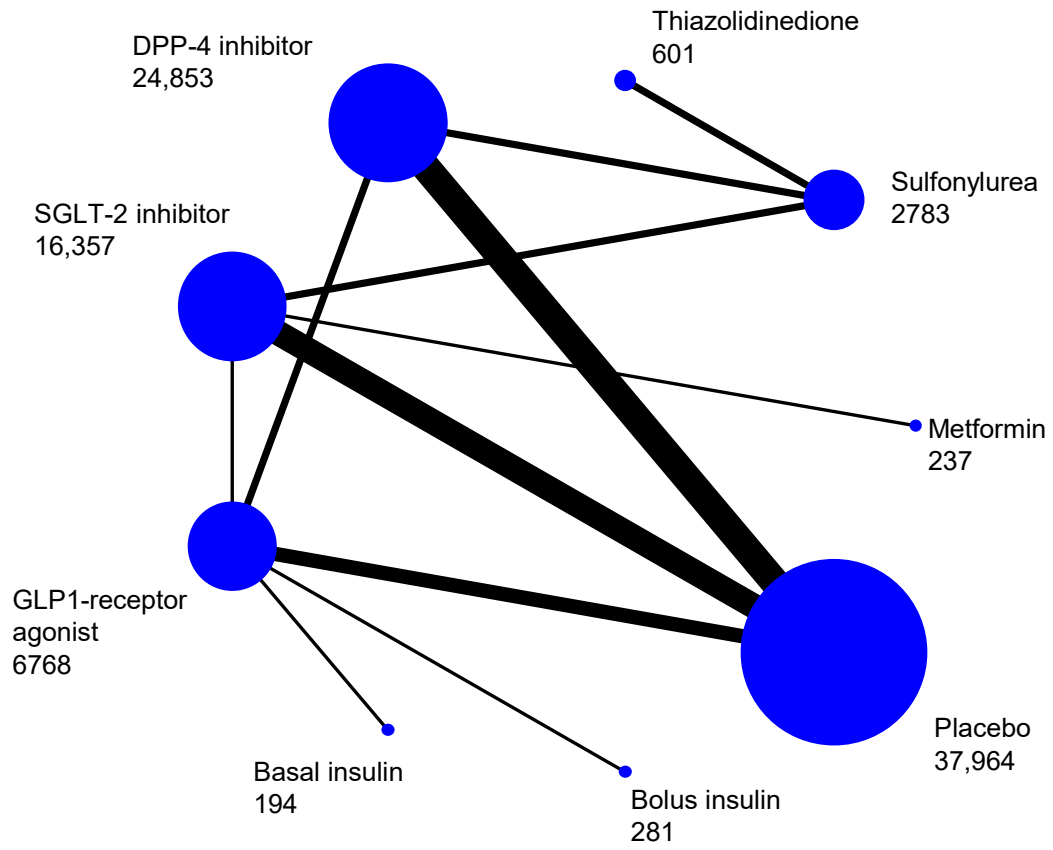

**Figure 6 Network plot for hospitalisation for heart failure**

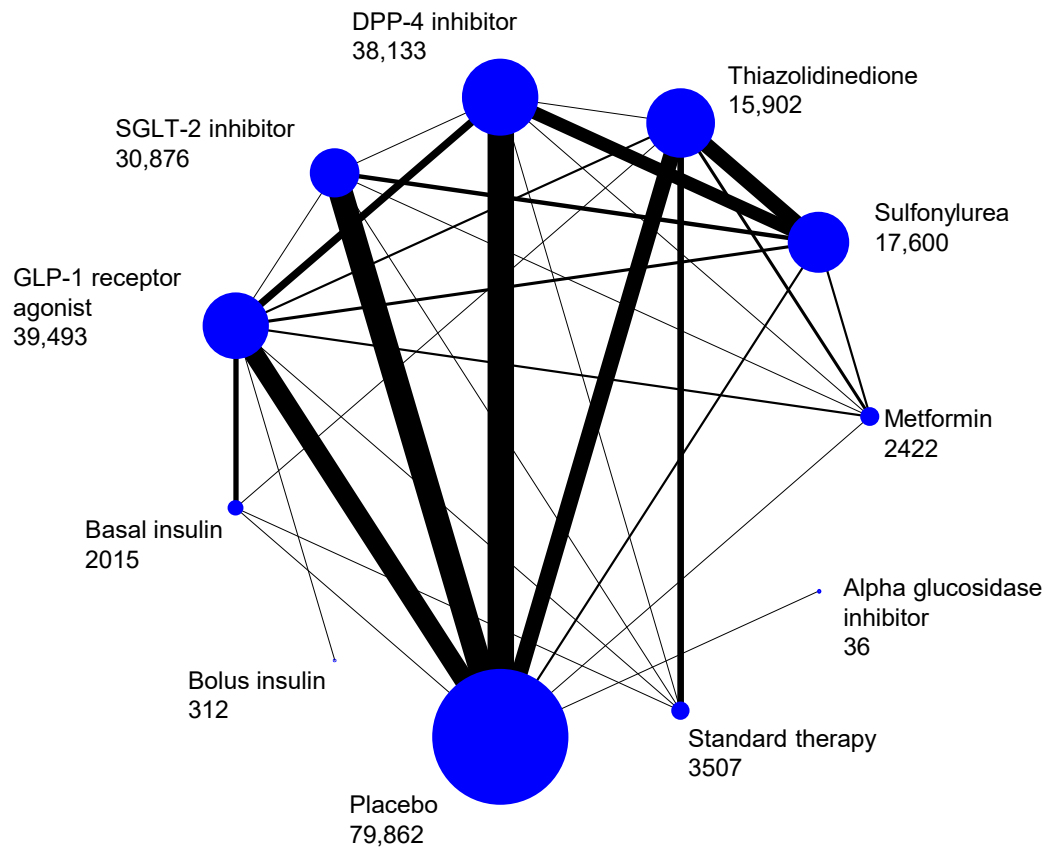

**Figure 7 Network plot for severe hypoglycaemia**

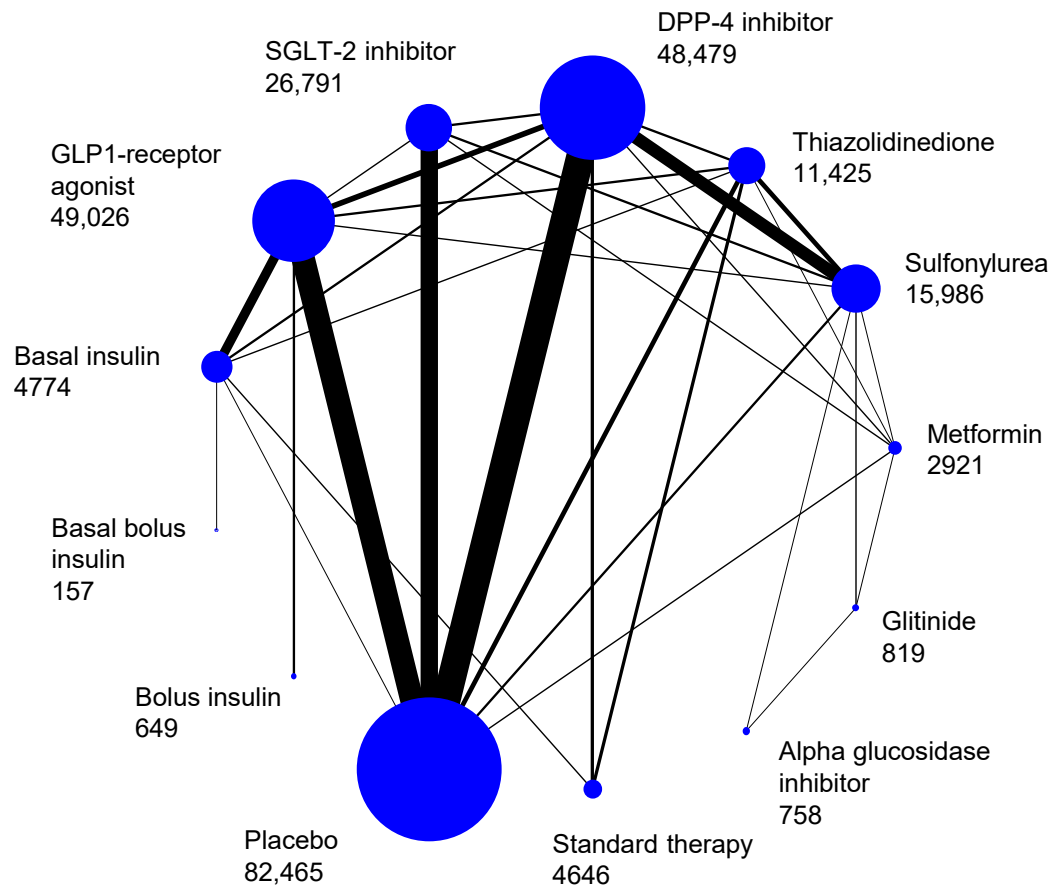

**Figure 8 Network plot for blindness**

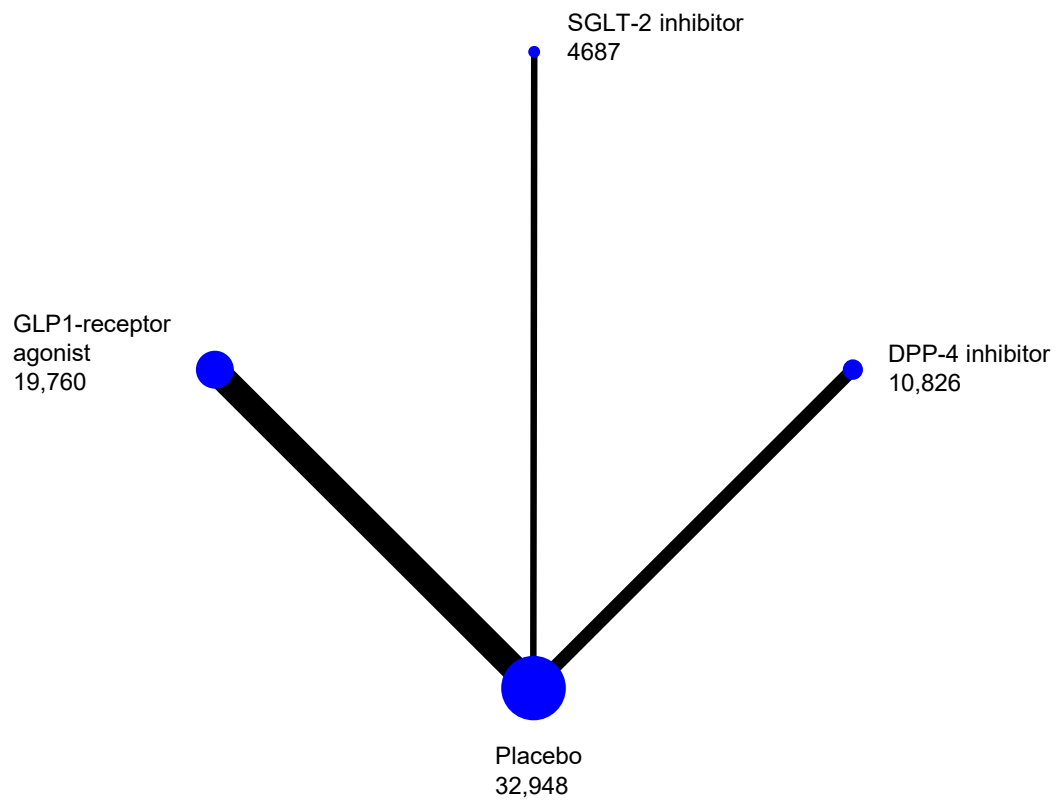

Figure 9 Network plot for health-related quality of life

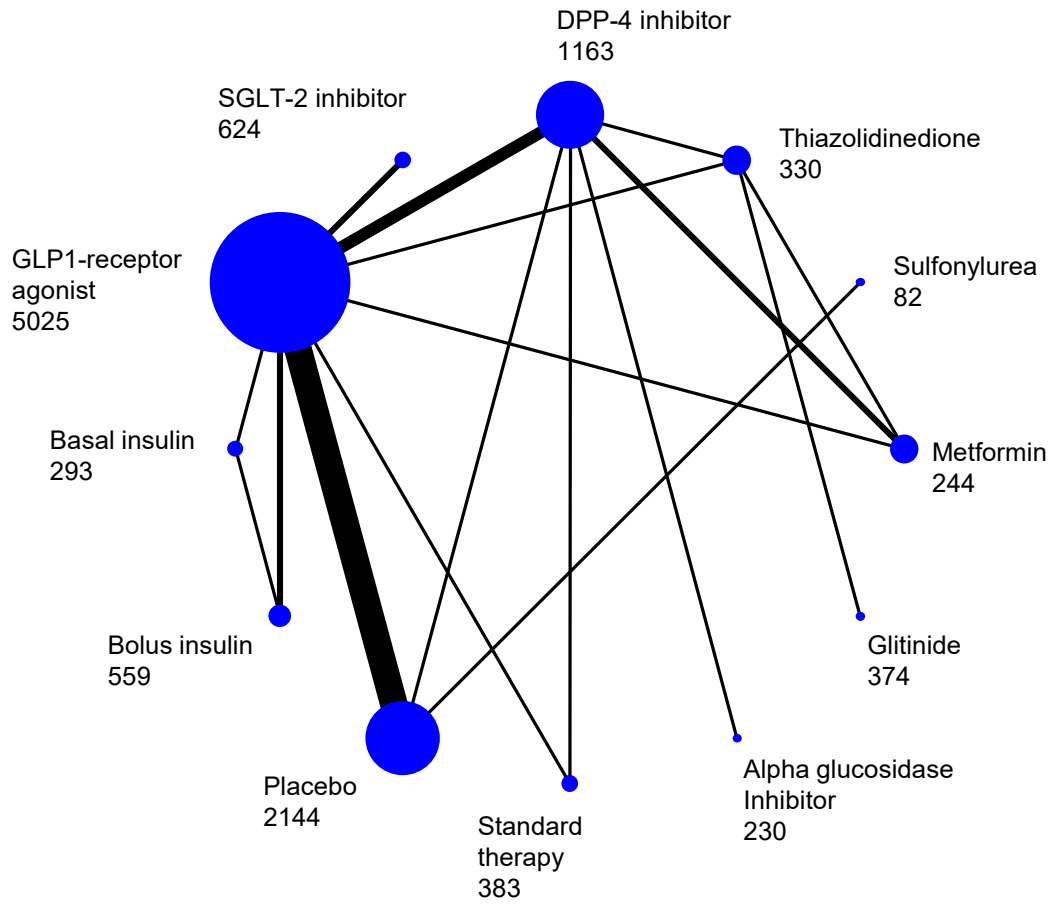

**Figure 10 Network plot for body weight**

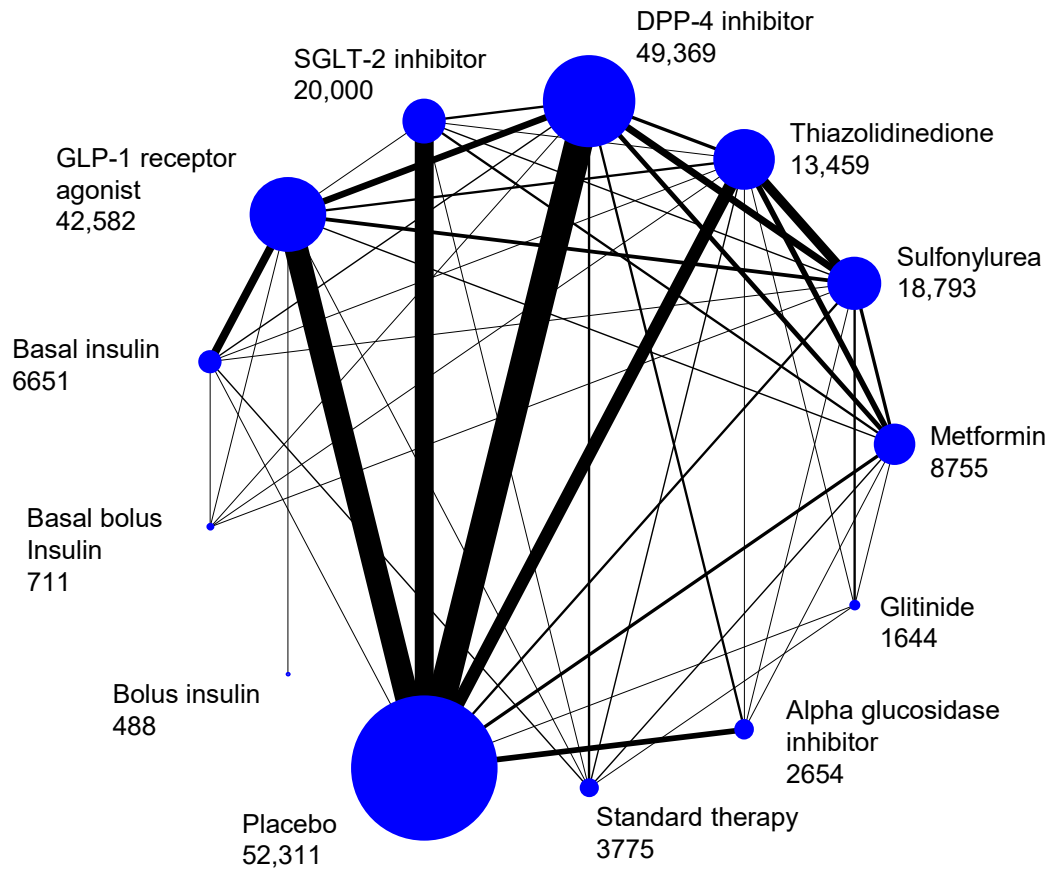

**Figure 11 Network plot for amputation**

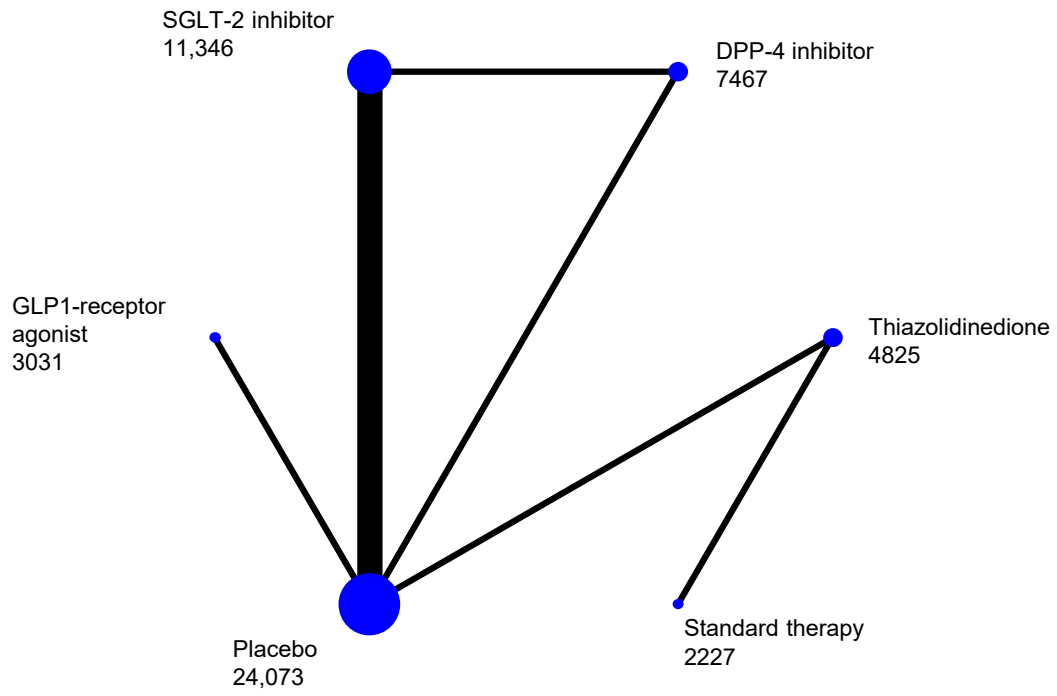



**Figure 12 Network plot for neuropathic pain**

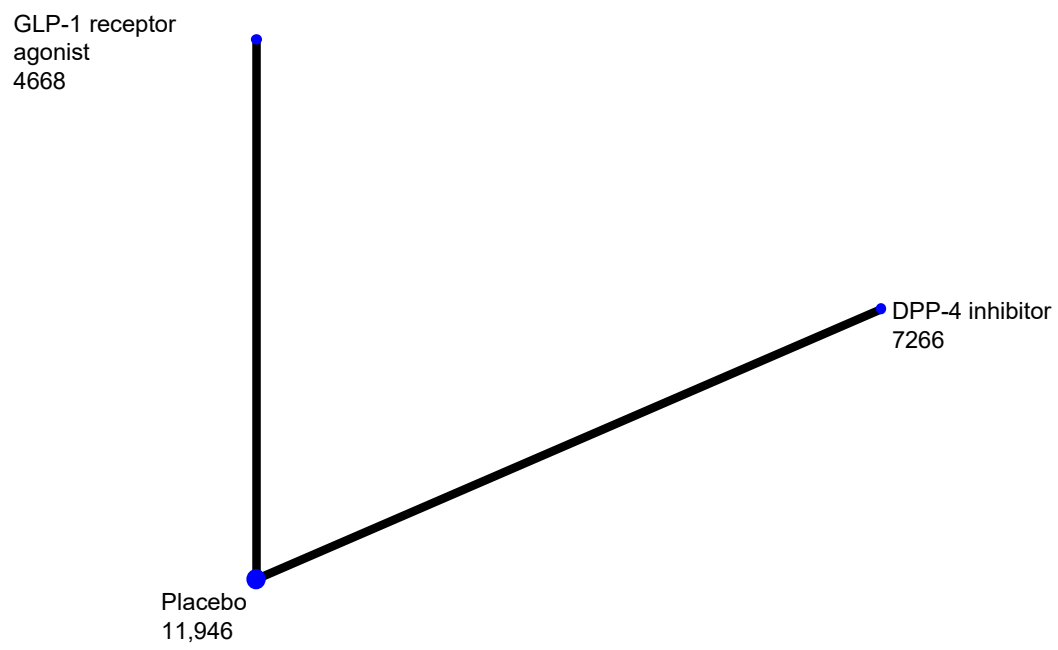

**Figure 13 Network plot for diabetic ketoacidosis**

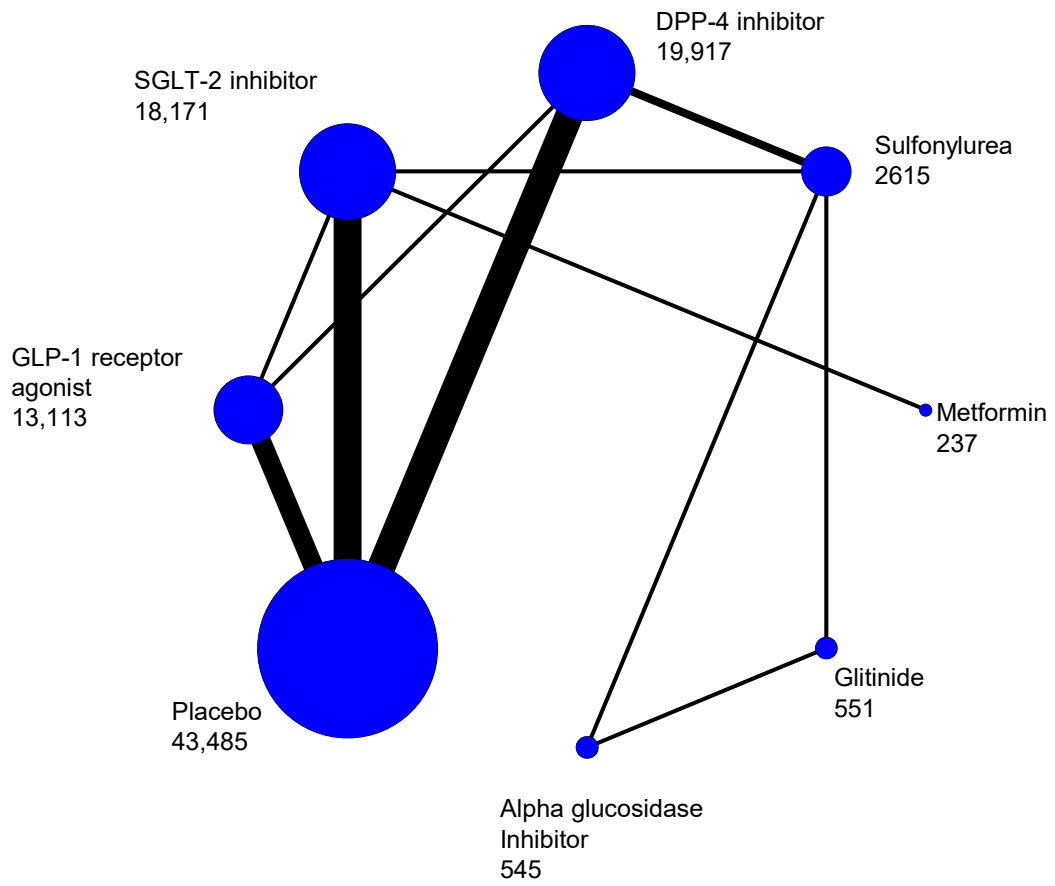

**Figure 14 Network plot for serious hyperglycaemia**

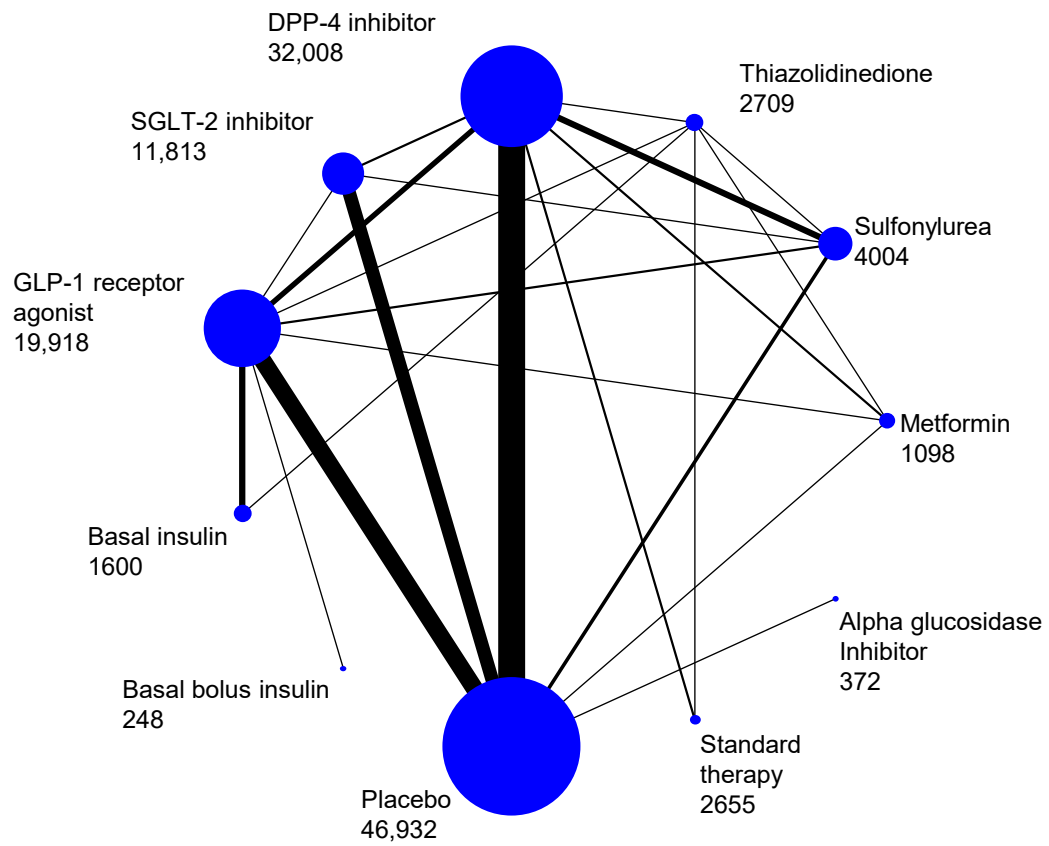

**Figure 15 Network plot for genital infection**

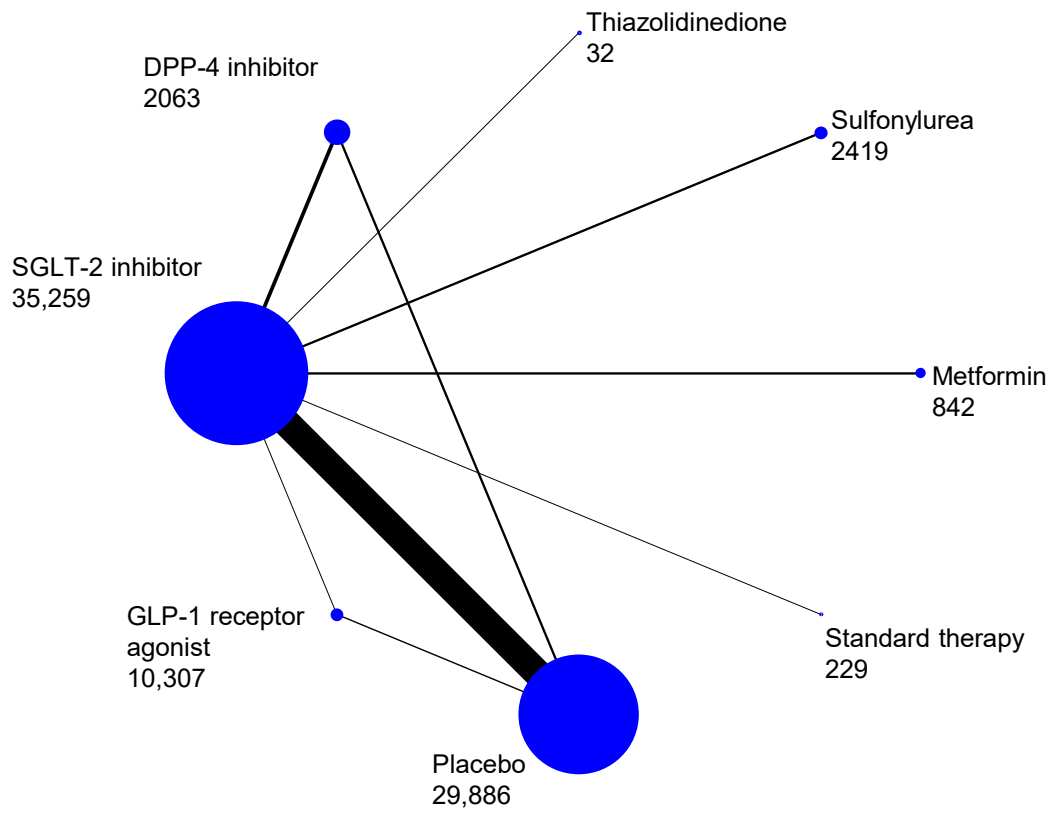

**Figure 16 Network plot for Fournier gangrene**

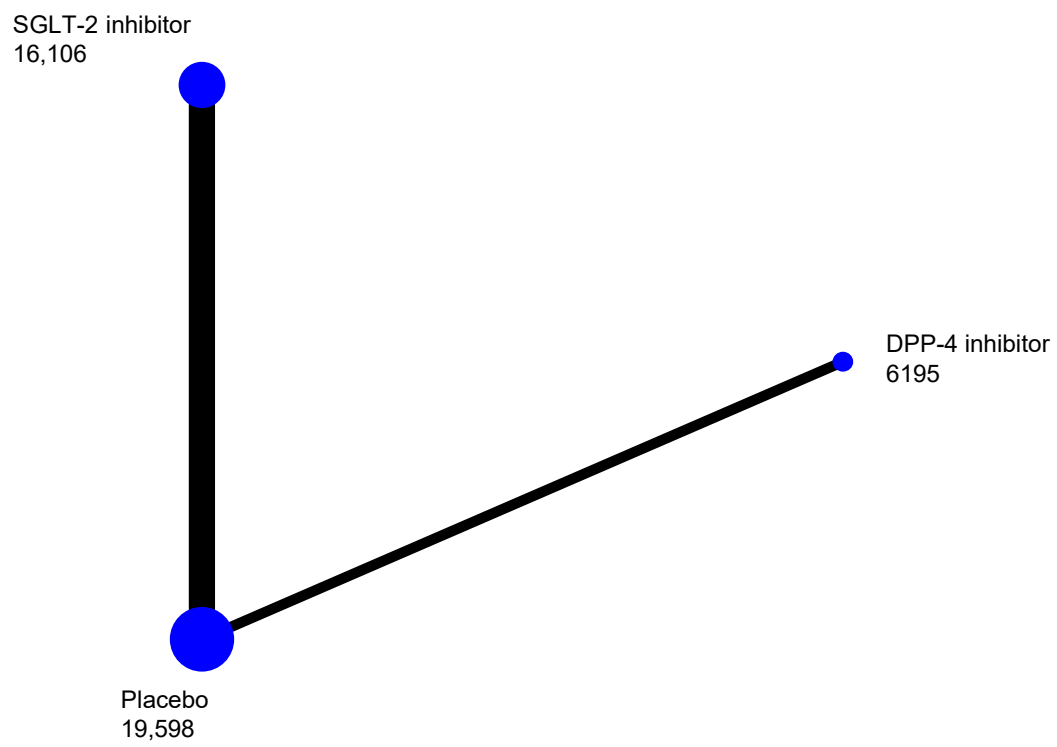

**Figure 17 Network plot for severe gastrointestinal events**

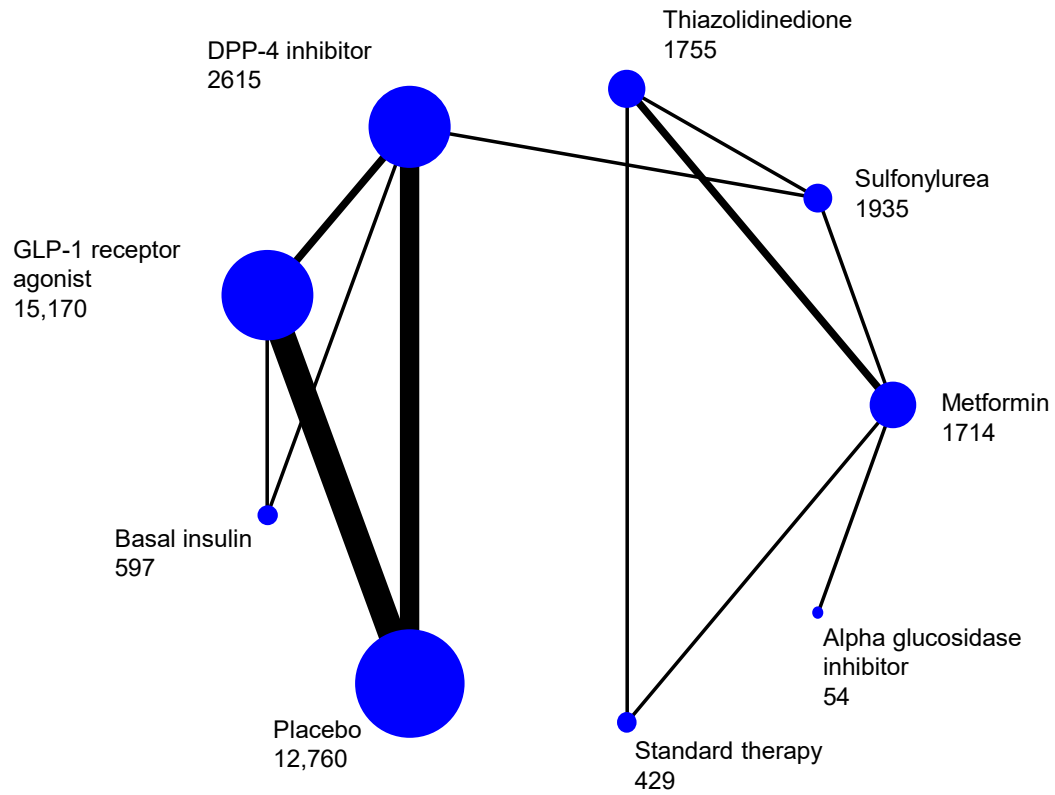

**Figure 18 Network plot for pancreatic cancer**

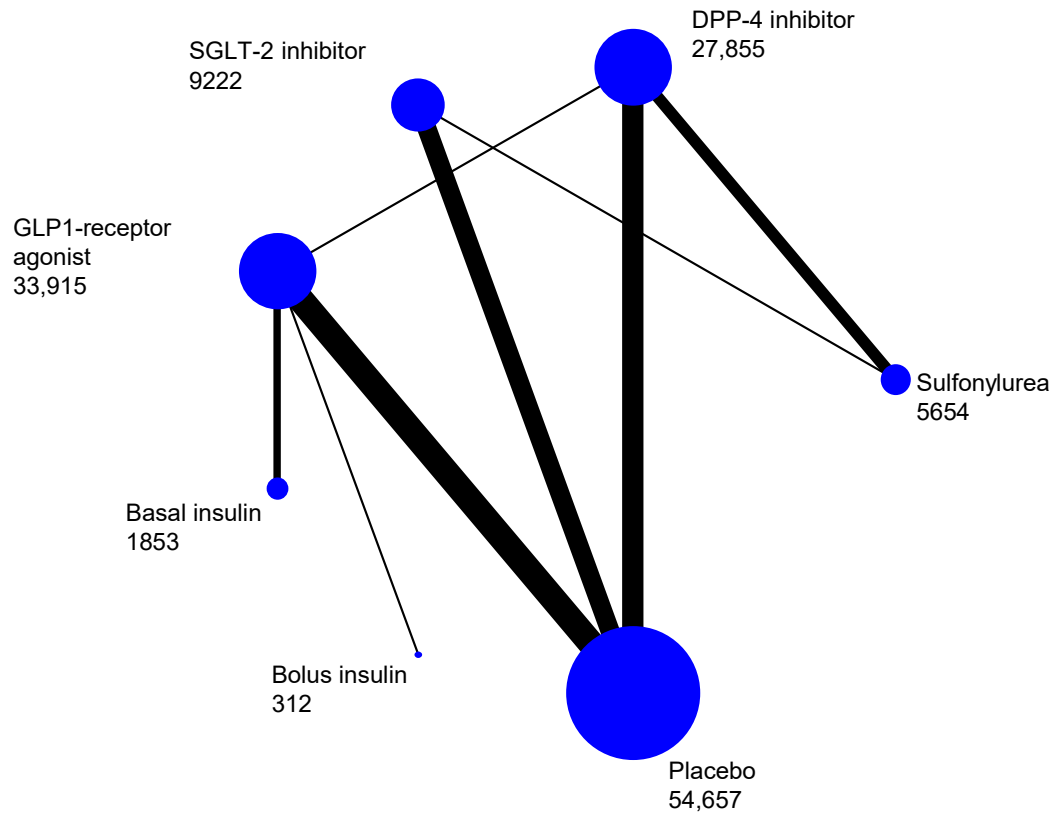

**Figure 19 Network plot for pancreatitis**

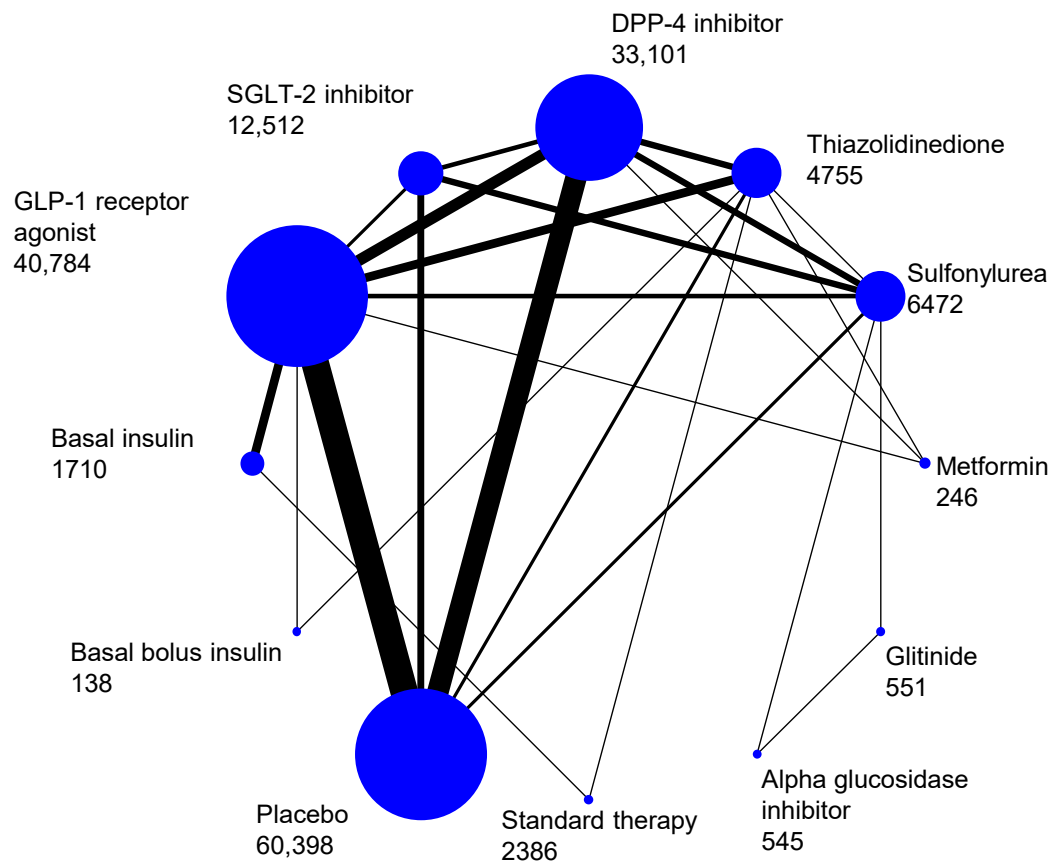



**Figure 20 Network plot for glycated haemoglobin A1C**

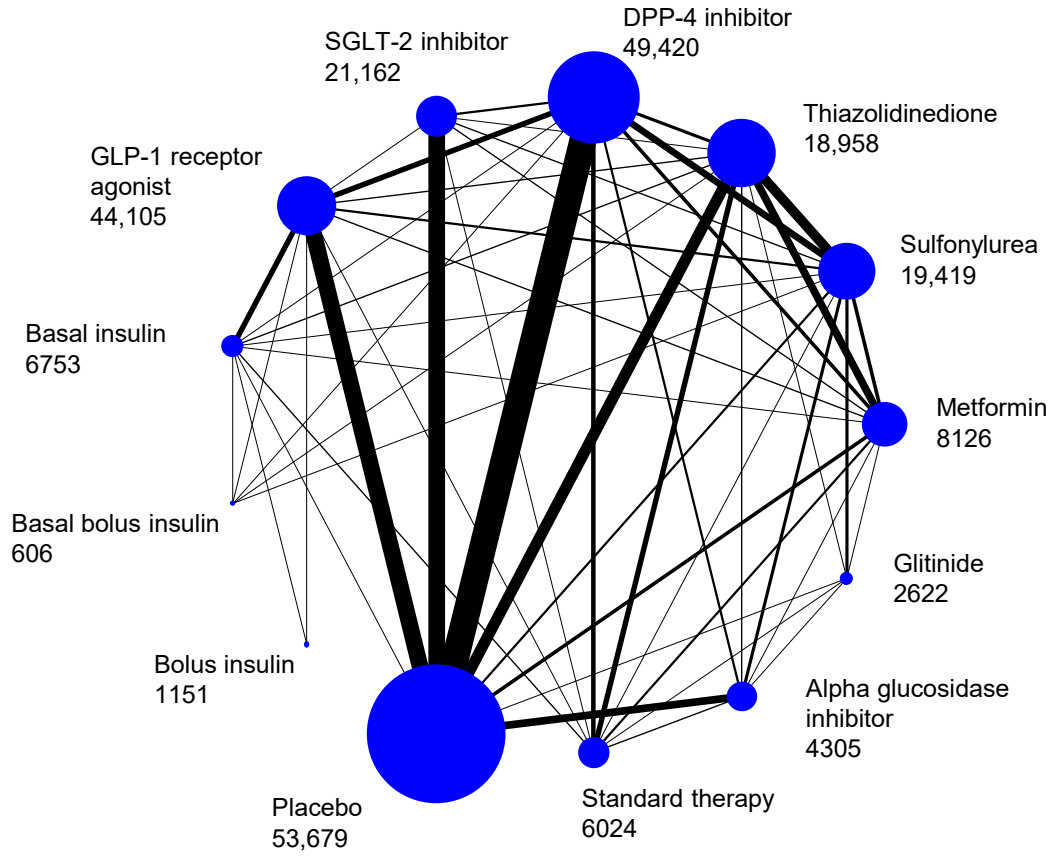

## Appendix 5 Evaluations of network inconsistency and heterogeneity

| Clinical outcome                   | Global consistency |         | Network heterogeneity |
|------------------------------------|--------------------|---------|-----------------------|
|                                    | Chi square         | P value | Tau squared           |
| All-cause mortality                | 21.1               | 0.999   | 0.08                  |
| Cardiovascular mortality           | 13.1               | 0.983   | 0.11                  |
| Nonfatal myocardial infarction     | 22.0               | 0.997   | 0.03                  |
| Nonfatal stroke                    | 15.7               | 0.999   | <0.001                |
| Kidney failure                     | 0.15               | 0.985   | <0.001                |
| Hospitalisation for heart failure  | 10.3               | 0.998   | <0.001                |
| Severe hypoglycaemia               | 24.6               | 0.743   | 0.15                  |
| Blindness                          | 0.00               | 0.999   | Fixed model           |
| Eye disease requiring intervention | ...                | ...     | ...                   |
| Health-related quality of life     | 13.5               | 0.04    | 0.065                 |
| Body weight                        | 82.4               | 0.129   | <0.001                |
| Amputation                         | 0.02               | 0.897   | <0.001                |
| Neuropathic pain*                  | ...                | ...     | Fixed model           |
| Diabetic ketoacidosis              | 1.66               | 0.645   | <0.001                |
| Serious hyperglycaemia             | 14.6               | 0.798   | 0.61                  |
| Genital infection                  | 4.17               | 0.384   | 0.09                  |
| Fournier gangrene*                 | ...                | ...     | <0.001                |
| Severe gastrointestinal events     | 3.00               | 0.558   | 0.69                  |
| Pancreatic cancer                  | 3.05               | 0.549   | <0.001                |
| Pancreatitis                       | 11.1               | 0.973   | 0.07                  |
| HbA1C                              | 86.6               | 0.522   | 0.32                  |

\*No source of inconsistency

## Appendix 6 Direct, indirect and network treatment estimates

**Table 1 All-cause mortality**

| Intervention                |   | Comparator             | Direct estimate      | Indirect estimate   | Incoherence between direct and indirect estimate (p value) | Network estimate    |
|-----------------------------|---|------------------------|----------------------|---------------------|------------------------------------------------------------|---------------------|
| SGLT-2 inhibitor            | v | Placebo                | 0.85<br>(0.79-0.92)  | 1.04<br>(0.55-1.97) | 0.50                                                       | 0.85<br>(0.79-0.92) |
| GLP-1 receptor agonist      | v | Placebo                | 0.88<br>(0.83-0.94)  | 0.81<br>(0.51-1.28) | 0.71                                                       | 0.88<br>(0.83-0.94) |
| SGLT-2 inhibitor            | v | GLP-1 receptor agonist | 0.51<br>(0.09-2.96)  | 0.95<br>(0.86-1.06) | 0.49                                                       | 0.95<br>(0.86-1.06) |
| Metformin                   | v | Placebo                | 1.51<br>(0.64-3.57)  | 0.97<br>(0.68-1.39) | 0.35                                                       | 1.03<br>(0.74-1.44) |
| Sulfonylurea                | v | Placebo                | 1.83<br>(0.34-9.76)  | 1.11<br>(0.96-1.28) | 0.56                                                       | 1.11<br>(0.96-1.29) |
| Thiazolidinedione           | v | Placebo                | 0.94<br>(0.77-1.16)  | 1.19<br>(0.9-1.58)  | 0.19                                                       | 1.02<br>(0.87-1.20) |
| DPP-4 inhibitor             | v | Placebo                | 1.02<br>(0.95-1.09)  | 0.92<br>(0.7-1.21)  | 0.50                                                       | 1.01<br>(0.94-1.08) |
| Alpha glucosidase inhibitor | v | Placebo                | 1.21<br>(0.31-4.68)  | 0.41<br>(0.04-4.39) | 0.47                                                       | 0.89<br>(0.30-2.63) |
| Glitinide                   | v | Placebo                | 1.72<br>(0.15-19.01) | 1.62<br>(0.45-5.86) | 0.97                                                       | 1.64<br>(0.53-5.10) |
| Metformin                   | v | Sulfonylurea           | 0.90<br>(0.58-1.38)  | 0.98<br>(0.59-1.63) | 0.80                                                       | 0.93<br>(0.67-1.29) |
| Metformin                   | v | Thiazolidinedione      | 0.94<br>(0.6-1.46)   | 1.12<br>(0.67-1.87) | 0.60                                                       | 1.01<br>(0.73-1.41) |
| Metformin                   | v | DPP-4 inhibitor        | 0.95<br>(0.28-3.25)  | 1.03<br>(0.73-1.45) | 0.90                                                       | 1.02<br>(0.73-1.43) |
| Metformin                   | v | SGLT-2 inhibitor       | 1.86<br>(0.29-11.83) | 1.24<br>(0.88--1.4) | 0.66                                                       | 1.24<br>(0.88-1.74) |
| Metformin                   | v | GLP-1 receptor agonist | 3.3<br>(0.16-69.1)   | 1.16<br>(0.82-1.63) | 0.50                                                       | 1.17<br>(0.84-1.65) |
| Metformin                   | v | Glitinide              | 3.15<br>(0.14-70.73) | 0.50<br>(0.15-1.73) | 0.27                                                       | 0.63<br>(0.20-2.03) |
| Sulfonylurea                | v | Thiazolidinedione      | 0.97<br>(0.74-1.28)  | 1.2<br>(0.94-1.54)  | 0.26                                                       | 1.09<br>(0.91-1.31) |
| Sulfonylurea                | v | DPP-4 inhibitor        | 1.14<br>(0.98-1.33)  | 0.97<br>(0.73-1.3)  | 0.34                                                       | 1.10<br>(0.96-1.26) |
| Sulfonylurea                | v | SGLT-2 inhibitor       | 1.28<br>(0.54-3.05)  | 1.33<br>(1.13-1.58) | 0.93                                                       | 1.33<br>(1.13-1.57) |
| Sulfonylurea                | v | GLP-1 receptor agonist | 1.07<br>(0.45-2.56)  | 1.27<br>(1.08-1.49) | 0.71                                                       | 1.26<br>(1.08-1.48) |
| Sulfonylurea                | v | Basal bolus insulin    | 0.15<br>(0.01-3.31)  | 2.60<br>(0.51-13.3) | 0.11                                                       | 1.40<br>(0.33-5.91) |

| <b>Intervention</b>         |   | <b>Comparator</b>           | <b>Direct estimate</b> | <b>Indirect estimate</b> | <b>Incoherence between direct and indirect estimate (p value)</b> | <b>Network estimate</b> |
|-----------------------------|---|-----------------------------|------------------------|--------------------------|-------------------------------------------------------------------|-------------------------|
| Sulfonylurea                | v | Alpha glucosidase inhibitor | 1.56<br>(0.31-7.85)    | 1.04<br>(0.24-4.43)      | 0.71                                                              | 1.25<br>(0.42-3.66)     |
| Sulfonylurea                | v | Glitinide                   | 0.54<br>(0.12-2.52)    | 0.90<br>(0.16-5.17)      | 0.67                                                              | 0.68<br>(0.22-2.11)     |
| Thiazolidinedione           | v | DPP-4 inhibitor             | 0.46<br>(0.09-2.23)    | 1.02<br>(0.86-1.21)      | 0.32                                                              | 1.01<br>(0.85-1.20)     |
| Thiazolidinedione           | v | GLP-1 receptor agonist      | 2.20<br>(0.33-14.4)    | 1.15<br>(0.97-1.37)      | 0.50                                                              | 1.16<br>(0.97-1.38)     |
| Thiazolidinedione           | v | Standard therapy            | 0.87<br>(0.69-1.1)     | 0.66<br>(0.28-1.59)      | 0.55                                                              | 0.85<br>(0.68-1.07)     |
| Thiazolidinedione           | v | Glitinide                   | 0.66<br>(0.03-16.38)   | 0.62<br>(0.18-2.09)      | 0.97                                                              | 0.62<br>(0.20-1.95)     |
| DPP-4 inhibitor             | v | SGLT-2 inhibitor            | 0.41<br>(0.12-1.36)    | 1.20<br>(1.08-1.34)      | 0.08                                                              | 1.20<br>(1.08-1.34)     |
| DPP-4 inhibitor             | v | GLP-1 receptor agonist      | 1.15<br>(0.61-2.17)    | 1.15<br>(1.04-1.26)      | 0.99                                                              | 1.15<br>(1.05-1.26)     |
| DPP-4 inhibitor             | v | Basal insulin               | 1.83<br>(0.3-11.29)    | 0.86<br>(0.49-1.49)      | 0.44                                                              | 0.91<br>(0.54-1.55)     |
| DPP-4 inhibitor             | v | Standard therapy            | 1.21<br>(0.29-5.10)    | 0.83<br>(0.63-1.11)      | 0.62                                                              | 0.85<br>(0.64-1.12)     |
| GLP-1 receptor agonist      | v | Basal insulin               | 0.7<br>(0.39-1.29)     | 1.17<br>(0.4-3.38)       | 0.42                                                              | 0.80<br>(0.47-1.34)     |
| GLP-1 receptor agonist      | v | Basal bolus insulin         | 1.33<br>(0.19-9.12)    | 0.88<br>(0.1-7.60)       | 0.78                                                              | 1.11<br>(0.26-4.65)     |
| GLP-1 receptor agonist      | v | Bolus insulin               | 2.98<br>(0.12-73.46)   | 0.26<br>(0.01-6.73)      | 0.30                                                              | 0.90<br>(0.09-8.78)     |
| GLP-1 receptor agonist      | v | Standard therapy            | 0.38<br>(0.09-1.64)    | 0.76<br>(0.57-1.00)      | 0.36                                                              | 0.74<br>(0.56-0.97)     |
| Basal insulin               | v | Basal bolus insulin         | 7.03<br>(0.36-136.8)   | 0.81<br>(0.15-4.50)      | 0.22                                                              | 1.39<br>(0.31-6.15)     |
| Basal insulin               | v | Bolus insulin               | 0.34<br>(0.01-8.36)    | 3.87<br>(0.15-99.6)      | 0.30                                                              | 1.13<br>(0.12-11.0)     |
| Basal insulin               | v | Standard therapy            | 0.61<br>(0.14-2.64)    | 1.00<br>(0.53-1.87)      | 0.54                                                              | 0.93<br>(0.52-1.65)     |
| Alpha glucosidase inhibitor | v | Glitinide                   | 0.24<br>(0.01-5.48)    | 0.69<br>(0.13-3.79)      | 0.57                                                              | 0.55<br>(0.12-2.41)     |

**Table 2 Cardiovascular mortality**

| <b>Intervention</b>         |   | <b>Comparator</b>           | <b>Direct estimate</b> | <b>Indirect estimate</b> | <b>Incoherence (p value)</b> | <b>Network estimate</b> |
|-----------------------------|---|-----------------------------|------------------------|--------------------------|------------------------------|-------------------------|
| SGLT-2 inhibitor            | v | Placebo                     | 0.84<br>(0.76-0.92)    | 1.27<br>(0.45-3.62)      | 0.44                         | 0.84<br>(0.76-0.92)     |
| GLP-1 receptor agonist      | v | Placebo                     | 0.88<br>(0.8-0.96)     | 0.63<br>(0.27-1.48)      | 0.44                         | 0.88<br>(0.80-0.96)     |
| SGLT-2 inhibitor            | v | GLP-1 receptor agonist      | 0.99<br>(0.06-15.9)    | 0.96<br>(0.84-1.09)      | 0.98                         | 0.96<br>(0.84-1.09)     |
| Metformin                   | v | Placebo                     | 3.05<br>(0.48-19.3)    | 0.78<br>(0.37-1.64)      | 0.18                         | 0.95<br>(0.48-1.89)     |
| Sulfonylurea                | v | Placebo                     | 3.47<br>(0.15-78.26)   | 1.00<br>(0.79-1.25)      | 0.43                         | 1.00<br>(0.80-1.26)     |
| Thiazolidinedione           | v | Placebo                     | 0.94<br>(0.73-1.22)    | 1.16<br>(0.66-2.03)      | 0.51                         | 0.97<br>(0.77-1.23)     |
| DPP-4 inhibitor             | v | Placebo                     | 0.98<br>(0.89-1.09)    | 0.99<br>(0.6-1.63)       | 0.98                         | 0.98<br>(0.89-1.09)     |
| Alpha glucosidase inhibitor | v | Placebo                     | 1.54<br>(0.24-9.80)    | 0.17<br>(0.00-13.4)      | 0.39                         | 0.99<br>(0.21-4.70)     |
| Glitinide                   | v | Placebo                     | 0.96<br>(0.02-48.8)    | 0.59<br>(0.08-4.18)      | 0.83                         | 0.65<br>(0.11-3.75)     |
| Metformin                   | v | Sulfonylurea                | 1.30<br>(0.53-3.19)    | 1.25<br>(0.43-3.61)      | 0.5                          | 0.95<br>(0.48-1.87)     |
| Metformin                   | v | Thiazolidinedione           | 0.76<br>(0.12-4.85)    | 1.02<br>(0.47-2.20)      | 0.78                         | 0.97<br>(0.48-1.98)     |
| Metformin                   | v | DPP-4 inhibitor             | 0.34<br>(0.01-8.30)    | 1.01<br>(0.5-2.05)       | 0.51                         | 0.96<br>(0.48-1.92)     |
| Metformin                   | v | SGLT-2 inhibitor            | 1.86<br>(0.29-11.84)   | 1.04<br>(0.49-2.2)       | 0.57                         | 1.13<br>(0.56-2.26)     |
| Metformin                   | v | Glitinide                   | 3.54<br>(0.16-80.0)    | 0.99<br>(0.12-8.35)      | 0.49                         | 1.46<br>(0.24-8.97)     |
| Sulfonylurea                | v | Thiazolidinedione           | 0.85<br>(0.45-1.60)    | 1.09<br>(0.77-1.54)      | 0.5                          | 1.04<br>(0.76-1.42)     |
| Sulfonylurea                | v | DPP-4 inhibitor             | 1.02<br>(0.81-1.29)    | 0.98<br>(0.55-1.75)      | 0.89                         | 1.02<br>(0.82-1.27)     |
| Sulfonylurea                | v | SGLT-2 inhibitor            | 0.84<br>(0.10-6.86)    | 1.20<br>(0.94-1.54)      | 0.74                         | 1.21<br>(0.93-1.57)     |
| Sulfonylurea                | v | Basal bolus insulin         | 0.26<br>(0.01-6.78)    | 0.76<br>(0.03-19.0)      | 0.65                         | 0.45<br>(0.05-4.42)     |
| Sulfonylurea                | v | Alpha glucosidase inhibitor | 1.96<br>(0.2-19.15)    | 0.57<br>(0.07-4.80)      | 0.44                         | 1.01<br>(0.21-4.81)     |
| Sulfonylurea                | v | Glitinide                   | 1.99<br>(0.12-32.0)    | 1.31<br>(0.14-12.5)      | 0.82                         | 1.55<br>(0.27-8.93)     |
| Thiazolidinedione           | v | DPP-4 inhibitor             | 0.18<br>(0.02-1.72)    | 1.01<br>(0.78-1.30)      | 0.14                         | 0.98<br>(0.76-1.27)     |
| Thiazolidinedione           | v | GLP-1 receptor agonist      | 0.97<br>(0.02-49.2)    | 1.11<br>(0.87-1.43)      | 0.95                         | 1.11<br>(0.87-1.43)     |
| Thiazolidinedione           | v | Standard therapy            | 0.87<br>(0.61-1.23)    | 0.49<br>(0.14-1.74)      | 0.40                         | 0.86<br>(0.61-1.21)     |
| Thiazolidinedione           | v | Glitinide                   | 0.66<br>(0.03-16.4)    | 2.13<br>(0.26-17.4)      | 0.55                         | 1.49<br>(0.26-8.64)     |

| <b>Intervention</b>    |   | <b>Comparator</b>      | <b>Direct estimate</b> | <b>Indirect estimate</b> | <b>Incoherence (p value)</b> | <b>Network estimate</b> |
|------------------------|---|------------------------|------------------------|--------------------------|------------------------------|-------------------------|
| DPP-4 inhibitor        | v | SGLT-2 inhibitor       | 0.29<br>(0.05-1.72)    | 1.18<br>(1.03-1.36)      | 0.12                         | 1.19<br>(1.02-1.39)     |
| DPP-4 inhibitor        | v | GLP-1 receptor agonist | 1.55<br>(0.5-4.8)      | 1.12<br>(0.98-1.28)      | 0.57                         | 1.12<br>(0.97-1.29)     |
| DPP-4 inhibitor        | v | Basal insulin          | 0.33<br>(0.01-8.2)     | 0.92<br>(0.42-2.01)      | 0.54                         | 0.87<br>(0.39-1.94)     |
| DPP-4 inhibitor        | v | Standard therapy       | 1.00<br>(0.1-9.67)     | 0.84<br>(0.55-1.27)      | 0.88                         | 0.88<br>(0.57-1.34)     |
| GLP-1 receptor agonist | v | Basal insulin          | 0.71<br>(0.3-1.67)     | 1.03<br>(0.22-4.81)      | 0.67                         | 0.78<br>(0.35-1.72)     |
| GLP-1 receptor agonist | v | Basal bolus insulin    | 0.66<br>(0.03-16.41)   | 0.23<br>(0.01-5.96)      | 0.65                         | 0.39<br>(0.04-3.88)     |
| GLP-1 receptor agonist | v | Bolus insulin          | 2.98<br>(0.12-73.6)    | 0.25<br>(0.01-6.62)      | 0.29                         | 1.13<br>(0.11-11.25)    |
| GLP-1 receptor agonist | v | Standard therapy       | 0.21<br>(0.02-1.85)    | 0.78<br>(0.52-1.18)      | 0.25                         | 0.75<br>(0.50-1.12)     |
| Basal insulin          | v | Bolus insulin          | 0.34<br>(0.01-8.38)    | 4.12<br>(0.15-111)       | 0.29                         | 0.50<br>(0.04-5.68)     |
| Basal insulin          | v | Standard therapy       | 0.69<br>(0.11-4.40)    | 1.05<br>(0.42-2.61)      | 0.69                         | 1.00<br>(0.41-2.43)     |

**Table 3 Nonfatal myocardial infarction**

| <b>Intervention</b>         | <b>Comparator</b>             | <b>Direct estimate</b> | <b>Indirect estimate</b> | <b>Incoherence (p value)</b> | <b>Network estimate</b> |
|-----------------------------|-------------------------------|------------------------|--------------------------|------------------------------|-------------------------|
| SGLT-2 inhibitor            | v Placebo                     | 0.88<br>(0.79-0.97)    | 0.72<br>(0.31-1.69)      | 0.66                         | 0.87<br>(0.79-0.97)     |
| GLP-1 receptor agonist      | v Placebo                     | 0.92<br>(0.85-0.99)    | 1.00<br>(0.56-1.79)      | 0.78                         | 0.92<br>(0.85-0.99)     |
| SGLT-2 inhibitor            | v GLP-1 receptor agonist      | 1.98<br>(0.18-22.0)    | 0.95<br>(0.84-1.08)      | 0.55                         | 0.95<br>(0.84-1.08)     |
| Metformin                   | v Placebo                     | 1.16<br>(0.66-2.04)    | 1.13<br>(0.71-1.81)      | 0.95                         | 1.16<br>(0.81-1.66)     |
| Sulfonylurea                | v Placebo                     | 0.49<br>(0.13-1.82)    | 1.10<br>(0.89-1.37)      | 0.23                         | 1.09<br>(0.88-1.35)     |
| Thiazolidinedione           | v Placebo                     | 1.19<br>(0.45-3.14)    | 1.14<br>(0.82-1.58)      | 0.94                         | 1.19<br>(0.87-1.64)     |
| DPP-4 inhibitor             | v Placebo                     | 1.01<br>(0.92-1.12)    | 1.01<br>(0.68-1.52)      | 1.00                         | 1.01<br>(0.92-1.11)     |
| Alpha glucosidase inhibitor | v Placebo                     | 0.15<br>(0.03-0.86)    | 0.40<br>(0.02-8.25)      | 0.58                         | 0.19<br>(0.04-0.88)     |
| Glitinide                   | v Placebo                     | 1.33<br>(0.06-27.9)    | 0.14<br>(0.02-1.13)      | 0.23                         | 0.29<br>(0.05-1.63)     |
| Metformin                   | v Sulfonylurea                | 1.16<br>(0.68-1.97)    | 0.98<br>(0.59-1.62)      | 0.66                         | 1.06<br>(0.74-1.53)     |
| Metformin                   | v Thiazolidinedione           | 0.79<br>(0.46-1.34)    | 1.30<br>(0.74-2.28)      | 0.21                         | 0.97<br>(0.66-1.44)     |
| Metformin                   | v DPP-4 inhibitor             | 2.04<br>(0.48-8.75)    | 1.08<br>(0.75-1.57)      | 0.41                         | 1.14<br>(0.79-1.64)     |
| Metformin                   | v SGLT-2 inhibitor            | 1.43<br>(0.06-35.5)    | 1.30<br>(0.89-1.9)       | 0.96                         | 1.32<br>(0.91-1.93)     |
| Metformin                   | v GLP-1 receptor agonist      | 0.79<br>(0.07-9.43)    | 1.26<br>(0.86-1.82)      | 0.72                         | 1.26<br>(0.87-1.83)     |
| Metformin                   | v Standard therapy            | 3.06<br>(0.12-76.9)    | 1.17<br>(0.72-1.89)      | 0.56                         | 1.12<br>(0.69-1.82)     |
| Sulfonylurea                | v Thiazolidinedione           | 0.97<br>(0.69-1.35)    | 0.86<br>(0.5-1.49)       | 0.72                         | 0.91<br>(0.69-1.22)     |
| Sulfonylurea                | v DPP-4 inhibitor             | 1.05<br>(0.83-1.31)    | 1.12<br>(0.73-1.71)      | 0.79                         | 1.07<br>(0.88-1.31)     |
| Sulfonylurea                | v SGLT-2 inhibitor            | 1.70<br>(0.48-5.98)    | 1.22<br>(0.96-1.55)      | 0.61                         | 1.25<br>(0.98-1.58)     |
| Sulfonylurea                | v GLP-1 receptor agonist      | 0.94<br>(0.33-2.68)    | 1.19<br>(0.94-1.5)       | 0.67                         | 1.19<br>(0.94-1.49)     |
| Sulfonylurea                | v Alpha glucosidase inhibitor | 2.50<br>(0.13-47.0)    | 7.20<br>(1.30-40.0)      | 0.53                         | 5.63<br>(1.23-25.7)     |
| Sulfonylurea                | v Glitinide                   | 6.07<br>(0.76-48.3)    | 1.49<br>(0.09-24.7)      | 0.41                         | 3.77<br>(0.67-21.3)     |
| Thiazolidinedione           | v DPP-4 inhibitor             | 1.17<br>(0.31-4.43)    | 1.13<br>(0.82-1.55)      | 0.96                         | 1.17<br>(0.86-1.61)     |
| Thiazolidinedione           | v GLP-1 receptor agonist      | 3.10<br>(0.54-17.9)    | 1.21<br>(0.87-1.67)      | 0.30                         | 1.30<br>(0.94-1.80)     |

| <b>Intervention</b>         | <b>Comparator</b>        | <b>Direct estimate</b> | <b>Indirect estimate</b> | <b>Incoherence (p value)</b> | <b>Network estimate</b> |
|-----------------------------|--------------------------|------------------------|--------------------------|------------------------------|-------------------------|
| Thiazolidinedione           | v Basal insulin          | 3.05<br>(0.12-76.6)    | 0.99<br>(0.45-2.15)      | 0.5                          | 1.18<br>(0.57-2.45)     |
| Thiazolidinedione           | v Standard therapy       | 1.17<br>(0.84-1.65)    | 1.36<br>(0.62-2.99)      | 0.74                         | 1.15<br>(0.84-1.58)     |
| DPP-4 inhibitor             | v SGLT-2 inhibitor       | 1.51<br>(0.47-4.87)    | 1.16<br>(1.01-1.33)      | 0.66                         | 1.16<br>(1.01-1.33)     |
| DPP-4 inhibitor             | v GLP-1 receptor agonist | 1.06<br>(0.47-2.36)    | 1.11<br>(0.98-1.25)      | 0.91                         | 1.11<br>(0.98-1.25)     |
| DPP-4 inhibitor             | v Basal insulin          | 2.70<br>(0.11-66.7)    | 0.88<br>(0.42-1.83)      | 0.5                          | 1.00<br>(0.50-2.00)     |
| DPP-4 inhibitor             | v Standard therapy       | 0.65<br>(0.23-1.86)    | 1.15<br>(0.75-1.77)      | 0.32                         | 0.98<br>(0.65-1.49)     |
| GLP-1 receptor agonist      | v Basal insulin          | 0.83<br>(0.35-1.95)    | 0.88<br>(0.25-3.03)      | 0.94                         | 0.91<br>(0.46-1.80)     |
| GLP-1 receptor agonist      | v Basal bolus insulin    | 2.84<br>(0.12-70.1)    | 2.45<br>(0.09-65.5)      | 0.95                         | 2.75<br>(0.28-27.2)     |
| GLP-1 receptor agonist      | v Bolus insulin          | 0.88<br>(0.18-4.2)     | 0.62<br>(0.11-3.33)      | 0.77                         | 0.78<br>(0.25-2.43)     |
| GLP-1 receptor agonist      | v Standard therapy       | 1.42<br>(0.45-4.46)    | 0.91<br>(0.59-1.4)       | 0.48                         | 0.89<br>(0.58-1.36)     |
| Basal insulin               | v Basal bolus insulin    | 2.92<br>(0.12-72.2)    | 3.39<br>(0.13-90.6)      | 0.95                         | 3.03<br>(0.31-29.9)     |
| Basal insulin               | v Bolus insulin          | 0.76<br>(0.17-3.45)    | 1.08<br>(0.19-6.14)      | 0.77                         | 0.86<br>(0.27-2.66)     |
| Basal insulin               | v Standard therapy       | 3.94<br>(0.43-35.8)    | 0.95<br>(0.41-2.22)      | 0.24                         | 0.98<br>(0.46-2.10)     |
| Alpha glucosidase inhibitor | v Glitinide              | 0.99<br>(0.02-50.0)    | 0.56<br>(0.04-8.58)      | 0.82                         | 0.67<br>(0.07-6.31)     |



**Table 4 Nonfatal stroke**

| <b>Intervention</b>    | <b>Comparator</b>        | <b>Direct estimate</b> | <b>Indirect estimate</b> | <b>Incoherence (p value)</b> | <b>Network estimate</b> |
|------------------------|--------------------------|------------------------|--------------------------|------------------------------|-------------------------|
| SGLT-2 inhibitor       | v Placebo                | 1.01<br>(0.89-1.14)    | 1.15<br>(0.54-2.47)      | 0.73                         | 1.01<br>(0.89-1.14)     |
| GLP-1 receptor agonist | v Placebo                | 0.83<br>(0.75-0.92)    | 1.20<br>(0.6-2.37)       | 0.31                         | 0.84<br>(0.76-0.93)     |
| SGLT-2 inhibitor       | v GLP-1 receptor agonist | 0.40<br>(0.09-1.82)    | 1.22<br>(1.04-1.43)      | 0.15                         | 1.20<br>(1.03-1.41)     |
| Metformin              | v Placebo                | 0.95<br>(0.38-2.39)    | 1.02<br>(0.63-1.65)      | 0.90                         | 1.01<br>(0.66-1.54)     |
| Sulfonylurea           | v Placebo                | 0.63<br>(0.12-3.37)    | 1.11<br>(0.87-1.42)      | 0.51                         | 1.09<br>(0.86-1.40)     |
| Thiazolidinedione      | v Placebo                | 0.90<br>(0.59-1.37)    | 0.97<br>(0.65-1.45)      | 0.78                         | 0.94<br>(0.70-1.25)     |
| DPP-4 inhibitor        | v Placebo                | 0.94<br>(0.83-1.08)    | 0.75<br>(0.49-1.15)      | 0.32                         | 0.93<br>(0.82-1.05)     |
| Metformin              | v Sulfonylurea           | 0.88<br>(0.52-1.48)    | 0.99<br>(0.50-1.96)      | 0.79                         | 0.92<br>(0.61-1.38)     |
| Metformin              | v Thiazolidinedione      | 1.29<br>(0.68-2.44)    | 0.90<br>(0.49-1.67)      | 0.43                         | 1.07<br>(0.69-1.66)     |
| Metformin              | v DPP-4 inhibitor        | 1.21<br>(0.27-5.31)    | 1.08<br>(0.69-1.67)      | 0.88                         | 1.09<br>(0.71-1.66)     |
| Metformin              | v SGLT-2 inhibitor       | 0.67<br>(0.03-16.4)    | 1.00<br>(0.64-1.56)      | 0.80                         | 0.99<br>(0.64-1.55)     |
| Metformin              | v GLP-1 receptor agonist | 1.53<br>(0.17-13.9)    | 1.18<br>(0.76-1.84)      | 0.82                         | 1.20<br>(0.77-1.85)     |
| Sulfonylurea           | v Thiazolidinedione      | 1.10<br>(0.74-1.63)    | 1.26<br>(0.81-1.96)      | 0.66                         | 1.17<br>(0.87-1.57)     |
| Sulfonylurea           | v DPP-4 inhibitor        | 1.26<br>(0.97-1.63)    | 1.00<br>(0.64-1.55)      | 0.38                         | 1.18<br>(0.94-1.48)     |
| Sulfonylurea           | v SGLT-2 inhibitor       | 0.43<br>(0.13-1.4)     | 1.14<br>(0.86-1.5)       | 0.12                         | 1.08<br>(0.83-1.42)     |
| Sulfonylurea           | v GLP-1 receptor agonist | 1.19<br>(0.3-4.8)      | 1.31<br>(1.00-1.70)      | 0.90                         | 1.30<br>(1.01-1.69)     |
| Sulfonylurea           | v Standard therapy       | 3.04<br>(0.14-68.4)    | 0.9<br>(0.58-1.4)        | 0.45                         | 0.92<br>(0.59-1.43)     |
| Thiazolidinedione      | v DPP-4 inhibitor        | 1.43<br>(0.41-4.99)    | 0.99<br>(0.73-1.34)      | 0.58                         | 1.01<br>(0.76-1.36)     |
| Thiazolidinedione      | v GLP-1 receptor agonist | 1.51<br>(0.25-9.22)    | 1.11<br>(0.81-1.51)      | 0.74                         | 1.12<br>(0.82-1.51)     |
| Thiazolidinedione      | v Basal insulin          | 3.15<br>(0.12-82.2)    | 1.04<br>(0.45-2.42)      | 0.52                         | 1.12<br>(0.49-2.52)     |
| Thiazolidinedione      | v Basal-bolus insulin    | 1.01<br>(0.06-16.4)    | 1.97<br>(0.2-19.05)      | 0.72                         | 1.51<br>(0.26-8.77)     |
| Thiazolidinedione      | v Standard therapy       | 0.77<br>(0.54-1.11)    | 0.93<br>(0.32-2.68)      | 0.76                         | 0.79<br>(0.56-1.11)     |
| DPP-4 inhibitor        | v SGLT-2 inhibitor       | 0.92<br>(0.28-3.01)    | 0.92<br>(0.77-1.09)      | 0.99                         | 0.92<br>(0.77-1.09)     |
| DPP-4 inhibitor        | v GLP-1 receptor agonist | 1.03<br>(0.37-2.88)    | 1.1<br>(0.94-1.3)        | 0.89                         | 1.10<br>(0.94-1.29)     |

| <b>Intervention</b>    |   | <b>Comparator</b>   | <b>Direct estimate</b> | <b>Indirect estimate</b> | <b>Incoherence (p value)</b> | <b>Network estimate</b> |
|------------------------|---|---------------------|------------------------|--------------------------|------------------------------|-------------------------|
| DPP-4 inhibitor        | v | Basal insulin       | 0.30<br>(0.01-7.35)    | 1.20<br>(0.53-2.69)      | 0.41                         | 1.10<br>(0.50-2.42)     |
| DPP-4 inhibitor        | v | Standard therapy    | 0.90<br>(0.21-3.92)    | 0.77<br>(0.49-1.21)      | 0.84                         | 0.78<br>(0.51-1.20)     |
| GLP-1 receptor agonist | v | Basal insulin       | 1.20<br>(0.5-2.87)     | 0.53<br>(0.1-2.76)       | 0.39                         | 1.00<br>(0.46-2.17)     |
| GLP-1 receptor agonist | v | Basal bolus insulin | 0.97<br>(0.06-15.7)    | 1.68<br>(0.18-15.9)      | 0.76                         | 1.35<br>(0.24-7.78)     |
| GLP-1 receptor agonist | v | Standard therapy    | 0.70<br>(0.11-4.32)    | 0.71<br>(0.45-1.11)      | 0.99                         | 0.71<br>(0.46-1.10)     |
| Basal insulin          | v | Basal bolus insulin | 1.95<br>(0.18-21.6)    | 0.90<br>(0.07-11.4)      | 0.67                         | 1.35<br>(0.24-7.77)     |
| Basal insulin          | v | Standard therapy    | 3.00<br>(0.12-74.0)    | 0.63<br>(0.26-1.55)      | 0.36                         | 0.71<br>(0.30-1.68)     |
| Glitinide              | v | Standard therapy    | 2.92<br>(0.11-74.1)    | 0.28<br>(0.03-3.04)      | 0.25                         | 1.56<br>(0.23-10.6)     |

**Table 5 Kidney failure**

| <b>Intervention</b>    |   | <b>Comparator</b>      | <b>Direct estimate</b> | <b>Indirect estimate</b> | <b>Incoherence (p value)</b> | <b>Network estimate</b> |
|------------------------|---|------------------------|------------------------|--------------------------|------------------------------|-------------------------|
| SGLT-2 inhibitor       | v | Placebo                | 0.71<br>(0.57-0.89)    | 0.85<br>(0.11-6.48)      | 0.87                         | 0.71<br>(0.57-0.89)     |
| GLP-1 receptor agonist | v | Placebo                | 0.79<br>(0.67-0.93)    | 0.64<br>(0.2-2.11)       | 0.74                         | 0.78<br>(0.67-0.92)     |
| SGLT-2 inhibitor       | v | GLP-1 receptor agonist | 0.99<br>(0.06-15.9)    | 0.91<br>(0.69-1.20)      | 0.95                         | 0.91<br>(0.69-1.20)     |
| DPP-4 inhibitor        | v | Placebo                | 0.95<br>(0.72-1.26)    | 1.11<br>(0.34-3.63)      | 0.81                         | 0.96<br>(0.73-1.26)     |
| Sulfonylurea           | v | DPP-4 inhibitor        | 0.96<br>(0.14-6.57)    | 0.73<br>(0.07-7.23)      | 0.86                         | 0.86<br>(0.20-3.74)     |
| Sulfonylurea           | v | SGLT-2 inhibitor       | 0.99<br>(0.1-9.51)     | 1.30<br>(0.18-9.18)      | 0.86                         | 1.15<br>(0.26-5.08)     |
| DPP-4 inhibitor        | v | GLP-1 receptor agonist | 1.52<br>(0.42-5.49)    | 1.21<br>(0.88-1.67)      | 0.73                         | 1.23<br>(0.90-1.68)     |

**Table 6 Hospitalisation for heart failure**

| <b>Intervention</b>    | <b>Comparator</b>        | <b>Direct estimate</b> | <b>Indirect estimate</b> | <b>Incoherence (p value)</b> | <b>Network estimate</b> |
|------------------------|--------------------------|------------------------|--------------------------|------------------------------|-------------------------|
| SGLT-2 inhibitor       | v Placebo                | 0.70<br>(0.63-0.77)    | 0.91<br>(0.34-2.47)      | 0.6                          | 0.70<br>(0.63-0.77)     |
| GLP-1 receptor agonist | v Placebo                | 0.95<br>(0.86-1.04)    | 0.62<br>(0.33-1.15)      | 0.18                         | 0.94<br>(0.85-1.03)     |
| SGLT-2 inhibitor       | v GLP-1 receptor agonist | 2.00<br>(0.18-22.2)    | 0.74<br>(0.65-0.85)      | 0.42                         | 0.74<br>(0.65-0.85)     |
| Metformin              | v Placebo                | 0.74<br>(0.16-3.35)    | 1.26<br>(0.77-2.05)      | 0.51                         | 1.19<br>(0.75-1.90)     |
| Sulfonylurea           | v Placebo                | 0.68<br>(0.07-7.00)    | 0.89<br>(0.71-1.12)      | 0.82                         | 0.89<br>(0.71-1.11)     |
| Thiazolidinedione      | v Placebo                | 1.53<br>(1.26-1.85)    | 1.67<br>(1.13-2.46)      | 0.68                         | 1.55<br>(1.31-1.84)     |
| DPP-4 inhibitor        | v Placebo                | 1.05<br>(0.94-1.18)    | 1.05<br>(0.71-1.54)      | 0.98                         | 1.05<br>(0.95-1.17)     |
| Basal insulin          | v Placebo                | 0.33<br>(0.01-8.05)    | 0.84<br>(0.38-1.86)      | 0.57                         | 0.79<br>(0.37-1.72)     |
| Metformin              | v Sulfonylurea           | 1.43<br>(0.79-2.61)    | 1.18<br>(0.51-2.77)      | 0.73                         | 1.34<br>(0.84-2.13)     |
| Metformin              | v Thiazolidinedione      | 0.81<br>(0.44-1.48)    | 0.72<br>(0.36-1.44)      | 0.80                         | 0.77<br>(0.49-1.22)     |
| Metformin              | v DPP-4 inhibitor        | 0.66<br>(0.01-33.6)    | 1.14<br>(0.71-1.83)      | 0.79                         | 1.13<br>(0.71-1.81)     |
| Metformin              | v SGLT-2 inhibitor       | 1.43<br>(0.06-35.5)    | 1.72<br>(1.06-2.78)      | 0.91                         | 1.71<br>(1.06-2.75)     |
| Metformin              | v GLP-1 receptor agonist | 2.77<br>(0.36-21.5)    | 1.22<br>(0.75-1.98)      | 0.45                         | 1.27<br>(0.79-2.05)     |
| Sulfonylurea           | v Thiazolidinedione      | 0.57<br>(0.4-0.79)     | 0.58<br>(0.42-0.81)      | 0.92                         | 0.57<br>(0.45-0.73)     |
| Sulfonylurea           | v DPP-4 inhibitor        | 0.86<br>(0.65-1.12)    | 0.83<br>(0.57-1.20)      | 0.90                         | 0.85<br>(0.68-1.05)     |
| Sulfonylurea           | v SGLT-2 inhibitor       | 1.18<br>(0.32-4.43)    | 1.28<br>(1.00-1.64)      | 0.91                         | 1.28<br>(1.00-1.63)     |
| Sulfonylurea           | v GLP-1 receptor agonist | 0.59<br>(0.13-2.61)    | 0.96<br>(0.75-1.23)      | 0.52                         | 0.95<br>(0.75-1.21)     |
| Thiazolidinedione      | v DPP-4 inhibitor        | 4.12<br>(0.20-86.7)    | 1.47<br>(1.21-1.78)      | 0.51                         | 1.47<br>(1.21-1.79)     |
| Thiazolidinedione      | v GLP-1 receptor agonist | 7.33<br>(0.85-63.1)    | 1.64<br>(1.35-1.99)      | 0.17                         | 1.66<br>(1.36-2.01)     |
| Thiazolidinedione      | v Basal insulin          | 2.9<br>(0.12-72.0)     | 1.9<br>(0.86-4.24)       | 0.80                         | 1.95<br>(0.90-4.24)     |
| Thiazolidinedione      | v Standard therapy       | 1.93<br>(1.26-2.96)    | 1.32<br>(0.45-3.85)      | 0.51                         | 1.83<br>(1.23-2.73)     |
| DPP-4 inhibitor        | v SGLT-2 inhibitor       | 0.40<br>(0.02-9.88)    | 1.51<br>(1.31-1.75)      | 0.42                         | 1.51<br>(1.31-1.74)     |
| DPP-4 inhibitor        | v GLP-1 receptor agonist | 1.19<br>(0.54-2.65)    | 1.12<br>(0.97-1.3)       | 0.88                         | 1.12<br>(0.98-1.29)     |
| DPP-4 inhibitor        | v Standard therapy       | 1.98<br>(0.18-21.9)    | 1.23<br>(0.79-1.91)      | 0.7                          | 1.25<br>(0.81-1.92)     |

|                        |   |                  |                     |                     |      |                     |
|------------------------|---|------------------|---------------------|---------------------|------|---------------------|
| SGLT-2 inhibitor       | v | Standard therapy | 0.33<br>(0.01-8.09) | 0.84<br>(0.54-1.3)  | 0.57 | 0.83<br>(0.53-1.28) |
| GLP-1 receptor agonist | v | Basal insulin    | 0.96<br>(0.32-2.89) | 1.44<br>(0.48-4.27) | 0.61 | 1.18<br>(0.54-2.55) |
| GLP-1 receptor agonist | v | Standard therapy | 0.32<br>(0.03-3.17) | 1.16<br>(0.75-1.8)  | 0.28 | 1.11<br>(0.72-1.71) |
| Basal insulin          | v | Standard therapy | 0.89<br>(0.28-2.8)  | 0.99<br>(0.33-2.92) | 0.90 | 0.94<br>(0.43-2.07) |

**Table 7 Severe hypoglycaemia**

| <b>Intervention</b>         | <b>Comparator</b>             | <b>Direct estimate</b> | <b>Indirect estimate</b> | <b>Incoherence (p value)</b> | <b>Network estimate</b> |
|-----------------------------|-------------------------------|------------------------|--------------------------|------------------------------|-------------------------|
| SGLT-2 inhibitor            | v Placebo                     | 0.87<br>(0.65-1.17)    | 1.01<br>(0.60-1.68)      | 0.64                         | 0.90<br>(0.70-1.16)     |
| GLP-1 receptor agonist      | v Placebo                     | 0.96<br>(0.81-1.14)    | 0.77<br>(0.54-1.09)      | 0.26                         | 0.94<br>(0.63-1.41)     |
| SGLT-2 inhibitor            | v GLP-1 receptor agonist      | 0.92<br>(0.42-2.03)    | 0.99<br>(0.72-1.35)      | 0.86                         | 0.98<br>(0.73-1.31)     |
| Metformin                   | v Placebo                     | 1.70<br>(0.63-4.59)    | 1.58<br>(0.59-4.26)      | 0.92                         | 1.64<br>(0.81-3.30)     |
| Sulfonylurea                | v Placebo                     | 0.93<br>(0.11-7.7)     | 6.64<br>(4.39-10.1)      | 0.07                         | 6.18<br>(4.11-9.29)     |
| Thiazolidinedione           | v Placebo                     | 1.52<br>(0.83-2.78)    | 1.2<br>(0.67-2.17)       | 0.59                         | 1.35<br>(0.89-2.05)     |
| DPP-4 inhibitor             | v Placebo                     | 1.06<br>(0.89-1.27)    | 1.2<br>(0.84-1.72)       | 0.54                         | 1.09<br>(0.93-1.27)     |
| Basal insulin               | v Placebo                     | 0.49<br>(0.01-25.3)    | 2.34<br>(1.63-3.35)      | 0.44                         | 2.31<br>(1.62-3.30)     |
| Alpha glucosidase inhibitor | v Placebo                     | 0.72<br>(0.11-4.68)    | 3.99<br>(0.17-93.3)      | 0.36                         | 1.12<br>(0.22-5.63)     |
| Metformin                   | v Sulfonylurea                | 0.12<br>(0.02-0.84)    | 0.3<br>(0.13-0.69)       | 0.38                         | 0.27<br>(0.12-0.57)     |
| Metformin                   | v Thiazolidinedione           | 1<br>(0.06-16.4)       | 1.24<br>(0.53-2.88)      | 0.89                         | 1.21<br>(0.54-2.73)     |
| Metformin                   | v DPP-4 inhibitor             | 0.98<br>(0.11-8.55)    | 1.59<br>(0.75-3.37)      | 0.68                         | 1.51<br>(0.74-3.07)     |
| Metformin                   | v SGLT-2 inhibitor            | 3.67<br>(0.84-16.0)    | 1.45<br>(0.63-3.33)      | 0.28                         | 1.82<br>(0.88-3.74)     |
| Metformin                   | v Glitinide                   | 0.43<br>(0.11-1.6)     | 0.96<br>(0.09-9.9)       | 0.55                         | 0.52<br>(0.16-1.64)     |
| Sulfonylurea                | v Thiazolidinedione           | 7.48<br>(2.6-21.5)     | 3.87<br>(2.09-7.17)      | 0.29                         | 4.58<br>(2.68-7.81)     |
| Sulfonylurea                | v DPP-4 inhibitor             | 5.60<br>(3.44-9.13)    | 5.82<br>(2.96-11.5)      | 0.93                         | 5.68<br>(3.82-8.44)     |
| Sulfonylurea                | v SGLT-2 inhibitor            | 6.01<br>(2.29-15.8)    | 7.09<br>(4.23-11.9)      | 0.77                         | 6.84<br>(4.34-10.8)     |
| Sulfonylurea                | v GLP-1 receptor agonist      | 1.25<br>(0.11-14.5)    | 7.03<br>(4.57-10.8)      | 0.17                         | 6.70<br>(4.38-10.3)     |
| Sulfonylurea                | v Alpha glucosidase inhibitor | 1.68<br>(0.07-39.0)    | 8.11<br>(1.26-52.2)      | 0.39                         | 5.50<br>(1.07-28.4)     |
| Sulfonylurea                | v Glitinide                   | 2.47<br>(0.27-22.2)    | 1.76<br>(0.38-8.05)      | 0.80                         | 1.96<br>(0.55-6.95)     |
| Thiazolidinedione           | v DPP-4 inhibitor             | 0.37<br>(0.08-1.69)    | 1.38<br>(0.88-2.15)      | 0.10                         | 1.24<br>(0.81-1.90)     |
| Thiazolidinedione           | v GLP-1 receptor agonist      | 0.83<br>(0.23-3.08)    | 1.56<br>(1-2.44)         | 0.37                         | 1.46<br>(0.96-2.23)     |
| Thiazolidinedione           | v Basal insulin               | 0.81<br>(0.24-2.72)    | 0.54<br>(0.31-0.95)      | 0.55                         | 0.58<br>(0.35-0.97)     |

|                             |   |                        |                     |                     |      |                     |
|-----------------------------|---|------------------------|---------------------|---------------------|------|---------------------|
| Thiazolidinedione           | v | Standard therapy       | 2.48<br>(1.01-6.09) | 1.05<br>(0.57-1.92) | 0.12 | 1.38<br>(0.83-2.30) |
| DPP-4 inhibitor             | v | SGLT-2 inhibitor       | 0.65<br>(0.25-1.66) | 1.29<br>(0.95-1.74) | 0.17 | 1.21<br>(0.90-1.61) |
| DPP-4 inhibitor             | v | GLP-1 receptor agonist | 1.43<br>(0.93-2.2)  | 1.11<br>(0.88-1.41) | 0.31 | 1.18<br>(0.97-1.44) |
| DPP-4 inhibitor             | v | Basal insulin          | 0.24<br>(0.03-2.19) | 0.48<br>(0.33-0.71) | 0.54 | 0.47<br>(0.32-0.69) |
| DPP-4 inhibitor             | v | Standard therapy       | 1.36<br>(0.35-5.23) | 1.09<br>(0.7-1.71)  | 0.76 | 1.11<br>(0.72-1.71) |
| GLP-1 receptor agonist      | v | Basal insulin          | 0.4<br>(0.29-0.57)  | 0.36<br>(0.13-0.97) | 0.83 | 0.40<br>(0.29-0.55) |
| Basal insulin               | v | Standard therapy       | 4.03<br>(0.44-37.3) | 2.3<br>(1.37-3.86)  | 0.63 | 2.36<br>(1.42-3.94) |
| Alpha glucosidase inhibitor | v | Glitinide              | 1.01<br>(0.02-51.9) | 0.25<br>(0.03-2.48) | 0.55 | 0.36<br>(0.05-2.58) |

**Table 8 Health-related quality of life**

| <b>Intervention</b>    | <b>Comparator</b>        | <b>Direct estimate</b> | <b>Indirect estimate</b> | <b>Incoherence (p value)</b> | <b>Network estimate</b> |
|------------------------|--------------------------|------------------------|--------------------------|------------------------------|-------------------------|
| GLP-1 receptor agonist | v Placebo                | 0.13<br>(0.03-0.22)    | 0.71<br>(0.09-1.32)      | 0.06                         | 0.13<br>(0.0-0.23)      |
| DPP-4 inhibitor        | v Placebo                | 0.26<br>(-0.11-0.63)   | -0.04<br>(-0.21-0.14)    | 0.26                         | 0.02<br>(-0.14-0.19)    |
| Metformin              | v Thiazolidinedione      | -0.16<br>(-0.47-0.15)  | -0.30<br>(-1.69-1.09)    | 0.86                         | -0.16<br>(-0.46-0.14)   |
| Metformin              | v DPP-4 inhibitor        | -0.02<br>(-0.31-0.27)  | 0.01<br>(-0.63-0.65)     | 0.92                         | -0.02<br>(-0.26-0.23)   |
| Metformin              | v GLP-1 receptor agonist | -0.11<br>(-0.42-0.19)  | -0.16<br>(-0.66-0.34)    | 0.87                         | -0.12<br>(-0.37-0.12)   |
| Thiazolidinedione      | v DPP-4 inhibitor        | 0.15<br>(-0.21-0.50)   | 0.14<br>(-0.50-0.78)     | 0.99                         | 0.15<br>(-0.14-0.43)    |
| Thiazolidinedione      | v GLP-1 receptor agonist | 0.05<br>(-0.28-0.37)   | 0.01<br>(-0.64-0.66)     | 0.92                         | 0.04<br>(-0.24-0.32)    |
| DPP-4 inhibitor        | v GLP-1 receptor agonist | -0.14<br>(-0.291-0.02) | 0.05<br>(-0.30-0.40)     | 0.34                         | -0.11<br>(-0.25-0.03)   |
| DPP-4 inhibitor        | v Standard therapy       | 0.41<br>(0.12-0.71)    | 0.25<br>(-0.10-0.591)    | 0.46                         | 0.34<br>(0.13-0.56)     |
| GLP-1 receptor agonist | v Basal insulin          | 0.20<br>(-0.11-0.52)   | -0.31<br>(-0.64-0.02)    | 0.03                         | -0.03<br>(-0.29-0.23)   |
| GLP-1 receptor agonist | v Bolus insulin          | 0.24<br>(0.04-0.44)    | 0.75<br>(0.34-1.16)      | 0.03                         | 0.34<br>(0.13-0.55)     |
| Basal insulin          | v Bolus insulin          | 0.55<br>(0.28-0.81)    | 0.04<br>(-0.33-0.41)     | 0.03                         | 0.37<br>(0.13-0.62)     |



**Table 9 Body weight**

| <b>Intervention</b>         | <b>Comparator</b>             | <b>Direct estimate</b> | <b>Indirect estimate</b> | <b>Incoherence (p value)</b> | <b>Network estimate</b> |
|-----------------------------|-------------------------------|------------------------|--------------------------|------------------------------|-------------------------|
| SGLT-2 inhibitor            | v Placebo                     | -1.89<br>(-2.26--1.53) | -1.98<br>(-2.52--1.44)   | 0.80                         | -1.92<br>(-2.23--1.62)  |
| GLP-1 receptor agonist      | v Placebo                     | -1.50<br>(-1.83--1.17) | -1.36<br>(-1.81--0.90)   | 0.62                         | -1.45<br>(-1.72--1.18)  |
| SGLT-2 inhibitor            | v GLP-1 receptor agonist      | 0.06<br>(-1.21-1.34)   | -0.52<br>(-0.92--0.13)   | 0.39                         | -0.47<br>(-0.85--0.09)  |
| Metformin                   | v Placebo                     | -0.88<br>(-1.94-0.19)  | -0.72<br>(-1.19--0.25)   | 0.8                          | -0.75<br>(-1.18--0.32)  |
| Sulfonylurea                | v Placebo                     | 2.85<br>(1.59-4.10)    | 1.60<br>(1.21-1.99)      | 0.06                         | 1.71<br>(1.33-2.08)     |
| Thiazolidinedione           | v Placebo                     | 2.92<br>(2.39-3.45)    | 2.37<br>(1.93-2.82)      | 0.12                         | 2.60<br>(2.26-2.94)     |
| DPP-4 inhibitor             | v Placebo                     | 0.23<br>(-0.08-0.55)   | 0.48<br>(0.09-0.87)      | 0.34                         | 0.33<br>(0.08-0.57)     |
| Basal insulin               | v Placebo                     | 2.67<br>(0.79-4.56)    | 1.95<br>(1.42-2.48)      | 0.47                         | 2.00<br>(1.50-2.51)     |
| Alpha glucosidase inhibitor | v Placebo                     | -0.38<br>(-1.14-0.38)  | -0.24<br>(-1.01-0.54)    | 0.80                         | -0.31<br>(-0.85-0.23)   |
| Glitinide                   | v Placebo                     | 1.11<br>(-0.79-3.02)   | 1.07<br>(0.12-2.02)      | 0.97                         | 1.08<br>(0.23-1.93)     |
| Metformin                   | v Sulfonylurea                | -1.52<br>(-2.61--0.44) | -2.69<br>(-3.24--2.15)   | 0.06                         | -2.46<br>(-2.95--1.97)  |
| Metformin                   | v Thiazolidinedione           | -3.79<br>(-4.63--2.95) | -3.15<br>(-3.72--2.59)   | 0.22                         | -3.35<br>(-3.82--2.88)  |
| Metformin                   | v DPP-4 inhibitor             | -1.29<br>(-2.04--0.54) | -0.97<br>(-1.5--0.44)    | 0.50                         | -1.08<br>(-1.51--0.64)  |
| Metformin                   | v SGLT-2 inhibitor            | 1.72<br>(0.55-2.89)    | 1.06<br>(0.53-1.59)      | 0.32                         | 1.17<br>(0.69-1.66)     |
| Metformin                   | v GLP-1 receptor agonist      | -0.27<br>(-1.55-1.01)  | 0.85<br>(0.35-1.35)      | 0.11                         | 0.70<br>(0.24-1.17)     |
| Metformin                   | v Standard therapy            | -0.35<br>(-2.01-1.31)  | -1.59<br>(-2.23--0.94)   | 0.17                         | -1.42<br>(-2.02--0.82)  |
| Metformin                   | v Alpha glucosidase inhibitor | -0.54<br>(-2.08-1.00)  | -0.42<br>(-1.12-0.29)    | 0.88                         | -0.44<br>(-1.08-0.20)   |
| Metformin                   | v Glitinide                   | -2.51<br>(-5.45-0.43)  | -1.76<br>(-2.71--0.81)   | 0.63                         | -1.83<br>(-2.73--0.93)  |
| Sulfonylurea                | v Thiazolidinedione           | -0.87<br>(-1.44--0.29) | -0.92<br>(-1.46--0.38)   | 0.90                         | -0.89<br>(-1.29--0.50)  |
| Sulfonylurea                | v DPP-4 inhibitor             | 1.42<br>(0.79-2.05)    | 1.36<br>(0.89-1.83)      | 0.89                         | 1.38<br>(1.00-1.75)     |
| Sulfonylurea                | v SGLT-2 inhibitor            | 4.25<br>(3.30-5.19)    | 3.46<br>(2.98-3.95)      | 0.15                         | 3.63<br>(3.20-4.06)     |
| Sulfonylurea                | v GLP-1 receptor agonist      | 2.15<br>(1.19-3.11)    | 3.38<br>(2.93-3.82)      | 0.02                         | 3.16<br>(2.75-3.57)     |
| Sulfonylurea                | v Basal insulin               | -0.97<br>(-4.02-2.25)  | -0.27<br>(-0.86-0.32)    | 0.67                         | -0.29<br>(-0.88-0.29)   |
| Sulfonylurea                | v Basal bolus insulin         | 4.42<br>(1.57-7.27)    | -1.59<br>(-2.89--0.29)   | 0.00                         | -0.55<br>(-1.75-0.65)   |

| <b>Intervention</b>         | <b>Comparator</b>             | <b>Direct estimate</b> | <b>Indirect estimate</b> | <b>Incoherence (p value)</b> | <b>Network estimate</b> |
|-----------------------------|-------------------------------|------------------------|--------------------------|------------------------------|-------------------------|
| Sulfonylurea                | v Bolus insulin               | -2.10<br>(-6.98-2.78)  | 1.22<br>(-0.4-2.84)      | 0.21                         | 0.89<br>(-0.65-2.43)    |
| Sulfonylurea                | v Alpha glucosidase inhibitor | 1.01<br>(-1.23-3.24)   | 2.10<br>(1.46-2.75)      | 0.36                         | 2.02<br>(1.40-2.64)     |
| Sulfonylurea                | v Glitinide                   | 0.99<br>(-0.22-2.20)   | 0.29<br>(-0.87-1.46)     | 0.42                         | 0.63<br>(-0.21-1.47)    |
| Thiazolidinedione           | v DPP-4 inhibitor             | 1.84<br>(0.97-2.72)    | 2.36<br>(1.96-2.77)      | 0.29                         | 2.27<br>(1.91-2.64)     |
| Thiazolidinedione           | v SGLT-2 inhibitor            | 4.27<br>(2.40-6.14)    | 4.54<br>(4.1-4.98)       | 0.78                         | 4.52<br>(4.10-4.95)     |
| Thiazolidinedione           | v GLP-1 receptor agonist      | 3.95<br>(2.09-5.00)    | 4.07<br>(3.65-4.49)      | 0.83                         | 4.05<br>(3.66-4.44)     |
| Thiazolidinedione           | v Basal insulin               | 1.30<br>(-0.79-3.39)   | 0.54<br>(-0.04-1.13)     | 0.50                         | 0.60<br>(0.03-1.17)     |
| Thiazolidinedione           | v Basal bolus insulin         | -1.01<br>(-3.69-1.67)  | 0.68<br>(-0.66-2.02)     | 0.27                         | 0.34<br>(-0.85-1.54)    |
| Thiazolidinedione           | v Standard therapy            | 0.63<br>(-0.91-2.17)   | 2.12<br>(1.53-2.72)      | 0.08                         | 1.93<br>(1.37-2.49)     |
| Thiazolidinedione           | v Alpha glucosidase inhibitor | 2.37<br>(0.79-3.96)    | 3.00<br>(2.35-3.65)      | 0.47                         | 2.91<br>(2.31-3.51)     |
| Thiazolidinedione           | v Glitinide                   | 1.22<br>(-1.03-3.47)   | 1.57<br>(0.64-2.51)      | 0.78                         | 1.52<br>(0.66-2.38)     |
| DPP-4 inhibitor             | v SGLT-2 inhibitor            | 2.10<br>(1.24-2.96)    | 2.28<br>(1.89-2.67)      | 0.7                          | 2.25<br>(1.90-2.61)     |
| DPP-4 inhibitor             | v GLP-1 receptor agonist      | 1.74<br>(1.12-2.37)    | 1.79<br>(1.43-2.15)      | 0.90                         | 1.78<br>(1.47-2.09)     |
| DPP-4 inhibitor             | v Basal insulin               | -2.07<br>(-3.62--0.53) | -1.62<br>(-2.18--1.07)   | 0.59                         | -1.67<br>(-2.19--1.15)  |
| DPP-4 inhibitor             | v Standard therapy            | -0.42<br>(-1.34-0.5)   | -0.31<br>(-0.92-0.3)     | 0.85                         | -0.34<br>(-0.85-0.16)   |
| DPP-4 inhibitor             | v Alpha glucosidase inhibitor | 1.11<br>(-0.06-2.27)   | 0.50<br>(-0.14-1.14)     | 0.37                         | 0.64<br>(0.08-1.20)     |
| SGLT-2 inhibitor            | v Standard therapy            | -1.92<br>(-3.78--0.05) | -2.66<br>(-3.25--2.07)   | 0.46                         | -2.59<br>(-3.16--2.03)  |
| GLP-1 receptor agonist      | v Basal insulin               | -3.56<br>(-4.14--2.99) | -3.23<br>(-4.04--2.43)   | 0.51                         | -3.45<br>(-3.92--2.98)  |
| GLP-1 receptor agonist      | v Basal bolus insulin         | -4.83<br>(-6.68--2.97) | -2.97<br>(-4.48--1.47)   | 0.13                         | -3.71<br>(-4.88--2.54)  |
| GLP-1 receptor agonist      | v Bolus insulin               | -1.96<br>(-3.53--0.39) | -5.27<br>(-10.2--0.38)   | 0.21                         | -2.27<br>(-3.76--0.77)  |
| GLP-1 receptor agonist      | v Standard therapy            | -1.79<br>(-2.72--0.87) | -2.27<br>(-2.87--1.66)   | 0.4                          | -2.12<br>(-2.63--1.62)  |
| Basal insulin               | v Basal bolus insulin         | -0.88<br>(-2.7-0.94)   | 0.19<br>(-1.36-1.75)     | 0.38                         | -0.26<br>(-1.44-0.92)   |
| Basal insulin               | v Standard therapy            | 0.70<br>(-0.45-1.85)   | 1.58<br>(0.85-2.31)      | 0.21                         | 1.33<br>(0.71-1.94)     |
| Alpha glucosidase inhibitor | v Standard therapy            | -0.77<br>(-3.35-1.81)  | -1.00<br>(-1.74-0.26)    | 0.87                         | -0.98<br>(-1.69--0.27)  |
| Glitinide                   | v Standard therapy            | 0.84<br>(-1.25-2.93)   | 0.30<br>(-0.73-1.33)     | 0.65                         | 0.41<br>(-0.52-1.33)    |

**Table 10 Amputation**

| <b>Intervention</b> | <b>Comparator</b> | <b>Direct estimate</b> | <b>Indirect estimate</b> | <b>Incoherence (p value)</b> | <b>Network estimate</b> |
|---------------------|-------------------|------------------------|--------------------------|------------------------------|-------------------------|
| SGLT-2 inhibitor    | $\nu$ Placebo     | 1.11<br>(0.90-1.36)    | 1.37<br>(0.05-34.5)      | 0.90                         | 1.14<br>(0.96-1.35)     |

**Table 11 Neuropathic pain**

| <b>Intervention</b>    | <b>Comparator</b> | <b>Direct estimate</b> | <b>Indirect estimate</b> | <b>Incoherence (p value)</b> | <b>Network estimate</b> |
|------------------------|-------------------|------------------------|--------------------------|------------------------------|-------------------------|
| GLP-1 receptor agonist | v Placebo         | 0.33<br>(0.07-1.65)    | 1.50<br>(0.62-3.64)      | 0.002                        | 0.33<br>(0.01-8.19)     |

**Table 12 Diabetic ketoacidosis**

| <b>Intervention</b>    |   | <b>Comparator</b>      | <b>Direct estimate</b> | <b>Indirect estimate</b> | <b>Incoherence (p value)</b> | <b>Network estimate</b> |
|------------------------|---|------------------------|------------------------|--------------------------|------------------------------|-------------------------|
| SGLT-2 inhibitor       | v | Placebo                | 1.16<br>(0.66-2.05)    | 0.41<br>(0.03-5.17)      | 0.27                         | 1.04<br>(0.61-1.78)     |
| GLP-1 receptor agonist | v | Placebo                | 0.50<br>(0.26-0.97)    | 1.59<br>(0.38-6.70)      | 0.15                         | 0.61<br>(0.33-1.11)     |
| SGLT-2 inhibitor       | v | GLP-1 receptor agonist | 0.66<br>(0.09-4.64)    | 2.04<br>(0.88,4.73)      | 0.30                         | 1.71<br>(0.79-3.69)     |
| DPP-4 inhibitor        | v | Placebo                | 0.94<br>(0.23-1.67)    | 0.66<br>(0.13,3.27)      | 0.68                         | 0.91<br>(0.53-1.54)     |
| Sulfonylurea           | v | DPP-4 inhibitor        | 0.94<br>(0.23-3.78)    | 1.64<br>(0.20-13.6)      | 0.67                         | 1.11<br>(0.35-3.52)     |
| Sulfonylurea           | v | SGLT-2 inhibitor       | 1.35<br>(0.19-9.64)    | 0.78<br>(0.16-3.83)      | 0.67                         | 0.97<br>(0.28-3.30)     |
| DPP-4 inhibitor        | v | GLP-1 receptor agonist | 0.66<br>(0.09-4.71)    | 1.73<br>(0.74-4.00)      | 0.38                         | 1.49<br>(0.69-3.20)     |

**Table 13 Serious hyperglycaemia**

| <b>Intervention</b>    | <b>Comparator</b>        | <b>Direct estimate</b> | <b>Indirect estimate</b> | <b>Incoherence (p value)</b> | <b>Network estimate</b> |
|------------------------|--------------------------|------------------------|--------------------------|------------------------------|-------------------------|
| SGLT-2 inhibitor       | v Placebo                | 0.64<br>(0.36-1.16)    | 0.41<br>(0.12-1.42)      | 0.52                         | 0.59<br>(0.35-1.01)     |
| GLP-1 receptor agonist | v Placebo                | 0.42<br>(0.24-0.72)    | 0.34<br>(0.13-0.92)      | 0.71                         | 0.40<br>(0.25-0.64)     |
| SGLT-2 inhibitor       | v GLP-1 receptor agonist | 1.49<br>(0.17-12.86)   | 1.48<br>(0.72-3.04)      | 1.00                         | 1.48<br>(0.75-2.93)     |
| Metformin              | v Placebo                | 0.31<br>(0.04-2.64)    | 0.49<br>(0.09-2.78)      | 0.73                         | 0.41<br>(0.10-1.60)     |
| Sulfonylurea           | v Placebo                | 0.28<br>(0.09-0.92)    | 0.58<br>(0.24-1.40)      | 0.35                         | 0.45<br>(0.22-0.91)     |
| DPP-4 inhibitor        | v Placebo                | 0.62<br>(0.43-0.91)    | 0.63<br>(0.25-1.56)      | 0.98                         | 0.62<br>(0.44-0.88)     |
| Metformin              | v Thiazolidinedione      | 0.66<br>(0.07-6.57)    | 0.28<br>(0.03-2.64)      | 0.61                         | 0.43<br>(0.09-2.11)     |
| Metformin              | v DPP-4 inhibitor        | 0.81<br>(0.16-4.13)    | 0.39<br>(0.03-4.92)      | 0.63                         | 0.66<br>(0.17-2.57)     |
| Metformin              | v GLP-1 receptor agonist | 0.64<br>(0.07-5.51)    | 1.40<br>(0.24-8.29)      | 0.58                         | 1.02<br>(0.25-4.11)     |
| Sulfonylurea           | v Thiazolidinedione      | 0.66<br>(0.08-5.66)    | 0.41<br>(0.10-1.61)      | 0.71                         | 0.47<br>(0.15-1.48)     |
| Sulfonylurea           | v DPP-4 inhibitor        | 0.92<br>(0.35-2.40)    | 0.53<br>(0.19-1.51)      | 0.45                         | 0.72<br>(0.36-1.45)     |
| Sulfonylurea           | v SGLT-2 inhibitor       | 1.47<br>(0.17-12.60)   | 0.67<br>(0.27-1.67)      | 0.51                         | 0.75<br>(0.32-1.75)     |
| Sulfonylurea           | v GLP-1 receptor agonist | 0.44<br>(0.10-1.82)    | 1.61<br>(0.65-4.00)      | 0.12                         | 0.89<br>(0.41-1.96)     |
| Thiazolidinedione      | v DPP-4 inhibitor        | 1.00<br>(0.10-9.99)    | 1.72<br>(0.52-5.70)      | 0.68                         | 1.54<br>(0.53-4.43)     |
| Thiazolidinedione      | v GLP-1 receptor agonist | 1.02<br>(0.12-8.77)    | 3.13<br>(0.92-10.7)      | 0.37                         | 2.39<br>(0.82-7.00)     |
| Thiazolidinedione      | v Basal insulin          | 5.87<br>(0.82-41.78)   | 1.82<br>(0.40-8.25)      | 0.35                         | 2.81<br>(0.85-9.31)     |
| Thiazolidinedione      | v Standard therapy       | 0.65<br>(0.16-2.67)    | 0.47<br>(0.07-3.17)      | 0.79                         | 0.58<br>(0.19-1.79)     |
| DPP-4 inhibitor        | v SGLT-2 inhibitor       | 1.62<br>(0.34-7.80)    | 0.97<br>(0.50-1.88)      | 0.56                         | 1.05<br>(0.57-1.93)     |
| DPP-4 inhibitor        | v GLP-1 receptor agonist | 1.21<br>(0.46-3.18)    | 1.75<br>(0.92-3.35)      | 0.54                         | 1.56<br>(0.92-2.65)     |
| DPP-4 inhibitor        | v Standard therapy       | 0.64<br>(0.36-1.16)    | 0.41<br>(0.12-1.42)      | 0.70                         | 0.38<br>(0.12-1.18)     |
| GLP-1 receptor agonist | v Basal insulin          | 1.02<br>(0.43-2.41)    | 3.30<br>(0.32-33.6)      | 0.35                         | 1.18<br>(0.52-2.64)     |

**Table 14 Genital infection**

| <b>Intervention</b>    |   | <b>Comparator</b>      | <b>Direct estimate</b> | <b>Indirect estimate</b> | <b>Incoherence (p value)</b> | <b>Network estimate</b> |
|------------------------|---|------------------------|------------------------|--------------------------|------------------------------|-------------------------|
| SGLT-2 inhibitor       | v | Placebo                | 3.54<br>(3.04-4.12)    | 2.24<br>(0.90-5.62)      | 0.34                         | 3.50<br>(3.01-4.07)     |
| GLP-1 receptor agonist | v | Placebo                | 1.14<br>(0.18-7.26)    | 0.64<br>(0.29-1.40)      | 0.57                         | 0.70<br>(0.34-1.44)     |
| SGLT-2 inhibitor       | v | GLP-1 receptor agonist | 5.45<br>(2.52-11.8)    | 3.05<br>(0.48-19.5)      | 0.57                         | 5.00<br>(2.45-10.2)     |
| DPP-4 inhibitor        | v | Placebo                | 0.49<br>(0.21-1.15)    | 0.89<br>(0.52-1.52)      | 0.26                         | 0.75<br>(0.48-1.17)     |
| DPP-4 inhibitor        | v | SGLT-2 inhibitor       | 0.25<br>(0.15-0.41)    | 0.12<br>(0.05-0.30)      | 0.18                         | 0.21<br>(0.14-0.33)     |

**Table 15 Severe gastrointestinal events**

| <b>Intervention</b>    | <b>Comparator</b>        | <b>Direct estimate</b> | <b>Indirect estimate</b> | <b>Incoherence (p value)</b> | <b>Network estimate</b> |
|------------------------|--------------------------|------------------------|--------------------------|------------------------------|-------------------------|
| GLP-1 receptor agonist | v Placebo                | 2.43<br>(1.29-4.60)    | 2.48<br>(0.40-15.4)      | 0.99                         | 2.46<br>(1.22-4.97)     |
| DPP-4 inhibitor        | v Placebo                | 1.73<br>(0.66,4.56)    | 1.83<br>(0.43,7.69)      | 0.99                         | 1.76<br>(0.42-7.34)     |
| Metformin              | v Sulfonylurea           | 2.16<br>(0.32-14.6)    | 6.12<br>(0.14-271)       | 0.63                         | 2.64<br>(0.48-14.5)     |
| Metformin              | v Thiazolidinedione      | 1.62<br>(0.35-7.50)    | 1.33<br>(0.05-32.3)      | 0.91                         | 1.54<br>(0.40-5.91)     |
| Metformin              | v Standard therapy       | 1.99<br>(0.12-31.7)    | 3.30<br>(0.41-26.6)      | 0.77                         | 2.73<br>(0.53-13.9)     |
| DPP-4 inhibitor        | v GLP-1 receptor agonist | 0.63<br>(0.18-2.23)    | 0.82<br>(0.21-3.17)      | 0.78                         | 0.71<br>(0.29-1.77)     |
| DPP-4 inhibitor        | v Basal insulin          | 0.90<br>(0.04-19.5)    | 0.17<br>(0.03-1.08)      | 0.36                         | 0.26<br>(0.05-1.29)     |
| GLP-1 receptor agonist | v Basal insulin          | 0.26<br>(0.05-1.31)    | 1.42<br>(0.06-35.4)      | 0.36                         | 0.37<br>(0.09-1.55)     |



**Table 16 Pancreatic cancer**

| <b>Intervention</b>    | <b>Comparator</b>        | <b>Direct estimate</b> | <b>Indirect estimate</b> | <b>Incoherence (p value)</b> | <b>Network estimate</b> |
|------------------------|--------------------------|------------------------|--------------------------|------------------------------|-------------------------|
| SGLT-2 inhibitor       | v Placebo                | 1.60<br>(0.45-5.63)    | 3.63<br>(0.13-100.4)     | 0.65                         | 1.77<br>(0.55-5.75)     |
| GLP-1 receptor agonist | v Placebo                | 1.23<br>(0.81-1.86)    | 0.52<br>(0.06-4.57)      | 0.45                         | 1.19<br>(0.78-1.81)     |
| DPP-4 inhibitor        | v Placebo                | 0.84<br>(0.49-1.44)    | 1.24<br>(0.20-7.77)      | 0.69                         | 0.86<br>(0.51-1.45)     |
| Sulfonylurea           | v DPP-4 inhibitor        | 1.35<br>(0.69-2.62)    | 0.59<br>(0.02-19.52)     | 0.65                         | 1.32<br>(0.68-2.55)     |
| Sulfonylurea           | v SGLT-2 inhibitor       | 0.33<br>(0.01-8.14)    | 0.74<br>(0.16-3.34)      | 0.45                         | 0.64<br>(0.16-2.51)     |
| DPP-4 inhibitor        | v GLP-1 receptor agonist | 1.57<br>(0.19-12.9)    | 0.67<br>(0.34-1.32)      | 0.45                         | 0.73<br>(0.37-1.42)     |

**Table 17 Pancreatitis**

| <b>Intervention</b>    | <b>Comparator</b>        | <b>Direct estimate</b> | <b>Indirect estimate</b> | <b>Incoherence (p value)</b> | <b>Network estimate</b> |
|------------------------|--------------------------|------------------------|--------------------------|------------------------------|-------------------------|
| SGLT-2 inhibitor       | v Placebo                | 0.64<br>(0.23-1.11)    | 0.63<br>(0.20-1.98)      | 0.97                         | 0.64<br>(0.39-1.05)     |
| GLP-1 receptor agonist | v Placebo                | 1.14<br>(0.85-1.52)    | 1.88<br>(0.70-5.00)      | 0.34                         | 1.18<br>(0.90-1.56)     |
| SGLT-2 inhibitor       | v GLP-1 receptor agonist | 0.62<br>(0.08-5.05)    | 0.54<br>(0.30-0.95)      | 0.90                         | 0.54<br>(0.31-0.94)     |
| Sulfonylurea           | v Placebo                | 0.85<br>(0.08-9.19)    | 1.55<br>(0.55-4.35)      | 0.66                         | 1.40<br>(0.56-3.49)     |
| Thiazolidinedione      | v Placebo                | 0.45<br>(0.03-7.27)    | 1.32<br>(0.45-3.84)      | 0.48                         | 1.15<br>(0.42-3.10)     |
| DPP-4 inhibitor        | v Placebo                | 1.54<br>(1.05-2.26)    | 1.12<br>(0.46-2.72)      | 0.52                         | 1.46<br>(1.03-2.08)     |
| Metformin              | v Thiazolidinedione      | 0.66<br>(0.01-33.6)    | 0.20<br>(0.00-38.5)      | 0.72                         | 0.43<br>(0.02-9.95)     |
| Metformin              | v DPP-4 inhibitor        | 0.22<br>(0.01-5.42)    | 2.17<br>(0.01-398)       | 0.39                         | 0.34<br>(0.02-7.11)     |
| Metformin              | v GLP-1 receptor agonist | 1.01<br>(0.02-51.0)    | 0.11<br>(0.00-14.4)      | 0.49                         | 0.42<br>(0.02-8.91)     |
| Sulfonylurea           | v Thiazolidinedione      | 2.96<br>(0.12,72.8)    | 1.03<br>(0.26,4.14)      | 0.56                         | 1.22<br>(0.34-4.33)     |
| Sulfonylurea           | v DPP-4 inhibitor        | 0.89<br>(0.20-4.04)    | 1.00<br>(0.29-3.45)      | 0.91                         | 0.95<br>(0.37-2.42)     |
| Sulfonylurea           | v SGLT-2 inhibitor       | 2.83<br>(0.58-13.7)    | 1.87<br>(0.56-6.25)      | 0.68                         | 2.17<br>(0.83-5.66)     |
| Sulfonylurea           | v GLP-1 receptor agonist | 0.95<br>(0.19-4.68)    | 1.31<br>(0.42-4.07)      | 0.75                         | 1.18<br>(0.47-2.99)     |
| Thiazolidinedione      | v DPP-4 inhibitor        | 1.20<br>(0.26-5.64)    | 0.57<br>(0.15-2.16)      | 0.47                         | 0.78<br>(0.29-2.14)     |
| Thiazolidinedione      | v GLP-1 receptor agonist | 0.96<br>(0.26-3.55)    | 0.98<br>(0.22-4.36)      | 0.99                         | 0.97<br>(0.36-2.61)     |
| Thiazolidinedione      | v Basal bolus insulin    | 1.01<br>(0.02-51.5)    | 9.93<br>(0.04,2401)      | 0.51                         | 2.19<br>(0.09-52.7)     |
| Thiazolidinedione      | v Standard therapy       | 2.51<br>(0.79-8.03)    | 0.60<br>(0.02-21.4)      | 0.45                         | 2.19<br>(0.73-6.58)     |
| DPP-4 inhibitor        | v SGLT-2 inhibitor       | 1.87<br>(0.27-11.9)    | 2.34<br>(1.26-4.32)      | 0.82                         | 2.28<br>(1.27-4.08)     |
| DPP-4 inhibitor        | v GLP-1 receptor agonist | 0.81<br>(0.27-2.41)    | 1.34<br>(0.84-2.13)      | 0.41                         | 1.24<br>(0.81-1.90)     |
| GLP-1 receptor agonist | v Basal insulin          | 2.12<br>(0.63-7.13)    | 8.94<br>(0.25-315.5)     | 0.45                         | 2.45<br>(0.78-7.66)     |
| GLP-1 receptor agonist | v Basal bolus insulin    | 2.94<br>(0.12-72.7)    | 0.30<br>(0.00-254.7)     | 0.51                         | 2.26<br>(0.10-50.2)     |
| Basal insulin          | v Standard therapy       | 0.32<br>(0.01-7.99)    | 1.36<br>(0.19-9.77)      | 0.45                         | 0.92<br>(0.17-4.90)     |

**Table 18 Glycated haemoglobin A1C**

| <b>Intervention</b>         |   | <b>Comparator</b>           | <b>Direct estimate</b> | <b>Indirect estimate</b> | <b>Incoherence (p value)</b> | <b>Network estimate</b> |
|-----------------------------|---|-----------------------------|------------------------|--------------------------|------------------------------|-------------------------|
| SGLT-2 inhibitor            | v | Placebo                     | -0.59<br>(-0.68--0.51) | -0.63<br>(-0.75--0.51)   | 0.62                         | -0.60<br>(-0.67--0.54)  |
| GLP-1 receptor agonist      | v | Placebo                     | -0.87<br>(-0.95--0.78) | -0.92<br>(-1.02--0.81)   | 0.44                         | -0.89<br>(-0.95--0.82)  |
| SGLT-2 inhibitor            | v | GLP-1 receptor agonist      | 0.40<br>(0.11-0.69)    | 0.27<br>(0.18-0.36)      | 0.39                         | 0.28<br>(0.19-0.37)     |
| Metformin                   | v | Placebo                     | -0.91<br>(-1.10--0.71) | -0.77<br>(-0.87--0.67)   | 0.23                         | -0.80<br>(-0.89--0.71)  |
| Sulfonylurea                | v | Placebo                     | -0.87<br>(-1.14--0.60) | -0.63<br>(-0.72--0.55)   | 0.10                         | -0.65<br>(-0.74--0.57)  |
| Thiazolidinedione           | v | Placebo                     | -0.74<br>(-0.86--0.63) | -0.68<br>(-0.77--0.59)   | 0.40                         | -0.71<br>(-0.78--0.63)  |
| DPP-4 inhibitor             | v | Placebo                     | -0.55<br>(-0.62--0.48) | -0.66<br>(-0.75--0.57)   | 0.06                         | -0.60<br>(-0.65--0.54)  |
| Basal insulin               | v | Placebo                     | -0.88<br>(-1.35--0.42) | -0.74<br>(-0.85--0.62)   | 0.54                         | -0.74<br>(-0.86--0.63)  |
| Alpha glucosidase inhibitor | v | Placebo                     | -0.63<br>(-0.76--0.49) | -0.4<br>(-0.56--0.25)    | 0.03                         | -0.53<br>(-0.63--0.43)  |
| Glitinide                   | v | Placebo                     | -0.74<br>(-1.13--0.35) | -0.74<br>(-0.92--0.56)   | 0.99                         | -0.74<br>(-0.90--0.58)  |
| Metformin                   | v | Sulfonylurea                | -0.15<br>(-0.38-0.08)  | -0.14<br>(-0.26--0.03)   | 0.99                         | -0.15<br>(-0.25--0.04)  |
| Metformin                   | v | Thiazolidinedione           | -0.13<br>(-0.28-0.02)  | -0.07<br>(-0.19-0.05)    | 0.53                         | -0.09<br>(-0.19-0.00)   |
| Metformin                   | v | DPP-4 inhibitor             | -0.2<br>(-0.39--0.01)  | -0.21<br>(-0.31--0.10)   | 0.96                         | -0.20<br>(-0.30--0.11)  |
| Metformin                   | v | SGLT-2 inhibitor            | 0.04<br>(-0.26-0.34)   | -0.23<br>(-0.34--0.12)   | 0.11                         | -0.20<br>(-0.30--0.09)  |
| Metformin                   | v | GLP-1 receptor agonist      | 0.15<br>(-0.18-0.47)   | 0.08<br>(-0.03-0.19)     | 0.70                         | 0.09<br>(-0.02-0.19)    |
| Metformin                   | v | Basal insulin               | -0.38<br>(-0.85-0.10)  | -0.03<br>(-0.17-0.11)    | 0.17                         | -0.06<br>(-0.19-0.08)   |
| Metformin                   | v | Standard therapy            | -0.29<br>(-0.58-0.01)  | -0.66<br>(-0.79--0.53)   | 0.02                         | -0.60<br>(-0.72--0.48)  |
| Metformin                   | v | Alpha glucosidase inhibitor | -0.32<br>(-0.69-0.06)  | -0.26<br>(-0.4--0.13)    | 0.80                         | -0.27<br>(-0.40--0.14)  |
| Metformin                   | v | Glitinide                   | -0.24<br>(-0.71-0.23)  | -0.03<br>(-0.22-0.16)    | 0.43                         | -0.06<br>(-0.23-0.11)   |
| Sulfonylurea                | v | Thiazolidinedione           | 0.06<br>(-0.05-0.18)   | 0.04<br>(-0.08-0.15)     | 0.76                         | 0.05<br>(-0.03-0.13)    |
| Sulfonylurea                | v | DPP-4 inhibitor             | -0.03<br>(-0.17-0.11)  | -0.08<br>(-0.18-0.02)    | 0.59                         | -0.06<br>(-0.14-0.02)   |
| Sulfonylurea                | v | SGLT-2 inhibitor            | -0.06<br>(-0.28-0.17)  | -0.05<br>(-0.15-0.06)    | 0.95                         | -0.05<br>(-0.15-0.05)   |
| Sulfonylurea                | v | GLP-1 receptor agonist      | 0.24<br>(-0.02-0.50)   | 0.23<br>(0.13-0.33)      | 0.94                         | 0.23<br>(0.14-0.32)     |

| Intervention           | Comparator                    | Direct estimate        | Indirect estimate      | Incoherence (p value) | Network estimate       |
|------------------------|-------------------------------|------------------------|------------------------|-----------------------|------------------------|
| Sulfonylurea           | v Basal insulin               | -0.03<br>(-0.5-0.45)   | 0.10<br>(-0.03-0.23)   | 0.62                  | 0.09<br>(-0.04-0.22)   |
| Sulfonylurea           | v Basal bolus insulin         | 1.60<br>(0.44-2.76)    | 0.07<br>(-0.29-0.44)   | 0.01                  | 0.21<br>(-0.14-0.56)   |
| Sulfonylurea           | v Bolus insulin               | 0.20<br>(-0.52-0.92)   | 0.27<br>(-0.02-0.56)   | 0.86                  | 0.26<br>(-0.01-0.53)   |
| Sulfonylurea           | v Standard therapy            | -0.79<br>(-1.44--0.14) | -0.45<br>(-0.56--0.33) | 0.31                  | -0.46<br>(-0.57--0.35) |
| Sulfonylurea           | v Alpha glucosidase inhibitor | -0.18<br>(-0.45-0.09)  | -0.11<br>(-0.24-0.02)  | 0.65                  | -0.12<br>(-0.24--0.00) |
| Sulfonylurea           | v Glitinide                   | 0.10<br>(-0.1-0.31)    | 0.06<br>(-0.19-0.31)   | 0.78                  | 0.08<br>(-0.07-0.24)   |
| Thiazolidinedione      | v DPP-4 inhibitor             | -0.10<br>(-0.3-0.1)    | -0.11<br>(-0.2--0.03)  | 0.90                  | -0.11<br>(-0.19--0.03) |
| Thiazolidinedione      | v SGLT-2 inhibitor            | -0.10<br>(-0.55-0.35)  | -0.10<br>(-0.19--0.01) | 0.99                  | -0.10<br>(-0.19--0.01) |
| Thiazolidinedione      | v GLP-1 receptor agonist      | 0.04<br>(-0.24-0.32)   | 0.20<br>(0.1-0.29)     | 0.29                  | 0.18<br>(0.09-0.27)    |
| Thiazolidinedione      | v Basal insulin               | 0.35<br>(0-0.7)        | 0.00<br>(-0.13-0.13)   | 0.07                  | 0.04<br>(-0.08-0.16)   |
| Thiazolidinedione      | v Basal bolus insulin         | 0.00<br>(-1.3-1.3)     | 0.17<br>(-0.19-0.53)   | 0.80                  | 0.16<br>(-0.19-0.51)   |
| Thiazolidinedione      | v Standard therapy            | -0.39<br>(-0.58--0.20) | -0.56<br>(-0.68--0.43) | 0.14                  | -0.51<br>(-0.61--0.40) |
| Thiazolidinedione      | v Alpha glucosidase inhibitor | -0.21<br>(-0.57-0.14)  | -0.17<br>(-0.29--0.05) | 0.83                  | -0.17<br>(-0.29--0.06) |
| Thiazolidinedione      | v Glitinide                   | 0.05<br>(-0.42-0.52)   | 0.03<br>(-0.14-0.21)   | 0.94                  | 0.03<br>(-0.13-0.20)   |
| DPP-4 inhibitor        | v SGLT-2 inhibitor            | 0.03<br>(-0.15-0.20)   | 0.01<br>(-0.08-0.09)   | 0.84                  | 0.01<br>(-0.07-0.09)   |
| DPP-4 inhibitor        | v GLP-1 receptor agonist      | 0.32<br>(0.18-0.46)    | 0.28<br>(0.20-0.36)    | 0.65                  | 0.29<br>(0.22-0.36)    |
| DPP-4 inhibitor        | v Basal insulin               | -0.04<br>(-0.36-0.28)  | 0.18<br>(0.05-0.30)    | 0.21                  | 0.15<br>(0.03-0.26)    |
| DPP-4 inhibitor        | v Standard therapy            | -0.47<br>(-0.62--0.31) | -0.36<br>(-0.48--0.24) | 0.29                  | -0.40<br>(-0.49--0.30) |
| DPP-4 inhibitor        | v Alpha glucosidase inhibitor | -0.33<br>(-0.58--0.09) | 0.00<br>(-0.12-0.11)   | 0.02                  | -0.06<br>(-0.17-0.04)  |
| SGLT-2 inhibitor       | v Basal insulin               | -0.02<br>(-0.7-0.66)   | 0.14<br>(0.02-0.27)    | 0.64                  | 0.14<br>(0.01-0.26)    |
| SGLT-2 inhibitor       | v Standard therapy            | -0.44<br>(-0.81--0.07) | -0.4<br>(-0.52--0.29)  | 0.87                  | -0.41<br>(-0.52--0.30) |
| GLP-1 receptor agonist | v Basal insulin               | -0.16<br>(-0.31--0.02) | -0.12<br>(-0.28-0.04)  | 0.68                  | -0.14<br>(-0.25--0.04) |
| GLP-1 receptor agonist | v Basal bolus insulin         | 0.00<br>(-0.45-0.44)   | -0.04<br>(-0.57-0.48)  | 0.91                  | -0.02<br>(-0.36-0.32)  |
| GLP-1 receptor agonist | v Bolus insulin               | -0.08<br>(-0.43-0.27)  | 0.17<br>(-0.22-0.56)   | 0.35                  | 0.03<br>(-0.23-0.29)   |

| <b>Intervention</b>         |   | <b>Comparator</b>   | <b>Direct estimate</b> | <b>Indirect estimate</b> | <b>Incoherence (p value)</b> | <b>Network estimate</b> |
|-----------------------------|---|---------------------|------------------------|--------------------------|------------------------------|-------------------------|
| GLP-1 receptor agonist      | v | Standard therapy    | -0.66<br>(-0.87--0.45) | -0.70<br>(-0.81--0.58)   | 0.75                         | -0.69<br>(-0.79--0.59)  |
| Basal insulin               | v | Basal bolus insulin | -0.3<br>(-0.94-0.34)   | 0.29<br>(-0.12-0.71)     | 0.13                         | 0.12<br>(-0.22-0.47)    |
| Basal insulin               | v | Bolus insulin       | 0.38<br>(-0.07-0.83)   | 0.06<br>(-0.28-0.39)     | 0.26                         | 0.17<br>(-0.10-0.44)    |
| Basal insulin               | v | Standard therapy    | -0.68<br>(-0.96--0.40) | -0.51<br>(-0.66--0.36)   | 0.30                         | -0.55<br>(-0.68--0.42)  |
| Alpha glucosidase inhibitor | v | Standard therapy    | 0.36<br>(-0.01-0.73)   | 0.33<br>(0.19-0.47)      | 0.89                         | -0.33<br>(-0.46--0.20)  |
| Glitinide                   | v | Standard therapy    | 0.63<br>(0.09-1.18)    | 0.53<br>(0.34-0.72)      | 0.73                         | -0.54<br>(-0.72--0.36)  |
| Alpha glucosidase inhibitor | v | Glitinide           | 0.12<br>(-0.43-0.66)   | 0.22<br>(0.03-0.42)      | 0.72                         | 0.21<br>(0.02-0.39)     |

## Appendix 7 Network meta-analysis treatment estimates

**Table 1 All-cause mortality**

The columns present the row drug class compared to the column drug class. The rows present the row drug class compared to the column drug class. The effect estimates are expressed as odds ratios and 95% confidence intervals. For example, the odds ratio for death from any cause with SGLT-2 inhibitors compared to GLP-1 receptor agonists is 0.88 (95% confidence interval 0.79 to 0.97). For the reverse, the effect of a GLP-1 receptor compared to SGLT-2 inhibitor on the odds of death is 1.05 (0.95 to 1.16) (95% confidence interval 1.03 to 1.26).

|                   |                        |                   |                   |                   |                   |                   |                     |                    |                             |                   |                   |                   |
|-------------------|------------------------|-------------------|-------------------|-------------------|-------------------|-------------------|---------------------|--------------------|-----------------------------|-------------------|-------------------|-------------------|
| SGLT-2 inhibitor  | 1.05 (0.95, 1.16)      | 1.24 (0.88, 1.74) | 1.33 (1.13, 1.57) | 1.22 (1.01, 1.47) | 1.20 (1.08, 1.34) | 1.32(0.77, 2.25)  | 0.95 (0.22, 4.01)   | 1.17 (0.12, 11.48) | 1.07 (0.36, 3.14)           | 1.96 (0.63, 6.10) | 1.18 (1.09, 1.27) | 1.43 (1.07, 1.90) |
| 0.95 (0.86, 1.06) | GLP-1 receptor agonist | 1.17 (0.84,1.65)  | 1.26 (1.08,1.48)  | 1.16 (0.97,1.38)  | 1.15 (1.05,1.26)  | 1.26 (0.74,2.12)  | 0.90 (0.21,3.80)    | 1.11 (0.11,10.91)  | 1.02 (0.35,2.99)            | 1.86 (0.60,5.80)  | 1.14 (1.07,1.21)  | 1.36 (1.03,1.79)  |
| 0.81 (0.57, 1.14) | 0.85 (0.61,1.19)       | Metformin         | 1.08 (0.77,1.50)  | 0.99 (0.71,1.38)  | 0.98 (0.70,1.36)  | 1.07 (0.58,1.99)  | 0.77 (0.18,3.36)    | 0.95 (0.09,9.52)   | 0.86 (0.28,2.65)            | 1.58 (0.49,5.09)  | 0.97 (0.69,1.35)  | 1.16 (0.77,1.72)  |
| 0.75 (0.64, 0.89) | 0.79 (0.68,0.92)       | 0.93 (0.67,1.29)  | Sulfonylurea      | 0.92 (0.76,1.10)  | 0.91 (0.79,1.04)  | 0.99 (0.58,1.71)  | 0.71 (0.17,3.02)    | 0.88 (0.09,8.67)   | 0.80 (0.27,2.36)            | 1.47 (0.47,4.57)  | 0.90 (0.78,1.04)  | 1.07 (0.81,1.43)  |
| 0.82 (0.68, 0.99) | 0.86 (0.72,1.03)       | 1.01 (0.73,1.41)  | 1.09 (0.91,1.31)  | Thiazolidinedione | 0.99 (0.83,1.17)  | 1.08 (0.63,1.87)  | 0.78 (0.18,3.31)    | 0.96 (0.10,9.47)   | 0.88 (0.30,2.60)            | 1.61 (0.51,5.02)  | 0.98 (0.83,1.15)  | 1.17 (0.93,1.47)  |
| 0.83 (0.75, 0.92) | 0.87 (0.79,0.96)       | 1.02 (0.73,1.43)  | 1.10 (0.96,1.26)  | 1.01 (0.85,1.20)  | DPP-4 inhibitor   | 1.10 (0.65,1.86)  | 0.79 (0.19,3.32)    | 0.97 (0.10,9.52)   | 0.88 (0.30,2.60)            | 1.62 (0.52,5.05)  | 0.99 (0.92,1.06)  | 1.18 (0.90,1.56)  |
| 0.76 (0.45, 1.29) | 0.80 (0.47,1.34)       | 0.93 (0.50,1.73)  | 1.01 (0.58,1.73)  | 0.92 (0.53,1.59)  | 0.91 (0.54,1.55)  | Basal insulin     | 0.72 (0.16,3.18)    | 0.89 (0.09,8.68)   | 0.81 (0.24,2.68)            | 1.48 (0.42,5.17)  | 0.90 (0.53,1.53)  | 1.08 (0.61,1.92)  |
| 1.05 (0.25, 4.45) | 1.11 (0.26,4.65)       | 1.30 (0.30,5.67)  | 1.40 (0.33,5.91)  | 1.28 (0.30,5.44)  | 1.27 (0.30,5.35)  | 1.39 (0.31,6.15)  | Basal bolus insulin | 1.23 (0.08,18.06)  | 1.12 (0.19,6.76)            | 2.06 (0.33,12.83) | 1.26 (0.30,5.29)  | 1.50 (0.35,6.47)  |
| 0.85 (0.09, 8.39) | 0.90 (0.09,8.78)       | 1.05 (0.11,10.57) | 1.13 (0.12,11.16) | 1.04 (0.11,10.24) | 1.03 (0.11,10.10) | 1.13 (0.12,11.04) | 0.81 (0.06,11.88)   | Bolus insulin      | 0.91 (0.07,11.36)           | 1.67 (0.13,21.35) | 1.02 (0.10,9.98)  | 1.22 (0.12,12.09) |
| 0.94 (0.32, 2.76) | 0.99 (0.33,2.90)       | 1.16 (0.38,3.55)  | 1.25 (0.42,3.66)  | 1.14 (0.39,3.39)  | 1.13 (0.38,3.32)  | 1.24 (0.37,4.10)  | 0.89 (0.15,5.36)    | 1.10 (0.09,13.69)  | Alpha glucosidase inhibitor | 1.83 (0.41,8.10)  | 1.12 (0.38,3.28)  | 1.34 (0.44,4.05)  |
| 0.51 (0.16, 1.60) | 0.54 (0.17,1.68)       | 0.63 (0.20,2.03)  | 0.68 (0.22,2.11)  | 0.62 (0.20,1.95)  | 0.62 (0.20,1.92)  | 0.68 (0.19,2.36)  | 0.49 (0.08,3.03)    | 0.60 (0.05,7.66)   | 0.55 (0.12,2.41)            | Glitinide         | 0.61 (0.20,1.90)  | 0.73 (0.23,2.33)  |
| 0.85 (0.79, 0.92) | 0.88 (0.83,0.94)       | 1.03 (0.74,1.44)  | 1.11 (0.96,1.29)  | 1.02 (0.87,1.20)  | 1.01 (0.94,1.08)  | 1.11 (0.65,1.87)  | 0.80 (0.19,3.35)    | 0.98 (0.10,9.62)   | 0.89 (0.30,2.63)            | 1.64 (0.53,5.10)  | Placebo           | 1.20 (0.91,1.57)  |
| 0.70 (0.53, 0.93) | 0.74 (0.56,0.97)       | 0.87 (0.58,1.29)  | 0.93 (0.70,1.24)  | 0.85 (0.68,1.07)  | 0.85 (0.64,1.12)  | 0.93 (0.52,1.65)  | 0.67 (0.15,2.87)    | 0.82 (0.08,8.16)   | 0.75 (0.25,2.27)            | 1.37 (0.43,4.38)  | 0.84 (0.64,1.10)  | Standard therapy  |

**Table 2 Cardiovascular mortality**

The columns present the row drug class compared to the column drug class. The rows present the row drug class compared to the column drug class. The effect estimates are expressed as odds ratios and 95% confidence intervals. For example, the odds ratio for death from a cardiovascular cause with SGLT-2 inhibitors compared to GLP-1 receptor agonists is 0.96 (95% confidence interval 0.84 to 1.09). For the reverse, the effect of a GLP-1 receptor compared to SGLT-2 inhibitor on the odds of cardiovascular death is 1.04 (95% confidence interval 0.92 to 1.19).

|                     |                        |                      |                      |                     |                     |                      |                      |                      |                             |                      |                      |                      |
|---------------------|------------------------|----------------------|----------------------|---------------------|---------------------|----------------------|----------------------|----------------------|-----------------------------|----------------------|----------------------|----------------------|
| SGLT-2 inhibitor    | 1.04<br>(0.92,1.19)    | 1.13<br>(0.56,2.26)  | 1.20<br>(0.93,1.53)  | 1.16<br>(0.90,1.49) | 1.17<br>(1.02,1.34) | 1.35<br>(0.63,2.87)  | 2.66<br>(0.27,26.20) | 1.18<br>(0.12,11.78) | 1.18<br>(0.25,5.61)         | 0.77<br>(0.13,4.48)  | 1.19<br>(1.08,1.31)  | 1.40<br>(0.93,2.11)  |
| 0.96<br>(0.84,1.09) | GLP-1 receptor agonist | 1.08<br>(0.54,2.17)  | 1.14<br>(0.89,1.46)  | 1.11<br>(0.87,1.43) | 1.12<br>(0.98,1.28) | 1.29<br>(0.61,2.73)  | 2.55<br>(0.26,25.05) | 1.13<br>(0.11,11.24) | 1.13<br>(0.24,5.37)         | 0.74<br>(0.13,4.29)  | 1.14<br>(1.04,1.25)  | 1.34<br>(0.89,2.01)  |
| 0.89<br>(0.44,1.77) | 0.92<br>(0.46,1.85)    | Metformin            | 1.06<br>(0.54,2.09)  | 1.03<br>(0.51,2.09) | 1.04<br>(0.52,2.07) | 1.19<br>(0.43,3.30)  | 2.35<br>(0.22,25.46) | 1.04<br>(0.09,11.51) | 1.05<br>(0.19,5.69)         | 0.68<br>(0.11,4.21)  | 1.05<br>(0.53,2.10)  | 1.24<br>(0.57,2.70)  |
| 0.84<br>(0.65,1.07) | 0.87<br>(0.68,1.12)    | 0.95<br>(0.48,1.87)  | Sulfonylurea         | 0.97<br>(0.72,1.32) | 0.98<br>(0.79,1.22) | 1.13<br>(0.52,2.47)  | 2.22<br>(0.23,21.89) | 0.99<br>(0.10,9.95)  | 0.99<br>(0.21,4.70)         | 0.65<br>(0.11,3.73)  | 1.00<br>(0.79,1.25)  | 1.17<br>(0.75,1.82)  |
| 0.86<br>(0.67,1.11) | 0.90<br>(0.70,1.15)    | 0.97<br>(0.48,1.98)  | 1.03<br>(0.76,1.39)  | Thiazolidinedione   | 1.01<br>(0.79,1.30) | 1.16<br>(0.53,2.52)  | 2.29<br>(0.23,22.74) | 1.02<br>(0.10,10.22) | 1.02<br>(0.21,4.89)         | 0.67<br>(0.11,3.86)  | 1.03<br>(0.81,1.29)  | 1.20<br>(0.86,1.68)  |
| 0.85<br>(0.74,0.98) | 0.89<br>(0.78,1.02)    | 0.96<br>(0.48,1.92)  | 1.02<br>(0.82,1.26)  | 0.99<br>(0.77,1.27) | DPP-4 inhibitor     | 1.15<br>(0.54,2.45)  | 2.26<br>(0.23,22.29) | 1.00<br>(0.10,10.04) | 1.01<br>(0.21,4.77)         | 0.66<br>(0.11,3.81)  | 1.02<br>(0.92,1.12)  | 1.19<br>(0.79,1.79)  |
| 0.74<br>(0.35,1.58) | 0.77<br>(0.37,1.64)    | 0.84<br>(0.30,2.32)  | 0.89<br>(0.41,1.94)  | 0.86<br>(0.40,1.87) | 0.87<br>(0.41,1.86) | Basal insulin        | 1.97<br>(0.18,21.85) | 0.88<br>(0.09,8.71)  | 0.88<br>(0.16,4.93)         | 0.57<br>(0.09,3.86)  | 0.88<br>(0.42,1.87)  | 1.04<br>(0.46,2.35)  |
| 0.38<br>(0.04,3.71) | 0.39<br>(0.04,3.87)    | 0.43<br>(0.04,4.60)  | 0.45<br>(0.05,4.43)  | 0.44<br>(0.04,4.35) | 0.44<br>(0.04,4.35) | 0.51<br>(0.05,5.62)  | Basal bolus insulin  | 0.44<br>(0.02,11.35) | 0.44<br>(0.03,7.03)         | 0.29<br>(0.02,5.17)  | 0.45<br>(0.05,4.41)  | 0.53<br>(0.05,5.35)  |
| 0.85<br>(0.08,8.47) | 0.89<br>(0.09,8.81)    | 0.96<br>(0.09,10.56) | 1.01<br>(0.10,10.21) | 0.98<br>(0.10,9.92) | 1.00<br>(0.10,9.94) | 1.14<br>(0.11,11.38) | 2.25<br>(0.09,57.62) | Bolus insulin        | 1.00<br>(0.06,16.08)        | 0.66<br>(0.04,11.82) | 1.01<br>(0.10,10.07) | 1.18<br>(0.12,12.15) |
| 0.85<br>(0.18,4.02) | 0.88<br>(0.19,4.20)    | 0.96<br>(0.18,5.21)  | 1.01<br>(0.21,4.81)  | 0.98<br>(0.20,4.73) | 0.99<br>(0.21,4.72) | 1.14<br>(0.20,6.42)  | 2.25<br>(0.14,35.62) | 1.00<br>(0.06,16.04) | Alpha glucosidase inhibitor | 0.66<br>(0.06,6.80)  | 1.01<br>(0.21,4.78)  | 1.18<br>(0.24,5.88)  |
| 1.29<br>(0.22,7.48) | 1.35<br>(0.23,7.81)    | 1.46<br>(0.24,8.97)  | 1.54<br>(0.27,8.90)  | 1.50<br>(0.26,8.70) | 1.52<br>(0.26,8.76) | 1.74<br>(0.26,11.71) | 3.43<br>(0.19,60.96) | 1.52<br>(0.08,27.46) | 1.53<br>(0.15,15.83)        | Glitinide            | 1.54<br>(0.27,8.89)  | 1.81<br>(0.30,10.78) |
| 0.84<br>(0.76,0.92) | 0.88<br>(0.80,0.96)    | 0.95<br>(0.48,1.89)  | 1.00<br>(0.80,1.26)  | 0.97<br>(0.77,1.23) | 0.98<br>(0.89,1.09) | 1.13<br>(0.53,2.40)  | 2.23<br>(0.23,21.95) | 0.99<br>(0.10,9.87)  | 0.99<br>(0.21,4.70)         | 0.65<br>(0.11,3.75)  | Placebo              | 1.17<br>(0.79,1.75)  |
| 0.72<br>(0.47,1.08) | 0.75<br>(0.50,1.12)    | 0.81<br>(0.37,1.77)  | 0.86<br>(0.55,1.33)  | 0.83<br>(0.59,1.16) | 0.84<br>(0.56,1.26) | 0.96<br>(0.43,2.19)  | 1.90<br>(0.19,19.35) | 0.84<br>(0.08,8.66)  | 0.85<br>(0.17,4.21)         | 0.55<br>(0.09,3.31)  | 0.85<br>(0.57,1.27)  | Standard therapy     |

**Table 3 Nonfatal myocardial infarction**

The columns present the row drug class compared to the column drug class. The rows present the row drug class compared to the column drug class. The effect estimates are expressed as odds ratios and 95% confidence intervals. For example, the odds ratio for myocardial infarction with SGLT-2 inhibitors compared to GLP-1 receptor agonists is 0.95 (95% confidence interval 0.84 to 1.09). For the reverse, the effect of a GLP-1 receptor compared to SGLT-2 inhibitor on the odds of myocardial infarction is 1.05 (95% confidence interval 0.93 to 1.19).

|                      |                        |                      |                      |                      |                      |                      |                      |                      |                             |                      |                      |                      |
|----------------------|------------------------|----------------------|----------------------|----------------------|----------------------|----------------------|----------------------|----------------------|-----------------------------|----------------------|----------------------|----------------------|
| SGLT-2 inhibitor     | 1.05<br>(0.93,1.19)    | 1.30<br>(0.90,1.90)  | 1.23<br>(0.97,1.56)  | 1.31<br>(0.95,1.82)  | 1.16<br>(1.01,1.33)  | 1.25<br>(0.61,2.56)  | 0.40<br>(0.04,3.95)  | 1.41<br>(0.44,4.46)  | 0.22<br>(0.05,1.00)         | 0.33<br>(0.06,1.86)  | 1.14<br>(1.03,1.27)  | 1.09<br>(0.72,1.65)  |
| 0.95<br>(0.84,1.08)  | GLP-1 receptor agonist | 1.24<br>(0.86,1.80)  | 1.17<br>(0.94,1.47)  | 1.25<br>(0.91,1.72)  | 1.10<br>(0.98,1.25)  | 1.19<br>(0.59,2.41)  | 0.38<br>(0.04,3.75)  | 1.34<br>(0.43,4.22)  | 0.21<br>(0.05,0.95)         | 0.31<br>(0.05,1.77)  | 1.09<br>(1.01,1.17)  | 1.04<br>(0.69,1.56)  |
| 0.77<br>(0.53,1.11)  | 0.81<br>(0.56,1.16)    | Metformin            | 0.94<br>(0.66,1.36)  | 1.01<br>(0.68,1.48)  | 0.89<br>(0.62,1.28)  | 0.96<br>(0.43,2.11)  | 0.30<br>(0.03,3.11)  | 1.08<br>(0.32,3.59)  | 0.17<br>(0.04,0.80)         | 0.25<br>(0.04,1.47)  | 0.88<br>(0.61,1.26)  | 0.84<br>(0.52,1.34)  |
| 0.81<br>(0.64,1.03)  | 0.85<br>(0.68,1.07)    | 1.06<br>(0.74,1.52)  | Sulfonylurea         | 1.07<br>(0.80,1.41)  | 0.94<br>(0.77,1.15)  | 1.01<br>(0.49,2.12)  | 0.32<br>(0.03,3.23)  | 1.14<br>(0.36,3.67)  | 0.18<br>(0.04,0.82)         | 0.27<br>(0.05,1.50)  | 0.93<br>(0.75,1.15)  | 0.89<br>(0.60,1.31)  |
| 0.76<br>(0.55,1.06)  | 0.80<br>(0.58,1.10)    | 0.99<br>(0.67,1.47)  | 0.94<br>(0.71,1.25)  | Thiazolidinedione    | 0.88<br>(0.65,1.20)  | 0.95<br>(0.45,2.03)  | 0.30<br>(0.03,3.06)  | 1.07<br>(0.33,3.50)  | 0.17<br>(0.04,0.78)         | 0.25<br>(0.04,1.44)  | 0.87<br>(0.64,1.19)  | 0.83<br>(0.61,1.14)  |
| 0.86<br>(0.75,0.99)  | 0.91<br>(0.80,1.02)    | 1.12<br>(0.78,1.61)  | 1.06<br>(0.87,1.30)  | 1.13<br>(0.83,1.53)  | DPP-4 inhibitor      | 1.08<br>(0.53,2.20)  | 0.34<br>(0.03,3.40)  | 1.21<br>(0.38,3.84)  | 0.19<br>(0.04,0.86)         | 0.28<br>(0.05,1.60)  | 0.99<br>(0.90,1.08)  | 0.94<br>(0.63,1.40)  |
| 0.80<br>(0.39,1.64)  | 0.84<br>(0.41,1.71)    | 1.04<br>(0.47,2.30)  | 0.99<br>(0.47,2.06)  | 1.05<br>(0.49,2.24)  | 0.93<br>(0.45,1.90)  | Basal insulin        | 0.32<br>(0.03,3.16)  | 1.13<br>(0.36,3.52)  | 0.18<br>(0.03,0.94)         | 0.26<br>(0.04,1.71)  | 0.92<br>(0.45,1.86)  | 0.87<br>(0.40,1.93)  |
| 2.52<br>(0.25,25.05) | 2.64<br>(0.27,26.22)   | 3.28<br>(0.32,33.50) | 3.10<br>(0.31,31.06) | 3.30<br>(0.33,33.38) | 2.92<br>(0.29,29.05) | 3.14<br>(0.32,31.18) | Basal bolus insulin  | 3.54<br>(0.29,43.75) | 0.56<br>(0.04,8.67)         | 0.82<br>(0.05,14.65) | 2.88<br>(0.29,28.60) | 2.75<br>(0.27,28.13) |
| 0.71<br>(0.22,2.25)  | 0.75<br>(0.24,2.35)    | 0.93<br>(0.28,3.08)  | 0.88<br>(0.27,2.81)  | 0.93<br>(0.29,3.04)  | 0.82<br>(0.26,2.61)  | 0.89<br>(0.28,2.77)  | 0.28<br>(0.02,3.49)  | Bolus insulin        | 0.16<br>(0.02,1.05)         | 0.23<br>(0.03,1.86)  | 0.81<br>(0.26,2.56)  | 0.78<br>(0.23,2.59)  |
| 4.53<br>(1.00,20.60) | 4.76<br>(1.05,21.61)   | 5.91<br>(1.25,27.86) | 5.58<br>(1.22,25.49) | 5.95<br>(1.28,27.67) | 5.26<br>(1.16,23.87) | 5.66<br>(1.07,30.03) | 1.80<br>(0.12,28.11) | 6.38<br>(0.96,42.54) | Alpha glucosidase inhibitor | 1.49<br>(0.16,13.97) | 5.19<br>(1.14,23.50) | 4.95<br>(1.04,23.53) |
| 3.05<br>(0.54,17.34) | 3.20<br>(0.56,18.19)   | 3.98<br>(0.68,23.22) | 3.76<br>(0.67,21.22) | 4.00<br>(0.70,23.05) | 3.54<br>(0.63,20.06) | 3.81<br>(0.59,24.79) | 1.21<br>(0.07,21.52) | 4.29<br>(0.54,34.35) | 0.67<br>(0.07,6.33)         | Glitinide            | 3.49<br>(0.62,19.78) | 3.33<br>(0.57,19.58) |
| 0.87<br>(0.79,0.97)  | 0.92<br>(0.85,0.99)    | 1.14<br>(0.79,1.64)  | 1.08<br>(0.87,1.33)  | 1.15<br>(0.84,1.56)  | 1.01<br>(0.92,1.11)  | 1.09<br>(0.54,2.22)  | 0.35<br>(0.03,3.45)  | 1.23<br>(0.39,3.88)  | 0.19<br>(0.04,0.87)         | 0.29<br>(0.05,1.62)  | Placebo              | 0.95<br>(0.64,1.42)  |
| 0.92<br>(0.61,1.38)  | 0.96<br>(0.64,1.44)    | 1.19<br>(0.74,1.92)  | 1.13<br>(0.76,1.67)  | 1.20<br>(0.88,1.64)  | 1.06<br>(0.71,1.58)  | 1.14<br>(0.52,2.52)  | 0.36<br>(0.04,3.72)  | 1.29<br>(0.39,4.30)  | 0.20<br>(0.04,0.96)         | 0.30<br>(0.05,1.76)  | 1.05<br>(0.70,1.56)  | Standard therapy     |



**Table 4 Nonfatal stroke**

The columns present the row drug class compared to the column drug class. The rows present the row drug class compared to the column drug class. The effect estimates are expressed as odds ratios and 95% confidence intervals. For example, the odds ratio for stroke with SGLT-2 inhibitors compared to GLP-1 receptor agonists is 1.20 (95% confidence interval 1.03 to 1.41). For the reverse, the effect of a GLP-1 receptor compared to SGLT-2 inhibitor on the odds of stroke is 0.83 (95% confidence interval 0.71 to 0.98).

|                      |                        |                      |                      |                      |                      |                      |                      |                      |                             |                      |                      |                      |
|----------------------|------------------------|----------------------|----------------------|----------------------|----------------------|----------------------|----------------------|----------------------|-----------------------------|----------------------|----------------------|----------------------|
| SGLT-2 inhibitor     | 0.83<br>(0.71,0.98)    | 0.99<br>(0.64,1.55)  | 1.08<br>(0.83,1.42)  | 0.93<br>(0.68,1.27)  | 0.92<br>(0.77,1.09)  | 0.83<br>(0.38,1.83)  | 0.61<br>(0.11,3.55)  | 0.84<br>(0.09,8.19)  | 9.95<br>(0.80,123.72)       | 1.84<br>(0.27,12.46) | 0.99<br>(0.87,1.12)  | 1.18<br>(0.75,1.84)  |
| 1.20<br>(1.03,1.41)  | GLP-1 receptor agonist | 1.20<br>(0.77,1.85)  | 1.30<br>(1.01,1.69)  | 1.12<br>(0.82,1.51)  | 1.10<br>(0.94,1.29)  | 1.00<br>(0.46,2.17)  | 0.74<br>(0.13,4.25)  | 1.01<br>(0.10,9.78)  | 11.96<br>(0.96,148.53)      | 2.21<br>(0.33,14.95) | 1.19<br>(1.08,1.31)  | 1.41<br>(0.91,2.19)  |
| 1.01<br>(0.65,1.56)  | 0.84<br>(0.54,1.29)    | Metformin            | 1.09<br>(0.72,1.64)  | 0.93<br>(0.60,1.45)  | 0.92<br>(0.60,1.41)  | 0.84<br>(0.35,2.02)  | 0.62<br>(0.10,3.72)  | 0.85<br>(0.08,8.53)  | 10.01<br>(0.79,126.77)      | 1.85<br>(0.27,12.85) | 1.00<br>(0.65,1.52)  | 1.18<br>(0.68,2.05)  |
| 0.92<br>(0.70,1.21)  | 0.77<br>(0.59,0.99)    | 0.92<br>(0.61,1.38)  | Sulfonylurea         | 0.86<br>(0.64,1.15)  | 0.85<br>(0.67,1.06)  | 0.77<br>(0.34,1.72)  | 0.57<br>(0.10,3.30)  | 0.78<br>(0.08,7.62)  | 9.18<br>(0.75,112.72)       | 1.70<br>(0.25,11.34) | 0.91<br>(0.72,1.16)  | 1.09<br>(0.70,1.68)  |
| 1.08<br>(0.79,1.47)  | 0.90<br>(0.66,1.21)    | 1.07<br>(0.69,1.66)  | 1.17<br>(0.87,1.57)  | Thiazolidinedione    | 0.99<br>(0.74,1.32)  | 0.90<br>(0.40,2.02)  | 0.66<br>(0.11,3.84)  | 0.91<br>(0.09,8.94)  | 10.72<br>(0.86,133.16)      | 1.98<br>(0.29,13.35) | 1.07<br>(0.80,1.42)  | 1.27<br>(0.90,1.79)  |
| 1.09<br>(0.92,1.30)  | 0.91<br>(0.77,1.06)    | 1.09<br>(0.71,1.66)  | 1.18<br>(0.94,1.48)  | 1.01<br>(0.76,1.36)  | DPP-4 inhibitor      | 0.91<br>(0.41,1.99)  | 0.67<br>(0.12,3.87)  | 0.92<br>(0.09,8.93)  | 10.86<br>(0.88,134.44)      | 2.01<br>(0.30,13.53) | 1.08<br>(0.95,1.23)  | 1.28<br>(0.83,1.98)  |
| 1.20<br>(0.55,2.64)  | 1.00<br>(0.46,2.17)    | 1.20<br>(0.50,2.88)  | 1.30<br>(0.58,2.93)  | 1.12<br>(0.49,2.52)  | 1.10<br>(0.50,2.42)  | Basal insulin        | 0.74<br>(0.13,4.24)  | 1.01<br>(0.09,11.13) | 11.97<br>(0.86,166.34)      | 2.21<br>(0.28,17.30) | 1.19<br>(0.55,2.59)  | 1.42<br>(0.59,3.37)  |
| 1.63<br>(0.28,9.41)  | 1.35<br>(0.24,7.78)    | 1.62<br>(0.27,9.74)  | 1.76<br>(0.30,10.27) | 1.51<br>(0.26,8.77)  | 1.49<br>(0.26,8.61)  | 1.35<br>(0.24,7.77)  | Basal bolus insulin  | 1.37<br>(0.08,24.04) | 16.20<br>(0.76,346.03)      | 2.99<br>(0.23,39.66) | 1.61<br>(0.28,9.27)  | 1.92<br>(0.32,11.43) |
| 1.19<br>(0.12,11.56) | 0.99<br>(0.10,9.56)    | 1.18<br>(0.12,11.92) | 1.29<br>(0.13,12.65) | 1.10<br>(0.11,10.90) | 1.09<br>(0.11,10.60) | 0.99<br>(0.09,10.87) | 0.73<br>(0.04,12.82) | Bolus insulin        | 11.83<br>(0.40,351.07)      | 2.19<br>(0.11,42.49) | 1.18<br>(0.12,11.41) | 1.40<br>(0.14,14.11) |
| 0.10<br>(0.01,1.25)  | 0.08<br>(0.01,1.04)    | 0.10<br>(0.01,1.27)  | 0.11<br>(0.01,1.34)  | 0.09<br>(0.01,1.16)  | 0.09<br>(0.01,1.14)  | 0.08<br>(0.01,1.16)  | 0.06<br>(0.00,1.32)  | 0.08<br>(0.00,2.51)  | Alpha glucosidase inhibitor | 0.18<br>(0.02,2.27)  | 0.10<br>(0.01,1.23)  | 0.12<br>(0.01,1.49)  |
| 0.54<br>(0.08,3.68)  | 0.45<br>(0.07,3.06)    | 0.54<br>(0.08,3.75)  | 0.59<br>(0.09,3.94)  | 0.50<br>(0.07,3.40)  | 0.50<br>(0.07,3.36)  | 0.45<br>(0.06,3.53)  | 0.33<br>(0.03,4.42)  | 0.46<br>(0.02,8.89)  | 5.41<br>(0.44,66.42)        | Glitinide            | 0.54<br>(0.08,3.63)  | 0.64<br>(0.09,4.34)  |
| 1.01<br>(0.89,1.14)  | 0.84<br>(0.76,0.93)    | 1.00<br>(0.66,1.54)  | 1.09<br>(0.86,1.40)  | 0.94<br>(0.70,1.25)  | 0.93<br>(0.82,1.05)  | 0.84<br>(0.39,1.83)  | 0.62<br>(0.11,3.57)  | 0.85<br>(0.09,8.24)  | 10.05<br>(0.81,124.59)      | 1.86<br>(0.28,12.54) | Placebo              | 1.19<br>(0.77,1.83)  |
| 0.85<br>(0.54,1.33)  | 0.71<br>(0.46,1.10)    | 0.85<br>(0.49,1.46)  | 0.92<br>(0.59,1.43)  | 0.79<br>(0.56,1.11)  | 0.78<br>(0.51,1.20)  | 0.71<br>(0.30,1.68)  | 0.52<br>(0.09,3.12)  | 0.71<br>(0.07,7.21)  | 8.46<br>(0.67,106.45)       | 1.56<br>(0.23,10.61) | 0.84<br>(0.55,1.29)  | Standard therapy     |

**Table 5 Kidney failure**

The columns present the row drug class compared to the column drug class. The rows present the row drug class compared to the column drug class. The effect estimates are expressed as odds ratios and 95% confidence intervals. For example, the odds ratio for kidney failure with SGLT-2 inhibitors compared to GLP-1 receptor agonists is 0.91 (95% confidence interval 0.69 to 1.20). For the reverse, the effect of a GLP-1 receptor compared to SGLT-2 inhibitor on the odds of kidney failure is 1.10 (95% confidence interval 0.83 to 1.45).

|                        |                        |                      |                        |                       |                        |                        |                         |                        |
|------------------------|------------------------|----------------------|------------------------|-----------------------|------------------------|------------------------|-------------------------|------------------------|
| SGLT-2 inhibitor       | 1.10<br>(0.83,1.45)    | 0.09<br>(0.01,1.60)  | 1.15<br>(0.26,5.08)    | 0.39<br>(0.03,5.83)   | 1.35<br>(0.95,1.92)    | 1.08<br>(0.19,6.09)    | 3.35<br>(0.13,83.65)    | 1.40<br>(1.12,1.75)    |
| 0.91<br>(0.69,1.20)    | GLP-1 receptor agonist | 0.09<br>(0.00,1.48)  | 1.05<br>(0.24,4.65)    | 0.35<br>(0.02,5.33)   | 1.23<br>(0.90,1.68)    | 0.98<br>(0.18,5.42)    | 3.05<br>(0.12,75.27)    | 1.27<br>(1.08,1.50)    |
| 10.69<br>(0.62,183.08) | 11.74<br>(0.68,203.78) | Metformin            | 12.35<br>(0.50,303.82) | 4.16<br>(0.08,210.50) | 14.41<br>(0.82,252.10) | 11.56<br>(0.42,321.33) | 35.86<br>(0.49,2619.65) | 14.97<br>(0.87,258.59) |
| 0.87<br>(0.20,3.81)    | 0.95<br>(0.22,4.21)    | 0.08<br>(0.00,1.99)  | Sulfonylurea           | 0.34<br>(0.03,3.25)   | 1.17<br>(0.27,5.10)    | 0.94<br>(0.10,9.00)    | 2.90<br>(0.08,99.39)    | 1.21<br>(0.28,5.32)    |
| 2.57<br>(0.17,38.50)   | 2.82<br>(0.19,42.41)   | 0.24<br>(0.00,12.15) | 2.97<br>(0.31,28.60)   | Thiazolidinedione     | 3.46<br>(0.23,51.68)   | 2.78<br>(0.11,68.31)   | 8.62<br>(0.13,572.91)   | 3.60<br>(0.24,53.82)   |
| 0.74<br>(0.52,1.06)    | 0.82<br>(0.60,1.12)    | 0.07<br>(0.00,1.21)  | 0.86<br>(0.20,3.74)    | 0.29<br>(0.02,4.31)   | DPP-4 inhibitor        | 0.80<br>(0.14,4.55)    | 2.49<br>(0.10,62.30)    | 1.04<br>(0.79,1.36)    |
| 0.93<br>(0.16,5.21)    | 1.02<br>(0.18,5.60)    | 0.09<br>(0.00,2.40)  | 1.07<br>(0.11,10.27)   | 0.36<br>(0.01,8.85)   | 1.25<br>(0.22,7.07)    | Basal insulin          | 3.10<br>(0.08,117.07)   | 1.30<br>(0.23,7.19)    |
| 0.30<br>(0.01,7.44)    | 0.33<br>(0.01,8.07)    | 0.03<br>(0.00,2.04)  | 0.34<br>(0.01,11.78)   | 0.12<br>(0.00,7.72)   | 0.40<br>(0.02,10.06)   | 0.32<br>(0.01,12.17)   | Bolus insulin           | 0.42<br>(0.02,10.34)   |
| 0.71<br>(0.57,0.89)    | 0.78<br>(0.67,0.92)    | 0.07<br>(0.00,1.15)  | 0.82<br>(0.19,3.62)    | 0.28<br>(0.02,4.16)   | 0.96<br>(0.73,1.26)    | 0.77<br>(0.14,4.29)    | 2.40<br>(0.10,59.29)    | Placebo                |

**Table 6 Hospitalisation for heart failure**

The columns present the row drug class compared to the column drug class. The rows present the row drug class compared to the column drug class. The effect estimates are expressed as odds ratios and 95% confidence intervals. For example, the odds ratio for heart failure with SGLT-2 inhibitors compared to GLP-1 receptor agonists is 0.74 (95% confidence interval 0.65 to 0.85). For the reverse, the effect of a GLP-1 receptor compared to SGLT-2 inhibitor on the odds of heart failure is 1.10 (95% confidence interval 0.83 to 1.45).

|                      |                        |                      |                      |                       |                      |                      |                      |                             |                      |                      |
|----------------------|------------------------|----------------------|----------------------|-----------------------|----------------------|----------------------|----------------------|-----------------------------|----------------------|----------------------|
| SGLT-2 inhibitor     | 1.34<br>(1.17,1.54)    | 1.71<br>(1.06,2.75)  | 1.28<br>(1.00,1.63)  | 2.22<br>(1.82,2.71)   | 1.51<br>(1.31,1.74)  | 1.14<br>(0.52,2.48)  | 0.45<br>(0.02,11.13) | 4.66<br>(0.18,118.31)       | 1.43<br>(1.30,1.58)  | 1.21<br>(0.78,1.87)  |
| 0.74<br>(0.65,0.85)  | GLP-1 receptor agonist | 1.27<br>(0.79,2.05)  | 0.95<br>(0.75,1.21)  | 1.66<br>(1.36,2.01)   | 1.12<br>(0.98,1.29)  | 0.85<br>(0.39,1.84)  | 0.34<br>(0.01,8.27)  | 3.47<br>(0.14,88.13)        | 1.07<br>(0.97,1.17)  | 0.90<br>(0.59,1.39)  |
| 0.58<br>(0.36,0.94)  | 0.78<br>(0.49,1.26)    | Metformin            | 0.75<br>(0.47,1.19)  | 1.30<br>(0.82,2.05)   | 0.88<br>(0.55,1.41)  | 0.67<br>(0.27,1.63)  | 0.26<br>(0.01,6.72)  | 2.72<br>(0.10,71.40)        | 0.84<br>(0.53,1.33)  | 0.71<br>(0.39,1.29)  |
| 0.78<br>(0.62,1.00)  | 1.05<br>(0.83,1.34)    | 1.34<br>(0.84,2.13)  | Sulfonylurea         | 1.74<br>(1.38,2.20)   | 1.18<br>(0.95,1.47)  | 0.89<br>(0.40,1.98)  | 0.35<br>(0.01,8.78)  | 3.65<br>(0.14,93.28)        | 1.12<br>(0.90,1.40)  | 0.95<br>(0.60,1.50)  |
| 0.45<br>(0.37,0.55)  | 0.60<br>(0.50,0.73)    | 0.77<br>(0.49,1.22)  | 0.57<br>(0.45,0.73)  | Thiazolidinedione     | 0.68<br>(0.56,0.82)  | 0.51<br>(0.24,1.11)  | 0.20<br>(0.01,5.02)  | 2.10<br>(0.08,53.41)        | 0.64<br>(0.54,0.77)  | 0.55<br>(0.37,0.81)  |
| 0.66<br>(0.57,0.77)  | 0.89<br>(0.77,1.03)    | 1.13<br>(0.71,1.81)  | 0.85<br>(0.68,1.05)  | 1.47<br>(1.21,1.79)   | DPP-4 inhibitor      | 0.75<br>(0.35,1.65)  | 0.30<br>(0.01,7.38)  | 3.09<br>(0.12,78.45)        | 0.95<br>(0.85,1.05)  | 0.80<br>(0.52,1.24)  |
| 0.88<br>(0.40,1.92)  | 1.18<br>(0.54,2.55)    | 1.50<br>(0.62,3.67)  | 1.12<br>(0.50,2.49)  | 1.95<br>(0.90,4.24)   | 1.33<br>(0.61,2.89)  | Basal insulin        | 0.40<br>(0.01,10.69) | 4.09<br>(0.15,113.70)       | 1.26<br>(0.58,2.73)  | 1.06<br>(0.48,2.34)  |
| 2.22<br>(0.09,54.91) | 2.98<br>(0.12,73.48)   | 3.80<br>(0.15,96.96) | 2.83<br>(0.11,70.49) | 4.93<br>(0.20,122.37) | 3.35<br>(0.14,82.84) | 2.53<br>(0.09,68.30) | Bolus insulin        | 10.34<br>(0.11,982.25)      | 3.18<br>(0.13,78.49) | 2.69<br>(0.11,68.25) |
| 0.21<br>(0.01,5.45)  | 0.29<br>(0.01,7.32)    | 0.37<br>(0.01,9.63)  | 0.27<br>(0.01,7.00)  | 0.48<br>(0.02,12.16)  | 0.32<br>(0.01,8.23)  | 0.24<br>(0.01,6.79)  | 0.10<br>(0.00,9.18)  | Alpha glucosidase inhibitor | 0.31<br>(0.01,7.80)  | 0.26<br>(0.01,6.78)  |
| 0.70<br>(0.63,0.77)  | 0.94<br>(0.85,1.03)    | 1.19<br>(0.75,1.90)  | 0.89<br>(0.71,1.11)  | 1.55<br>(1.31,1.84)   | 1.05<br>(0.95,1.17)  | 0.79<br>(0.37,1.72)  | 0.31<br>(0.01,7.76)  | 3.25<br>(0.13,82.52)        | Placebo              | 0.85<br>(0.55,1.29)  |
| 0.83<br>(0.53,1.28)  | 1.11<br>(0.72,1.71)    | 1.41<br>(0.77,2.58)  | 1.05<br>(0.67,1.66)  | 1.83<br>(1.23,2.73)   | 1.25<br>(0.81,1.92)  | 0.94<br>(0.43,2.07)  | 0.37<br>(0.01,9.43)  | 3.85<br>(0.15,100.27)       | 1.18<br>(0.77,1.81)  | Standard therapy     |

**Table 7 Severe hypoglycaemia**

The columns present the row drug class compared to the column drug class. The rows present the row drug class compared to the column drug class. The effect estimates are expressed as odds ratios and 95% confidence intervals. For example, the odds ratio for severe hypoglycaemia with SGLT-2 inhibitors compared to GLP-1 receptor agonists is 0.98 (95% confidence interval 0.73 to 1.31). For the reverse, the effect of a GLP-1 receptor compared to SGLT-2 inhibitor on the odds of severe hypoglycaemia is 1.02 (95% confidence interval 0.76 to 1.36).

|                     |                        |                      |                      |                      |                     |                      |                      |                      |                             |                      |                     |                     |
|---------------------|------------------------|----------------------|----------------------|----------------------|---------------------|----------------------|----------------------|----------------------|-----------------------------|----------------------|---------------------|---------------------|
| SGLT-2 inhibitor    | 1.02<br>(0.76,1.36)    | 1.82<br>(0.88,3.74)  | 6.84<br>(4.34,10.79) | 1.49<br>(0.92,2.44)  | 1.21<br>(0.90,1.61) | 2.56<br>(1.66,3.94)  | 2.58<br>(0.15,43.94) | 2.96<br>(0.56,15.78) | 1.24<br>(0.24,6.35)         | 3.49<br>(0.99,12.37) | 1.11<br>(0.86,1.43) | 1.08<br>(0.66,1.79) |
| 0.98<br>(0.73,1.31) | GLP-1 receptor agonist | 1.78<br>(0.87,3.64)  | 6.70<br>(4.38,10.25) | 1.46<br>(0.96,2.23)  | 1.18<br>(0.97,1.44) | 2.51<br>(1.81,3.48)  | 2.52<br>(0.15,42.42) | 2.90<br>(0.56,15.06) | 1.22<br>(0.24,6.15)         | 3.42<br>(0.97,12.03) | 1.08<br>(0.93,1.27) | 1.06<br>(0.71,1.58) |
| 0.55<br>(0.27,1.13) | 0.56<br>(0.28,1.15)    | Metformin            | 3.77<br>(1.74,8.15)  | 0.82<br>(0.37,1.85)  | 0.66<br>(0.33,1.35) | 1.41<br>(0.64,3.09)  | 1.42<br>(0.08,26.08) | 1.63<br>(0.27,9.84)  | 0.69<br>(0.12,3.91)         | 1.92<br>(0.61,6.07)  | 0.61<br>(0.30,1.23) | 0.60<br>(0.26,1.35) |
| 0.15<br>(0.09,0.23) | 0.15<br>(0.10,0.23)    | 0.27<br>(0.12,0.57)  | Sulfonylurea         | 0.22<br>(0.13,0.37)  | 0.18<br>(0.12,0.26) | 0.37<br>(0.22,0.64)  | 0.38<br>(0.02,6.53)  | 0.43<br>(0.08,2.37)  | 0.18<br>(0.04,0.94)         | 0.51<br>(0.14,1.81)  | 0.16<br>(0.11,0.24) | 0.16<br>(0.09,0.28) |
| 0.67<br>(0.41,1.09) | 0.68<br>(0.45,1.04)    | 1.21<br>(0.54,2.73)  | 4.58<br>(2.68,7.81)  | Thiazolidinedione    | 0.81<br>(0.53,1.24) | 1.71<br>(1.03,2.85)  | 1.72<br>(0.10,29.77) | 1.98<br>(0.36,10.86) | 0.83<br>(0.16,4.39)         | 2.34<br>(0.63,8.65)  | 0.74<br>(0.49,1.13) | 0.72<br>(0.43,1.21) |
| 0.83<br>(0.62,1.11) | 0.85<br>(0.69,1.04)    | 1.51<br>(0.74,3.07)  | 5.68<br>(3.82,8.44)  | 1.24<br>(0.81,1.90)  | DPP-4 inhibitor     | 2.12<br>(1.45,3.10)  | 2.14<br>(0.13,36.18) | 2.46<br>(0.47,12.92) | 1.03<br>(0.20,5.20)         | 2.90<br>(0.83,10.15) | 0.92<br>(0.79,1.07) | 0.90<br>(0.58,1.38) |
| 0.39<br>(0.25,0.60) | 0.40<br>(0.29,0.55)    | 0.71<br>(0.32,1.55)  | 2.67<br>(1.57,4.54)  | 0.58<br>(0.35,0.97)  | 0.47<br>(0.32,0.69) | Basal insulin        | 1.01<br>(0.06,16.60) | 1.16<br>(0.22,6.21)  | 0.49<br>(0.09,2.53)         | 1.36<br>(0.37,5.00)  | 0.43<br>(0.30,0.62) | 0.42<br>(0.25,0.70) |
| 0.39<br>(0.02,6.62) | 0.40<br>(0.02,6.67)    | 0.70<br>(0.04,12.94) | 2.66<br>(0.15,46.04) | 0.58<br>(0.03,10.02) | 0.47<br>(0.03,7.91) | 0.99<br>(0.06,16.39) | Basal bolus insulin  | 1.15<br>(0.04,30.19) | 0.48<br>(0.02,12.49)        | 1.36<br>(0.06,29.76) | 0.43<br>(0.03,7.26) | 0.42<br>(0.02,7.26) |
| 0.34<br>(0.06,1.80) | 0.34<br>(0.07,1.79)    | 0.61<br>(0.10,3.69)  | 2.31<br>(0.42,12.65) | 0.50<br>(0.09,2.76)  | 0.41<br>(0.08,2.14) | 0.86<br>(0.16,4.63)  | 0.87<br>(0.03,22.82) | Bolus insulin        | 0.42<br>(0.04,4.23)         | 1.18<br>(0.15,9.36)  | 0.37<br>(0.07,1.95) | 0.37<br>(0.07,1.99) |
| 0.80<br>(0.16,4.11) | 0.82<br>(0.16,4.15)    | 1.46<br>(0.26,8.33)  | 5.50<br>(1.07,28.41) | 1.20<br>(0.23,6.34)  | 0.97<br>(0.19,4.89) | 2.06<br>(0.39,10.74) | 2.07<br>(0.08,53.63) | 2.38<br>(0.24,24.01) | Alpha glucosidase inhibitor | 2.81<br>(0.39,20.39) | 0.89<br>(0.18,4.47) | 0.87<br>(0.16,4.61) |
| 0.29<br>(0.08,1.01) | 0.29<br>(0.08,1.03)    | 0.52<br>(0.16,1.64)  | 1.96<br>(0.55,6.95)  | 0.43<br>(0.12,1.58)  | 0.35<br>(0.10,1.21) | 0.73<br>(0.20,2.69)  | 0.74<br>(0.03,16.20) | 0.85<br>(0.11,6.74)  | 0.36<br>(0.05,2.58)         | Glitinide            | 0.32<br>(0.09,1.11) | 0.31<br>(0.08,1.16) |
| 0.90<br>(0.70,1.16) | 0.92<br>(0.79,1.08)    | 1.64<br>(0.81,3.30)  | 6.18<br>(4.11,9.29)  | 1.35<br>(0.89,2.05)  | 1.09<br>(0.93,1.27) | 2.31<br>(1.62,3.30)  | 2.33<br>(0.14,39.25) | 2.67<br>(0.51,13.99) | 1.12<br>(0.22,5.63)         | 3.15<br>(0.90,11.01) | Placebo             | 0.98<br>(0.64,1.49) |
| 0.92<br>(0.56,1.53) | 0.94<br>(0.63,1.41)    | 1.68<br>(0.74,3.80)  | 6.32<br>(3.59,11.13) | 1.38<br>(0.83,2.30)  | 1.11<br>(0.72,1.71) | 2.36<br>(1.42,3.94)  | 2.38<br>(0.14,41.09) | 2.74<br>(0.50,14.91) | 1.15<br>(0.22,6.08)         | 3.22<br>(0.86,12.03) | 1.02<br>(0.67,1.56) | Standard therapy    |

**Table 8 Blindness**

The columns present the row drug class compared to the column drug class. The rows present the row drug class compared to the column drug class. The effect estimates are expressed as odds ratios and 95% confidence intervals. For example, the odds ratio for blindness with SGLT-2 inhibitors compared to GLP-1 receptor agonists is 0.17 (95% confidence interval 0.00 to 5.64). For the reverse, the effect of a GLP-1 receptor compared to SGLT-2 inhibitor on the odds of blindness is 6.04 (95% confidence interval 0.18 to 205.45).

|                     |                        |                       |                       |
|---------------------|------------------------|-----------------------|-----------------------|
| SGLT-2 inhibitor    | 6.04<br>(0.18,205.45)  | 5.99<br>(0.23,154.28) | 6.03<br>(0.25,148.05) |
| 0.17<br>(0.00,5.64) | GLP-1 receptor agonist | 0.99<br>(0.20,4.83)   | 1.00<br>(0.23,4.39)   |
| 0.17<br>(0.01,4.30) | 1.01<br>(0.21,4.90)    | DPP-4 inhibitor       | 1.01<br>(0.58,1.75)   |
| 0.17<br>(0.01,4.07) | 1.00<br>(0.23,4.41)    | 0.99<br>(0.57,1.73)   | Placebo               |

**Table 9 Health-related quality of life**

The columns present the row drug class compared to the column drug class. The rows present the row drug class compared to the column drug class. The effect estimates are expressed as standardised mean difference and 95% confidence interval. For example, the standardised mean difference in health-related quality of life for SGLT-2 inhibitor therapy compared to GLP-1 receptor agonist therapy is 0.01 (95% confidence interval -0.19 to 0.20). The standardised mean difference in health-related quality of life for GLP1 receptor agonist therapy is the inverse (0.01 (95% confidence interval -0.20 to 0.19)).

|                       |                        |                       |                      |                       |                       |                       |                        |                             |                       |                        |                        |
|-----------------------|------------------------|-----------------------|----------------------|-----------------------|-----------------------|-----------------------|------------------------|-----------------------------|-----------------------|------------------------|------------------------|
| SGLT-2 inhibitor      | -0.01<br>(-0.20,0.19)  | -0.13<br>(-0.45,0.19) | 0.11<br>(-0.35,0.57) | 0.03<br>(-0.31,0.37)  | -0.11<br>(-0.35,0.13) | 0.03<br>(-0.30,0.35)  | -0.35<br>(-0.63,-0.06) | -0.11<br>(-0.49,0.26)       | -0.01<br>(-0.45,0.44) | -0.14<br>(-0.36,0.08)  | -0.46<br>(-0.75,-0.16) |
| 0.01<br>(-0.19,0.20)  | GLP-1 receptor agonist | -0.12<br>(-0.37,0.12) | 0.12<br>(-0.30,0.54) | 0.04<br>(-0.24,0.32)  | -0.11<br>(-0.25,0.03) | 0.03<br>(-0.23,0.29)  | -0.34<br>(-0.55,-0.13) | -0.11<br>(-0.43,0.21)       | 0.00<br>(-0.40,0.40)  | -0.13<br>(-0.23,-0.03) | -0.45<br>(-0.67,-0.23) |
| 0.13<br>(-0.19,0.45)  | 0.12<br>(-0.12,0.37)   | Metformin             | 0.24<br>(-0.25,0.73) | 0.16<br>(-0.14,0.46)  | 0.02<br>(-0.23,0.26)  | 0.16<br>(-0.20,0.52)  | -0.21<br>(-0.54,0.11)  | 0.02<br>(-0.36,0.40)        | 0.13<br>(-0.29,0.54)  | -0.01<br>(-0.28,0.26)  | -0.33<br>(-0.64,-0.01) |
| -0.11<br>(-0.57,0.35) | -0.12<br>(-0.54,0.30)  | -0.24<br>(-0.73,0.25) | Sulfonylurea         | -0.08<br>(-0.58,0.43) | -0.22<br>(-0.67,0.22) | -0.08<br>(-0.58,0.41) | -0.46<br>(-0.92,0.01)  | -0.22<br>(-0.75,0.30)       | -0.12<br>(-0.69,0.46) | -0.25<br>(-0.66,0.16)  | -0.57<br>(-1.04,-0.09) |
| -0.03<br>(-0.37,0.31) | -0.04<br>(-0.32,0.24)  | -0.16<br>(-0.46,0.14) | 0.08<br>(-0.43,0.58) | Thiazolidinedione     | -0.15<br>(-0.43,0.14) | -0.01<br>(-0.39,0.38) | -0.38<br>(-0.73,-0.03) | -0.15<br>(-0.55,0.26)       | -0.04<br>(-0.32,0.25) | -0.17<br>(-0.47,0.13)  | -0.49<br>(-0.83,-0.15) |
| 0.11<br>(-0.13,0.35)  | 0.11<br>(-0.03,0.25)   | -0.02<br>(-0.26,0.23) | 0.22<br>(-0.22,0.67) | 0.15<br>(-0.14,0.43)  | DPP-4 inhibitor       | 0.14<br>(-0.16,0.44)  | -0.23<br>(-0.48,0.02)  | -0.00<br>(-0.29,0.29)       | 0.11<br>(-0.29,0.51)  | -0.02<br>(-0.19,0.14)  | -0.34<br>(-0.56,-0.13) |
| -0.03<br>(-0.35,0.30) | -0.03<br>(-0.29,0.23)  | -0.16<br>(-0.52,0.20) | 0.08<br>(-0.41,0.58) | 0.01<br>(-0.38,0.39)  | -0.14<br>(-0.44,0.16) | Basal insulin         | -0.37<br>(-0.62,-0.13) | -0.14<br>(-0.55,0.27)       | -0.03<br>(-0.51,0.45) | -0.16<br>(-0.44,0.11)  | -0.48<br>(-0.82,-0.14) |
| 0.35<br>(0.06,0.63)   | 0.34<br>(0.13,0.55)    | 0.21<br>(-0.11,0.54)  | 0.46<br>(-0.01,0.92) | 0.38<br>(0.03,0.73)   | 0.23<br>(-0.02,0.48)  | 0.37<br>(0.13,0.62)   | Bolus insulin          | 0.23<br>(-0.15,0.61)        | 0.34<br>(-0.11,0.79)  | 0.21<br>(-0.02,0.44)   | -0.11<br>(-0.41,0.19)  |
| 0.11<br>(-0.26,0.49)  | 0.11<br>(-0.21,0.43)   | -0.02<br>(-0.40,0.36) | 0.22<br>(-0.30,0.75) | 0.15<br>(-0.26,0.55)  | 0.00<br>(-0.29,0.29)  | 0.14<br>(-0.27,0.55)  | -0.23<br>(-0.61,0.15)  | Alpha glucosidase inhibitor | 0.11<br>(-0.38,0.60)  | -0.02<br>(-0.36,0.31)  | -0.34<br>(-0.70,0.02)  |
| 0.01<br>(-0.44,0.45)  | -0.00<br>(-0.40,0.40)  | -0.13<br>(-0.54,0.29) | 0.12<br>(-0.46,0.69) | 0.04<br>(-0.25,0.32)  | -0.11<br>(-0.51,0.29) | 0.03<br>(-0.45,0.51)  | -0.34<br>(-0.79,0.11)  | -0.11<br>(-0.60,0.38)       | Glitinide             | -0.13<br>(-0.54,0.28)  | -0.45<br>(-0.90,-0.01) |
| 0.14<br>(-0.08,0.36)  | 0.13<br>(0.03,0.23)    | 0.01<br>(-0.26,0.28)  | 0.25<br>(-0.16,0.66) | 0.17<br>(-0.13,0.47)  | 0.02<br>(-0.14,0.19)  | 0.16<br>(-0.11,0.44)  | -0.21<br>(-0.44,0.02)  | 0.02<br>(-0.31,0.36)        | 0.13<br>(-0.28,0.54)  | Placebo                | -0.32<br>(-0.56,-0.08) |
| 0.46<br>(0.16,0.75)   | 0.45<br>(0.23,0.67)    | 0.33<br>(0.01,0.64)   | 0.57<br>(0.09,1.04)  | 0.49<br>(0.15,0.83)   | 0.34<br>(0.13,0.56)   | 0.48<br>(0.14,0.82)   | 0.11<br>(-0.19,0.41)   | 0.34<br>(-0.02,0.70)        | 0.45<br>(0.01,0.90)   | 0.32<br>(0.08,0.56)    | Standard therapy       |

**Table 10 Body weight**

The columns present the row drug class compared to the column drug class. The rows present the row drug class compared to the column drug class. The effect estimates are expressed as mean difference and 95% confidence interval. For example, the mean difference in body weight for SGLT-2 inhibitor therapy compared to GLP-1 receptor agonist therapy is 0.47 kg (95% confidence interval -0.85 kg to -0.09 kg). The standardised mean difference in body weight for GLP1 receptor agonist therapy compared to SGLT-2 inhibitor therapy is the inverse (0.47 kg (95% confidence interval 0.09 to 0.85 kg)).

|                        |                        |                        |                        |                      |                        |                        |                       |                        |                             |                        |                        |                        |
|------------------------|------------------------|------------------------|------------------------|----------------------|------------------------|------------------------|-----------------------|------------------------|-----------------------------|------------------------|------------------------|------------------------|
| SGLT-2 inhibitor       | 0.47<br>(0.09,0.85)    | 1.17<br>(0.69,1.66)    | 3.63<br>(3.20,4.06)    | 4.52<br>(4.10,4.95)  | 2.25<br>(1.90,2.61)    | 3.92<br>(3.35,4.49)    | 4.18<br>(2.97,5.39)   | 2.74<br>(1.20,4.27)    | 1.61<br>(1.00,2.22)         | 3.00<br>(2.12,3.89)    | 1.92<br>(1.62,2.23)    | 2.59<br>(2.03,3.16)    |
| -0.47<br>(-0.85,-0.09) | GLP-1 receptor agonist | 0.70<br>(0.24,1.17)    | 3.16<br>(2.75,3.57)    | 4.05<br>(3.66,4.44)  | 1.78<br>(1.47,2.09)    | 3.45<br>(2.98,3.92)    | 3.71<br>(2.54,4.88)   | 2.27<br>(0.77,3.76)    | 1.14<br>(0.55,1.73)         | 2.53<br>(1.66,3.40)    | 1.45<br>(1.18,1.72)    | 2.12<br>(1.62,2.63)    |
| -1.17<br>(-1.66,-0.69) | -0.70<br>(-1.17,-0.24) | Metformin              | 2.46<br>(1.97,2.95)    | 3.35<br>(2.88,3.82)  | 1.08<br>(0.64,1.51)    | 2.75<br>(2.12,3.38)    | 3.01<br>(1.78,4.24)   | 1.56<br>(0.01,3.12)    | 0.44<br>(-0.20,1.08)        | 1.83<br>(0.93,2.73)    | 0.75<br>(0.32,1.18)    | 1.42<br>(0.82,2.02)    |
| -3.63<br>(-4.06,-3.20) | -3.16<br>(-3.57,-2.75) | -2.46<br>(-2.95,-1.97) | Sulfonylurea           | 0.89<br>(0.50,1.29)  | -1.38<br>(-1.75,-1.00) | 0.29<br>(-0.29,0.88)   | 0.55<br>(-0.65,1.75)  | -0.89<br>(-2.43,0.65)  | -2.02<br>(-2.64,-1.40)      | -0.63<br>(-1.47,0.21)  | -1.71<br>(-2.08,-1.33) | -1.03<br>(-1.61,-0.46) |
| -4.52<br>(-4.95,-4.10) | -4.05<br>(-4.44,-3.66) | -3.35<br>(-3.82,-2.88) | -0.89<br>(-1.29,-0.50) | Thiazolidinedione    | -2.27<br>(-2.64,-1.91) | -0.60<br>(-1.17,-0.03) | -0.34<br>(-1.54,0.85) | -1.79<br>(-3.32,-0.25) | -2.91<br>(-3.51,-2.31)      | -1.52<br>(-2.38,-0.66) | -2.60<br>(-2.94,-2.26) | -1.93<br>(-2.49,-1.37) |
| -2.25<br>(-2.61,-1.90) | -1.78<br>(-2.09,-1.47) | -1.08<br>(-1.51,-0.64) | 1.38<br>(1.00,1.75)    | 2.27<br>(1.91,2.64)  | DPP-4 inhibitor        | 1.67<br>(1.15,2.19)    | 1.93<br>(0.74,3.12)   | 0.49<br>(-1.03,2.01)   | -0.64<br>(-1.20,-0.08)      | 0.75<br>(-0.11,1.61)   | -0.33<br>(-0.57,-0.08) | 0.34<br>(-0.16,0.85)   |
| -3.92<br>(-4.49,-3.35) | -3.45<br>(-3.92,-2.98) | -2.75<br>(-3.38,-2.12) | -0.29<br>(-0.88,0.29)  | 0.60<br>(0.03,1.17)  | -1.67<br>(-2.19,-1.15) | Basal insulin          | 0.26<br>(-0.92,1.44)  | -1.19<br>(-2.75,0.38)  | -2.31<br>(-3.03,-1.59)      | -0.92<br>(-1.88,0.04)  | -2.00<br>(-2.51,-1.50) | -1.33<br>(-1.94,-0.71) |
| -4.18<br>(-5.39,-2.97) | -3.71<br>(-4.88,-2.54) | -3.01<br>(-4.24,-1.78) | -0.55<br>(-1.75,0.65)  | 0.34<br>(-0.85,1.54) | -1.93<br>(-3.12,-0.74) | -0.26<br>(-1.44,0.92)  | Basal bolus insulin   | -1.44<br>(-3.34,0.45)  | -2.57<br>(-3.85,-1.28)      | -1.18<br>(-2.61,0.25)  | -2.26<br>(-3.44,-1.08) | -1.59<br>(-2.83,-0.34) |
| -2.74<br>(-4.27,-1.20) | -2.27<br>(-3.76,-0.77) | -1.56<br>(-3.12,-0.01) | 0.89<br>(-0.65,2.43)   | 1.79<br>(0.25,3.32)  | -0.49<br>(-2.01,1.03)  | 1.19<br>(-0.38,2.75)   | 1.44<br>(-0.45,3.34)  | Bolus insulin          | -1.12<br>(-2.73,0.48)       | 0.26<br>(-1.46,1.98)   | -0.82<br>(-2.33,0.70)  | -0.14<br>(-1.72,1.43)  |
| -1.61<br>(-2.22,-1.00) | -1.14<br>(-1.73,-0.55) | -0.44<br>(-1.08,0.20)  | 2.02<br>(1.40,2.64)    | 2.91<br>(2.31,3.51)  | 0.64<br>(0.08,1.20)    | 2.31<br>(1.59,3.03)    | 2.57<br>(1.28,3.85)   | 1.12<br>(-0.48,2.73)   | Alpha glucosidase inhibitor | 1.39<br>(0.40,2.38)    | 0.31<br>(-0.23,0.85)   | 0.98<br>(0.27,1.69)    |
| -3.00<br>(-3.89,-2.12) | -2.53<br>(-3.40,-1.66) | -1.83<br>(-2.73,-0.93) | 0.63<br>(-0.21,1.47)   | 1.52<br>(0.66,2.38)  | -0.75<br>(-1.61,0.11)  | 0.92<br>(-0.04,1.88)   | 1.18<br>(-0.25,2.61)  | -0.26<br>(-1.98,1.46)  | -1.39<br>(-2.38,-0.40)      | Glitinide              | -1.08<br>(-1.93,-0.23) | -0.41<br>(-1.33,0.52)  |
| -1.92<br>(-2.23,-1.62) | -1.45<br>(-1.72,-1.18) | -0.75<br>(-1.18,-0.32) | 1.71<br>(1.33,2.08)    | 2.60<br>(2.26,2.94)  | 0.33<br>(0.08,0.57)    | 2.00<br>(1.50,2.51)    | 2.26<br>(1.08,3.44)   | 0.82<br>(-0.70,2.33)   | -0.31<br>(-0.85,0.23)       | 1.08<br>(0.23,1.93)    | Placebo                | 0.67<br>(0.16,1.18)    |
| -2.59<br>(-3.16,-2.03) | -2.12<br>(-2.63,-1.62) | -1.42<br>(-2.02,-0.82) | 1.03<br>(0.46,1.61)    | 1.93<br>(1.37,2.49)  | -0.34<br>(-0.85,0.16)  | 1.33<br>(0.71,1.94)    | 1.59<br>(0.34,2.83)   | 0.14<br>(-1.43,1.72)   | -0.98<br>(-1.69,-0.27)      | 0.41<br>(-0.52,1.33)   | -0.67<br>(-1.18,-0.16) | Standard therapy       |

**Table 11 Amputation**

The columns present the row drug class compared to the column drug class. The rows present the row drug class compared to the column drug class. The effect estimates are expressed as odds ratios and 95% confidence intervals. For example, the odds ratio for amputation with SGLT-2 inhibitors compared to GLP-1 receptor agonists is 3.43 (95% confidence interval 0.14 to 84.49). For the reverse, the effect of a GLP-1 receptor compared to SGLT-2 inhibitor on the odds of amputation is 0.29 (95% confidence interval 0.01 to 7.19).

|                      |                        |                      |                      |                      |                       |
|----------------------|------------------------|----------------------|----------------------|----------------------|-----------------------|
| SGLT-2 inhibitor     | 0.29<br>(0.01,7.19)    | 0.88<br>(0.50,1.56)  | 0.79<br>(0.54,1.17)  | 0.87<br>(0.74,1.04)  | 2.64<br>(0.83,8.42)   |
| 3.43<br>(0.14,84.49) | GLP-1 receptor agonist | 3.03<br>(0.12,77.83) | 2.72<br>(0.11,68.08) | 3.00<br>(0.12,73.59) | 9.07<br>(0.30,271.42) |
| 1.13<br>(0.64,1.99)  | 0.33<br>(0.01,8.47)    | Thiazolidinedione    | 0.90<br>(0.47,1.71)  | 0.99<br>(0.58,1.70)  | 2.99<br>(1.09,8.21)   |
| 1.26<br>(0.86,1.85)  | 0.37<br>(0.01,9.18)    | 1.11<br>(0.59,2.12)  | DPP-4 inhibitor      | 1.10<br>(0.78,1.56)  | 3.33<br>(1.01,11.02)  |
| 1.14<br>(0.96,1.35)  | 0.33<br>(0.01,8.18)    | 1.01<br>(0.59,1.74)  | 0.91<br>(0.64,1.28)  | Placebo              | 3.02<br>(0.96,9.51)   |
| 0.38<br>(0.12,1.20)  | 0.11<br>(0.00,3.30)    | 0.33<br>(0.12,0.92)  | 0.30<br>(0.09,0.99)  | 0.33<br>(0.11,1.04)  | Standard therapy      |



**Table 12 Neuropathic pain**

The columns present the row drug class compared to the column drug class. The rows present the row drug class compared to the column drug class. The effect estimates are expressed as odds ratios and 95% confidence intervals. For example, the odds ratio for amputation with GLP-1 receptor agonist therapy compared to placebo is 0.33 (95% confidence interval 0.01 to 0.819). For the reverse, the effect of placebo compared to GLP-1 receptor agonist therapy on the odds of amputation is 3.00 (95% confidence interval 0.12 to 73.61).

|                              |                      |                      |
|------------------------------|----------------------|----------------------|
| GLP-1<br>receptor<br>agonist | 9.01<br>(0.10,832.5) | 3.00<br>(0.12,73.61) |
| 0.11<br>(0.00,10.27)         | DPP-4<br>inhibitor   | 0.33<br>(0.01,8.17)  |
| 0.33<br>(0.01,8.19)          | 3.00<br>(0.12,73.75) | Placebo              |

**Table 13 Diabetic ketoacidosis**

The columns present the row drug class compared to the column drug class. The rows present the row drug class compared to the column drug class. The effect estimates are expressed as odds ratios and 95% confidence intervals. For example, the odds ratio for diabetic ketoacidosis with SGLT-2 inhibitors compared to GLP-1 receptor agonists is 1.71 (95% confidence interval 0.79 to 3.69). For the reverse, the effect of a GLP-1 receptor compared to SGLT-2 inhibitor on the odds of diabetic ketoacidosis is 0.58 (95% confidence interval 0.27 to 1.26).

|                     |                        |                      |                     |                     |                             |                      |                     |
|---------------------|------------------------|----------------------|---------------------|---------------------|-----------------------------|----------------------|---------------------|
| SGLT-2 inhibitor    | 0.58<br>(0.27,1.26)    | 1.34<br>(0.19,9.42)  | 0.97<br>(0.28,3.30) | 0.87<br>(0.42,1.80) | 1.30<br>(0.13,13.01)        | 1.29<br>(0.13,12.87) | 0.96<br>(0.56,1.64) |
| 1.71<br>(0.79,3.69) | GLP-1 receptor agonist | 2.29<br>(0.28,18.64) | 1.65<br>(0.44,6.18) | 1.49<br>(0.69,3.20) | 2.23<br>(0.21,23.39)        | 2.20<br>(0.21,23.13) | 1.64<br>(0.90,2.99) |
| 0.75<br>(0.11,5.26) | 0.44<br>(0.05,3.56)    | Metformin            | 0.72<br>(0.07,7.24) | 0.65<br>(0.08,5.22) | 0.97<br>(0.05,19.88)        | 0.96<br>(0.05,19.67) | 0.72<br>(0.09,5.42) |
| 1.03<br>(0.30,3.52) | 0.60<br>(0.16,2.26)    | 1.38<br>(0.14,13.87) | Sulfonylurea        | 0.90<br>(0.28,2.85) | 1.35<br>(0.19,9.44)         | 1.33<br>(0.19,9.34)  | 0.99<br>(0.30,3.28) |
| 1.15<br>(0.55,2.38) | 0.67<br>(0.31,1.44)    | 1.54<br>(0.19,12.36) | 1.11<br>(0.35,3.52) | DPP-4 inhibitor     | 1.50<br>(0.16,14.39)        | 1.48<br>(0.15,14.23) | 1.10<br>(0.65,1.87) |
| 0.77<br>(0.08,7.68) | 0.45<br>(0.04,4.72)    | 1.03<br>(0.05,21.03) | 0.74<br>(0.11,5.21) | 0.67<br>(0.07,6.42) | Alpha glucosidase inhibitor | 0.99<br>(0.12,8.13)  | 0.74<br>(0.07,7.25) |
| 0.78<br>(0.08,7.76) | 0.45<br>(0.04,4.77)    | 1.04<br>(0.05,21.26) | 0.75<br>(0.11,5.27) | 0.68<br>(0.07,6.49) | 1.01<br>(0.12,8.31)         | Glitinide            | 0.75<br>(0.08,7.33) |
| 1.04<br>(0.61,1.78) | 0.61<br>(0.33,1.11)    | 1.39<br>(0.18,10.55) | 1.01<br>(0.30,3.33) | 0.91<br>(0.53,1.54) | 1.36<br>(0.14,13.34)        | 1.34<br>(0.14,13.19) | Placebo             |

**Table 14 Serious hyperglycaemia**

The columns present the row drug class compared to the column drug class. The rows present the row drug class compared to the column drug class. The effect estimates are expressed as odds ratios and 95% confidence intervals. For example, the odds ratio for serious hyperglycaemia with SGLT-2 inhibitors compared to GLP-1 receptor agonists is 1.48 (95% confidence interval 0.75 to 2.93). For the reverse, the effect of a GLP-1 receptor compared to SGLT-2 inhibitor on the odds of serious hyperglycaemia is 0.67 (95% confidence interval 0.34 to 1.33).

|                      |                        |                      |                      |                       |                      |                      |                      |                             |                       |                        |
|----------------------|------------------------|----------------------|----------------------|-----------------------|----------------------|----------------------|----------------------|-----------------------------|-----------------------|------------------------|
| SGLT-2 inhibitor     | 0.67<br>(0.34,1.33)    | 0.69<br>(0.16,2.95)  | 0.75<br>(0.32,1.75)  | 1.61<br>(0.50,5.22)   | 1.05<br>(0.57,1.93)  | 0.57<br>(0.20,1.62)  | 0.50<br>(0.05,4.81)  | 0.11<br>(0.02,0.53)         | 1.68<br>(0.99,2.86)   | 2.79<br>(0.78,9.95)    |
| 1.48<br>(0.75,2.93)  | GLP-1 receptor agonist | 1.02<br>(0.25,4.11)  | 1.12<br>(0.51,2.45)  | 2.39<br>(0.82,7.00)   | 1.56<br>(0.92,2.65)  | 0.85<br>(0.38,1.91)  | 0.75<br>(0.09,6.43)  | 0.17<br>(0.04,0.77)         | 2.50<br>(1.56,4.00)   | 4.14<br>(1.24,13.84)   |
| 1.45<br>(0.34,6.23)  | 0.98<br>(0.24,3.94)    | Metformin            | 1.09<br>(0.24,4.91)  | 2.34<br>(0.47,11.58)  | 1.53<br>(0.39,5.98)  | 0.83<br>(0.17,4.05)  | 0.73<br>(0.06,9.50)  | 0.16<br>(0.02,1.20)         | 2.45<br>(0.62,9.59)   | 4.05<br>(0.73,22.56)   |
| 1.33<br>(0.57,3.08)  | 0.89<br>(0.41,1.96)    | 0.91<br>(0.20,4.09)  | Sulfonylurea         | 2.14<br>(0.67,6.79)   | 1.39<br>(0.69,2.81)  | 0.76<br>(0.25,2.27)  | 0.67<br>(0.07,6.61)  | 0.15<br>(0.03,0.75)         | 2.23<br>(1.10,4.54)   | 3.70<br>(1.02,13.38)   |
| 0.62<br>(0.19,2.01)  | 0.42<br>(0.14,1.22)    | 0.43<br>(0.09,2.11)  | 0.47<br>(0.15,1.48)  | Thiazolidinedione     | 0.65<br>(0.23,1.88)  | 0.36<br>(0.11,1.18)  | 0.31<br>(0.03,3.46)  | 0.07<br>(0.01,0.42)         | 1.04<br>(0.36,3.04)   | 1.73<br>(0.56,5.35)    |
| 0.95<br>(0.52,1.75)  | 0.64<br>(0.38,1.09)    | 0.66<br>(0.17,2.57)  | 0.72<br>(0.36,1.45)  | 1.54<br>(0.53,4.43)   | DPP-4 inhibitor      | 0.55<br>(0.21,1.39)  | 0.48<br>(0.05,4.40)  | 0.11<br>(0.02,0.48)         | 1.60<br>(1.13,2.27)   | 2.66<br>(0.85,8.32)    |
| 1.74<br>(0.62,4.92)  | 1.18<br>(0.52,2.64)    | 1.20<br>(0.25,5.84)  | 1.31<br>(0.44,3.93)  | 2.81<br>(0.85,9.31)   | 1.83<br>(0.72,4.68)  | Basal insulin        | 0.88<br>(0.09,8.75)  | 0.20<br>(0.04,1.09)         | 2.94<br>(1.18,7.32)   | 4.87<br>(1.23,19.27)   |
| 1.99<br>(0.21,18.98) | 1.34<br>(0.16,11.53)   | 1.37<br>(0.11,17.76) | 1.50<br>(0.15,14.81) | 3.20<br>(0.29,35.51)  | 2.09<br>(0.23,19.15) | 1.14<br>(0.11,11.34) | Basal bolus insulin  | 0.22<br>(0.02,3.13)         | 3.34<br>(0.37,30.29)  | 5.54<br>(0.47,65.41)   |
| 8.88<br>(1.90,41.52) | 5.99<br>(1.30,27.45)   | 6.11<br>(0.83,44.77) | 6.69<br>(1.33,33.57) | 14.32<br>(2.36,86.66) | 9.32<br>(2.10,41.37) | 5.09<br>(0.92,28.21) | 4.47<br>(0.32,62.47) | Alpha glucosidase inhibitor | 14.95<br>(3.51,63.66) | 24.78<br>(3.84,159.69) |
| 0.59<br>(0.35,1.01)  | 0.40<br>(0.25,0.64)    | 0.41<br>(0.10,1.60)  | 0.45<br>(0.22,0.91)  | 0.96<br>(0.33,2.79)   | 0.62<br>(0.44,0.88)  | 0.34<br>(0.14,0.85)  | 0.30<br>(0.03,2.71)  | 0.07<br>(0.02,0.28)         | Placebo               | 1.66<br>(0.51,5.35)    |
| 0.36<br>(0.10,1.28)  | 0.24<br>(0.07,0.81)    | 0.25<br>(0.04,1.37)  | 0.27<br>(0.07,0.98)  | 0.58<br>(0.19,1.79)   | 0.38<br>(0.12,1.18)  | 0.21<br>(0.05,0.81)  | 0.18<br>(0.02,2.13)  | 0.04<br>(0.01,0.26)         | 0.60<br>(0.19,1.95)   | Standard therapy       |

**Table 15 Genital infection**

The columns present the row drug class compared to the column drug class. The rows present the row drug class compared to the column drug class. The effect estimates are expressed as odds ratios and 95% confidence intervals. For example, the odds ratio for genital infection with SGLT-2 inhibitors compared to GLP-1 receptor agonists is 5.00 (95% confidence interval 2.45 to 10.20). For the reverse, the effect of a GLP-1 receptor compared to SGLT-2 inhibitor on the odds of genital infection is 0.20 (95% confidence interval 0.10 to 0.41).

|                      |                        |                     |                     |                        |                     |                     |                      |
|----------------------|------------------------|---------------------|---------------------|------------------------|---------------------|---------------------|----------------------|
| SGLT-2 inhibitor     | 0.20<br>(0.10,0.41)    | 0.39<br>(0.21,0.73) | 0.16<br>(0.11,0.22) | 3.29<br>(0.13,83.62)   | 0.21<br>(0.14,0.33) | 0.29<br>(0.25,0.33) | 0.62<br>(0.20,1.94)  |
| 5.00<br>(2.45,10.20) | GLP-1 receptor agonist | 1.97<br>(0.77,5.07) | 0.79<br>(0.36,1.73) | 16.43<br>(0.60,451.95) | 1.07<br>(0.46,2.45) | 1.43<br>(0.69,2.95) | 3.13<br>(0.82,11.91) |
| 2.53<br>(1.37,4.70)  | 0.51<br>(0.20,1.30)    | Metformin           | 0.40<br>(0.20,0.80) | 8.33<br>(0.31,224.71)  | 0.54<br>(0.25,1.15) | 0.72<br>(0.38,1.37) | 1.58<br>(0.44,5.76)  |
| 6.37<br>(4.56,8.90)  | 1.27<br>(0.58,2.80)    | 2.51<br>(1.24,5.08) | Sulfonylurea        | 20.92<br>(0.81,541.85) | 1.36<br>(0.79,2.35) | 1.82<br>(1.26,2.63) | 3.98<br>(1.22,12.97) |
| 0.30<br>(0.01,7.75)  | 0.06<br>(0.00,1.67)    | 0.12<br>(0.00,3.24) | 0.05<br>(0.00,1.24) | Thiazolidinedione      | 0.06<br>(0.00,1.70) | 0.09<br>(0.00,2.22) | 0.19<br>(0.01,5.87)  |
| 4.69<br>(3.04,7.23)  | 0.94<br>(0.41,2.16)    | 1.85<br>(0.87,3.94) | 0.74<br>(0.43,1.27) | 15.41<br>(0.59,403.76) | DPP-4 inhibitor     | 1.34<br>(0.86,2.10) | 2.93<br>(0.87,9.86)  |
| 3.50<br>(3.01,4.07)  | 0.70<br>(0.34,1.44)    | 1.38<br>(0.73,2.61) | 0.55<br>(0.38,0.79) | 11.49<br>(0.45,293.51) | 0.75<br>(0.48,1.17) | Placebo             | 2.19<br>(0.70,6.85)  |
| 1.60<br>(0.52,4.97)  | 0.32<br>(0.08,1.22)    | 0.63<br>(0.17,2.29) | 0.25<br>(0.08,0.82) | 5.26<br>(0.17,162.18)  | 0.34<br>(0.10,1.15) | 0.46<br>(0.15,1.43) | Standard therapy     |

**Table 16 Fournier gangrene**

The columns present the row drug class compared to the column drug class. The rows present the row drug class compared to the column drug class. The effect estimates are expressed as odds ratios and 95% confidence intervals. For example, the odds ratio for Fournier gangrene with SGLT-2 inhibitors compared to placebo is 0.56 (95% confidence interval 0.16 to 1.92). For the reverse, the effect of placebo compared to SGLT-2 inhibitor on the odds of Fournier gangrene is 1.80 (95% confidence interval 0.52 to 6.21).

|                     |                      |                     |
|---------------------|----------------------|---------------------|
| SGLT-2 inhibitor    | 7.02<br>(0.56,87.98) | 1.80<br>(0.52,6.21) |
| 0.14<br>(0.01,1.78) | DPP-4 inhibitor      | 0.26<br>(0.03,2.32) |
| 0.56<br>(0.16,1.92) | 3.91<br>(0.43,35.37) | Placebo             |

**Table 17 Severe gastrointestinal events**

The columns present the row drug class compared to the column drug class. The rows present the row drug class compared to the column drug class. The effect estimates are expressed as odds ratios and 95% confidence intervals. The columns present the row drug class compared to the column drug class. The rows present the row drug class compared to the column drug class. The effect estimates are expressed as odds ratios and 95% confidence intervals. For example, the odds ratio for severe gastrointestinal events with a GLP-1 receptor agonist compared to a sulfonylurea is 1.27 (95% confidence interval 0.20 to 8.17). For the reverse, the effect of a sulfonylurea compared to a GLP-1 receptor on the odds of severe gastrointestinal events is 0.79 (95% confidence interval 0.12 to 5.11).

|                        |                      |                      |                      |                     |                      |                             |                     |                      |
|------------------------|----------------------|----------------------|----------------------|---------------------|----------------------|-----------------------------|---------------------|----------------------|
| GLP-1 receptor agonist | 2.08<br>(0.23,19.09) | 0.79<br>(0.12,5.11)  | 1.36<br>(0.16,11.38) | 0.71<br>(0.29,1.77) | 2.73<br>(0.64,11.59) | 3.19<br>(0.14,74.97)        | 0.41<br>(0.22,0.78) | 0.76<br>(0.10,5.98)  |
| 0.48<br>(0.05,4.39)    | Metformin            | 0.38<br>(0.07,2.09)  | 0.65<br>(0.17,2.51)  | 0.34<br>(0.04,3.02) | 1.31<br>(0.10,17.77) | 1.53<br>(0.16,14.52)        | 0.20<br>(0.02,1.91) | 0.37<br>(0.07,1.87)  |
| 1.27<br>(0.20,8.17)    | 2.64<br>(0.48,14.50) | Sulfonylurea         | 1.72<br>(0.33,8.97)  | 0.90<br>(0.16,5.18) | 3.45<br>(0.35,34.46) | 4.03<br>(0.24,67.91)        | 0.52<br>(0.08,3.52) | 0.97<br>(0.15,6.27)  |
| 0.74<br>(0.09,6.18)    | 1.54<br>(0.40,5.91)  | 0.58<br>(0.11,3.04)  | Thiazolidinedione    | 0.52<br>(0.06,4.27) | 2.01<br>(0.16,25.03) | 2.35<br>(0.17,32.38)        | 0.30<br>(0.03,2.65) | 0.56<br>(0.14,2.22)  |
| 1.40<br>(0.57,3.48)    | 2.93<br>(0.33,25.87) | 1.11<br>(0.19,6.37)  | 1.91<br>(0.23,15.51) | DPP-4 inhibitor     | 3.83<br>(0.78,18.95) | 4.48<br>(0.20,102.70)       | 0.58<br>(0.22,1.52) | 1.07<br>(0.13,8.53)  |
| 0.37<br>(0.09,1.55)    | 0.76<br>(0.06,10.36) | 0.29<br>(0.03,2.89)  | 0.50<br>(0.04,6.19)  | 0.26<br>(0.05,1.29) | Basal insulin        | 1.17<br>(0.04,36.59)        | 0.15<br>(0.03,0.70) | 0.28<br>(0.02,3.33)  |
| 0.31<br>(0.01,7.38)    | 0.65<br>(0.07,6.21)  | 0.25<br>(0.01,4.17)  | 0.43<br>(0.03,5.87)  | 0.22<br>(0.01,5.13) | 0.86<br>(0.03,26.84) | Alpha glucosidase inhibitor | 0.13<br>(0.01,3.15) | 0.24<br>(0.01,3.86)  |
| 2.46<br>(1.22,4.97)    | 5.07<br>(0.52,49.20) | 1.92<br>(0.28,13.02) | 3.30<br>(0.38,28.90) | 1.76<br>(0.42,7.34) | 6.65<br>(1.43,30.98) | 7.76<br>(0.32,190.02)       | Placebo             | 1.86<br>(0.22,15.42) |
| 1.31<br>(0.17,10.27)   | 2.73<br>(0.53,13.94) | 1.04<br>(0.16,6.72)  | 1.78<br>(0.45,7.01)  | 0.93<br>(0.12,7.43) | 3.58<br>(0.30,42.59) | 4.18<br>(0.26,67.28)        | 0.54<br>(0.06,4.47) | Standard therapy     |

**Table 18 Pancreatic cancer**

The columns present the row drug class compared to the column drug class. The rows present the row drug class compared to the column drug class. The effect estimates are expressed as odds ratios and 95% confidence intervals. For example, the odds ratio for pancreatic cancer with SGLT-2 inhibitors compared to GLP-1 receptor agonists is 1.49 (95% confidence interval 0.43 to 5.19). For the reverse, the effect of a GLP-1 receptor compared to SGLT-2 inhibitor on the odds of pancreatic cancer is 0.67 (95% confidence interval 0.19 to 2.33).

|                       |                        |                      |                      |                      |                      |                      |
|-----------------------|------------------------|----------------------|----------------------|----------------------|----------------------|----------------------|
| SGLT-2 inhibitor      | 0.67<br>(0.19,2.33)    | 0.64<br>(0.16,2.51)  | 0.49<br>(0.14,1.72)  | 0.44<br>(0.06,3.07)  | 0.23<br>(0.01,7.08)  | 0.56<br>(0.17,1.83)  |
| 1.49<br>(0.43,5.19)   | GLP-1 receptor agonist | 0.96<br>(0.40,2.30)  | 0.73<br>(0.37,1.42)  | 0.65<br>(0.15,2.90)  | 0.34<br>(0.01,8.36)  | 0.84<br>(0.55,1.28)  |
| 1.56<br>(0.40,6.09)   | 1.05<br>(0.43,2.52)    | Sulfonylurea         | 0.76<br>(0.39,1.47)  | 0.68<br>(0.12,3.86)  | 0.35<br>(0.01,9.84)  | 0.88<br>(0.39,1.96)  |
| 2.05<br>(0.58,7.25)   | 1.38<br>(0.70,2.70)    | 1.32<br>(0.68,2.55)  | DPP-4 inhibitor      | 0.90<br>(0.18,4.63)  | 0.46<br>(0.02,12.35) | 1.16<br>(0.69,1.95)  |
| 2.28<br>(0.33,15.90)  | 1.53<br>(0.34,6.77)    | 1.46<br>(0.26,8.23)  | 1.11<br>(0.22,5.69)  | Basal insulin        | 0.51<br>(0.01,17.74) | 1.28<br>(0.27,6.05)  |
| 4.44<br>(0.14,139.86) | 2.98<br>(0.12,74.30)   | 2.85<br>(0.10,79.88) | 2.16<br>(0.08,57.81) | 1.95<br>(0.06,67.53) | Bolus insulin        | 2.51<br>(0.10,64.21) |
| 1.77<br>(0.55,5.75)   | 1.19<br>(0.78,1.81)    | 1.14<br>(0.51,2.54)  | 0.86<br>(0.51,1.45)  | 0.78<br>(0.17,3.66)  | 0.40<br>(0.02,10.22) | Placebo              |

**Table 19 Pancreatitis**

The columns present the row drug class compared to the column drug class. The rows present the row drug class compared to the column drug class. The effect estimates are expressed as odds ratios and 95% confidence intervals. For example, the odds ratio for pancreatitis with SGLT-2 inhibitors compared to GLP-1 receptor agonists is 0.54 (95% confidence interval 0.31 to 0.94). For the reverse, the effect of a GLP-1 receptor compared to SGLT-2 inhibitor on the odds of pancreatitis is 1.84 (95% confidence interval 1.06 to 3.19).

|                      |                        |                      |                      |                      |                      |                      |                      |                             |                         |                      |                      |
|----------------------|------------------------|----------------------|----------------------|----------------------|----------------------|----------------------|----------------------|-----------------------------|-------------------------|----------------------|----------------------|
| SGLT-2 inhibitor     | 1.84<br>(1.06,3.19)    | 0.78<br>(0.04,16.94) | 2.17<br>(0.83,5.66)  | 1.79<br>(0.60,5.33)  | 2.28<br>(1.27,4.08)  | 0.75<br>(0.21,2.66)  | 0.81<br>(0.04,18.94) | 4.38<br>(0.08,247.19)       | 12.99<br>(0.46,366.18)  | 1.56<br>(0.95,2.54)  | 0.82<br>(0.18,3.62)  |
| 0.54<br>(0.31,0.94)  | GLP-1 receptor agonist | 0.42<br>(0.02,8.91)  | 1.18<br>(0.47,2.99)  | 0.97<br>(0.36,2.61)  | 1.24<br>(0.81,1.90)  | 0.41<br>(0.13,1.28)  | 0.44<br>(0.02,9.84)  | 2.38<br>(0.04,133.48)       | 7.06<br>(0.25,197.45)   | 0.85<br>(0.64,1.11)  | 0.44<br>(0.11,1.82)  |
| 1.29<br>(0.06,28.16) | 2.37<br>(0.11,50.14)   | Metformin            | 2.80<br>(0.12,66.43) | 2.30<br>(0.10,52.77) | 2.94<br>(0.14,61.48) | 0.97<br>(0.04,25.00) | 1.05<br>(0.01,80.30) | 5.64<br>(0.04,869.84)       | 16.75<br>(0.19,1508.73) | 2.01<br>(0.10,42.31) | 1.05<br>(0.04,28.46) |
| 0.46<br>(0.18,1.20)  | 0.85<br>(0.33,2.14)    | 0.36<br>(0.02,8.47)  | Sulfonylurea         | 0.82<br>(0.23,2.93)  | 1.05<br>(0.41,2.67)  | 0.35<br>(0.08,1.50)  | 0.37<br>(0.01,9.46)  | 2.01<br>(0.04,101.40)       | 5.98<br>(0.24,146.51)   | 0.72<br>(0.29,1.79)  | 0.38<br>(0.07,1.91)  |
| 0.56<br>(0.19,1.67)  | 1.03<br>(0.38,2.76)    | 0.43<br>(0.02,9.95)  | 1.22<br>(0.34,4.33)  | Thiazolidinedione    | 1.28<br>(0.47,3.48)  | 0.42<br>(0.10,1.77)  | 0.46<br>(0.02,10.96) | 2.45<br>(0.04,150.74)       | 7.27<br>(0.23,227.21)   | 0.87<br>(0.32,2.35)  | 0.46<br>(0.15,1.38)  |
| 0.44<br>(0.25,0.78)  | 0.81<br>(0.53,1.23)    | 0.34<br>(0.02,7.11)  | 0.95<br>(0.37,2.42)  | 0.78<br>(0.29,2.14)  | DPP-4 inhibitor      | 0.33<br>(0.10,1.11)  | 0.36<br>(0.02,8.13)  | 1.92<br>(0.03,107.82)       | 5.70<br>(0.20,159.53)   | 0.68<br>(0.48,0.97)  | 0.36<br>(0.09,1.49)  |
| 1.33<br>(0.38,4.71)  | 2.45<br>(0.78,7.66)    | 1.03<br>(0.04,26.59) | 2.89<br>(0.67,12.48) | 2.37<br>(0.57,9.98)  | 3.03<br>(0.90,10.18) | Basal insulin        | 1.08<br>(0.04,29.26) | 5.82<br>(0.09,381.47)       | 17.27<br>(0.51,582.07)  | 2.07<br>(0.64,6.68)  | 1.09<br>(0.20,5.78)  |
| 1.23<br>(0.05,28.57) | 2.26<br>(0.10,50.22)   | 0.95<br>(0.01,72.86) | 2.67<br>(0.11,67.38) | 2.19<br>(0.09,52.73) | 2.80<br>(0.12,63.71) | 0.92<br>(0.03,24.97) | Basal bolus insulin  | 5.38<br>(0.03,862.10)       | 15.95<br>(0.17,1502.35) | 1.91<br>(0.09,42.91) | 1.00<br>(0.04,28.37) |
| 0.23<br>(0.00,12.90) | 0.42<br>(0.01,23.57)   | 0.18<br>(0.00,27.31) | 0.50<br>(0.01,24.98) | 0.41<br>(0.01,25.11) | 0.52<br>(0.01,29.25) | 0.17<br>(0.00,11.26) | 0.19<br>(0.00,29.83) | Alpha glucosidase inhibitor | 2.97<br>(0.12,72.68)    | 0.36<br>(0.01,19.89) | 0.19<br>(0.00,12.99) |
| 0.08<br>(0.00,2.17)  | 0.14<br>(0.01,3.96)    | 0.06<br>(0.00,5.38)  | 0.17<br>(0.01,4.10)  | 0.14<br>(0.00,4.30)  | 0.18<br>(0.01,4.92)  | 0.06<br>(0.00,1.95)  | 0.06<br>(0.00,5.90)  | 0.34<br>(0.01,8.25)         | Glitinide               | 0.12<br>(0.00,3.34)  | 0.06<br>(0.00,2.28)  |
| 0.64<br>(0.39,1.05)  | 1.18<br>(0.90,1.56)    | 0.50<br>(0.02,10.51) | 1.40<br>(0.56,3.49)  | 1.15<br>(0.42,3.10)  | 1.46<br>(1.03,2.08)  | 0.48<br>(0.15,1.56)  | 0.52<br>(0.02,11.74) | 2.81<br>(0.05,157.35)       | 8.35<br>(0.30,232.65)   | Placebo              | 0.52<br>(0.13,2.16)  |
| 1.22<br>(0.28,5.43)  | 2.25<br>(0.55,9.22)    | 0.95<br>(0.04,25.66) | 2.66<br>(0.52,13.54) | 2.19<br>(0.73,6.58)  | 2.79<br>(0.67,11.62) | 0.92<br>(0.17,4.90)  | 1.00<br>(0.04,28.20) | 5.36<br>(0.08,373.11)       | 15.90<br>(0.44,575.71)  | 1.91<br>(0.46,7.86)  | Standard therapy     |



**Table 20 Glycated haemoglobin A1C**

The columns present the row drug class compared to the column drug class. The rows present the row drug class compared to the column drug class. The effect estimates are expressed as a mean difference (%) and 95% confidence interval. For example, the glycated haemoglobin difference with an SGLT-2 inhibitor treatment compared to a GLP-1 receptor agonist is 0.28% (95% confidence interval 0.19% to 0.37%). The reverse is true for a GLP-1 receptor agonist compared to an SGLT-2 inhibitor (-0.28 kg, 95% confidence interval -0.37,-0.19).

|                        |                        |                        |                        |                        |                        |                        |                        |                        |                             |                        |                     |                        |
|------------------------|------------------------|------------------------|------------------------|------------------------|------------------------|------------------------|------------------------|------------------------|-----------------------------|------------------------|---------------------|------------------------|
| SGLT-2 inhibitor       | -0.28<br>(-0.37,-0.19) | -0.20<br>(-0.30,-0.09) | -0.05<br>(-0.15,0.05)  | -0.10<br>(-0.19,-0.01) | 0.01<br>(-0.07,0.09)   | -0.14<br>(-0.26,-0.01) | -0.26<br>(-0.61,0.09)  | -0.31<br>(-0.58,-0.04) | 0.07<br>(-0.05,0.19)        | -0.13<br>(-0.31,0.04)  | 0.60<br>(0.54,0.67) | 0.41<br>(0.30,0.52)    |
| 0.28<br>(0.19,0.37)    | GLP-1 receptor agonist | 0.09<br>(-0.02,0.19)   | 0.23<br>(0.14,0.32)    | 0.18<br>(0.09,0.27)    | 0.29<br>(0.22,0.36)    | 0.14<br>(0.04,0.25)    | 0.02<br>(-0.32,0.36)   | -0.03<br>(-0.29,0.23)  | 0.36<br>(0.24,0.47)         | 0.15<br>(-0.02,0.32)   | 0.89<br>(0.82,0.95) | 0.69<br>(0.59,0.79)    |
| 0.20<br>(0.09,0.30)    | -0.09<br>(-0.19,0.02)  | Metformin              | 0.15<br>(0.04,0.25)    | 0.09<br>(-0.00,0.19)   | 0.20<br>(0.11,0.30)    | 0.06<br>(-0.08,0.19)   | -0.07<br>(-0.42,0.29)  | -0.12<br>(-0.39,0.16)  | 0.27<br>(0.14,0.40)         | 0.06<br>(-0.11,0.23)   | 0.80<br>(0.71,0.89) | 0.60<br>(0.48,0.72)    |
| 0.05<br>(-0.05,0.15)   | -0.23<br>(-0.32,-0.14) | -0.15<br>(-0.25,-0.04) | Sulfonylurea           | -0.05<br>(-0.13,0.03)  | 0.06<br>(-0.02,0.14)   | -0.09<br>(-0.22,0.04)  | -0.21<br>(-0.56,0.14)  | -0.26<br>(-0.53,0.01)  | 0.12<br>(0.00,0.24)         | -0.08<br>(-0.24,0.07)  | 0.65<br>(0.57,0.74) | 0.46<br>(0.35,0.57)    |
| 0.10<br>(0.01,0.19)    | -0.18<br>(-0.27,-0.09) | -0.09<br>(-0.19,0.00)  | 0.05<br>(-0.03,0.13)   | Thiazolidinedione      | 0.11<br>(0.03,0.19)    | -0.04<br>(-0.16,0.08)  | -0.16<br>(-0.51,0.19)  | -0.21<br>(-0.48,0.06)  | 0.17<br>(0.06,0.29)         | -0.03<br>(-0.20,0.13)  | 0.71<br>(0.63,0.78) | 0.51<br>(0.40,0.61)    |
| -0.01<br>(-0.09,0.07)  | -0.29<br>(-0.36,-0.22) | -0.20<br>(-0.30,-0.11) | -0.06<br>(-0.14,0.02)  | -0.11<br>(-0.19,-0.03) | DPP-4 inhibitor        | -0.15<br>(-0.26,-0.03) | -0.27<br>(-0.61,0.07)  | -0.32<br>(-0.59,-0.05) | 0.06<br>(-0.04,0.17)        | -0.14<br>(-0.31,0.02)  | 0.60<br>(0.54,0.65) | 0.40<br>(0.30,0.49)    |
| 0.14<br>(0.01,0.26)    | -0.14<br>(-0.25,-0.04) | -0.06<br>(-0.19,0.08)  | 0.09<br>(-0.04,0.22)   | 0.04<br>(-0.08,0.16)   | 0.15<br>(0.03,0.26)    | Basal insulin          | -0.12<br>(-0.47,0.22)  | -0.17<br>(-0.44,0.10)  | 0.21<br>(0.07,0.36)         | 0.00<br>(-0.19,0.19)   | 0.74<br>(0.63,0.86) | 0.55<br>(0.42,0.68)    |
| 0.26<br>(-0.09,0.61)   | -0.02<br>(-0.36,0.32)  | 0.07<br>(-0.29,0.42)   | 0.21<br>(-0.14,0.56)   | 0.16<br>(-0.19,0.51)   | 0.27<br>(-0.07,0.61)   | 0.12<br>(-0.22,0.47)   | Basal bolus insulin    | -0.05<br>(-0.48,0.38)  | 0.33<br>(-0.02,0.69)        | 0.13<br>(-0.25,0.50)   | 0.87<br>(0.52,1.21) | 0.67<br>(0.32,1.02)    |
| 0.31<br>(0.04,0.58)    | 0.03<br>(-0.23,0.29)   | 0.12<br>(-0.16,0.39)   | 0.26<br>(-0.01,0.53)   | 0.21<br>(-0.06,0.48)   | 0.32<br>(0.05,0.59)    | 0.17<br>(-0.10,0.44)   | 0.05<br>(-0.38,0.48)   | Bolus insulin          | 0.39<br>(0.10,0.67)         | 0.18<br>(-0.13,0.48)   | 0.92<br>(0.65,1.18) | 0.72<br>(0.44,0.99)    |
| -0.07<br>(-0.19,0.05)  | -0.36<br>(-0.47,-0.24) | -0.27<br>(-0.40,-0.14) | -0.12<br>(-0.24,-0.00) | -0.17<br>(-0.29,-0.06) | -0.06<br>(-0.17,0.04)  | -0.21<br>(-0.36,-0.07) | -0.33<br>(-0.69,0.02)  | -0.39<br>(-0.67,-0.10) | Alpha glucosidase inhibitor | -0.21<br>(-0.39,-0.02) | 0.53<br>(0.43,0.63) | 0.33<br>(0.20,0.46)    |
| 0.13<br>(-0.04,0.31)   | -0.15<br>(-0.32,0.02)  | -0.06<br>(-0.23,0.11)  | 0.08<br>(-0.07,0.24)   | 0.03<br>(-0.13,0.20)   | 0.14<br>(-0.02,0.31)   | -0.00<br>(-0.19,0.19)  | -0.13<br>(-0.50,0.25)  | -0.18<br>(-0.48,0.13)  | 0.21<br>(0.02,0.39)         | Glitinide              | 0.74<br>(0.58,0.90) | 0.54<br>(0.36,0.72)    |
| -0.60<br>(-0.67,-0.54) | -0.89<br>(-0.95,-0.82) | -0.80<br>(-0.89,-0.71) | -0.65<br>(-0.74,-0.57) | -0.71<br>(-0.78,-0.63) | -0.60<br>(-0.65,-0.54) | -0.74<br>(-0.86,-0.63) | -0.87<br>(-1.21,-0.52) | -0.92<br>(-1.18,-0.65) | -0.53<br>(-0.63,-0.43)      | -0.74<br>(-0.90,-0.58) | Placebo             | -0.20<br>(-0.30,-0.10) |
| -0.41<br>(-0.52,-0.30) | -0.69<br>(-0.79,-0.59) | -0.60<br>(-0.72,-0.48) | -0.46<br>(-0.57,-0.35) | -0.51<br>(-0.61,-0.40) | -0.40<br>(-0.49,-0.30) | -0.55<br>(-0.68,-0.42) | -0.67<br>(-1.02,-0.32) | -0.72<br>(-0.99,-0.44) | -0.33<br>(-0.46,-0.20)      | -0.54<br>(-0.72,-0.36) | 0.20<br>(0.10,0.30) | Standard therapy       |

## Appendix 8 GRADE summary of findings for SGLT-2 inhibitors and GLP-1 receptor agonists compared to placebo or each other

**Table 1: Cardiovascular mortality**

| Comparison                 | Relative effect        | <u>Anticipated absolute effects over 5 years</u> |                       |                                | Anticipated absolute effects (95% CI) over 5 years | Certainty in treatment effects (GRADE) | Plain text summary                                                                                                                                   |
|----------------------------|------------------------|--------------------------------------------------|-----------------------|--------------------------------|----------------------------------------------------|----------------------------------------|------------------------------------------------------------------------------------------------------------------------------------------------------|
|                            |                        | Baseline risk                                    | Risk with control     | Risk with intervention         |                                                    |                                        |                                                                                                                                                      |
| SGLT 2 inhibitor v placebo | OR 0.84 (0.76 to 0.92) | Very low                                         | Placebo: 13 per 1000  | SGLT-2 inhibitor: 11 per 1000  | 2 fewer per 1000 (from 1 to 3 fewer)               | Moderate due to directness             | SGLT-2 inhibitor therapy probably reduces cardiovascular mortality in people with diabetes and few or no cardiovascular risk factors.                |
|                            |                        | Low                                              | Placebo: 46 per 1000  | SGLT-2 inhibitor: 39 per 1000  | 7 fewer per 1000 (from 4 fewer to 11 fewer)        | High                                   | SGLT-2 inhibitor therapy reduces cardiovascular mortality in people with diabetes and cardiovascular risk factors.                                   |
|                            |                        | Moderate                                         | Placebo: 79 per 1000  | SGLT-2 inhibitor: 67 per 1000  | 12 fewer per 1000 (from 6 fewer to 18 fewer)       | High                                   | SGLT-2 inhibitor therapy reduces cardiovascular mortality in people with diabetes and established cardiovascular disease.                            |
|                            |                        | High                                             | Placebo: 112 per 1000 | SGLT-2 inhibitor: 96 per 1000  | 16 fewer per 1000 (from 3 fewer to 23 fewer)       | High                                   | SGLT-2 inhibitor therapy reduces cardiovascular mortality in people with diabetes and chronic kidney disease.                                        |
|                            |                        | Very high                                        | Placebo: 175 per 1000 | SGLT-2 inhibitor: 151 per 1000 | 24 fewer per 1000 (from 12 fewer to 36 fewer)      | High                                   | SGLT-2 inhibitor therapy reduces cardiovascular mortality in people with diabetes and established cardiovascular disease and chronic kidney disease. |

**Table 1: Cardiovascular mortality**

| Comparison                       | Relative effect        | Anticipated absolute effects over 5 years |                       |                                      | Anticipated absolute effects (95% CI) over 5 years | Certainty in treatment effects (GRADE) | Plain text summary                                                                                                                                         |
|----------------------------------|------------------------|-------------------------------------------|-----------------------|--------------------------------------|----------------------------------------------------|----------------------------------------|------------------------------------------------------------------------------------------------------------------------------------------------------------|
|                                  |                        | Baseline risk                             | Risk with control     | Risk with intervention               |                                                    |                                        |                                                                                                                                                            |
| GLP-1 receptor agonist v placebo | OR 0.88 (0.83 to 0.94) | Very low                                  | Placebo: 13 per 1000  | GLP-1 receptor agonist: 11 per 1000  | 2 fewer per 1000 (from 1 fewer to 3 fewer)         | Moderate due to directness             | GLP-1 receptor agonist therapy probably reduces cardiovascular mortality in people with diabetes and few or no cardiovascular risk factors.                |
|                                  |                        | Low                                       | Placebo: 46 per 1000  | GLP-1 receptor agonist: 41 per 1000  | 5 fewer per 1000 (from 2 fewer to 9 fewer)         | High                                   | GLP-1 receptor agonist therapy reduces cardiovascular mortality in people with diabetes and cardiovascular risk factors.                                   |
|                                  |                        | Moderate                                  | Placebo: 79 per 1000  | GLP-1 receptor agonist: 67 per 1000  | 12 fewer per 1000 (from 6 fewer to 18 fewer)       | High                                   | reduces cardiovascular mortality in people with diabetes and established cardiovascular disease.                                                           |
|                                  |                        | High                                      | Placebo: 112 per 1000 | GLP-1 receptor agonist: 100 per 1000 | 12 fewer per 1000 (from 4 fewer to 20 fewer)       | High                                   | GLP-1 receptor agonist therapy reduces cardiovascular mortality in people with diabetes and chronic kidney disease.                                        |
|                                  |                        | Very high                                 | Placebo: 175 per 1000 | GLP-1 receptor agonist: 151 per 1000 | 24 fewer per 1000 (from 12 fewer to 36 fewer)      | High                                   | GLP-1 receptor agonist therapy reduces cardiovascular mortality in people with diabetes and established cardiovascular disease and chronic kidney disease. |

**Table 1: Cardiovascular mortality**

| Comparison                                | Relative effect        | Anticipated absolute effects over 5 years |                                      |                                | Anticipated absolute effects (95% CI) over 5 years | Certainty in treatment effects (GRADE) | Plain text summary                                                                                                                                                                                                |
|-------------------------------------------|------------------------|-------------------------------------------|--------------------------------------|--------------------------------|----------------------------------------------------|----------------------------------------|-------------------------------------------------------------------------------------------------------------------------------------------------------------------------------------------------------------------|
|                                           |                        | Baseline risk                             | Risk with control                    | Risk with intervention         |                                                    |                                        |                                                                                                                                                                                                                   |
| SGLT 2 inhibitor v GLP-1 receptor agonist | OR 0.96 (0.84 to 1.09) | Very low                                  | GLP-1 receptor agonist: 11 per 1000  | SGLT-2 inhibitor: 11 per 1000  | 0 fewer per 1000 (from 2 fewer to 1 more)          | Moderate due to directness             | There is probably no difference between SGLT-2 inhibitor therapy and GLP-1 receptor agonist therapy on cardiovascular mortality in people with diabetes and few or no cardiovascular risk factors.                |
|                                           |                        | Low                                       | GLP-1 receptor agonist: 41 per 1000  | SGLT-2 inhibitor: 39 per 1000  | 2 fewer per 1000 (from 6 fewer to 4 more)          | High                                   | There is no difference between SGLT-2 inhibitor therapy and GLP-1 receptor agonist therapy on cardiovascular mortality in people with diabetes and cardiovascular risk factors.                                   |
|                                           |                        | Moderate                                  | GLP-1 receptor agonist: 70 per 1000  | SGLT-2 inhibitor: 67 per 1000  | 3 fewer per 1000 (from 11 fewer to 6 more)         | High                                   | There is no difference between SGLT-2 inhibitor therapy and GLP-1 receptor agonist therapy on cardiovascular mortality in people with diabetes and established cardiovascular disease.                            |
|                                           |                        | High                                      | GLP-1 receptor agonist: 100 per 1000 | SGLT-2 inhibitor: 96 per 1000  | 4 fewer per 1000 (from 15 fewer to 8 more)         | High                                   | There is no difference between SGLT-2 inhibitor therapy and GLP-1 receptor agonist therapy on cardiovascular mortality in people with diabetes and chronic kidney disease.                                        |
|                                           |                        | Very high                                 | GLP-1 receptor agonist: 157 per 1000 | SGLT-2 inhibitor: 152 per 1000 | 5 fewer per 1000 (22 fewer to 12 more)             | High                                   | There is no difference between SGLT-2 inhibitor therapy and GLP-1 receptor agonist therapy on cardiovascular mortality in people with diabetes and established cardiovascular disease and chronic kidney disease. |

CI= confidence interval. OR = odds ratio. We used the point estimate of absolute effect for GLP-1 receptor agonist therapy, obtained from GLP-1 receptor agonist therapy versus placebo, to calculate absolute effect for SGLT-2 inhibitors v GLP-1 receptor agonists.

**Table 2 Nonfatal myocardial infarction**

| Comparison                      | Relative effect        | Anticipated absolute effects over 5 years |                       |                                | Anticipated absolute effects (95% CI) over 5 years | Certainty in treatment effects (GRADE) | Plain text summary                                                                                                                                         |
|---------------------------------|------------------------|-------------------------------------------|-----------------------|--------------------------------|----------------------------------------------------|----------------------------------------|------------------------------------------------------------------------------------------------------------------------------------------------------------|
|                                 |                        | Baseline risk                             | Risk with control     | Risk with intervention         |                                                    |                                        |                                                                                                                                                            |
| SGLT-2 inhibitor versus placebo | OR 0.87 (0.79 to 0.97) | Very low                                  | Placebo: 30 per 1000  | SGLT-2 inhibitor: 26 per 1000  | 4 fewer per 1000 (from 1 fewer to 6 fewer)         | Moderate due to indirectness           | SGLT-2 inhibitor therapy probably reduces nonfatal myocardial infarction in people with diabetes and few or no cardiovascular risk factors.                |
|                                 |                        | Low                                       | Placebo: 58 per 1000  | SGLT-2 inhibitor: 51 per 1000  | 7 fewer per 1000 (from 2 fewer to 12 fewer)        | High                                   | SGLT-2 inhibitor therapy reduces nonfatal myocardial infarction in people with diabetes and cardiovascular risk factors.                                   |
|                                 |                        | Moderate                                  | Placebo: 108 per 1000 | SGLT-2 inhibitor: 95 per 1000  | 13 fewer per 1000 (from 3 fewer to 21 fewer)       | High                                   | SGLT-2 inhibitor therapy reduces nonfatal myocardial infarction in people with diabetes and established cardiovascular disease.                            |
|                                 |                        | High                                      | Placebo: 120 per 1000 | SGLT-2 inhibitor: 106 per 1000 | 14 fewer per 1000 (from 3 fewer to 23 fewer)       | High                                   | SGLT-2 inhibitor therapy reduces nonfatal myocardial infarction in people with diabetes and chronic kidney disease.                                        |
|                                 |                        | Very high                                 | Placebo: 190 per 1000 | SGLT-2 inhibitor: 169 per 1000 | 21 fewer per 1000 (from 5 fewer to 34 fewer)       | High                                   | SGLT-2 inhibitor therapy reduces nonfatal myocardial infarction in people with diabetes and established cardiovascular disease and chronic kidney disease. |

**Table 2 Nonfatal myocardial infarction**

| Comparison                            | Relative effect        | Anticipated absolute effects over 5 years |                       |                                      | Anticipated absolute effects (95% CI) over 5 years | Certainty in treatment effects (GRADE) | Plain text summary                                                                                                                                               |
|---------------------------------------|------------------------|-------------------------------------------|-----------------------|--------------------------------------|----------------------------------------------------|----------------------------------------|------------------------------------------------------------------------------------------------------------------------------------------------------------------|
|                                       |                        | Baseline risk                             | Risk with control     | Risk with intervention               |                                                    |                                        |                                                                                                                                                                  |
| GLP-1 receptor agonist versus placebo | OR 0.92 (0.85 to 0.99) | Very low                                  | Placebo: 30 per 1000  | GLP-1 receptor agonist: 28 per 1000  | 2 fewer per 1000 (from 0 fewer to 4 fewer)         | Moderate due to indirectness           | GLP-1 receptor agonist therapy probably reduces nonfatal myocardial infarction in people with diabetes and few or no cardiovascular risk factors.                |
|                                       |                        | Low                                       | Placebo: 58 per 1000  | GLP-1 receptor agonist: 54 per 1000  | 4 fewer per 1000 (from 1 fewer to 8 fewer)         | High                                   | GLP-1 receptor agonist therapy reduces nonfatal myocardial infarction in people with diabetes and cardiovascular risk factors.                                   |
|                                       |                        | Moderate                                  | Placebo: 108 per 1000 | GLP-1 receptor agonist: 100 per 1000 | 8 fewer per 1000 (from 1 fewer to 15 fewer)        | High                                   | GLP-1 receptor agonist therapy reduces nonfatal myocardial infarction in people with diabetes and established cardiovascular disease.                            |
|                                       |                        | High                                      | Placebo: 120 per 1000 | GLP-1 receptor agonist: 111 per 1000 | 9 fewer per 1000 (from 1 fewer to 16 fewer)        | High                                   | GLP-1 receptor agonist therapy reduces nonfatal myocardial infarction in people with diabetes and chronic kidney disease.                                        |
|                                       |                        | Very high                                 | Placebo: 190 per 1000 | GLP-1 receptor agonist: 177 per 1000 | 13 fewer per 1000 (from 2 fewer to 24 fewer)       | High                                   | GLP-1 receptor agonist therapy reduces nonfatal myocardial infarction in people with diabetes and established cardiovascular disease and chronic kidney disease. |

**Table 2 Nonfatal myocardial infarction**

| Comparison                                     | Relative effect        | Anticipated absolute effects over 5 years |                                      |                                | Anticipated absolute effects (95% CI) over 5 years | Certainty in treatment effects (GRADE) | Plain text summary                                                                                                                                                                                                      |
|------------------------------------------------|------------------------|-------------------------------------------|--------------------------------------|--------------------------------|----------------------------------------------------|----------------------------------------|-------------------------------------------------------------------------------------------------------------------------------------------------------------------------------------------------------------------------|
|                                                |                        | Baseline risk                             | Risk with control                    | Risk with intervention         |                                                    |                                        |                                                                                                                                                                                                                         |
| SGLT-2 inhibitor versus GLP-1 receptor agonist | OR 0.95 (0.84 to 1.08) | Very low                                  | GLP-1 receptor agonist: 28 per 1000  | SGLT-2 inhibitor: 27 per 1000  | 1 fewer per 1000 (from 4 fewer to 2 more)          | Moderate due to indirectness           | There is probably no difference between SGLT-2 inhibitor therapy and GLP-1 receptor agonist therapy on nonfatal myocardial infarction in people with diabetes and few or no cardiovascular risk factors.                |
|                                                |                        | Low                                       | GLP-1 receptor agonist: 54 per 1000  | SGLT-2 inhibitor: 51 per 1000  | 3 fewer per 1000 (from 8 fewer to 4 more)          | High                                   | There is no difference between SGLT-2 inhibitor therapy and GLP-1 receptor agonist therapy on nonfatal myocardial infarction in people with diabetes and cardiovascular risk factors.                                   |
|                                                |                        | Moderate                                  | GLP-1 receptor agonist: 100 per 1000 | SGLT-2 inhibitor: 95 per 1000  | 5 fewer per 1000 (from 15 fewer to 7 more)         | High                                   | There is no difference between SGLT-2 inhibitor therapy and GLP-1 receptor agonist therapy on nonfatal myocardial infarction in people with diabetes and established cardiovascular disease.                            |
|                                                |                        | High                                      | GLP-1 receptor agonist: 111 per 1000 | SGLT-2 inhibitor: 106 per 1000 | 5 fewer per 1000 (from 16 fewer to 8 more)         | High                                   | There is no difference between SGLT-2 inhibitor therapy and GLP-1 receptor agonist therapy on nonfatal myocardial infarction in people with diabetes and chronic kidney disease.                                        |
|                                                |                        | Very high                                 | GLP-1 receptor agonist: 177 per 1000 | SGLT-2 inhibitor: 170 per 1000 | 7 fewer per 1000 (24 fewer to 11 more)             | High                                   | There is no difference between SGLT-2 inhibitor therapy and GLP-1 receptor agonist therapy on nonfatal myocardial infarction in people with diabetes and established cardiovascular disease and chronic kidney disease. |

CI= confidence interval. OR = odds ratio. We used the point estimate of absolute effect for GLP-1 receptor agonists, obtained from GLP-1 receptor agonists versus placebo, to calculate absolute effect for SGLT-2 inhibitors v GLP-1 receptor agonists.



**Table 3 Nonfatal stroke**

| <b>Comparison</b>               | <b>Relative effect</b> | <b>Anticipated absolute effects over 5 years</b> |                          |                                | <b>Anticipated absolute effects (95% CI) over 5 years</b> | <b>Certainty in treatment effects (GRADE)</b> | <b>Plain text summary</b>                                                                                                                                       |
|---------------------------------|------------------------|--------------------------------------------------|--------------------------|--------------------------------|-----------------------------------------------------------|-----------------------------------------------|-----------------------------------------------------------------------------------------------------------------------------------------------------------------|
|                                 |                        | <b>Baseline risk</b>                             | <b>Risk with control</b> | <b>Risk with intervention</b>  |                                                           |                                               |                                                                                                                                                                 |
| SGLT-2 inhibitor versus placebo | OR 1.01 (0.89 to 1.14) | Very low                                         | Placebo: 30 per 1000     | SGLT-2 inhibitor: 30 per 1000  | 0 fewer per 1000 (from 3 fewer to 4 more)                 | Moderate due to indirectness                  | SGLT-2 inhibitors probably do not reduce nonfatal stroke in people with diabetes and few or no cardiovascular risk factors.                                     |
|                                 |                        | Low                                              | Placebo: 58 per 1000     | SGLT-2 inhibitor: 59 per 1000  | 1 more per 1000 (from 6 fewer to 8 more)                  | High                                          | SGLT-2 inhibitors do not reduce nonfatal stroke in people with diabetes and cardiovascular risk factors.                                                        |
|                                 |                        | Moderate                                         | Placebo: 108 per 1000    | SGLT-2 inhibitor: 109 per 1000 | 1 more per 1000 (from 11 fewer to 13 more)                | High                                          | SGLT-2 inhibitors do not reduce nonfatal stroke in people with diabetes and established cardiovascular disease.                                                 |
|                                 |                        | High                                             | Placebo: 120 per 1000    | SGLT-2 inhibitor: 121 per 1000 | 1 more per 1000 (from 12 fewer to 15 more)                | High                                          | SGLT-2 inhibitors do not reduce nonfatal stroke in people with diabetes and chronic kidney disease.                                                             |
|                                 |                        | Very high                                        | Placebo: 190 per 1000    | SGLT-2 inhibitor: 192 per 1000 | 2 more per 1000 (from 21 fewer to 17 more)                | High                                          | SGLT-2 inhibitors do not have an important effect on nonfatal stroke in people with diabetes and established cardiovascular disease and chronic kidney disease. |

**Table 3 Nonfatal stroke**

| Comparison                            | Relative effect        | Anticipated absolute effects over 5 years |                       |                                      | Anticipated absolute effects (95% CI) over 5 years | Certainty in treatment effects (GRADE) | Plain text summary                                                                                                                                |
|---------------------------------------|------------------------|-------------------------------------------|-----------------------|--------------------------------------|----------------------------------------------------|----------------------------------------|---------------------------------------------------------------------------------------------------------------------------------------------------|
|                                       |                        | Baseline risk                             | Risk with control     | Risk with intervention               |                                                    |                                        |                                                                                                                                                   |
| GLP-1 receptor agonist versus placebo | OR 0.84 (0.76 to 0.93) | Very low                                  | Placebo: 30 per 1000  | GLP-1 receptor agonist: 25 per 1000  | 5 fewer per 1000 (from 2 fewer to 7 fewer)         | Moderate due to indirectness           | GLP-1 receptor agonist therapy probably reduces nonfatal stroke in people with diabetes and few or no cardiovascular risk factors.                |
|                                       |                        | Low                                       | Placebo: 58 per 1000  | GLP-1 receptor agonist: 49 per 1000  | 9 fewer per 1000 (from 4 fewer to 13 fewer)        | High                                   | GLP-1 receptor agonist therapy reduces nonfatal stroke in people with diabetes and cardiovascular risk factors.                                   |
|                                       |                        | Moderate                                  | Placebo: 108 per 1000 | GLP-1 receptor agonist: 92 per 1000  | 16 fewer per 1000 (from 7 fewer to 24 fewer)       | High                                   | GLP-1 receptor agonist therapy reduces nonfatal stroke in people with diabetes and established cardiovascular disease.                            |
|                                       |                        | High                                      | Placebo: 120 per 1000 | GLP-1 receptor agonist: 103 per 1000 | 17 fewer per 1000 (from 7 fewer to 26 fewer)       | High                                   | GLP-1 receptor agonist therapy reduces nonfatal stroke in people with diabetes and chronic kidney disease.                                        |
|                                       |                        | Very high                                 | Placebo: 190 per 1000 | GLP-1 receptor agonist: 165 per 1000 | 25 fewer per 1000 (from 11 fewer to 39 fewer)      | High                                   | GLP-1 receptor agonist therapy reduces nonfatal stroke in people with diabetes and established cardiovascular disease and chronic kidney disease. |

**Table 3 Nonfatal stroke**

| Comparison                                     | Relative effect        | Anticipated absolute effects over 5 years |                                      |                                | Anticipated absolute effects (95% CI) over 5 years | Certainty in treatment effects (GRADE) | Plain text summary                                                                                                                                                                     |
|------------------------------------------------|------------------------|-------------------------------------------|--------------------------------------|--------------------------------|----------------------------------------------------|----------------------------------------|----------------------------------------------------------------------------------------------------------------------------------------------------------------------------------------|
|                                                |                        | Baseline risk                             | Risk with control                    | Risk with intervention         |                                                    |                                        |                                                                                                                                                                                        |
| SGLT-2 inhibitor versus GLP-1 receptor agonist | OR 1.20 (1.03 to 1.41) | Very low                                  | GLP-1 receptor agonist: 25 per 1000  | SGLT-2 inhibitor: 30 per 1000  | 5 more per 1000 (from 1 more to 10 more)           | Moderate due to indirectness           | GLP-1 receptor agonist therapy probably reduces nonfatal stroke compared to SGLT-2 inhibitor therapy in people with diabetes and few or no cardiovascular risk factors.                |
|                                                |                        | Low                                       | GLP-1 receptor agonist: 49 per 1000  | SGLT-2 inhibitor: 59 per 1000  | 10 more per 1000 (from 1 more to 12 more)          | High                                   | GLP-1 receptor agonist therapy reduces nonfatal stroke compared to SGLT-2 inhibitor therapy in people with diabetes and cardiovascular risk factors.                                   |
|                                                |                        | Moderate                                  | GLP-1 receptor agonist: 91 per 1000  | SGLT-2 inhibitor: 109 per 1000 | 18 more per 1000 (from 3 more to 37 more)          | High                                   | GLP-1 receptor agonist therapy reduces nonfatal stroke compared to SGLT-2 inhibitor therapy in people with diabetes and established cardiovascular disease.                            |
|                                                |                        | High                                      | GLP-1 receptor agonist: 101 per 1000 | SGLT-2 inhibitor: 121 per 1000 | 20 more per 1000 (from 3 more to 41 more)          | High                                   | GLP-1 receptor agonist therapy reduces nonfatal stroke compared to SGLT-2 inhibitor therapy in people with diabetes and chronic kidney disease.                                        |
|                                                |                        | Very high                                 | GLP-1 receptor agonist: 160 per 1000 | SGLT-2 inhibitor: 192 per 1000 | 32 more per 1000 (from 5 more to 66 more)          | High                                   | GLP-1 receptor agonist therapy reduces nonfatal stroke compared to SGLT-2 inhibitor therapy in people with diabetes and established cardiovascular disease and chronic kidney disease. |

CI= confidence interval. OR = odds ratio. We used the point estimate of absolute effect for GLP-1 receptor agonists, obtained from GLP-1 receptor agonists versus placebo, to calculate absolute effect for SGLT-2 inhibitors v GLP-1 receptor agonists.

**Table 4 Kidney failure**

| <b>Comparison</b>               | <b>Relative effect</b> | <b>Anticipated absolute effects over 5 years</b> |                          |                               |                                                           | <b>Certainty in treatment effects (GRADE)</b> | <b>Plain text summary</b>                                                                                                                  |
|---------------------------------|------------------------|--------------------------------------------------|--------------------------|-------------------------------|-----------------------------------------------------------|-----------------------------------------------|--------------------------------------------------------------------------------------------------------------------------------------------|
|                                 |                        | <b>Baseline risk</b>                             | <b>Risk with control</b> | <b>Risk with intervention</b> | <b>Anticipated absolute effects (95% CI) over 5 years</b> |                                               |                                                                                                                                            |
| SGLT-2 inhibitor versus placebo | OR 0.71 (0.57 to 0.89) | Very low                                         | Placebo: 2 per 1000      | SGLT-2 inhibitor: 1 per 1000  | 1 fewer per 1000 (from 0 fewer to 1 fewer)                | Moderate due to indirectness                  | SGLT-2 inhibitor therapy probably reduces kidney failure in people with diabetes and few or no risk factors for cardiovascular disease.    |
|                                 |                        | Low                                              | Placebo: 10 per 1000     | SGLT-2 inhibitor: 7 per 1000  | 3 fewer per 1000 (from 1 to 4 fewer)                      | High                                          | SGLT-2 inhibitor therapy reduces kidney failure in people with diabetes and cardiovascular risk factors.                                   |
|                                 |                        | Moderate                                         | Placebo: 20 per 1000     | SGLT-2 inhibitor: 14 per 1000 | 6 fewer per 1000 (from 2 to 9 fewer)                      | High                                          | SGLT-2 inhibitor therapy reduces kidney failure in people with diabetes and established cardiovascular disease.                            |
|                                 |                        | High                                             | Placebo: 92 per 1000     | SGLT-2 inhibitor: 67 per 1000 | 25 fewer (from 9 fewer to 37 fewer)                       | High                                          | SGLT-2 inhibitor therapy reduces kidney failure in people with diabetes and chronic kidney disease.                                        |
|                                 |                        | Very high                                        | Placebo: 148 per 1000    | SGLT-2 inhibitor: 110         | 38 fewer per 1000 (from 14 fewer to 58 fewer)             | High                                          | SGLT-2 inhibitor therapy reduces kidney failure in people with diabetes and established cardiovascular disease and chronic kidney disease. |

**Table 4 Kidney failure**

| Comparison                            | Relative effect        | Anticipated absolute effects over 5 years |                       |                                      | Anticipated absolute effects (95% CI) over 5 years | Certainty in treatment effects (GRADE) | Plain text summary                                                                                                                               |
|---------------------------------------|------------------------|-------------------------------------------|-----------------------|--------------------------------------|----------------------------------------------------|----------------------------------------|--------------------------------------------------------------------------------------------------------------------------------------------------|
|                                       |                        | Baseline risk                             | Risk with control     | Risk with intervention               |                                                    |                                        |                                                                                                                                                  |
| GLP-1 receptor agonist versus placebo | OR 0.78 (0.67 to 0.92) | Very low                                  | Placebo: 2 per 1000   | GLP-1 receptor agonist: 2 per 1000   | 0 fewer per 1000 (from 0 fewer to 1 fewer)         | Moderate due to indirectness           | GLP-1 receptor agonist therapy probably reduces kidney failure in people with diabetes and few or no risk factors for cardiovascular disease.    |
|                                       |                        | Low                                       | Placebo: 10 per 1000  | GLP-1 receptor agonist: 8 per 1000   | 2 fewer per 1000 (from 1 fewer to 3 fewer)         | High                                   | GLP-1 receptor agonist therapy reduces kidney failure in people with diabetes and cardiovascular risk factors.                                   |
|                                       |                        | Moderate                                  | Placebo: 20 per 1000  | GLP-1 receptor agonist: 16 per 1000  | 4 fewer per 1000 (from 2 fewer to 7 fewer)         | High                                   | GLP-1 receptor agonist therapy reduces kidney failure in people with diabetes and established cardiovascular disease.                            |
|                                       |                        | High                                      | Placebo: 92 per 1000  | GLP-1 receptor agonist: 67 per 1000  | 25 fewer per 1000 (from 9 fewer to 37 fewer)       | High                                   | GLP-1 receptor agonist therapy reduces kidney failure in people with diabetes and chronic kidney disease.                                        |
|                                       |                        | Very high                                 | Placebo: 148 per 1000 | GLP-1 receptor agonist: 110 per 1000 | 38 fewer per 1000 (from 14 fewer to 58 fewer)      | High                                   | GLP-1 receptor agonist therapy reduces kidney failure in people with diabetes and established cardiovascular disease and chronic kidney disease. |

**Table 4 Kidney failure**

| <b>Anticipated absolute effects over 5 years</b> |                        |                      |                                      |                                |                                                           |                                                 |                                                                                                                                                                                                                  |
|--------------------------------------------------|------------------------|----------------------|--------------------------------------|--------------------------------|-----------------------------------------------------------|-------------------------------------------------|------------------------------------------------------------------------------------------------------------------------------------------------------------------------------------------------------------------|
| <b>Comparison</b>                                | <b>Relative effect</b> | <b>Baseline risk</b> | <b>Risk with control</b>             | <b>Risk with intervention</b>  | <b>Anticipated absolute effects (95% CI) over 5 years</b> | <b>Certainty in treatment effects (GRADE)</b>   | <b>Plain text summary</b>                                                                                                                                                                                        |
| SGLT-2 inhibitor versus GLP-1 receptor agonist   | OR 0.91 (0.69 to 1.20) | Very low             | GLP-1 receptor agonist: 2 per 1000   | SGLT-2 inhibitor: 1 per 1000   | 0 fewer per 1000 (from 0 fewer to 1 more)                 | Low due to serious imprecision and indirectness | There is may be no difference between SGLT-2 inhibitor therapy and GLP-1 receptor agonist therapy on kidney failure in people with diabetes and few or no cardiovascular risk factors.                           |
|                                                  |                        | Low                  | GLP-1 receptor agonist: 8 per 1000   | SGLT-2 inhibitor: 7 per 1000   | 1 fewer per 1000 (from 2 fewer to 2 more)                 | Moderate due to serious imprecision             | There is probably no difference between SGLT-2 inhibitor therapy and GLP-1 receptor agonist therapy on kidney failure in people with diabetes and cardiovascular risk factors.                                   |
|                                                  |                        | Moderate             | GLP-1 receptor agonist: 16 per 1000  | SGLT-2 inhibitor: 15 per 1000  | 1 fewer per 1000 (from 5 fewer to 3 more)                 | Moderate due to serious imprecision             | There is probably no difference between SGLT-2 inhibitor therapy and GLP-1 receptor agonist therapy on kidney failure in people with diabetes and established cardiovascular disease.                            |
|                                                  |                        | High                 | GLP-1 receptor agonist: 73 per 1000  | SGLT-2 inhibitor: 67 per 1000  | 6 fewer per 1000 (from 21 fewer to 13 more)               | Moderate due to serious imprecision             | There is probably no difference between SGLT-2 inhibitor therapy and GLP-1 receptor agonist therapy on kidney failure in people with diabetes and chronic kidney disease.                                        |
|                                                  |                        | Very high            | GLP-1 receptor agonist: 119 per 1000 | SGLT-2 inhibitor: 109 per 1000 | 10 fewer per 1000 (from 34 fewer to 20 more)              | Moderate due to serious imprecision             | There is probably no difference between SGLT-2 inhibitor therapy and GLP-1 receptor agonist therapy on kidney failure in people with diabetes and established cardiovascular disease and chronic kidney disease. |

CI= confidence interval. OR = odds ratio. We used the point estimate of absolute effect for GLP-1 receptor agonists, obtained from GLP-1 receptor agonists versus placebo, to calculate absolute effect for SGLT-2 inhibitors v GLP-1 receptor agonists.

**Table 5 Hospitalisation for heart failure**

| Comparison                      | Relative effect        | Anticipated absolute effects over 5 years |                       |                                |  | Anticipated absolute effects (95% CI) over 5 years | Certainty in treatment effects (GRADE) | Plain text summary                                                                                                                                            |
|---------------------------------|------------------------|-------------------------------------------|-----------------------|--------------------------------|--|----------------------------------------------------|----------------------------------------|---------------------------------------------------------------------------------------------------------------------------------------------------------------|
|                                 |                        | Baseline risk                             | Risk with control     | Risk with intervention         |  |                                                    |                                        |                                                                                                                                                               |
| SGLT-2 inhibitor versus placebo | OR 0.70 (0.63 to 0.77) | Very low                                  | Placebo: 5 per 1000   | SGLT-2 inhibitor: 3 per 1000   |  | 2 fewer per 1000 (from 1 fewer to 2 fewer)         | Moderate due to indirectness           | SGLT-2 inhibitor therapy probably reduces hospitalisation for heart failure in people with diabetes and few or no risk factors for cardiovascular disease.    |
|                                 |                        | Low                                       | Placebo: 30 per 1000  | SGLT-2 inhibitor: 21 per 1000  |  | 9 fewer per 1000 (from 7 fewer to 11 fewer)        | High                                   | SGLT-2 inhibitor therapy reduces hospitalisation for heart failure in people with diabetes and cardiovascular risk factors.                                   |
|                                 |                        | Moderate                                  | Placebo: 80 per 1000  | SGLT-2 inhibitor: 57 per 1000  |  | 23 fewer per 1000 (from 17 fewer to 28 fewer)      | High                                   | SGLT-2 inhibitor therapy reduces hospitalisation for heart failure in people with diabetes and established cardiovascular disease.                            |
|                                 |                        | High                                      | Placebo: 105 per 1000 | SGLT-2 inhibitor: 76 per 1000  |  | 29 fewer (from 22 fewer to 36 fewer)               | High                                   | SGLT-2 inhibitor therapy reduces hospitalisation for heart failure in people with diabetes and chronic kidney disease.                                        |
|                                 |                        | Very high                                 | Placebo: 235 per 1000 | SGLT-2 inhibitor: 177 per 1000 |  | 58 fewer (from 44 fewer to 73 fewer)               | High                                   | SGLT-2 inhibitor therapy reduces hospitalisation for heart failure in people with diabetes and established cardiovascular disease and chronic kidney disease. |

**Table 5 Hospitalisation for heart failure**

| <b>Anticipated absolute effects over 5 years</b> |                        |                      |                          |                                      |                                                           |                                               |                                                                                                                                                                                                 |
|--------------------------------------------------|------------------------|----------------------|--------------------------|--------------------------------------|-----------------------------------------------------------|-----------------------------------------------|-------------------------------------------------------------------------------------------------------------------------------------------------------------------------------------------------|
| <b>Comparison</b>                                | <b>Relative effect</b> | <b>Baseline risk</b> | <b>Risk with control</b> | <b>Risk with intervention</b>        | <b>Anticipated absolute effects (95% CI) over 5 years</b> | <b>Certainty in treatment effects (GRADE)</b> | <b>Plain text summary</b>                                                                                                                                                                       |
| GLP-1 receptor agonist versus placebo            | OR 0.94 (0.85 to 1.03) | Very low             | Placebo: 5 per 1000      | GLP-1 receptor agonist: 5 per 1000   | 0 fewer per 1000 (from 0 fewer to 1 fewer)                | Moderate due to indirectness                  | GLP-1 receptor agonist therapy probably has little or no effect on hospitalisation for heart failure in people with diabetes and few or no risk factors for cardiovascular disease.             |
|                                                  |                        | Low                  | Placebo: 30 per 1000     | GLP-1 receptor agonist: 28 per 1000  | 2 fewer per 1000 (from 4 fewer to 1 more)                 | High                                          | GLP-1 receptor agonist therapy has little or no effect on hospitalisation for heart failure in people with diabetes and cardiovascular risk factors.                                            |
|                                                  |                        | Moderate             | Placebo: 80 per 1000     | GLP-1 receptor agonist: 76 per 1000  | 4 fewer per 1000 (from 11 fewer to 2 more)                | High                                          | GLP-1 receptor agonist therapy has little or no effect on hospitalisation for heart failure in people with diabetes and established cardiovascular disease.                                     |
|                                                  |                        | High                 | Placebo: 105 per 1000    | GLP-1 receptor agonist: 99 per 1000  | 6 fewer per 1000 (from 14 fewer to 3 more)                | High                                          | GLP-1 receptor agonist therapy has little or no effect on hospitalisation for heart failure in people with diabetes and chronic kidney disease.                                                 |
|                                                  |                        | Very high            | Placebo: 235 per 1000    | GLP-1 receptor agonist: 224 per 1000 | 11 fewer per 1000 (from 28 fewer to 5 more)               | High                                          | GLP-1 receptor agonist therapy probably has little or no effect on hospitalisation for heart failure in people with diabetes and established cardiovascular disease and chronic kidney disease. |



**Table 5 Hospitalisation for heart failure**

| Comparison                                     | Relative effect        | Anticipated absolute effects over 5 years |                                      |                                | Anticipated absolute effects (95% CI) over 5 years | Certainty in treatment effects (GRADE) | Plain text summary                                                                                                                                                                                         |
|------------------------------------------------|------------------------|-------------------------------------------|--------------------------------------|--------------------------------|----------------------------------------------------|----------------------------------------|------------------------------------------------------------------------------------------------------------------------------------------------------------------------------------------------------------|
|                                                |                        | Baseline risk                             | Risk with control                    | Risk with intervention         |                                                    |                                        |                                                                                                                                                                                                            |
| SGLT-2 inhibitor versus GLP-1 receptor agonist | OR 0.74 (0.65 to 0.85) | Very low                                  | GLP-1 receptor agonist: 5 per 1000   | SGLT-2 inhibitor: 4 per 1000   | 1 fewer per 1000 (from 1 fewer to 2 fewer)         | Moderate due to indirectness           | SGLT-2 inhibitor therapy probably reduces hospitalisation for heart failure compared with GLP-1 receptor agonist therapy in people with diabetes and few or no risk factors for cardiovascular disease.    |
|                                                |                        | Low                                       | GLP-1 receptor agonist: 28 per 1000  | SGLT-2 inhibitor: 21 per 1000  | 7 fewer per 1000 (from 4 fewer to 10 fewer)        | High                                   | SGLT-2 inhibitor therapy reduces hospitalisation for heart failure compared with GLP-1 receptor agonist therapy in people with diabetes and cardiovascular risk factors.                                   |
|                                                |                        | Moderate                                  | GLP-1 receptor agonist: 75 per 1000  | SGLT-2 inhibitor: 57 per 1000  | 18 fewer per 1000 (from 11 fewer to 25 fewer)      | High                                   | SGLT-2 inhibitor therapy reduces hospitalisation for heart failure compared with GLP-1 receptor agonist therapy in people with diabetes and established cardiovascular disease.                            |
|                                                |                        | High                                      | GLP-1 receptor agonist: 98 per 1000  | SGLT-2 inhibitor: 74 per 1000  | 24 fewer per 1000 (from 13 fewer to 32 fewer)      | High                                   | SGLT-2 inhibitor therapy reduces hospitalisation for heart failure compared with GLP-1 receptor agonist therapy in people with diabetes and chronic kidney disease.                                        |
|                                                |                        | Very high                                 | GLP-1 receptor agonist: 222 per 1000 | SGLT-2 inhibitor: 174 per 1000 | 48 fewer (from 27 fewer to 66 fewer)               | High                                   | SGLT-2 inhibitor therapy reduces hospitalisation for heart failure compared with GLP-1 receptor agonist therapy in people with diabetes and established cardiovascular disease and chronic kidney disease. |

CI= confidence interval. OR = odds ratio. We used the point estimate of absolute effect for GLP-1 receptor agonists, obtained from GLP-1 receptor agonists versus placebo, to calculate absolute effect for SGLT-2 inhibitors v GLP-1 receptor agonists.

**Table 6 Severe hypoglycaemia**

| <b>Comparison</b>                              | <b>Relative effect</b> | <b>Anticipated absolute effects over 5 years</b> |                                     | <b>Anticipated absolute effects (95% CI) over 5 years</b> | <b>Certainty in treatment effects (GRADE)</b> | <b>Plain text summary</b>                                                                                                    |
|------------------------------------------------|------------------------|--------------------------------------------------|-------------------------------------|-----------------------------------------------------------|-----------------------------------------------|------------------------------------------------------------------------------------------------------------------------------|
|                                                |                        | <b>Risk with control</b>                         | <b>Risk with intervention</b>       |                                                           |                                               |                                                                                                                              |
| SGLT-2 inhibitor versus placebo                | OR 0.90 (0.70,1.16)    | Placebo: 25 per 1000                             | SGLT-2 inhibitor: 23 per 1000       | 2 fewer per 1000 (from 8 fewer to 4 more)                 | High                                          | SGLT-2 inhibitor therapy does not incur severe hypoglycaemia                                                                 |
| GLP-1 receptor agonist versus placebo          | OR 0.92 (0.79,1.08)    | Placebo: 25 per 1000                             | GLP-1 receptor agonist: 24 per 1000 | 2 fewer per 1000 (from 5 fewer to 2 more)                 | High                                          | GLP-1 receptor agonist therapy does not incur severe hypoglycaemia                                                           |
| SGLT-2 inhibitor versus GLP-1 receptor agonist | OR 0.98 (0.73,1.31)    | GLP-1 receptor agonist: 23 per 1000              | SGLT-2 inhibitor: 23 per 1000       | 0 fewer per 1000 (from 6 fewer to 7 more)                 | Moderate due to serious imprecision           | There probably is no difference between SGLT-2 inhibitor therapy and GLP-1 receptor agonist therapy on serious hypoglycaemia |

CI= confidence interval. OR = odds ratio. We used the point estimate of absolute effect for GLP-1 receptor agonists, obtained from GLP-1 receptor agonists versus placebo, to calculate absolute effect for SGLT-2 inhibitors v GLP-1 receptor agonists.

**Table 7 Blindness**

| <b>Comparison</b>                              | <b>Relative effect</b> | <b>Anticipated absolute effects over 5 years</b> |                                    | <b>Anticipated absolute effects (95% CI) over 5 years</b> | <b>Certainty in treatment effects (GRADE)</b> | <b>Plain text summary</b>                                                                                    |
|------------------------------------------------|------------------------|--------------------------------------------------|------------------------------------|-----------------------------------------------------------|-----------------------------------------------|--------------------------------------------------------------------------------------------------------------|
|                                                |                        | <b>Risk with control</b>                         | <b>Risk with intervention</b>      |                                                           |                                               |                                                                                                              |
| SGLT-2 inhibitor versus placebo                | OR 0.17 (0.01,4.07)    | Placebo: 1 per 1000                              | SGLT-2 inhibitor: 0 per 1000       | 1 fewer per 1000 (from 1 fewer to 4 more)                 | Low due to very serious imprecision           | SGLT-2 inhibitor therapy may have no effect on blindness.                                                    |
| GLP-1 receptor agonist versus placebo          | OR 1.00 (0.23, 4.41)   | Placebo: 1 per 1000                              | GLP-1 receptor agonist: 1 per 1000 | 0 fewer per 1000 (from 1 fewer to 4 more)                 | Low due to very serious imprecision           | GLP-1 receptor agonist therapy may have no effect on blindness.                                              |
| SGLT-2 inhibitor versus GLP-1 receptor agonist | OR 0.99 (0.57,1.73)    | GLP-1 receptor agonist: 1 per 1000               | SGLT-2 inhibitor: 1 per 1000       | 0 fewer per 1000 (from 0 fewer to 1 more)                 | Low due to very serious imprecision           | There may be no difference between SGLT-2 inhibitor therapy and GLP-1 receptor agonist therapy on blindness. |

CI= confidence interval. OR = odds ratio. We used the point estimate of absolute effect for GLP-1 receptor agonists, obtained from GLP-1 receptor agonists versus placebo, to calculate absolute effect for SGLT-2 inhibitors v GLP-1 receptor agonists.

**Table 8 Health-related quality of life**

| <b>Comparison</b>                              | <b>Standardised mean difference (95% CI)</b> | <b>Certainty in treatment effects</b> | <b>Plain text summary</b>                                                                                                         |
|------------------------------------------------|----------------------------------------------|---------------------------------------|-----------------------------------------------------------------------------------------------------------------------------------|
| SGLT-2 inhibitor versus placebo                | 0.14 (-0.08 to 0.36)                         | Low due to very serious imprecision   | SGLT-2 inhibitors may have no effect on health-related quality of life.                                                           |
| GLP-1 receptor agonist versus placebo          | 0.13 (0.03 to 0.23)                          | Low due to very serious imprecision   | GLP-1 receptors may increase health-related quality of life.                                                                      |
| SGLT-2 inhibitor versus GLP-1 receptor agonist | 0.01 (-0.19 to 0.20)                         | Low due to very serious imprecision   | There may be no difference between SGLT-2 inhibitor therapy and GLP-1 receptor agonist therapy on health-related quality of life. |

CI= confidence interval. OR = odds ratio. We used the point estimate of absolute effect for GLP-1 receptor agonists, obtained from GLP-1 receptor agonists versus placebo, to calculate absolute effect for SGLT-2 inhibitors v GLP-1 receptor agonists.

**Table 9 Body weight**

| <b>Comparison</b>                                       | <b>Mean difference<br/>(95% CI)</b> | <b>Certainty in<br/>treatment<br/>effects</b>  | <b>Plain text summary</b>                                                           |
|---------------------------------------------------------|-------------------------------------|------------------------------------------------|-------------------------------------------------------------------------------------|
| SGLT-2<br>inhibitor versus<br>placebo                   | -1.92 kg (-2.23 to -1.62)           | Low due to<br>very serious<br>inconsistency    | SGLT-2 inhibitors may lower body weight.                                            |
| GLP-1 receptor<br>agonist versus<br>placebo             | -1.45 kg (-1.72 to -1.18)           | Low due to<br>very serious<br>inconsistency    | GLP-1 receptor agonists may lower body weight.                                      |
| SGLT-2<br>inhibitor versus<br>GLP-1 receptor<br>agonist | -0.47 kg (-0.85 to -0.09)           | Moderate<br>due to<br>serious<br>inconsistency | SGLT-2 inhibitors probably reduce body weight more<br>than GLP-1 receptor agonists. |

CI= confidence interval. OR = odds ratio. We used the point estimate of absolute effect for GLP-1 receptor agonists, obtained from GLP-1 receptor agonists versus placebo, to calculate absolute effect for SGLT-2 inhibitors v GLP-1 receptor agonists.

**Table 10 Amputation**

| <b>Anticipated absolute effects over 5 years</b> |                        |                      |                          |                               |                                                           |                                                 |                                                                                                                                                          |
|--------------------------------------------------|------------------------|----------------------|--------------------------|-------------------------------|-----------------------------------------------------------|-------------------------------------------------|----------------------------------------------------------------------------------------------------------------------------------------------------------|
| <b>Comparison</b>                                | <b>Relative effect</b> | <b>Baseline risk</b> | <b>Risk with control</b> | <b>Risk with intervention</b> | <b>Anticipated absolute effects (95% CI) over 5 years</b> | <b>Certainty in treatment effects (GRADE)</b>   | <b>Plain text summary</b>                                                                                                                                |
| SGLT-2 inhibitor versus placebo                  | OR 1.14 (0.96, 1.35)   | Very low             | Placebo: 10 per 1000     | SGLT-2 inhibitor: 11 per 1000 | 1 more per 1000 (from 1 fewer to 4 more)                  | Low due to serious imprecision and indirectness | SGLT-2 inhibitor therapy may have no effect on amputation in people with diabetes and few or no cardiovascular risk factors.                             |
|                                                  |                        | Low                  | Placebo: 12 per 1000     | SGLT-2 inhibitor: 13 per 1000 | 2 more per 1000 (from 1 fewer to 4 more)                  | Moderate due to serious imprecision             | SGLT-2 inhibitor therapy probably has no effect on amputation in people with diabetes and cardiovascular risk factors.                                   |
|                                                  |                        | Moderate             | Placebo: 45 per 1000     | SGLT-2 inhibitor: 50 per 1000 | 6 more per 1000 (from 2 fewer to 16 more)                 | Moderate due to serious imprecision             | SGLT-2 inhibitor therapy probably has no effect on amputation in people with diabetes and established cardiovascular disease.                            |
|                                                  |                        | High                 | Placebo: 55 per 1000     | SGLT-2 inhibitor: 61 per 1000 | 8 more per 1000 (from 2 fewer to 19 more)                 | Moderate due to serious imprecision             | SGLT-2 inhibitor therapy probably has no effect on amputation in people with diabetes and chronic kidney disease                                         |
|                                                  |                        | Very high            | Placebo: 94 per 1000     | Placebo: 104 per 1000         | 13 more per 1000 (from 4 fewer to 23 more)                | Moderate due to serious imprecision             | SGLT-2 inhibitor therapy probably has no effect on amputation in people with diabetes and established cardiovascular disease and chronic kidney disease. |

**Table 10 Amputation**

| <b>Anticipated absolute effects over 5 years</b> |                        |                      |                          |                                     |                                                           |                                                           |                                                                                                                                                                    |
|--------------------------------------------------|------------------------|----------------------|--------------------------|-------------------------------------|-----------------------------------------------------------|-----------------------------------------------------------|--------------------------------------------------------------------------------------------------------------------------------------------------------------------|
| <b>Comparison</b>                                | <b>Relative effect</b> | <b>Baseline risk</b> | <b>Risk with control</b> | <b>Risk with intervention</b>       | <b>Anticipated absolute effects (95% CI) over 5 years</b> | <b>Certainty in treatment effects (GRADE)</b>             | <b>Plain text summary</b>                                                                                                                                          |
| GLP-1 receptor agonist versus placebo            | OR 0.33 (0.01, 8.18)   | Very low             | Placebo: 10 per 1000     | GLP-1 receptor agonist: 3 per 1000  | 7 fewer per 1000 (from 10 fewer to 72 more)               | Very low due to very serious imprecision and indirectness | The effect of GLP-1 receptor agonist therapy on amputation is uncertain in people with diabetes and few or no cardiovascular risk factors.                         |
|                                                  |                        | Low                  | Placebo: 12 per 1000     | GLP-1 receptor agonist: 4 per 1000  | 8 fewer per 1000 (from 12 fewer to 86 more)               | Low due to very serious imprecision                       | The effect of GLP-1 receptor agonist therapy on amputation is uncertain in people with diabetes and cardiovascular risk factors.                                   |
|                                                  |                        | Moderate             | Placebo: 45 per 1000     | GLP-1 receptor agonist: 15 per 1000 | 30 fewer per 1000 (from 45 fewer to 324 more)             | Low due to very serious imprecision                       | The effect of GLP-1 receptor agonist therapy on amputation is uncertain in people with diabetes and established cardiovascular disease.                            |
|                                                  |                        | High                 | Placebo: 55 per 1000     | GLP-1 receptor agonist: 18 per 1000 | 37 fewer per 1000 (from 54 fewer to 395 more)             | Low due to very serious imprecision                       | The effect of GLP-1 receptor agonist therapy on amputation is uncertain in people with diabetes and chronic kidney disease.                                        |
|                                                  |                        | Very high            | Placebo: 94 per 1000     | GLP-1 receptor agonist: 31 per 1000 | 63 fewer (from 93 fewer to 676 more)                      | Low due to very serious imprecision                       | The effect of GLP-1 receptor agonist therapy on amputation is uncertain in people with diabetes and established cardiovascular disease and chronic kidney disease. |

**Table 10 Amputation**

| <b>Anticipated absolute effects over 5 years</b> |                        |                      |                                     |                                |                                                           |                                                           |                                                                                                                                                                                                                                    |
|--------------------------------------------------|------------------------|----------------------|-------------------------------------|--------------------------------|-----------------------------------------------------------|-----------------------------------------------------------|------------------------------------------------------------------------------------------------------------------------------------------------------------------------------------------------------------------------------------|
| <b>Comparison</b>                                | <b>Relative effect</b> | <b>Baseline risk</b> | <b>Risk with control</b>            | <b>Risk with intervention</b>  | <b>Anticipated absolute effects (95% CI) over 5 years</b> | <b>Certainty in treatment effects (GRADE)</b>             | <b>Plain text summary</b>                                                                                                                                                                                                          |
| SGLT-2 inhibitor versus GLP-1 receptor agonist   | OR 3.43 (0.14, 84.5)   | Very low             | GLP-1 receptor agonist: 3 per 1000  | SGLT-2 inhibitor: 10 per 1000  | 7 more per 1000 (from 3 fewer to 250 more)                | Very low due to very serious imprecision and indirectness | Whether there is an important difference between SGLT-2 inhibitor therapy and GLP-1 receptor agonist therapy on amputation is uncertain in people with diabetes and few or no cardiovascular risk factors.                         |
|                                                  |                        | Low                  | GLP-1 receptor agonist: 4 per 1000  | SGLT-2 inhibitor: 13 per 1000  | 10 more per 1000 (from 3 fewer to 334 more)               | Low due to very serious imprecision                       | Whether there is an important difference between SGLT-2 inhibitor therapy and GLP-1 receptor agonist therapy on amputation is uncertain in people with diabetes and cardiovascular risk factors.                                   |
|                                                  |                        | Moderate             | GLP-1 receptor agonist: 15 per 1000 | SGLT-2 inhibitor: 50 per 1000  | 36 more per 1000 (from 13 fewer to 1000 more)             | Low due to very serious imprecision                       | Whether there is an important difference between SGLT-2 inhibitor therapy and GLP-1 receptor agonist therapy on amputation is uncertain in people with diabetes and established cardiovascular disease.                            |
|                                                  |                        | High                 | GLP-1 receptor agonist: 18 per 1000 | SGLT-2 inhibitor: 60 per 1000  | 42 more per 1000 (from 15 fewer to 1000 more)             | Low due to very serious imprecision                       | Whether there is an important difference between SGLT-2 inhibitor therapy and GLP-1 receptor agonist therapy on amputation is uncertain in people with diabetes and chronic kidney disease.                                        |
|                                                  |                        | Very high            | GLP-1 receptor agonist: 31 per 1000 | SGLT-2 inhibitor: 103 per 1000 | 72 more per 1000 (from 27 fewer to 1000 more)             | Low due to very serious imprecision                       | Whether there is an important difference between SGLT-2 inhibitor therapy and GLP-1 receptor agonist therapy on amputation is uncertain in people with diabetes and established cardiovascular disease and chronic kidney disease. |



CI= confidence interval. OR = odds ratio. We used the point estimate of absolute effect for GLP-1 receptor agonists, obtained from GLP-1 receptor agonists versus placebo, to calculate absolute effect for SGLT-2 inhibitors v GLP-1 receptor agonists.

**Table 11 Neuropathic pain**

| Comparison                                     | Relative effect     | Anticipated absolute effects over 5 years |                                    |                                                    | Certainty in treatment effects (GRADE)                                     | Plain text summary                                                                                                                           |
|------------------------------------------------|---------------------|-------------------------------------------|------------------------------------|----------------------------------------------------|----------------------------------------------------------------------------|----------------------------------------------------------------------------------------------------------------------------------------------|
|                                                |                     | Risk with control                         | Risk with intervention             | Anticipated absolute effects (95% CI) over 5 years |                                                                            |                                                                                                                                              |
| SGLT-2 inhibitor versus placebo                | NA                  | Placebo: 2 per 1000                       | SGLT-2 inhibitor: NA               | NA                                                 | NA                                                                         | Whether SGLT-2 inhibitor therapy has an effect on neuropathic pain is uncertain.                                                             |
| GLP-1 receptor agonist versus placebo          | OR 0.33 (0.01,8.19) | Placebo: 2 per 1000                       | GLP-1 receptor agonist: 1 per 1000 | 1 fewer per 1000 (from 2 fewer to 14 more)         | Very low due to very serious imprecision and inconsistency between studies | Whether GLP-1 receptor agonist therapy has an effect on neuropathic pain is uncertain.                                                       |
| SGLT-2 inhibitor versus GLP-1 receptor agonist | NA                  | GLP-1 receptor agonist: 1 per 1000        | SGLT-2 inhibitor: NA               | NA                                                 | NA                                                                         | Whether there is any difference between SGLT-2 inhibitor therapy and GLP-1 receptor agonist therapy on neuropathic pain or not is uncertain. |

CI= confidence interval. OR = odds ratio. We used the point estimate of absolute effect for GLP-1 receptor agonists, obtained from GLP-1 receptor agonists versus placebo, to calculate absolute effect for SGLT-2 inhibitors v GLP-1 receptor agonists.

**Table 12 Diabetic ketoacidosis**

| <b>Comparison</b>                              | <b>Anticipated absolute effects over 5 years</b> |                                    |                                    | <b>Anticipated absolute effects (95% CI) over 5 years</b> | <b>Certainty in treatment effects (GRADE)</b> | <b>Plain text summary</b>                                                                            |
|------------------------------------------------|--------------------------------------------------|------------------------------------|------------------------------------|-----------------------------------------------------------|-----------------------------------------------|------------------------------------------------------------------------------------------------------|
|                                                | <b>Relative effect</b>                           | <b>Risk with control</b>           | <b>Risk with intervention</b>      |                                                           |                                               |                                                                                                      |
| SGLT-2 inhibitor versus placebo                | OR 1.04 (0.61, 1.78)                             | Placebo: 2 per 1000                | SGLT-2 inhibitor: 2 per 1000       | 0 more per 1000 (from 1 fewer to 2 more)                  | Moderate due to serious imprecision           | SGLT-2 inhibitor therapy probably has no effect on diabetic ketoacidosis.                            |
| GLP-1 receptor agonist versus placebo          | OR 0.61 (0.33, 1.11)                             | Placebo: 2 per 1000                | GLP-1 receptor agonist: 1 per 1000 | 1 fewer per 1000 (from 1 fewer to 0)                      | Moderate due to serious imprecision           | GLP-1 receptor agonist therapy probably has no effect on diabetic ketoacidosis.                      |
| SGLT-2 inhibitor versus GLP-1 receptor agonist | OR 1.71 (0.79, 3.69)                             | GLP-1 receptor agonist: 1 per 1000 | SGLT-2 inhibitor: 2 per 1000       | 1 more per 1000 (from 0 to 3 more)                        | Moderate due to serious imprecision           | There probably is no difference between SGLT-2 inhibitor therapy and GLP-1 receptor agonist therapy. |

CI= confidence interval. OR = odds ratio. We used the point estimate of absolute effect for GLP-1 receptor agonists, obtained from GLP-1 receptor agonists versus placebo, to calculate absolute effect for SGLT-2 inhibitors v GLP-1 receptor agonists.

**Table 13 Serious hyperglycaemia**

| Comparison                                     | Relative effect      | Anticipated absolute effects over 5 years |                                     |                                                    | Certainty in treatment effects (GRADE) | Plain text summary                                                                                                             |
|------------------------------------------------|----------------------|-------------------------------------------|-------------------------------------|----------------------------------------------------|----------------------------------------|--------------------------------------------------------------------------------------------------------------------------------|
|                                                |                      | Risk with control                         | Risk with intervention              | Anticipated absolute effects (95% CI) over 5 years |                                        |                                                                                                                                |
| SGLT-2 inhibitor versus placebo                | OR 0.59 (0.35, 1.01) | Placebo: 25 per 1000                      | SGLT-2 inhibitor: 15 per 1000       | 10 fewer per 1000 (from 0 to 16 fewer)             | Moderate due to serious imprecision    | SGLT-2 inhibitor therapy probably decreases serious hyperglycaemia.                                                            |
| GLP-1 receptor agonist versus placebo          | OR 0.40 (0.25, 0.64) | Placebo: 25 per 1000                      | GLP-1 receptor agonist: 10 per 1000 | 15 fewer per 1000 (from 9 to 19 fewer)             | High                                   | GLP-1 receptor agonist therapy decreases serious hyperglycaemia.                                                               |
| SGLT-2 inhibitor versus GLP-1 receptor agonist | OR 1.48 (0.75, 2.93) | GLP-1 receptor agonist: 10 per 1000       | SGLT-2 inhibitor: 15 per 1000       | 5 more per 1000 (from 2 fewer to 19 more)          | Moderate due to serious imprecision    | There probably is no difference in serious hyperglycaemia between SGLT-2 inhibitor therapy and GLP-1 receptor agonist therapy. |

CI= confidence interval. OR = odds ratio. We used the point estimate of absolute effect for GLP-1 receptor agonists, obtained from GLP-1 receptor agonists versus placebo, to calculate absolute effect for SGLT-2 inhibitors v GLP-1 receptor agonists.

**Table 14 Genital infection**

| Comparison                                     | Anticipated absolute effects over 5 years |                                     |                                     | Anticipated absolute effects (95% CI) over 5 years | Certainty in treatment effects (GRADE) | Plain text summary                                                                  |
|------------------------------------------------|-------------------------------------------|-------------------------------------|-------------------------------------|----------------------------------------------------|----------------------------------------|-------------------------------------------------------------------------------------|
|                                                | Relative effect                           | Risk with control                   | Risk with intervention              |                                                    |                                        |                                                                                     |
| SGLT-2 inhibitor versus placebo                | OR 3.50 (3.01, 4.07)                      | Placebo: 73 per 1000                | SGLT-2 inhibitor: 216 per 1000      | 143 more per 1000 (from 119 more to 170 more)      | High                                   | SGLT-2 inhibitor therapy increases genital infection.                               |
| GLP-1 receptor agonist versus placebo          | OR 0.70 (0.34, 1.44)                      | Placebo: 73 per 1000                | GLP-1 receptor agonist: 52 per 1000 | 21 fewer per 1000 (from 47 fewer to 29 more)       | Moderate due to serious imprecision    | GLP-1 receptor agonist therapy probably does not increase genital infection.        |
| SGLT-2 inhibitor versus GLP-1 receptor agonist | OR 5.00 (2.45, 10.2)                      | GLP-1 receptor agonist: 50 per 1000 | SGLT-2 inhibitor: 208 per 1000      | 158 more per 1000 (from 64 to 299 more)            | High                                   | SGLT-2 inhibitors increase genital infection compared with GLP-1 receptor agonists. |

CI= confidence interval. We used the point estimate of absolute effect for GLP-1 receptor agonists, obtained from GLP-1 receptor agonists versus placebo, to calculate absolute effect for SGLT-2 inhibitors v GLP-1 receptor agonists.

**Table 15 Fournier gangrene**

| <b>Comparison</b>                              | <b>Anticipated absolute effects over 5 years</b> |                            |                               | <b>Anticipated absolute effects (95% CI) over 5 years</b> | <b>Certainty in treatment effects (GRADE)</b> | <b>Plain text summary</b>                                                                                            |
|------------------------------------------------|--------------------------------------------------|----------------------------|-------------------------------|-----------------------------------------------------------|-----------------------------------------------|----------------------------------------------------------------------------------------------------------------------|
|                                                | <b>Relative effect</b>                           | <b>Risk with control</b>   | <b>Risk with intervention</b> |                                                           |                                               |                                                                                                                      |
| SGLT-2 inhibitors versus placebo               | OR 0.56 (0.16, 19.2)                             | Placebo: 1 per 1000        | SGLT-2 inhibitor: 1 per 1000  | 0 fewer per 1000 (1 fewer to 18 more)                     | Low due to very serious imprecision           | Whether or not SGLT-2 inhibitor therapy has an effect on Fournier gangrene is uncertain.                             |
| GLP-1 receptor agonist versus placebo          | NA                                               | Placebo: 1 per 1000        | GLP-1 receptor agonist: NA    | NA                                                        | NA                                            | Whether or not GLP-1 receptor agonist therapy has an effect on Fournier gangrene is uncertain.                       |
| SGLT-2 inhibitor versus GLP-1 receptor agonist | NA                                               | GLP-1 receptor agonist: NA | SGLT-2 inhibitor: NA          | NA                                                        | NA                                            | Whether SGLT-2 inhibitor or GLP-1 receptor agonist therapy have different effects on Fournier gangrene is uncertain. |

CI= confidence interval. NA = not available. OR = odds ratio. We used the point estimate of absolute effect for GLP-1 receptor agonists, obtained from GLP-1 receptor agonists versus placebo, to calculate absolute effect for SGLT-2 inhibitors v GLP-1 receptor agonists.

**Table 16 Severe gastrointestinal events**

| <b>Comparison</b>                              | <b>Anticipated absolute effects over 5 years</b> |                            |                                      | <b>Anticipated absolute effects (95% CI) over 5 years</b> | <b>Certainty in treatment effects (GRADE)</b>                    | <b>Plain text summary</b>                                                                                                                          |
|------------------------------------------------|--------------------------------------------------|----------------------------|--------------------------------------|-----------------------------------------------------------|------------------------------------------------------------------|----------------------------------------------------------------------------------------------------------------------------------------------------|
|                                                | <b>Relative effect</b>                           | <b>Risk with control</b>   | <b>Risk with intervention</b>        |                                                           |                                                                  |                                                                                                                                                    |
| SGLT-2 inhibitor versus placebo                | NA                                               | Placebo: 44 per 1000       | SGLT-2 inhibitor: NA                 | NA                                                        | NA                                                               | Whether or not SGLT-2 inhibitor therapy has an effect on severe gastrointestinal events is uncertain.                                              |
| GLP-1 receptor agonist versus placebo          | OR 2.46(1.22, 4.97)                              | Placebo: 44                | GLP-1 receptor agonist: 102 per 1000 | 58 more per 1000 (from 9 to 142 more)                     | Low due to serious imprecision and inconsistency between studies | GLP-1 receptor agonists may increase severe gastrointestinal events.                                                                               |
| SGLT-2 inhibitor versus GLP-1 receptor agonist | NA                                               | GLP-1 receptor agonist: NA | SGLT-2 inhibitor: NA                 | NA                                                        | NA                                                               | Whether there is a difference between SGLT-2 inhibitor therapy and GLP-1 receptor agonist therapy on serious gastrointestinal events is uncertain. |

CI= confidence interval. OR = odds ratio. We used the point estimate of absolute effect for GLP-1 receptor agonists, obtained from GLP-1 receptor agonists versus placebo, to calculate absolute effect for SGLT-2 inhibitors v GLP-1 receptor agonists.

**Table 17 Pancreatic cancer**

| <b>Comparison</b>                              | <b>Anticipated absolute effects over 5 years</b> |                                    |                                    | <b>Anticipated absolute effects (95% CI) over 5 years</b> | <b>Certainty in treatment effects (GRADE)</b> | <b>Plain text summary</b>                                                                                                            |
|------------------------------------------------|--------------------------------------------------|------------------------------------|------------------------------------|-----------------------------------------------------------|-----------------------------------------------|--------------------------------------------------------------------------------------------------------------------------------------|
|                                                | <b>Relative effect</b>                           | <b>Risk with control</b>           | <b>Risk with intervention</b>      |                                                           |                                               |                                                                                                                                      |
| SGLT-2 inhibitor versus placebo                | OR 1.77 (0.55, 5.75)                             | Placebo: 4 per 1000                | SGLT-2 inhibitor: 7 per 1000       | 3 more per 1000 (2 fewer to 19 more)                      | Low due to very serious imprecision           | Whether or not SGLT-2 inhibitor therapy has an effect on pancreatic cancer is uncertain.                                             |
| GLP-1 receptor agonist versus placebo          | OR 1.19 (0.78, 1.81)                             | Placebo: 4 per 1000                | GLP-1 receptor agonist: 5 per 1000 | 1 more per 1000 (1 fewer to 3 more)                       | Moderate due to serious imprecision           | GLP-1 receptor therapy probably has little or no effect on pancreatic cancer                                                         |
| SGLT-2 inhibitor versus GLP-1 receptor agonist | OR 1.49 (0.43, 5.19)                             | GLP-1 receptor agonist: 5 per 1000 | SGLT-2 inhibitor: 7 per 1000       | 2 more per 1000 (3 fewer to 21 more)                      | Low due to very serious imprecision           | Whether there is a difference between SGLT-2 inhibitor therapy and GLP-1 receptor agonist therapy on pancreatic cancer is uncertain. |

CI= confidence interval. OR = odds ratio. We used the point estimate of absolute effect for GLP-1 receptor agonists, obtained from GLP-1 receptor agonists versus placebo, to calculate absolute effect for SGLT-2 inhibitors v GLP-1 receptor agonists.



**Table 18 Pancreatitis**

| <b>Comparison</b>                              | <b>Anticipated absolute effects over 5 years</b> |                                    |                                    | <b>Anticipated absolute effects (95% CI) over 5 years</b> | <b>Certainty in treatment effects (GRADE)</b> | <b>Plain text summary</b>                                                                             |
|------------------------------------------------|--------------------------------------------------|------------------------------------|------------------------------------|-----------------------------------------------------------|-----------------------------------------------|-------------------------------------------------------------------------------------------------------|
|                                                | <b>Relative effect</b>                           | <b>Risk with control</b>           | <b>Risk with intervention</b>      |                                                           |                                               |                                                                                                       |
| SGLT-2 inhibitor versus placebo                | OR 0.64 (0.39, 1.05)                             | Placebo: 5 per 1000                | SGLT-2 inhibitor: 3 per 1000       | 2 fewer per 1000 (3 fewer to 0)                           | Moderate due to serious imprecision           | SGLT-2 inhibitor therapy probably has no effect on pancreatitis.                                      |
| GLP-1 receptor agonist versus placebo          | OR 1.18 (0.90, 1.56)                             | Placebo: 5 per 1000                | GLP-1 receptor agonist: 6 per 1000 | 1 more per 1000 (1 fewer to 3 more)                       | Moderate due to serious imprecision           | GLP-1 receptor agonist therapy probably has no effect on pancreatitis.                                |
| SGLT-2 inhibitor versus GLP-1 receptor agonist | OR 0.54 (0.31, 0.94)                             | GLP-1 receptor agonist: 6 per 1000 | SGLT-2 inhibitor: 3 per 1000       | 3 fewer per 1000 (4 fewer to 0)                           | Moderate due to serious imprecision           | SGLT-2 inhibitor therapy probably has lower odds of pancreatitis than GLP-1 receptor agonist therapy. |

CI= confidence interval. OR = odds ratio. We used the point estimate of absolute effect for GLP-1 receptor agonists, obtained from GLP-1 receptor agonists versus placebo, to calculate absolute effect for SGLT-2 inhibitors v GLP-1 receptor agonists.

**Table 19 Glycated haemoglobin A1C**

| <b>Comparison</b>                              | <b>Mean difference (95% CI)</b> | <b>Certainty in treatment effects</b>            | <b>Plain text summary</b>                                                                          |
|------------------------------------------------|---------------------------------|--------------------------------------------------|----------------------------------------------------------------------------------------------------|
| SGLT-2 inhibitor versus placebo                | -0.60% (-0.67 to -0.54)         | Low due to serious imprecision and inconsistency | SGLT-2 inhibitor therapy may lower glycated haemoglobin A1C.                                       |
| GLP-1 receptor agonist versus placebo          | -0.89% (-0.95 to -0.82)         | Low due to serious imprecision and inconsistency | GLP-1 receptor therapy may lower glycated haemoglobin A1C.                                         |
| SGLT-2 inhibitor versus GLP-1 receptor agonist | 0.28% (0.19 to 0.37)            | High                                             | GLP-1 receptor agonist therapy lowers glycated haemoglobin A1C more than SGLT-2 inhibitor therapy. |

CI= confidence interval. We used the point estimate of absolute effect for GLP-1 receptor agonists, obtained from GLP-1 receptor agonists versus placebo, to calculate absolute effect for SGLT-2 inhibitors v GLP-1 receptor agonists.

**Appendix 9 Subgroup and meta-regression analysis for SGLT-2 inhibitors and GLP-1 receptor agonists compared to placebo for the outcome of all-cause mortality**

| <b>SGLT-2 inhibitor versus placebo</b>          |                                             |                                           |
|-------------------------------------------------|---------------------------------------------|-------------------------------------------|
| <b>Subgroup</b>                                 | <b>Odds ratio (95% confidence interval)</b> | <b>P value for subgroup heterogeneity</b> |
| High cardiovascular risk                        | 0.85 (0.78-0.92)                            | 0.99                                      |
| Low cardiovascular risk                         | 0.85 (0.70-1.03)                            |                                           |
| Body mass index 30 kg/m <sup>2</sup> or higher  | 0.86 (0.79-0.93)                            | 0.66                                      |
| Body mass index lower than 30 kg/m <sup>2</sup> | 0.81 (0.65-1.02)                            |                                           |
| Trial duration 12 months or longer              | 0.85 (0.79-0.91)                            | 0.58                                      |
| Trial duration <12 months                       | 1.03 (0.52-2.05)                            |                                           |
| Chronic kidney disease                          | 0.85 (0.79-0.92)                            | 0.80                                      |
| No chronic kidney disease                       | 0.83 (0.68-1.02)                            |                                           |
| <b>GLP-1 receptor agonists versus placebo</b>   |                                             |                                           |
| High cardiovascular risk                        | 0.90 (0.82-1.00)                            | 0.55                                      |
| Low cardiovascular risk                         | 0.87 (0.80-0.94)                            |                                           |
| Body mass index 30 kg/m <sup>2</sup> or higher  | 0.88 (0.82-0.94)                            | 0.38                                      |
| Body mass index lower than 30 kg/m <sup>2</sup> | 0.33 (0.03-3.21)                            |                                           |
| Trial duration 12 months or longer              | 0.88 (0.83-0.94)                            | 0.97                                      |
| Trial duration <12 months                       | 0.89 (0.52-1.54)                            |                                           |
| Chronic kidney disease                          | Not estimable                               |                                           |
| No chronic kidney disease                       |                                             |                                           |
